# Supplementary material for: Holophyllane A: A Triterpenoid Possessing an Unprecedented B-nor-3,4-seco-17,14-friedo-lanostane Architecture from Abies holophylla
Source: PubMed Central journal article supplement (PMC5333622; doi:10.1038/srep43646), 2017-03-02
Supplement: srep43646-s1.pdf [file srep43646-s1.pdf]

# Supporting Information

## Holophyllane A: A Triterpenoid Possessing an Unprecedented B-nor-3,4-*seco*-17,14-*friedo*-lanostane Architecture from *Abies holophylla*

Chung Sub Kim<sup>1</sup>, Joonseok Oh<sup>2,3</sup>, Lalita Subedi<sup>4,5</sup>, Sun Yeou Kim<sup>4,5</sup>, Sang Un Choi<sup>6</sup>, and  
Kang Ro Lee<sup>1,\*</sup>

<sup>1</sup>Natural Products Laboratory, School of Pharmacy, Sungkyunkwan University, Suwon  
16419, Republic of Korea

<sup>2</sup>Department of Chemistry, Yale University, New Haven, Connecticut 06520, United States

<sup>3</sup>Chemical Biology Institute, Yale University, West Haven, Connecticut 06516, United States

<sup>4</sup>Gachon Institute of Pharmaceutical Science, Gachon University, Incheon 21936, Republic of  
Korea

<sup>5</sup>College of Pharmacy, Gachon University, #191, Hambakmoero, Yeonsu-gu, Incheon 21936,  
Republic of Korea

<sup>6</sup>Korea Research Institute of Chemical Technology, Daejeon 34114, Republic of Korea

## Contents

|                                                                                                                                                                                                             |            |
|-------------------------------------------------------------------------------------------------------------------------------------------------------------------------------------------------------------|------------|
| <b>Figure S1. Dose response curves of compounds 1 and 2, and positive controls (etoposide and doxorubicin).....</b>                                                                                         | <b>3</b>   |
| <b>Figure S2. COSY (blue bolds), HMBC (red arrows), and NOESY (yellow dashed) correlations of 2.....</b>                                                                                                    | <b>4</b>   |
| <b>Figure S3. HPLC-DAD (195 nm) profiling of compound 1.....</b>                                                                                                                                            | <b>5</b>   |
| <b>Figure S4. HPLC-DAD (195 nm) profiling of compound 2.....</b>                                                                                                                                            | <b>6</b>   |
| <b>Figure S5. HRFABMS spectra of 1.....</b>                                                                                                                                                                 | <b>7</b>   |
| <b>Figure S6. <sup>1</sup>H NMR spectrum of 1.....</b>                                                                                                                                                      | <b>9</b>   |
| <b>Figure S7. <sup>13</sup>C NMR spectrum of 1.....</b>                                                                                                                                                     | <b>10</b>  |
| <b>Figure S8. DEPT 90 spectrum of 1 .....</b>                                                                                                                                                               | <b>11</b>  |
| <b>Figure S9. DEPT 135 spectrum of 1 .....</b>                                                                                                                                                              | <b>12</b>  |
| <b>Figure S10. COSY spectrum of 1.....</b>                                                                                                                                                                  | <b>13</b>  |
| <b>Figure S11. HSQC spectrum of 1.....</b>                                                                                                                                                                  | <b>14</b>  |
| <b>Figure S12. HMBC spectrum of 1 .....</b>                                                                                                                                                                 | <b>15</b>  |
| <b>Figure S13. NOESY spectrum of 1 .....</b>                                                                                                                                                                | <b>16</b>  |
| <b>Figure S14. HRFABMS spectra of 2.....</b>                                                                                                                                                                | <b>18</b>  |
| <b>Figure S15. <sup>1</sup>H NMR spectrum of 2.....</b>                                                                                                                                                     | <b>20</b>  |
| <b>Figure S16. <sup>13</sup>C NMR spectrum of 2.....</b>                                                                                                                                                    | <b>21</b>  |
| <b>Figure S17. COSY spectrum of 2.....</b>                                                                                                                                                                  | <b>22</b>  |
| <b>Figure S18. HSQC spectrum of 2 .....</b>                                                                                                                                                                 | <b>23</b>  |
| <b>Figure S19. HMBC spectrum of 2 .....</b>                                                                                                                                                                 | <b>24</b>  |
| <b>Figure S20. NOESY spectrum of 2 .....</b>                                                                                                                                                                | <b>25</b>  |
| <b>Table S1. Computed thermodynamic data and zero-point vibrational energy of conformers of 1 (PCM, CHCl<sub>3</sub>) used for chemical shift values and ECD simulation (B3LYP/6-31+(d,p)).....</b>         | <b>26</b>  |
| <b>Table S2. Boltzmann populations of conformers shown in Table S1.....</b>                                                                                                                                 | <b>28</b>  |
| <b>Table S3. Calculated thermodynamic data and zero-point vibrational energy of conformers of 1 (gas phase) employed for chemical shift values and ECD simulation at the B3LYP/6-311+(2d,p) level .....</b> | <b>30</b>  |
| <b>Table S4. Boltzmann populations of conformers described in Table S3 .....</b>                                                                                                                            | <b>32</b>  |
| <b>Table S5. Experimental and PCM calculation (CHCl<sub>3</sub>) for <sup>13</sup>C chemical shift values of compound 1 at B3LYP/6-31G+(d,p) and B3LYP/6-311G+(2d,p) .....</b>                              | <b>34</b>  |
| <b>Coordinates of conformers found at B3LYP/6-311G+(2d,p) in the gas phase .....</b>                                                                                                                        | <b>35</b>  |
| <b>Coordinates of conformers at B3LYP/6-31G+(d,p) in the PCM (CHCl<sub>3</sub>) .....</b>                                                                                                                   | <b>151</b> |

**Figure S1. Dose response curves of compounds 1 and 2, and positive controls (etoposide and doxorubicin)**

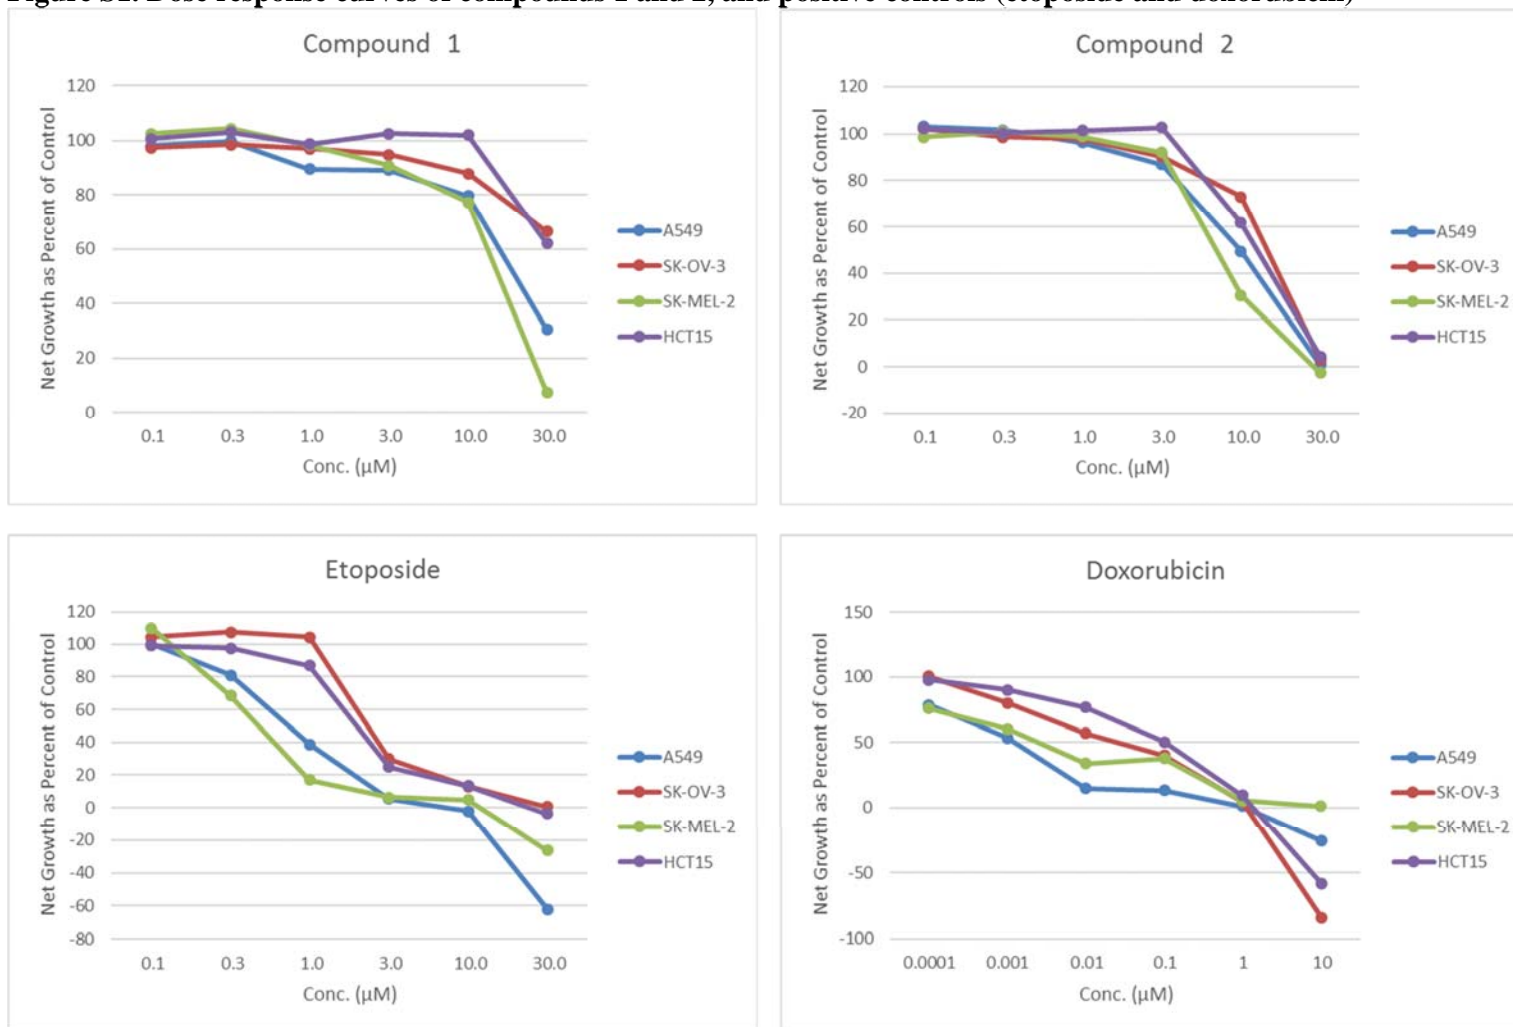

Figure S2. COSY (blue bolds), HMBC (red arrows), and NOESY (yellow dashed) correlations of 2

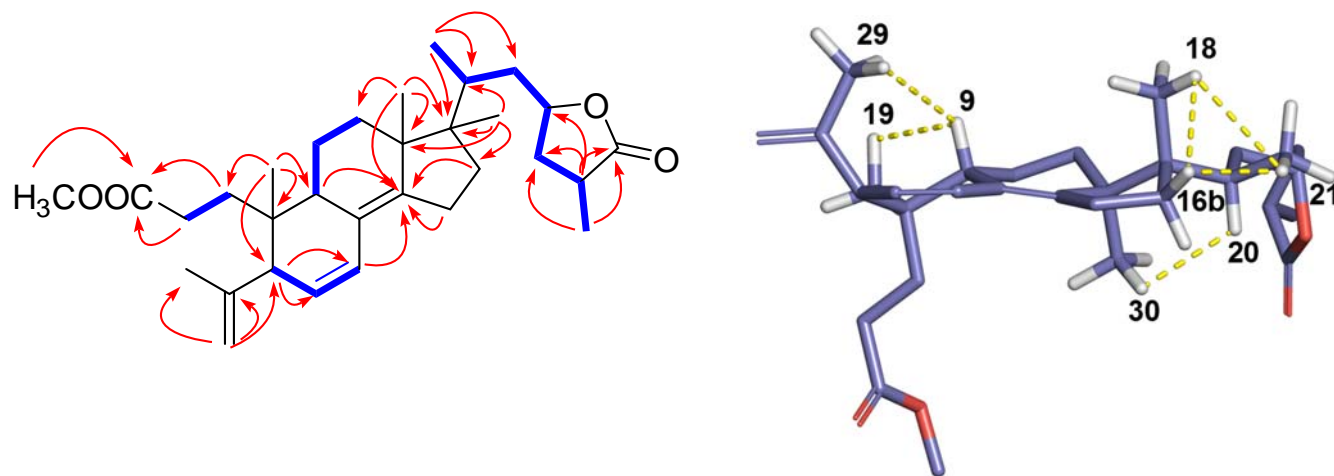

Figure S3. HPLC–DAD (195 nm) profiling of compound 1

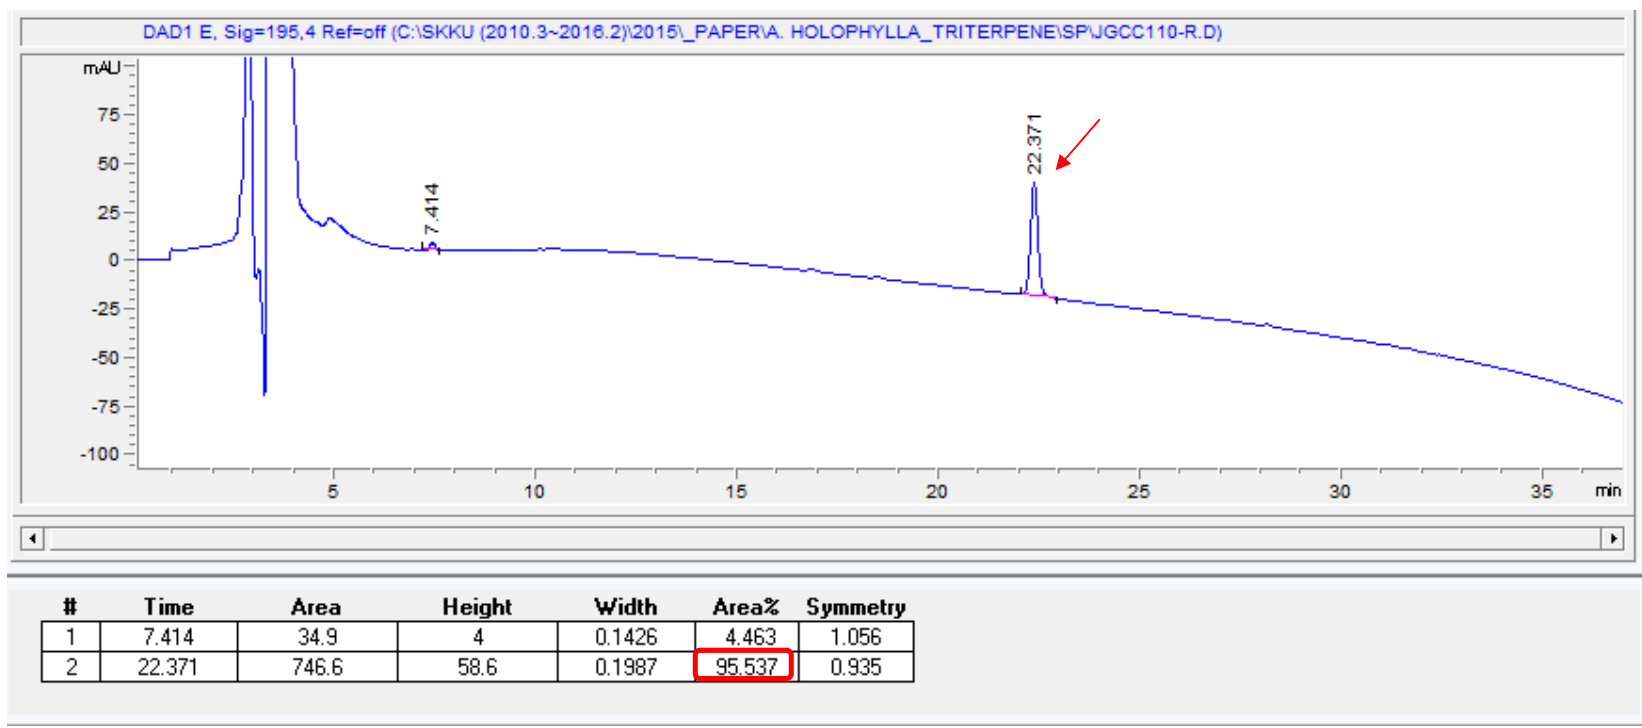

Purity of compound 1: 95.5%

Figure S4. HPLC–DAD (195 nm) profiling of compound 2

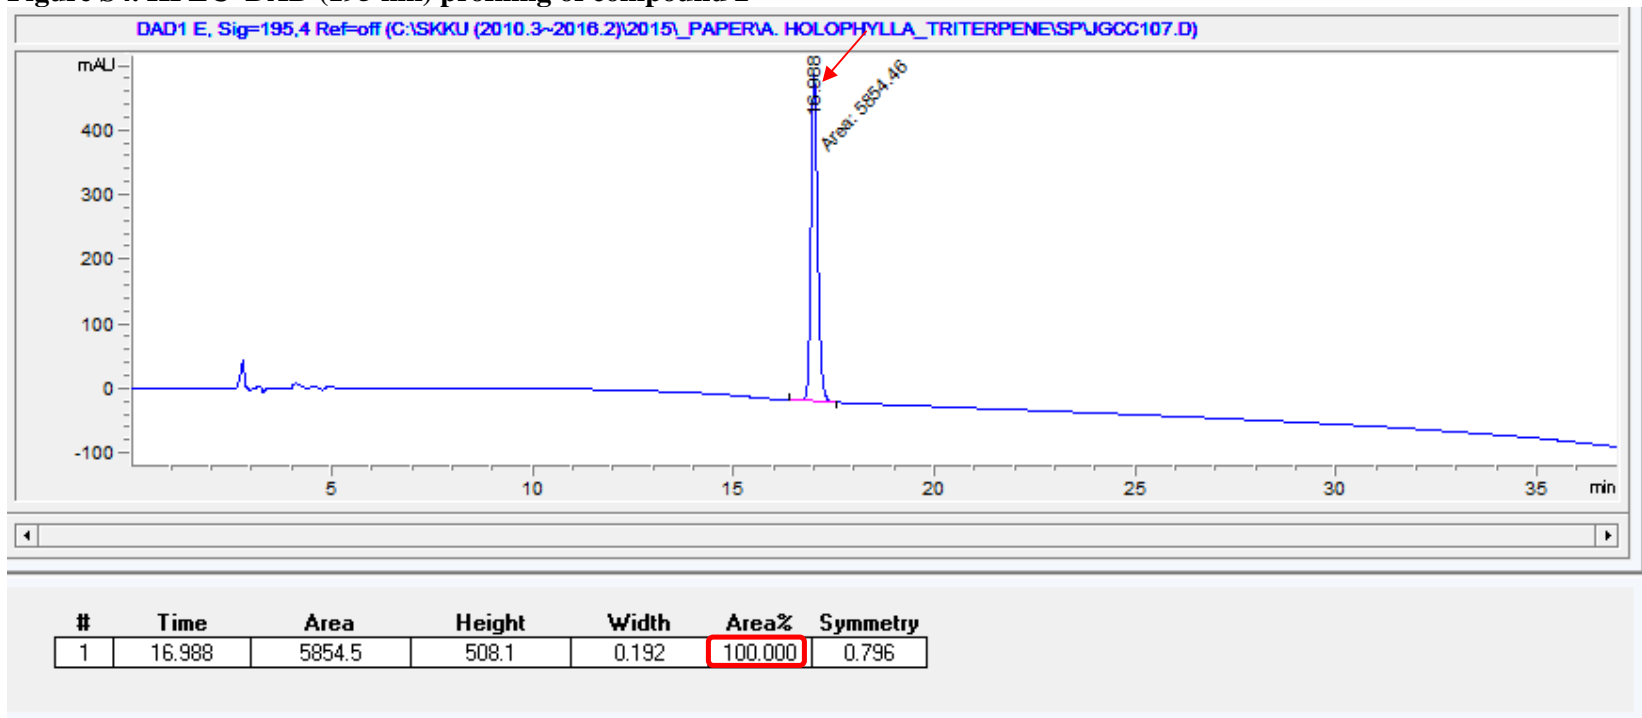

Purity of compound 2: >98%

**Figure S5. HRFABMS spectra of 1**

[ Mass Spectrum ]  
Data : HFRB-POS-132531227 Date : 31-May-2012 16:33  
Sample: JGCC 110  
Note : with NBF  
Inlet : Direct Ion Mode : FFB+  
Spectrum Type : Normal Ion (MF-Linear)  
RT : 3.28 min Scan# : 38  
BP : m/z 487.3528 Int. : 11.18  
Output m/z range : 551.0512 to 551.6326 Cut Level : 0.00 %

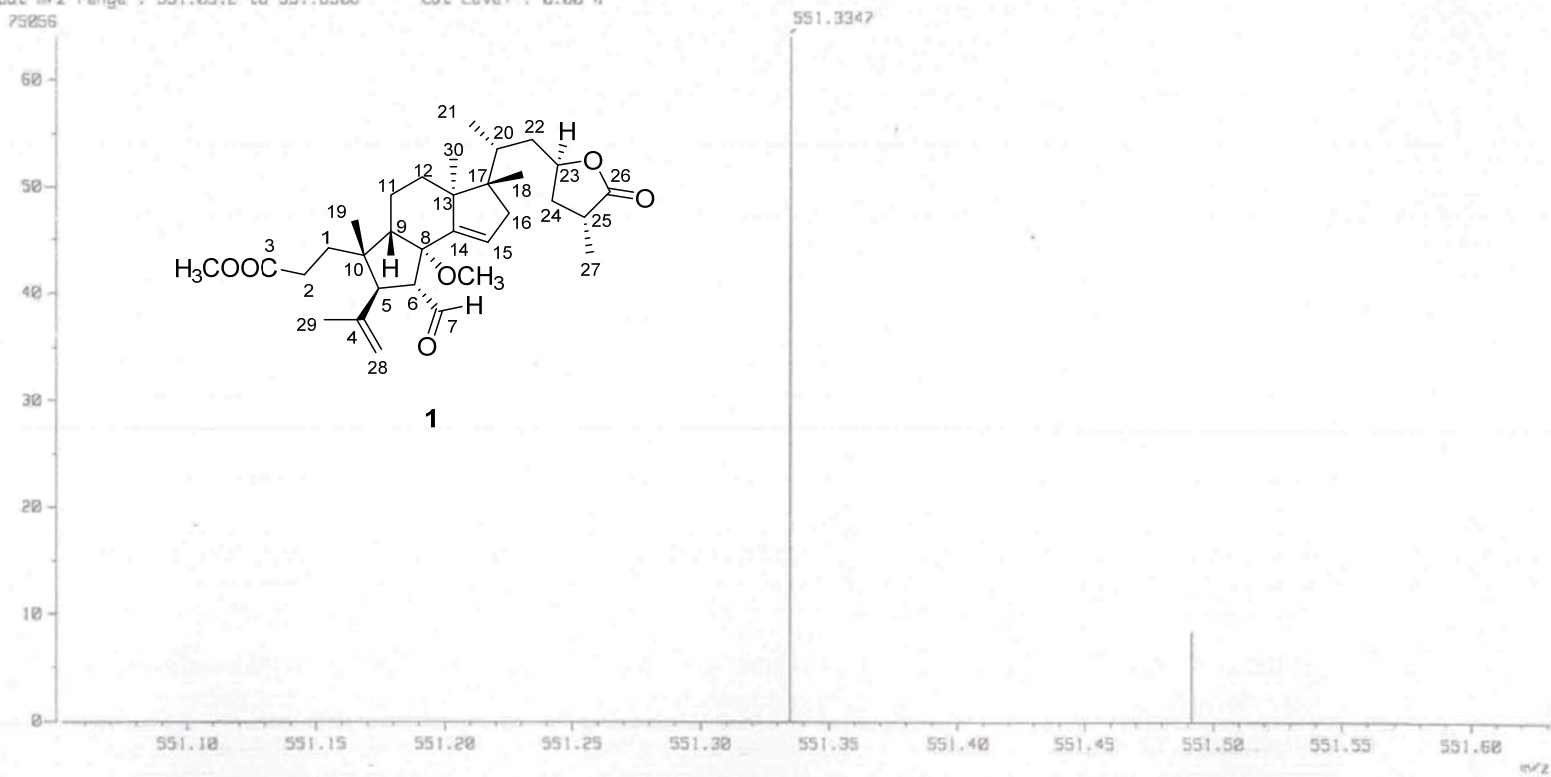

[ Mass Spectrum 1  
Data : FFB-POS-130531007 Date : 31-May-2013 16:33  
Sample: JCCC 110  
Note : with NBR  
Inlet : Direct Ion Mode : FFB+  
Spectrum Type : Normal Ion [MF-Linear]  
RT : 3.29 min Scan# : 38  
BP : m/z 497.3528 Int. : 11.18  
Output m/z range : 495.0000 to 645.0000 Cut Level : 0.00 %

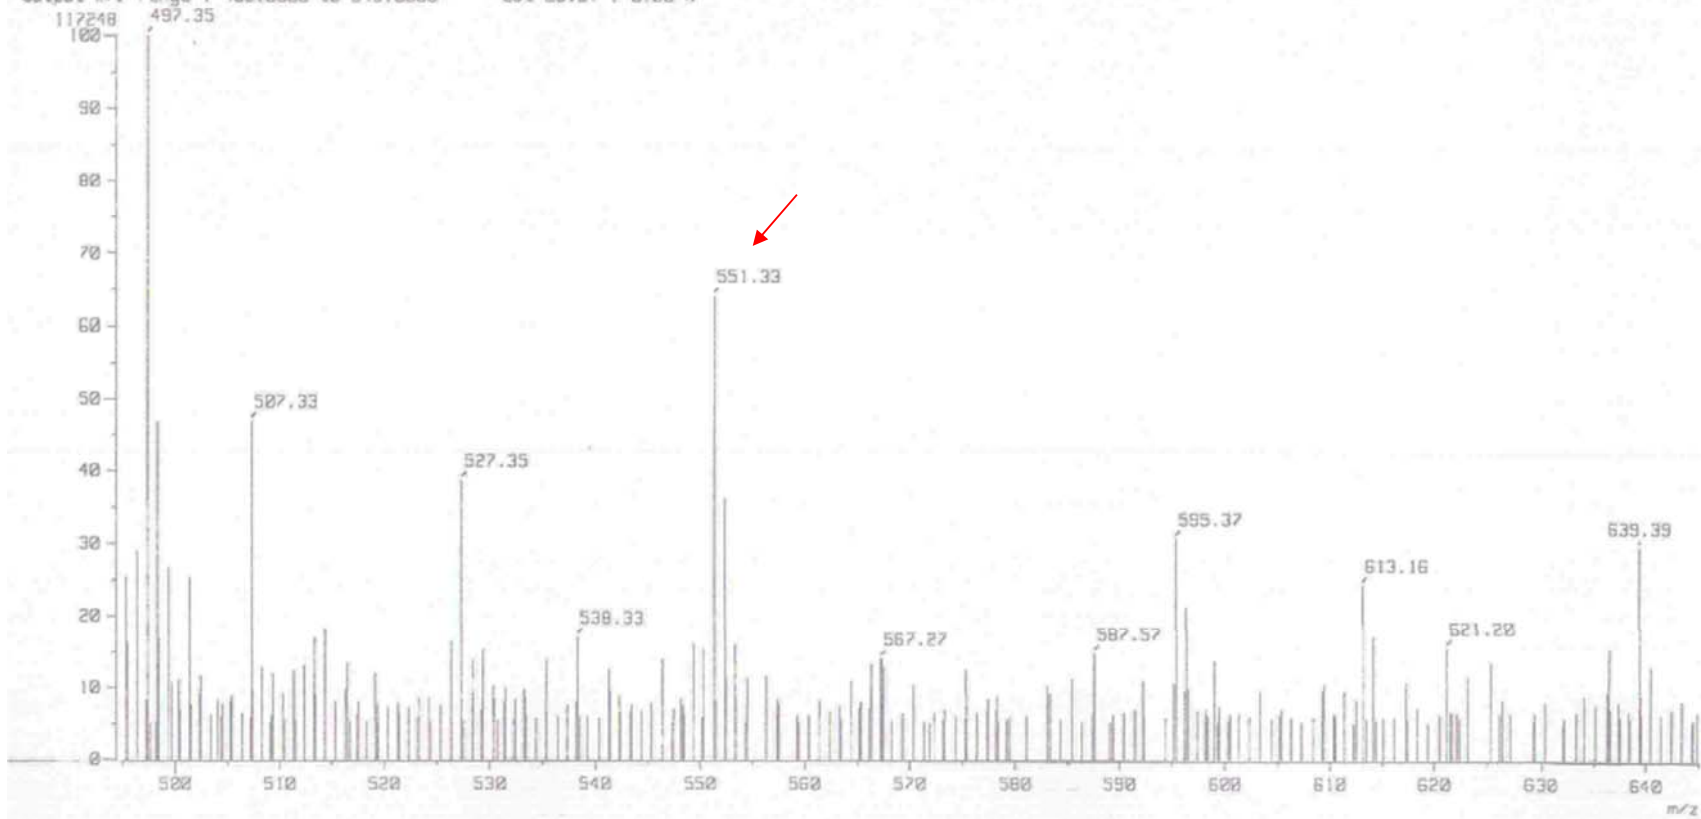



Figure S6. <sup>1</sup>H NMR spectrum of **1**

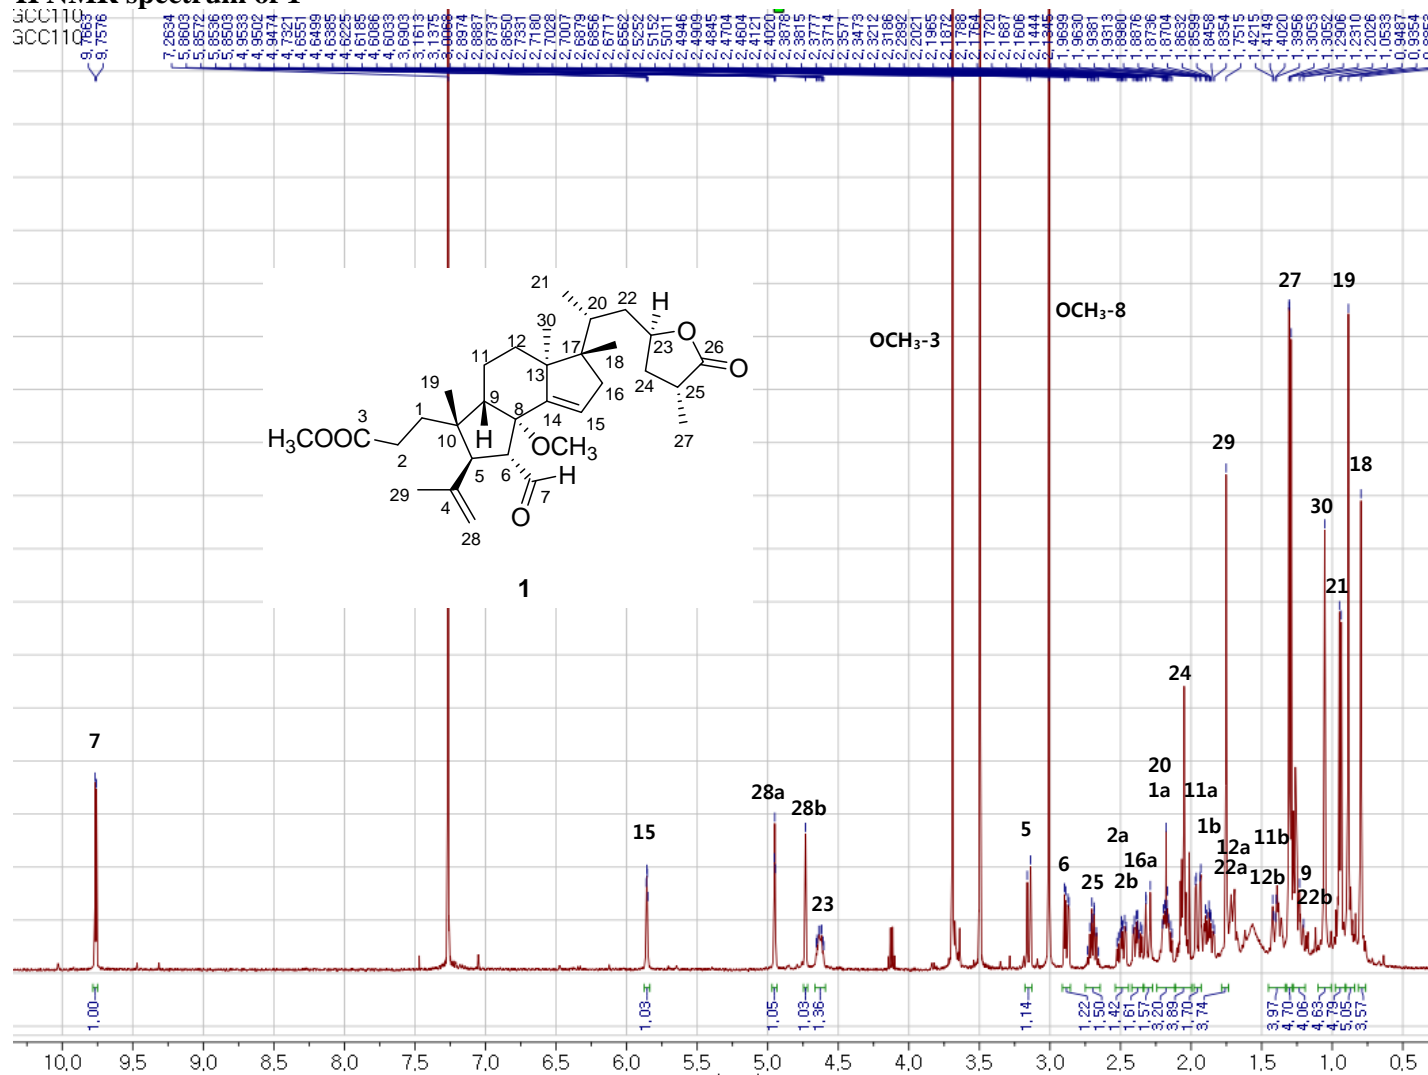

Figure S7. <sup>13</sup>C NMR spectrum of **1**

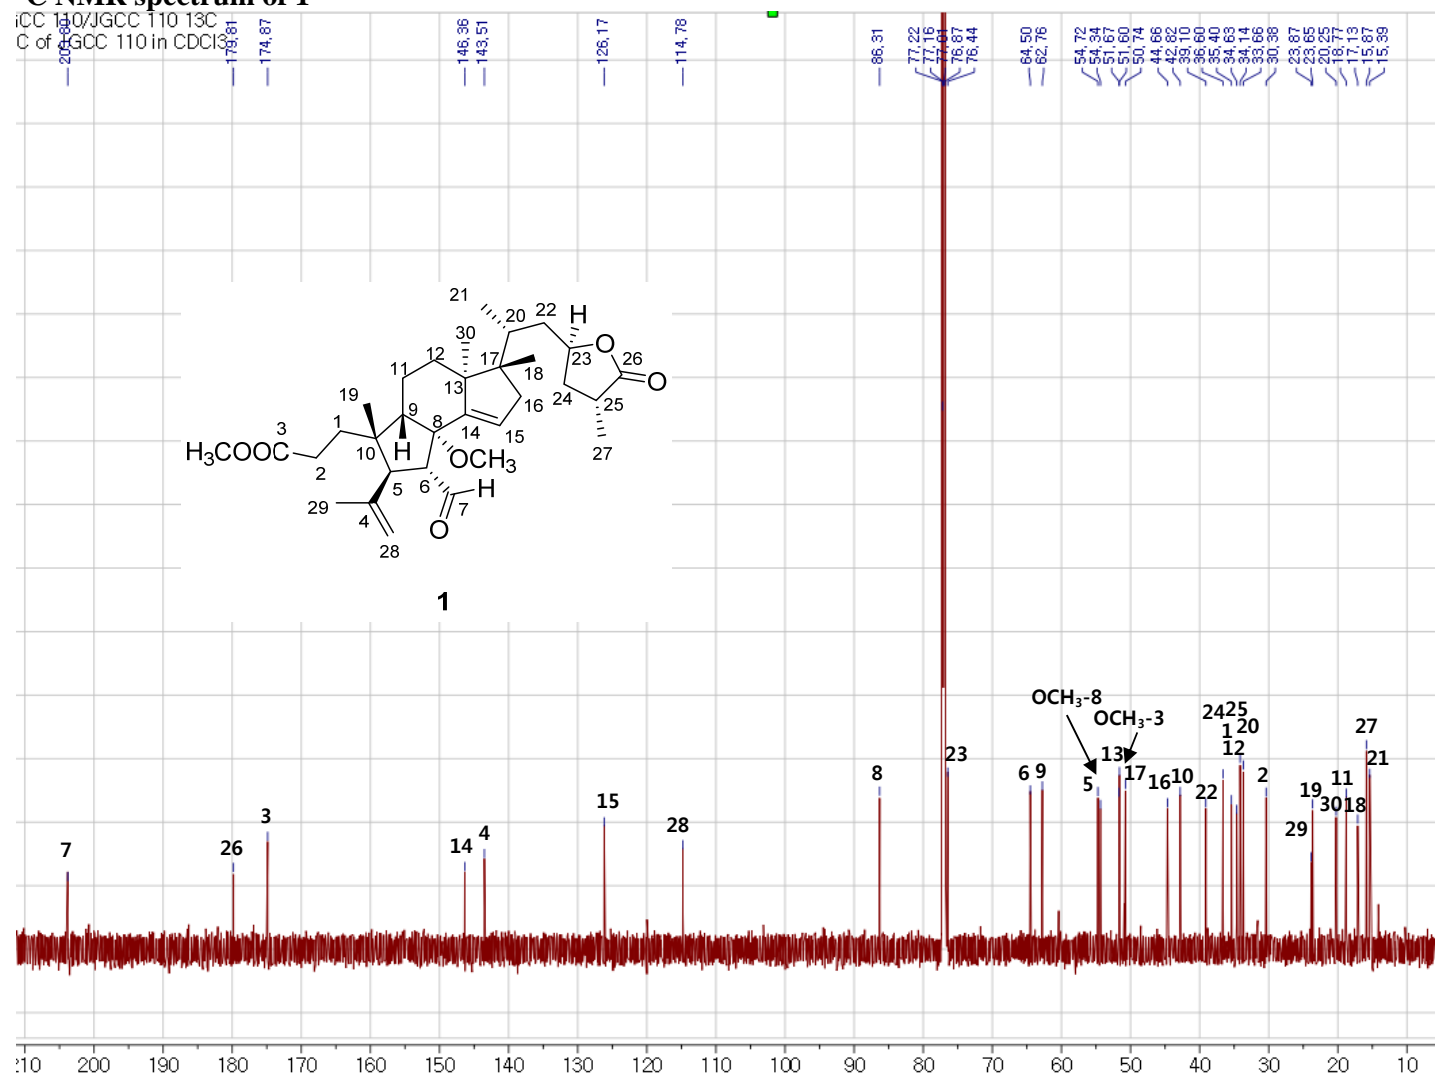

Figure S8. DEPT 90 spectrum of 1

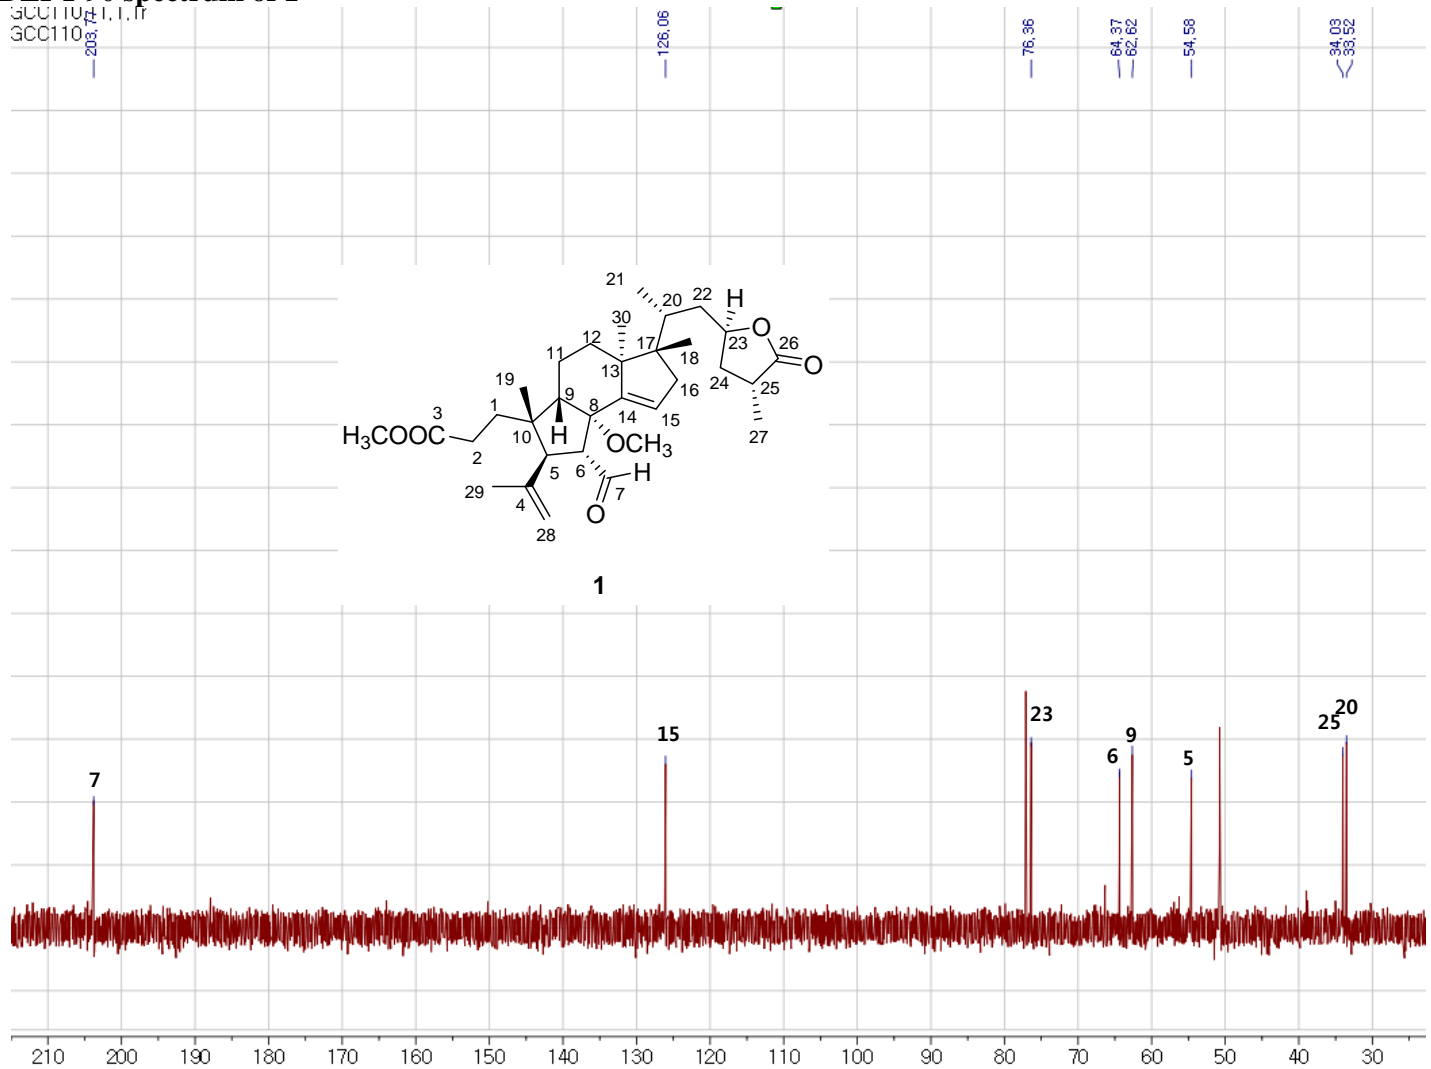

Figure S9. DEPT 135 spectrum of **1**

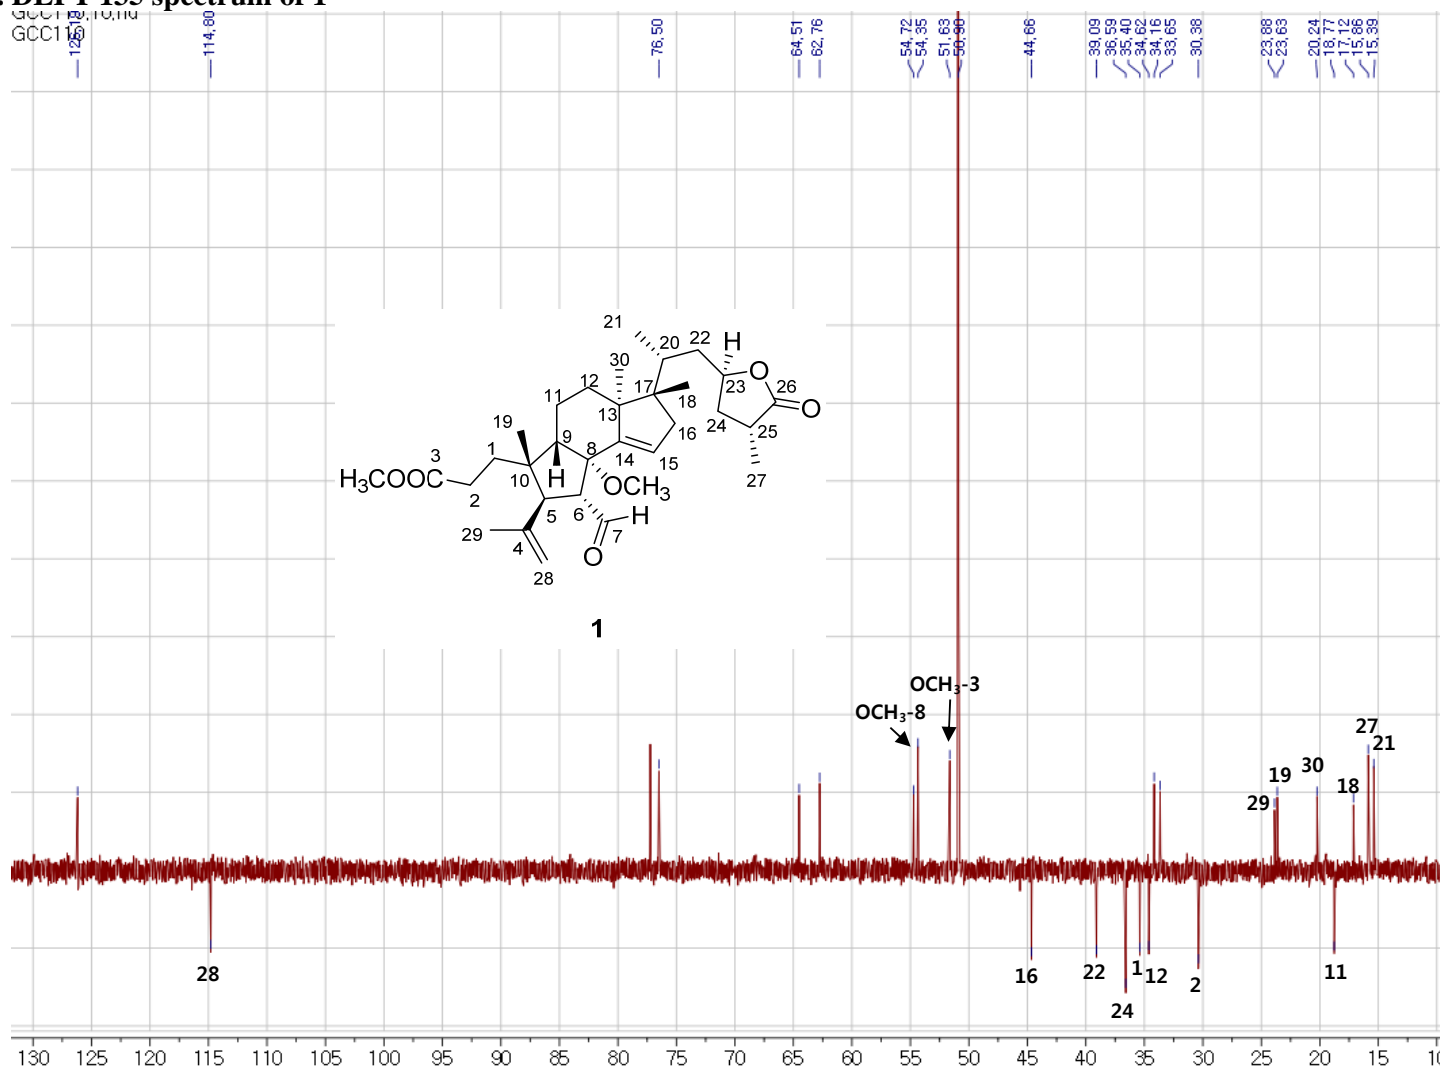

Figure S10. COSY spectrum of **1**

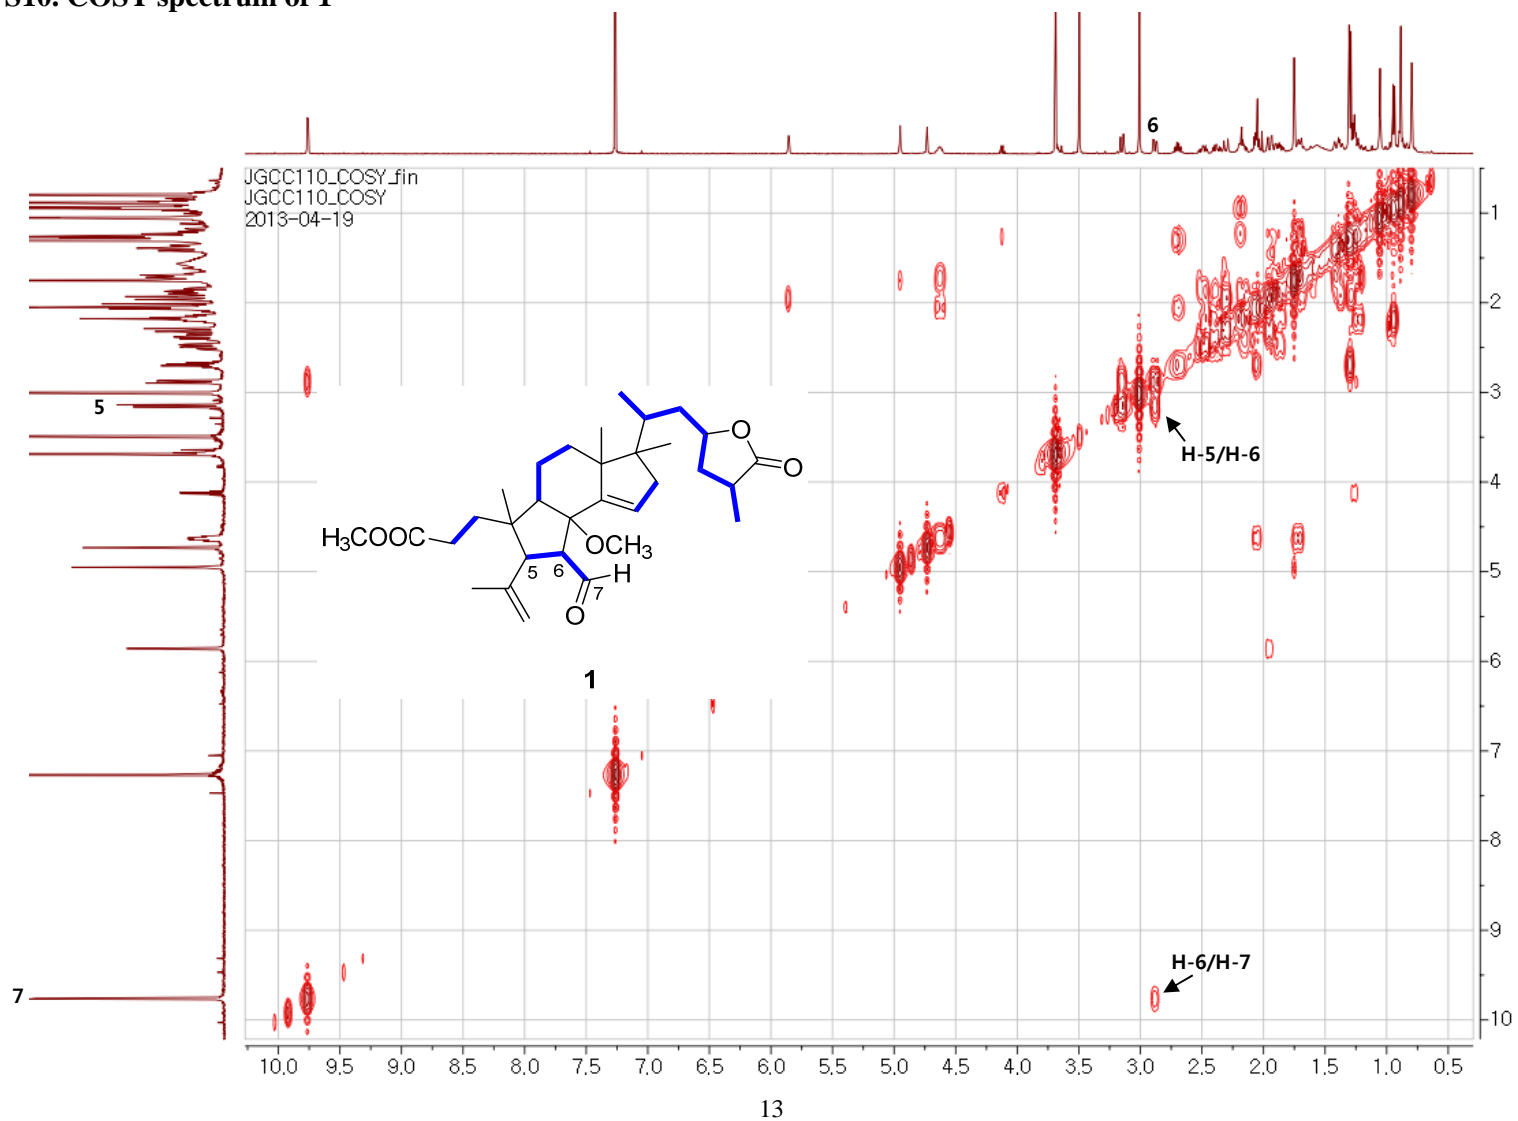

Figure S11. HSQC spectrum of **1**

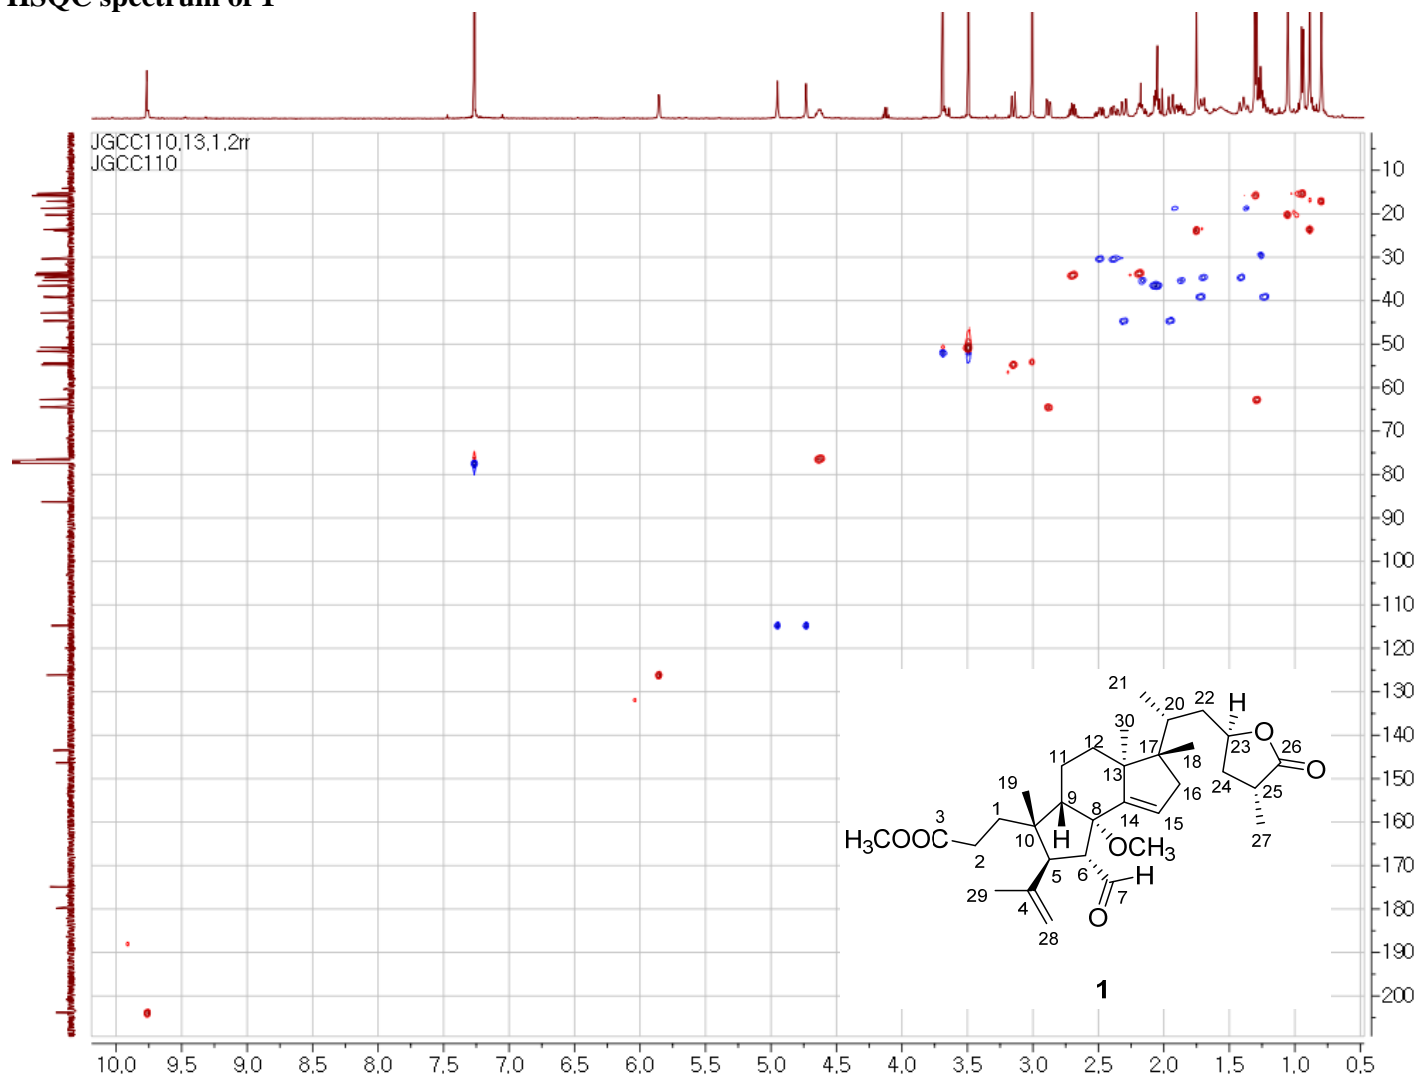

Figure S12. HMBC spectrum of **1**

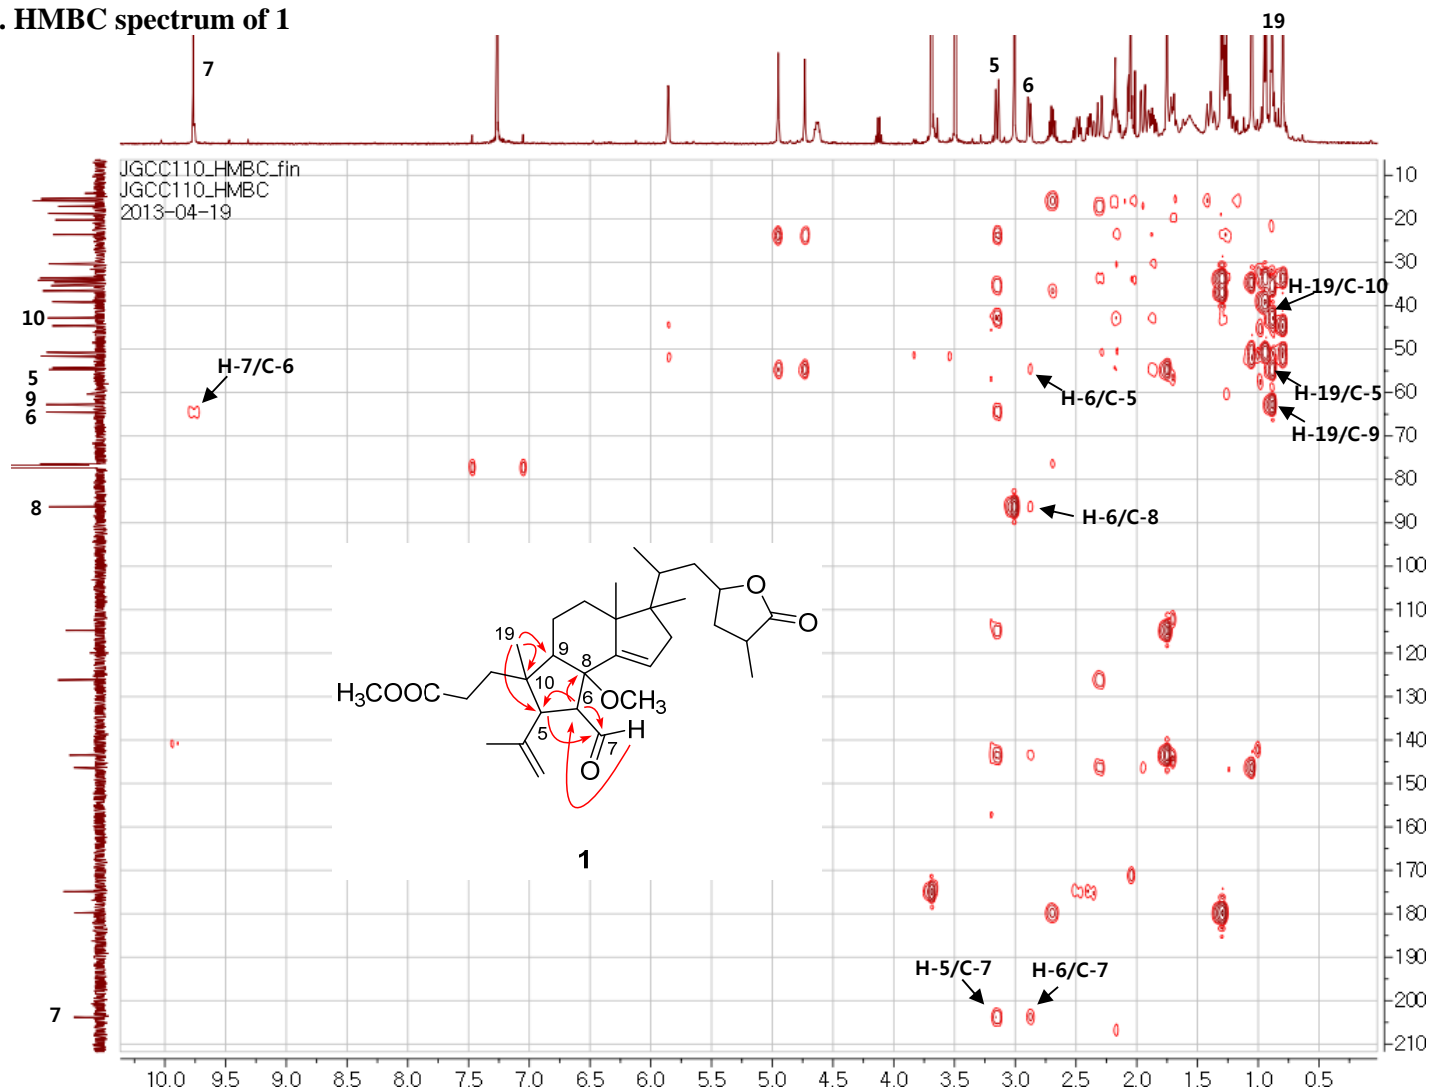

Figure S13. NOESY spectrum of **1**

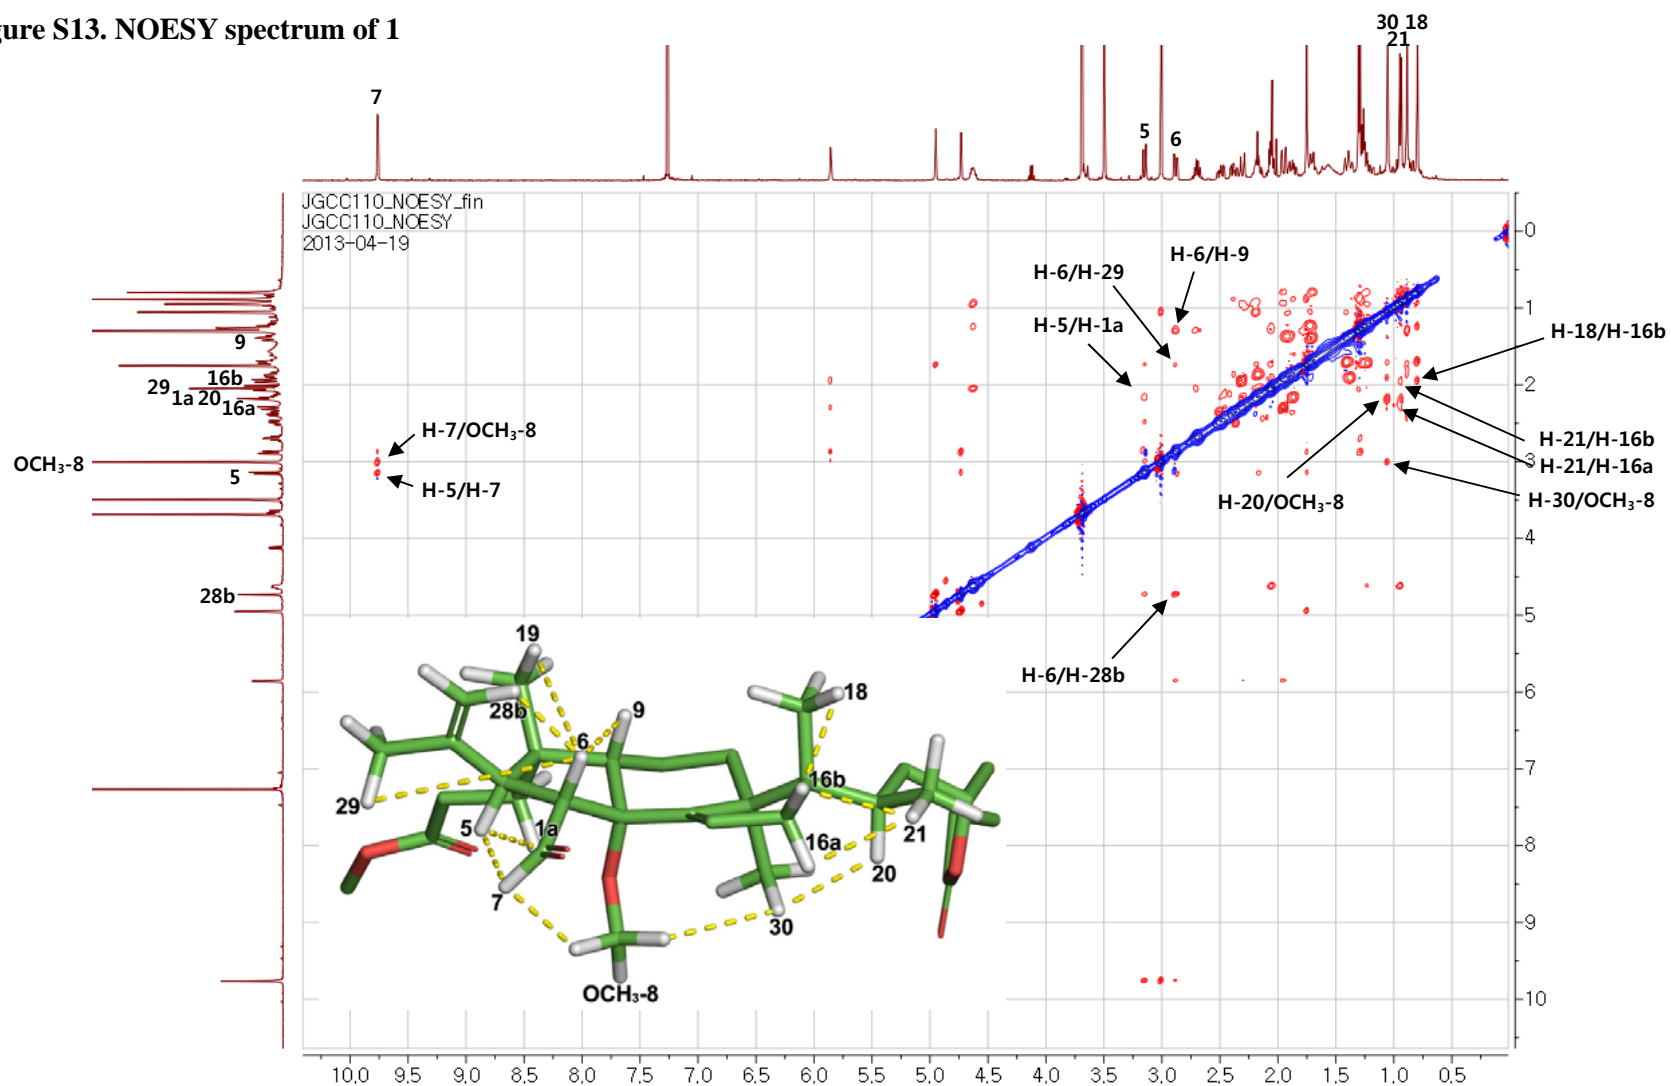



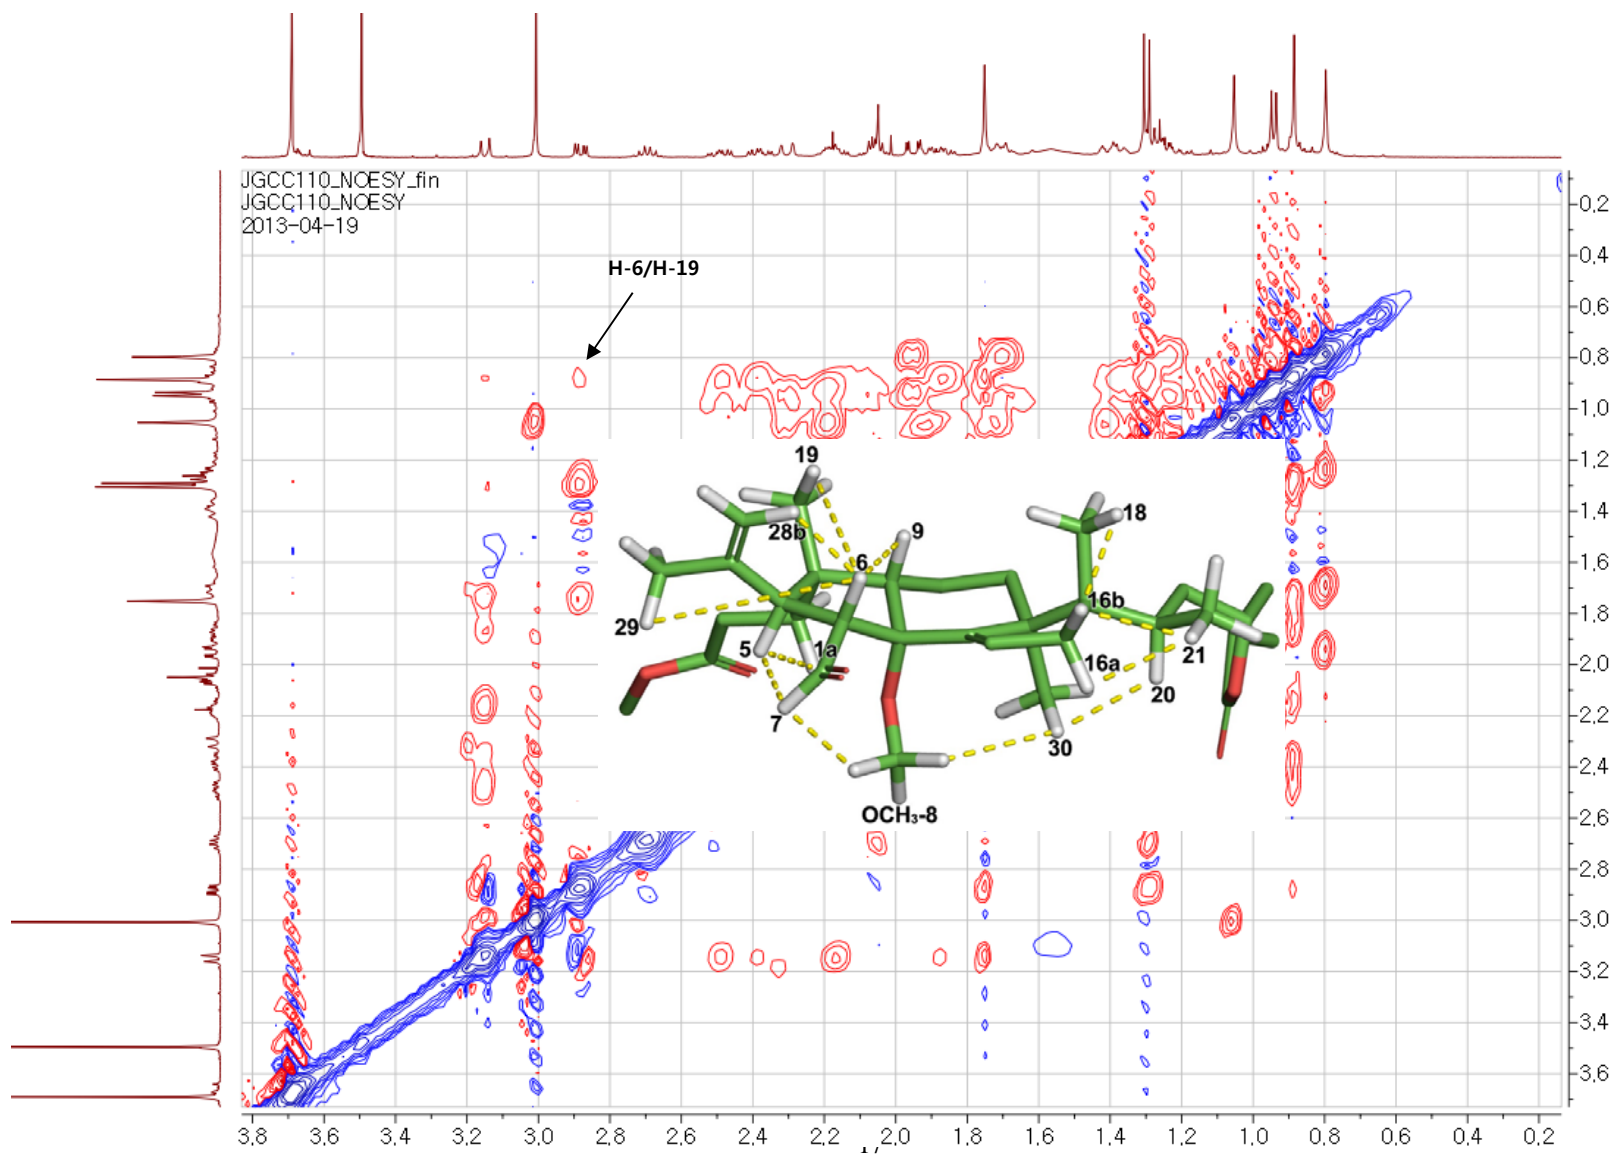

Figure S14. HRFABMS spectra of 2

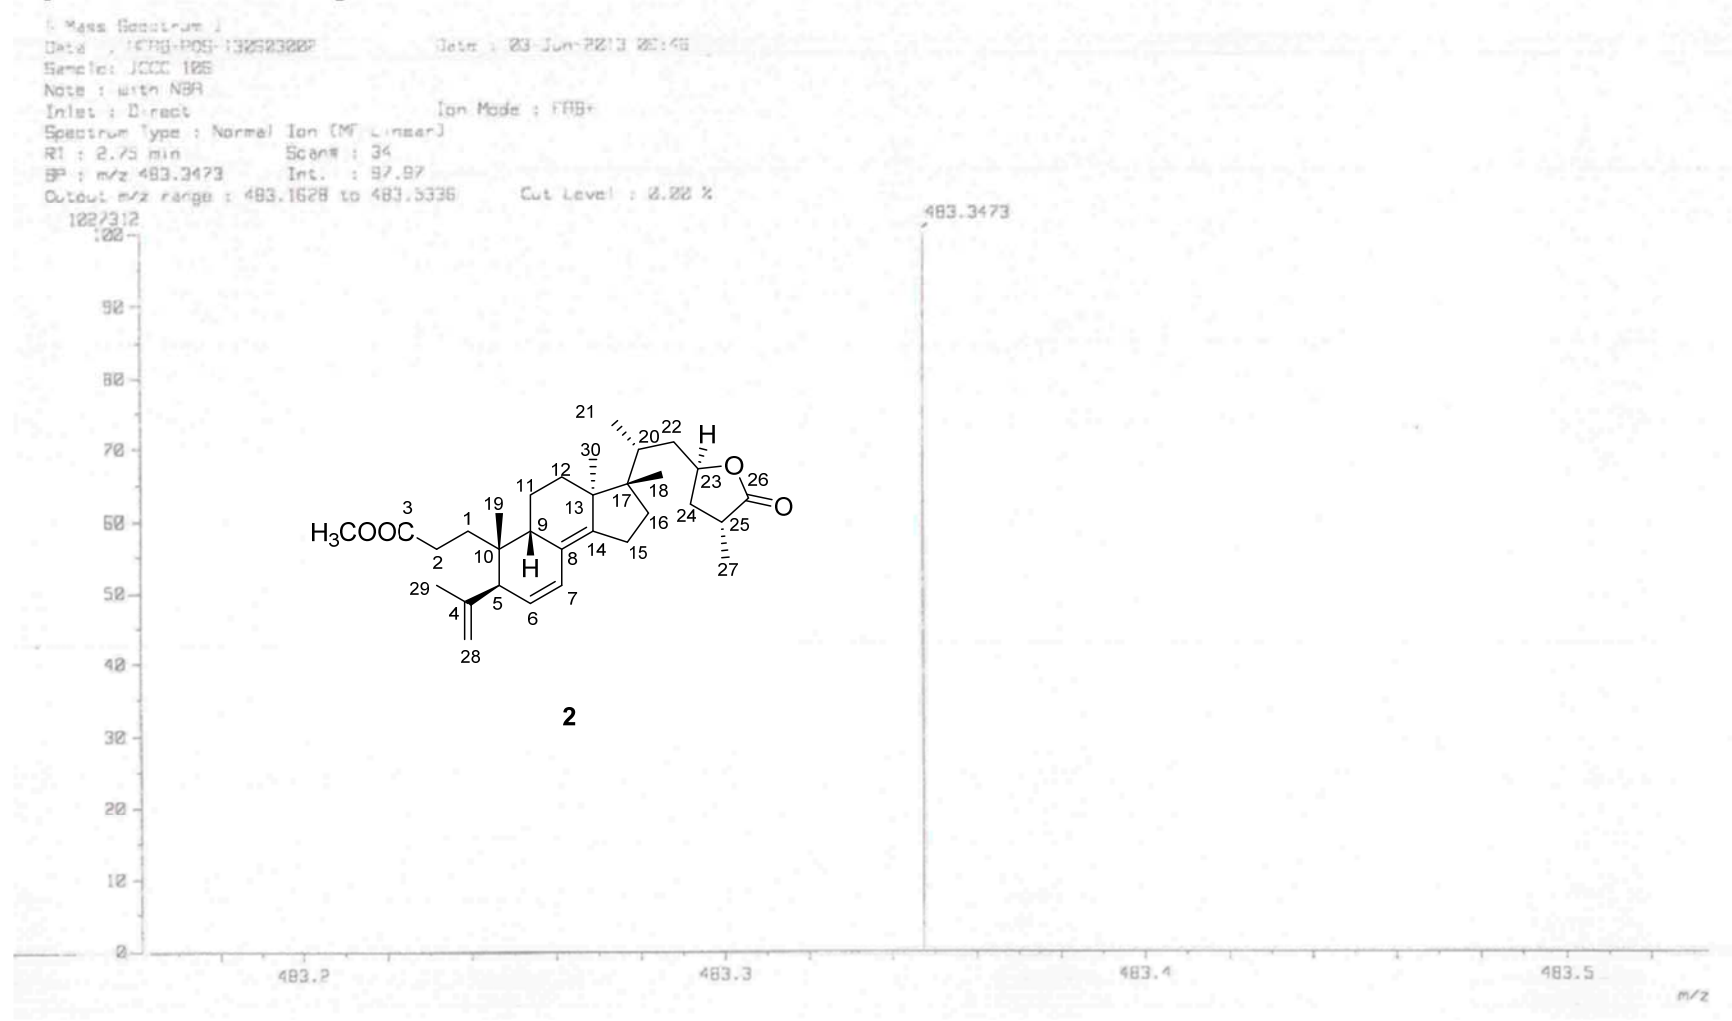

Mass Spectrum  
Data : LFRQ-POS-132531002 Date : 31-May-2013 15:59  
Sample: JGCC 106  
Note : with NBP  
Inlet : Direct Ion Mode : FBE+  
Spectrum Type : Normal Ion (M-Linear)  
RT : 0.67 min Scan# : 6  
BP : m/z 154.1078 Int. : 15.70  
Output m/z range : 100.0000 to 1500.0000 Cut Level : 0.00 %

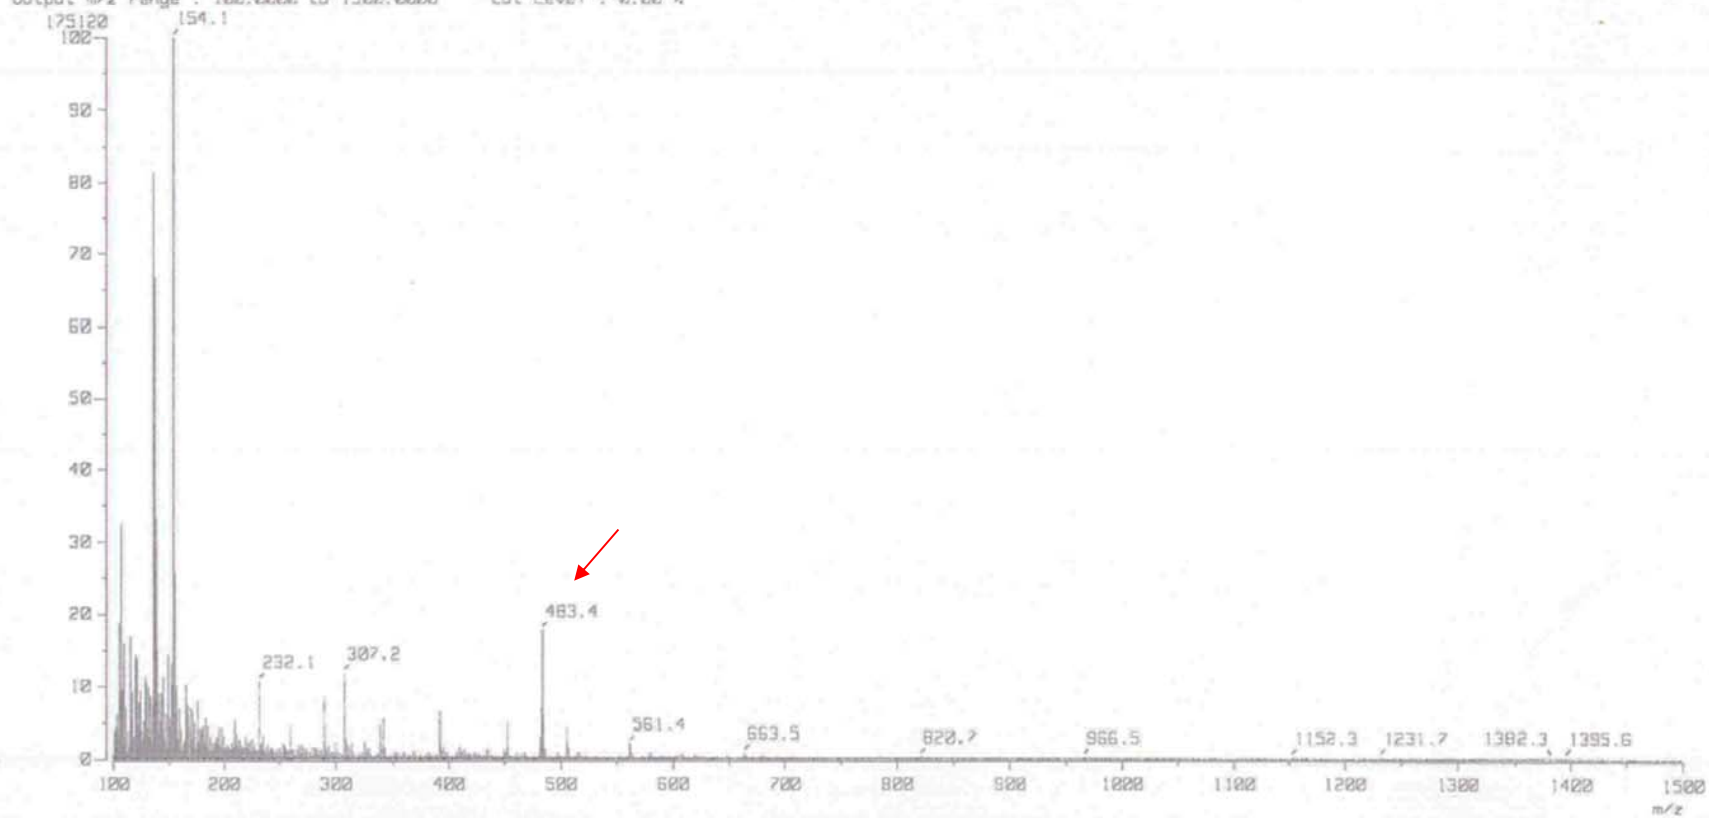

Figure S15. <sup>1</sup>H NMR spectrum of **2**

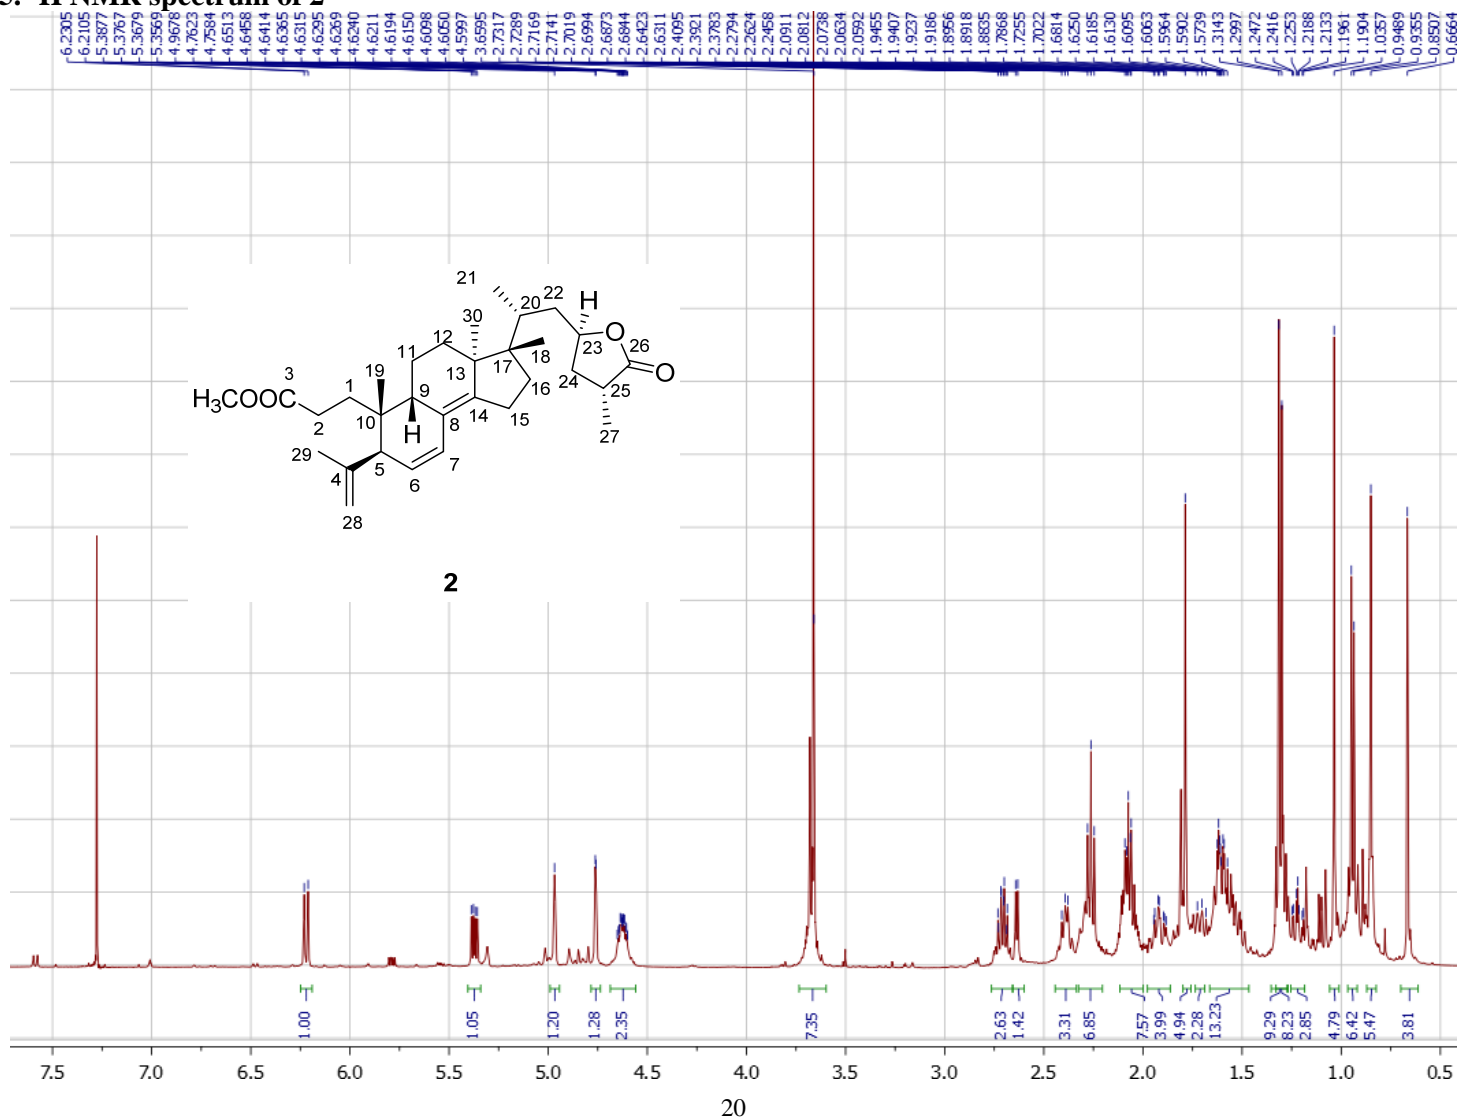

Figure S16. <sup>13</sup>C NMR spectrum of **2**

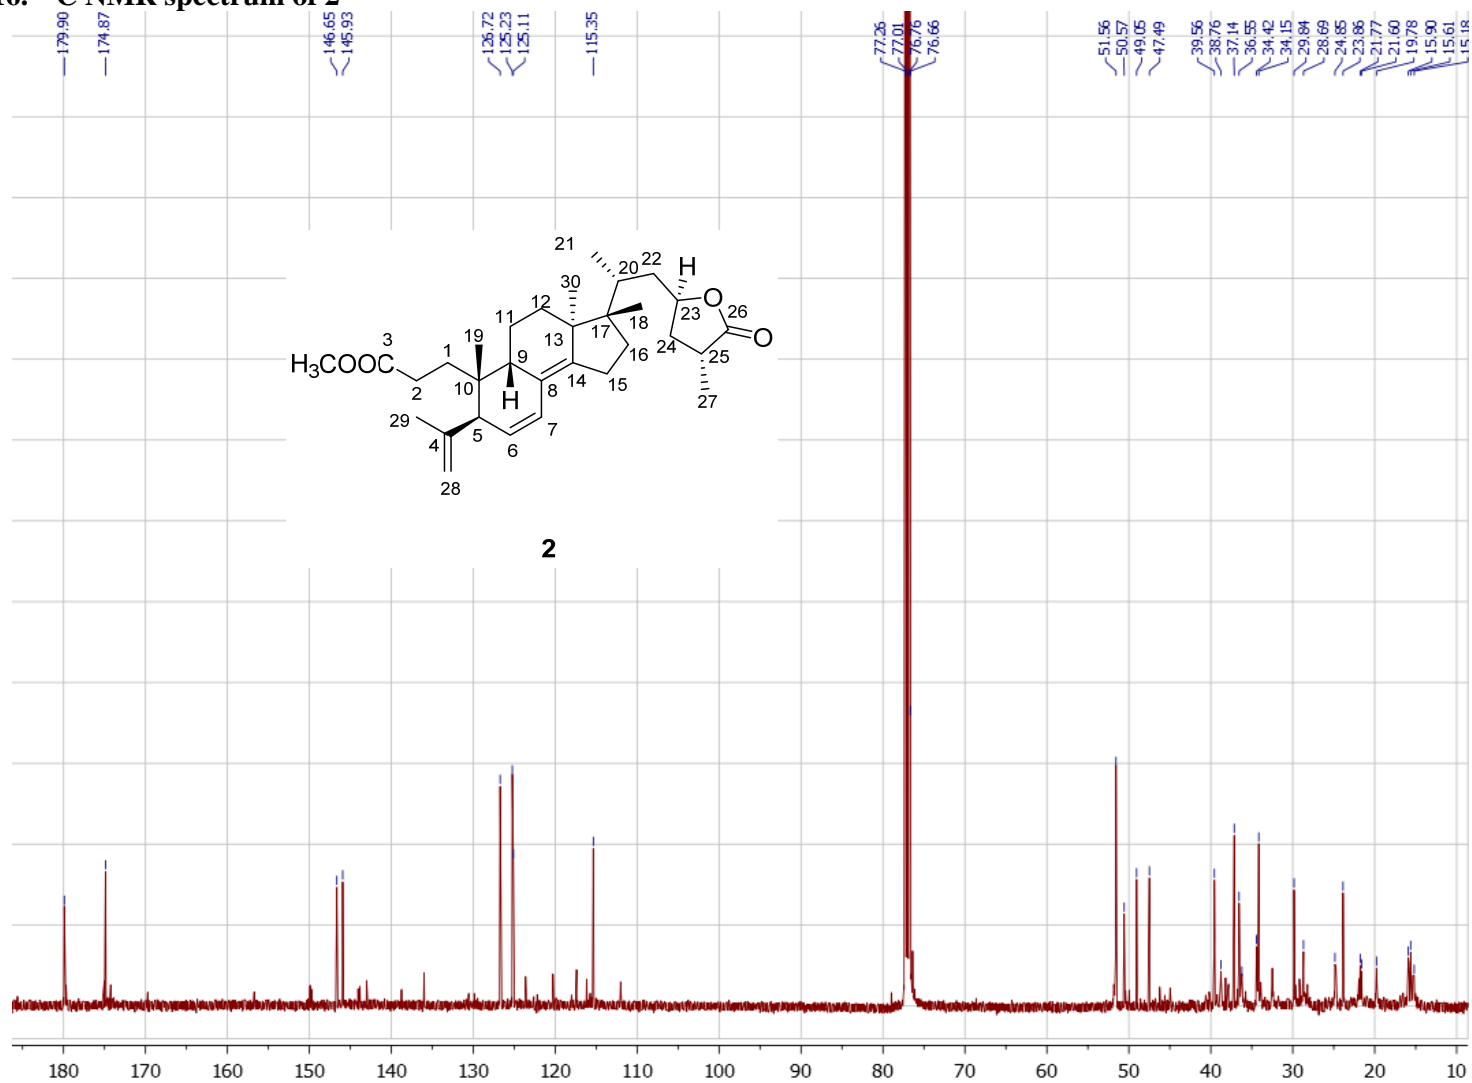

Figure S17. COSY spectrum of 2

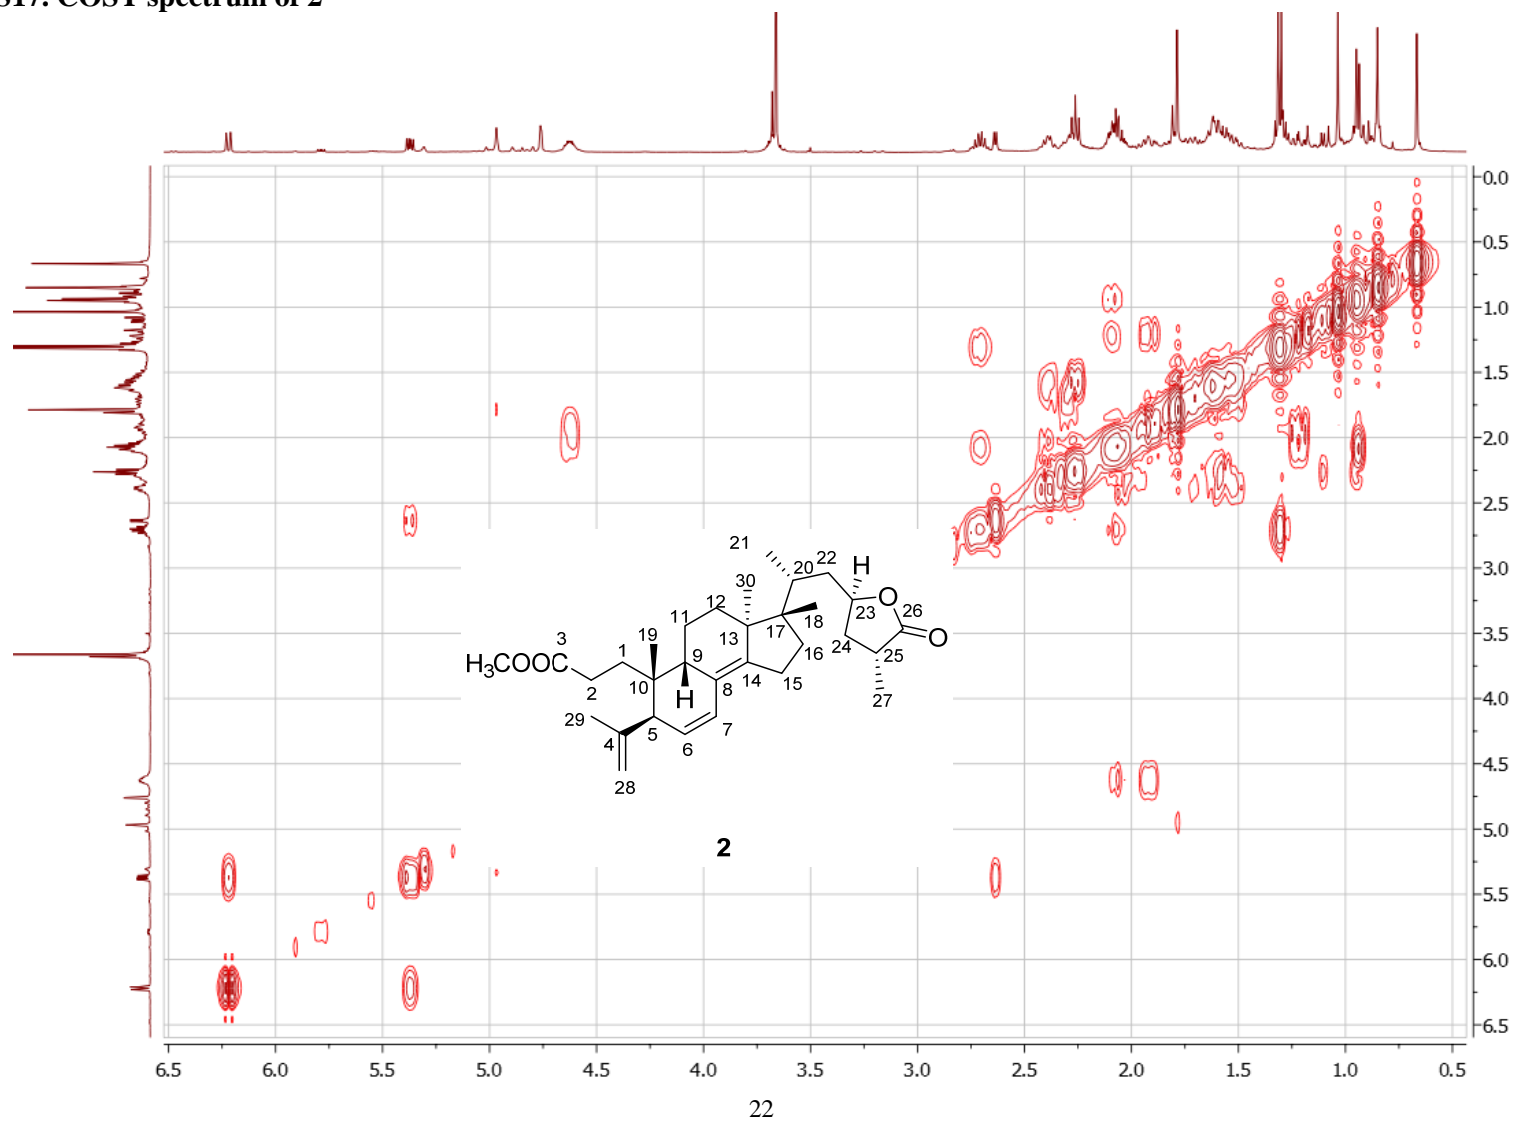

Figure S18. HSQC spectrum of **2**

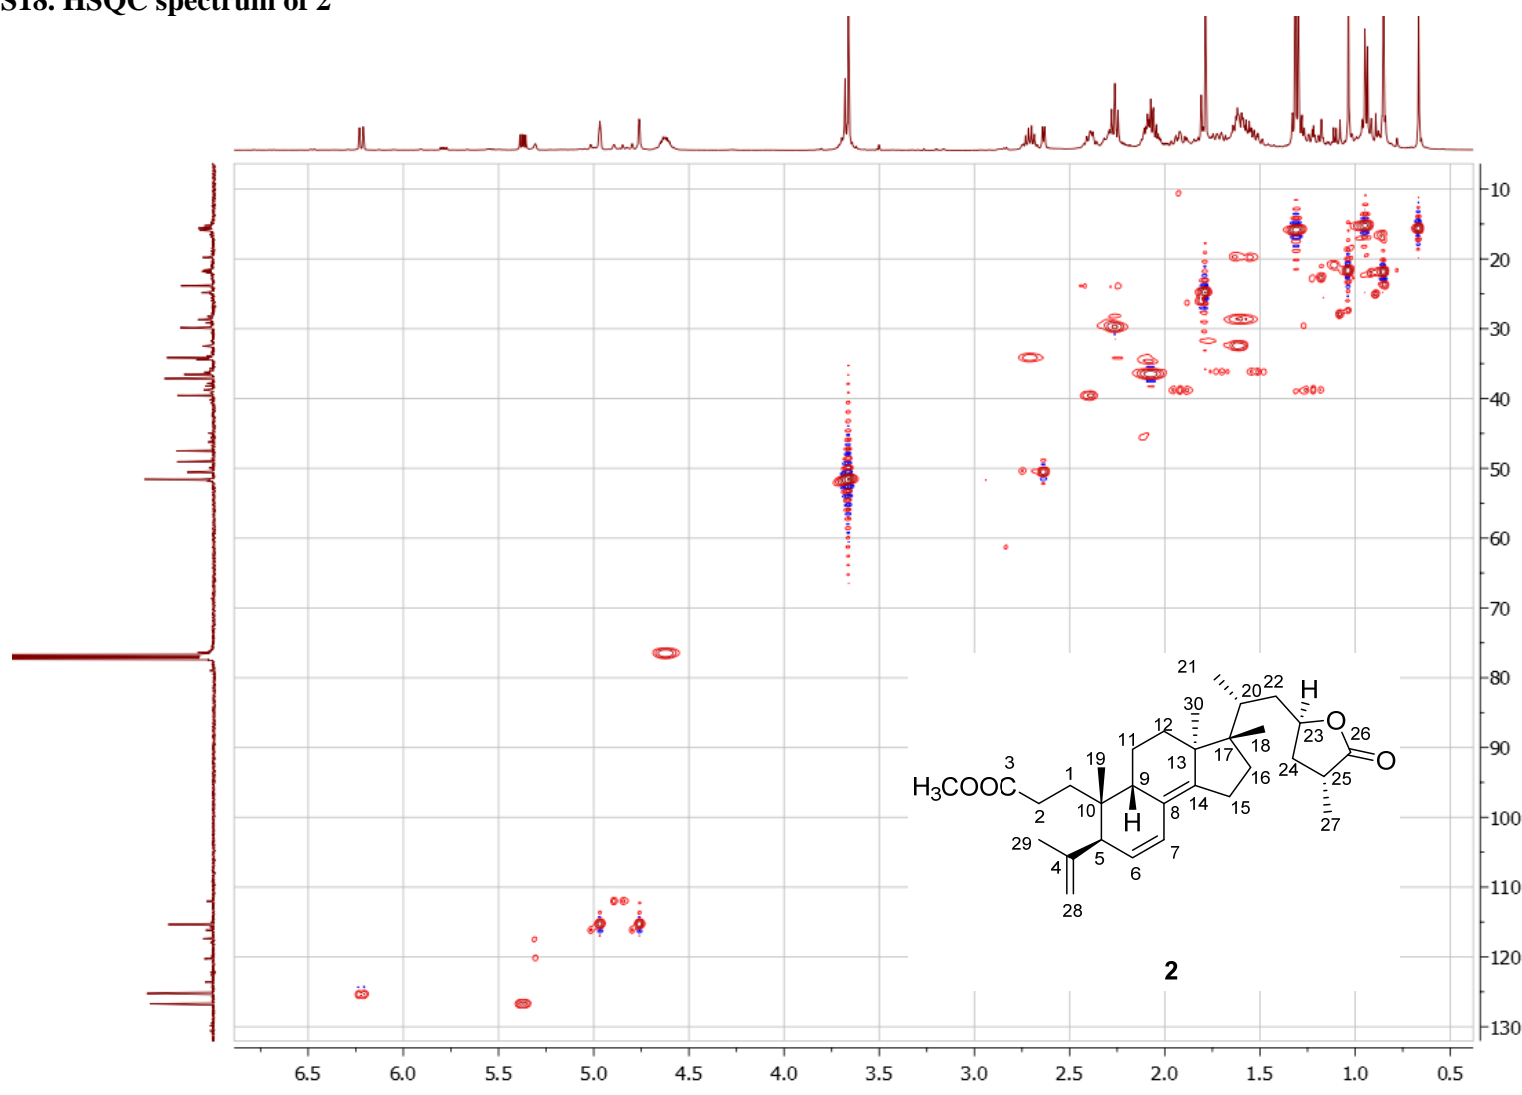

Figure S19. HMBC spectrum of **2**

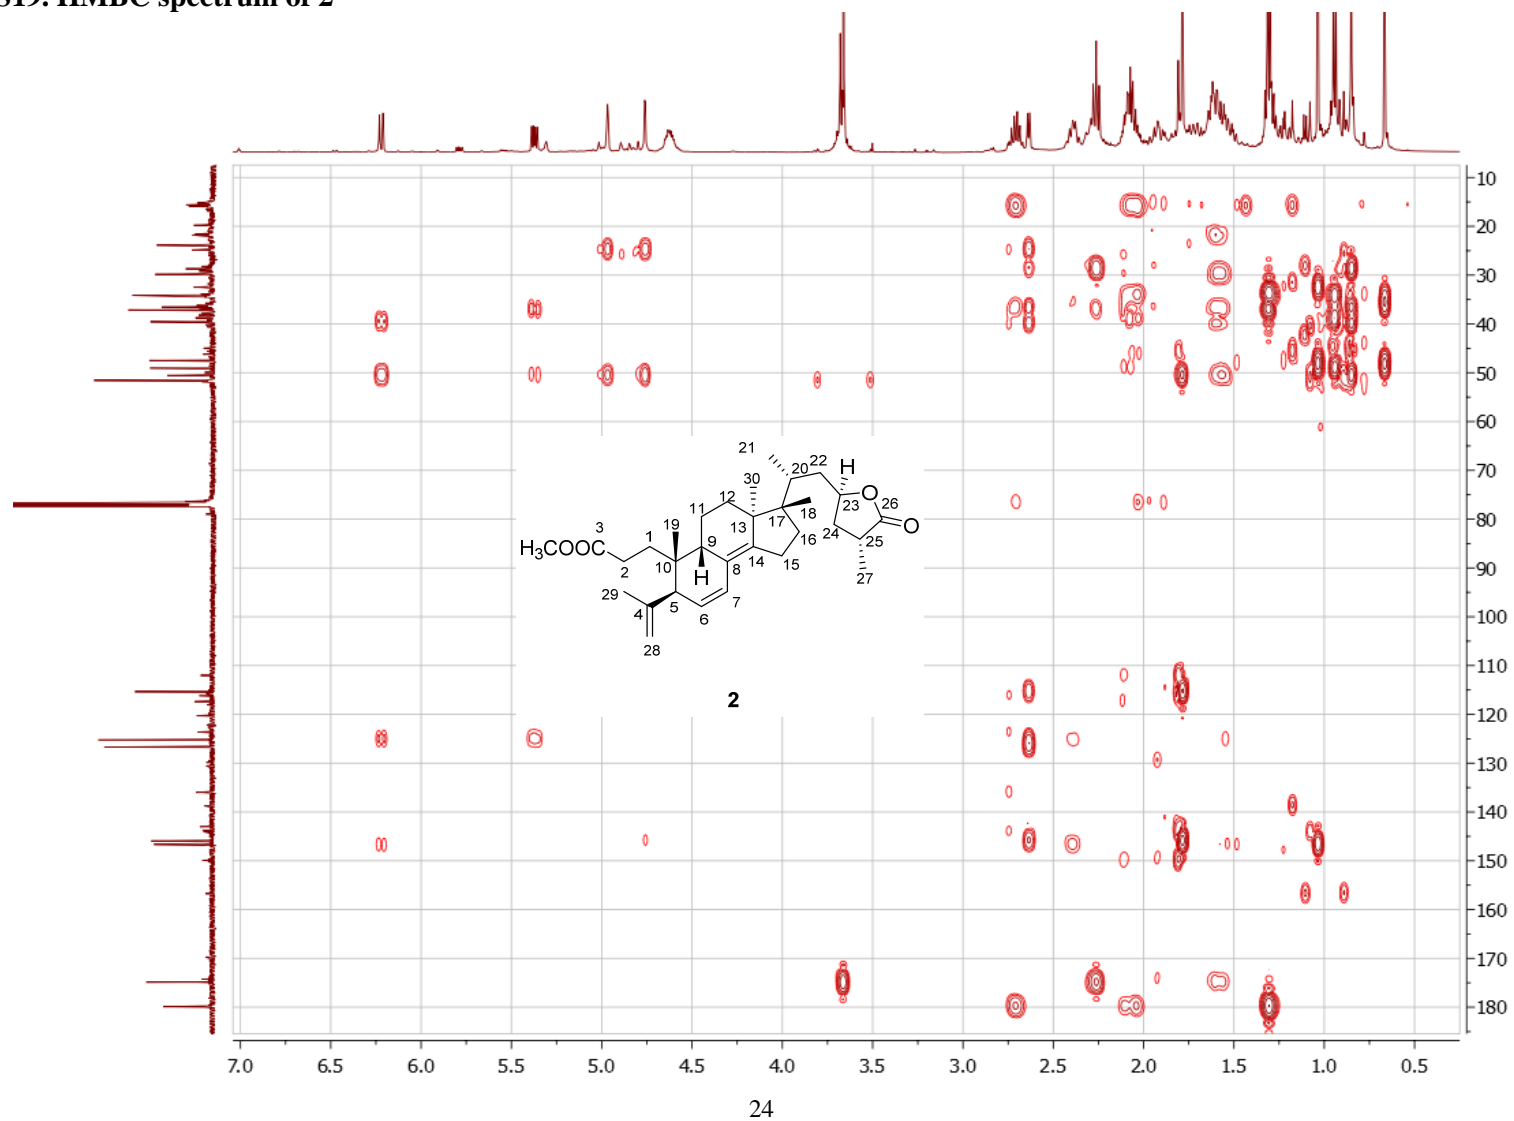



Figure S20. NOESY spectrum of **2**

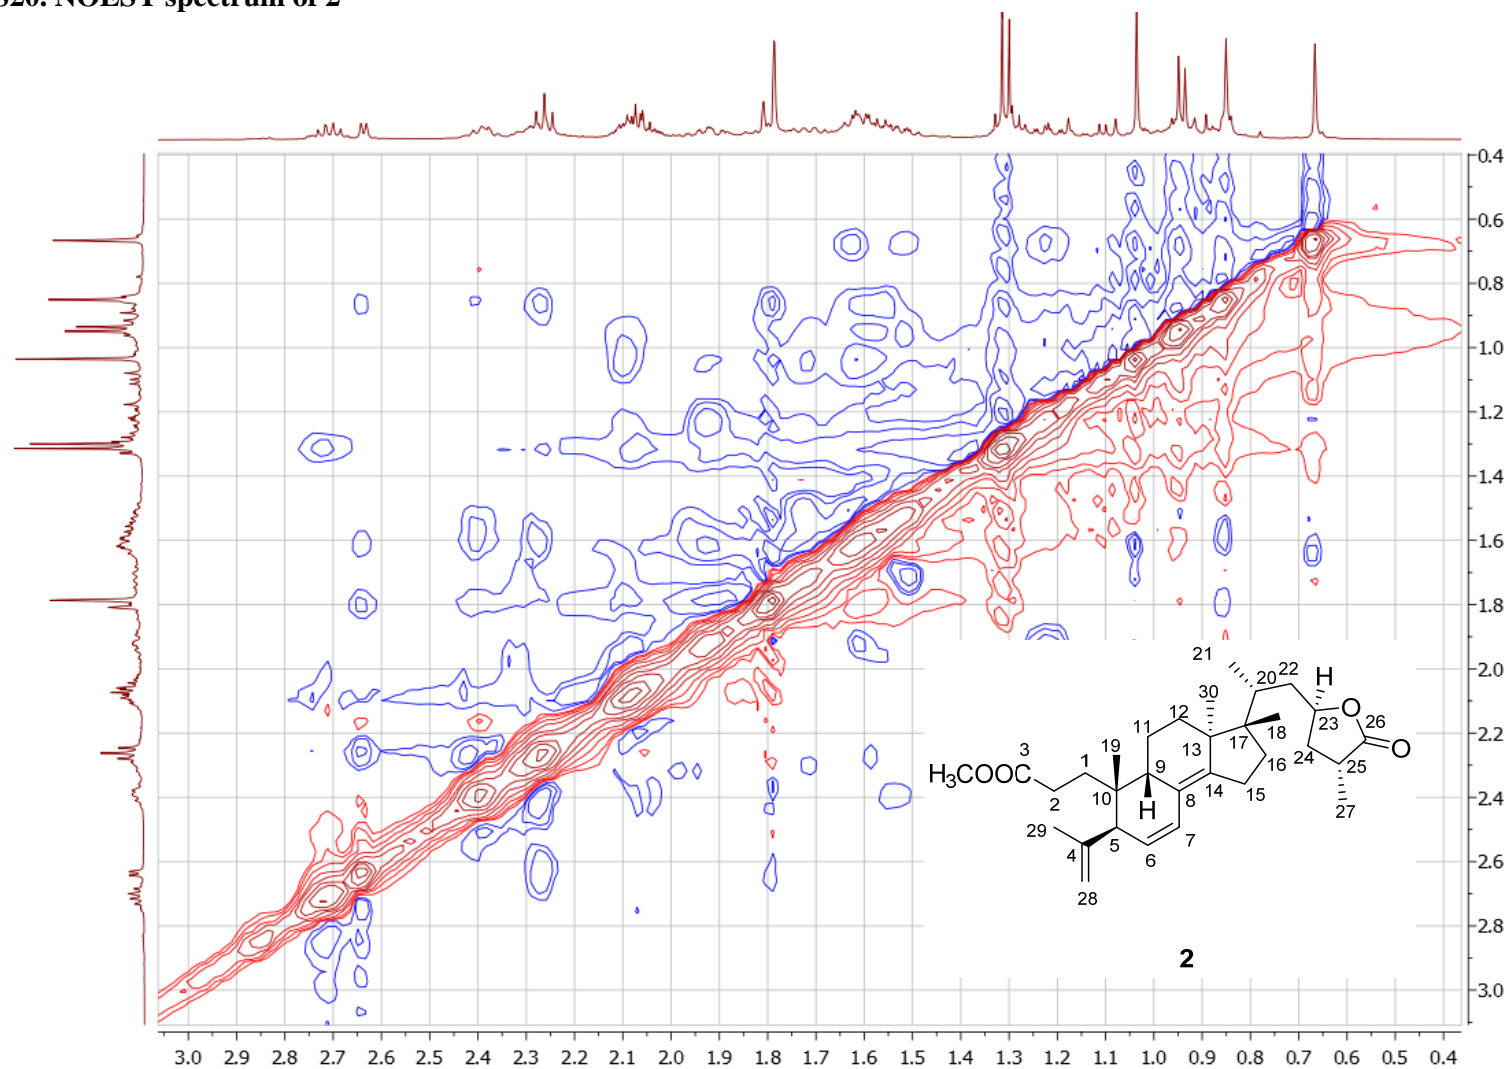

**Table S1. Computed thermodynamic data and zero-point vibrational energy of conformers of 1 (PCM, CHCl<sub>3</sub>) used for chemical shift values and ECD simulation (B3LYP/6-31+(d,p))**

| Conformer | E <sub>zpe</sub> | U            | H            | G            |
|-----------|------------------|--------------|--------------|--------------|
| 1         | -1698.994501     | -1698.953878 | -1698.952934 | -1699.070035 |
| 2         | -1698.99481      | -1698.954304 | -1698.95336  | -1699.069267 |
| 3         | -1698.994004     | -1698.953515 | -1698.95257  | -1699.068612 |
| 4         | -1698.993721     | -1698.953367 | -1698.952422 | -1699.067488 |
| 5         | -1698.993743     | -1698.953287 | -1698.952343 | -1699.068117 |
| 6         | -1698.99481      | -1698.954304 | -1698.95336  | -1699.069266 |
| 7         | -1698.993078     | -1698.952547 | -1698.951603 | -1699.067593 |
| 8         | -1698.994546     | -1698.954063 | -1698.953119 | -1699.069311 |
| 9         | -1698.9942       | -1698.953798 | -1698.952854 | -1699.068609 |
| 10        | -1698.994004     | -1698.953515 | -1698.952571 | -1699.068606 |
| 11        | -1698.993982     | -1698.95355  | -1698.952606 | -1699.068543 |
| 12        | -1698.993767     | -1698.953294 | -1698.95235  | -1699.068211 |
| 13        | -1698.993741     | -1698.953287 | -1698.952342 | -1699.068091 |
| 14        | -1698.993721     | -1698.953367 | -1698.952422 | -1699.067489 |
| 15        | -1698.994313     | -1698.953751 | -1698.952807 | -1699.069012 |
| 16        | -1698.993599     | -1698.953133 | -1698.952189 | -1699.067913 |
| 17        | -1698.994771     | -1698.954274 | -1698.95333  | -1699.068961 |
| 18        | -1698.993763     | -1698.953401 | -1698.952457 | -1699.067138 |
| 19        | -1698.994017     | -1698.953514 | -1698.95257  | -1699.068669 |
| 20        | -1698.993765     | -1698.95326  | -1698.952316 | -1699.068196 |
| 21        | -1698.993474     | -1698.952937 | -1698.951993 | -1699.068435 |
| 22        | -1698.994771     | -1698.954274 | -1698.95333  | -1699.068961 |
| 23        | -1698.991266     | -1698.950749 | -1698.949804 | -1699.065602 |
| 24        | -1698.993078     | -1698.952547 | -1698.951603 | -1699.067593 |
| 25        | -1698.994527     | -1698.954042 | -1698.953097 | -1699.068907 |
| 26        | -1698.993956     | -1698.953532 | -1698.952588 | -1699.068013 |
| 27        | -1698.993047     | -1698.952516 | -1698.951571 | -1699.067424 |
| 28        | -1698.993982     | -1698.95355  | -1698.952606 | -1699.068543 |
| 29        | -1698.994293     | -1698.953812 | -1698.952868 | -1699.068594 |
| 30        | -1698.991823     | -1698.951509 | -1698.950565 | -1699.065316 |
| 31        | -1698.993743     | -1698.953287 | -1698.952343 | -1699.068118 |
| 32        | -1698.992099     | -1698.951788 | -1698.950844 | -1699.065945 |
| 33        | -1698.99376      | -1698.953264 | -1698.95232  | -1699.067787 |
| 34        | -1698.993112     | -1698.952613 | -1698.951668 | -1699.067413 |
| 35        | -1698.993763     | -1698.953401 | -1698.952457 | -1699.067137 |
| 36        | -1698.993577     | -1698.953079 | -1698.952134 | -1699.067519 |
| 37        | -1698.994546     | -1698.954063 | -1698.953119 | -1699.069312 |
| 38        | -1698.993537     | -1698.952932 | -1698.951988 | -1699.068444 |
| 39        | -1698.993743     | -1698.953287 | -1698.952343 | -1699.06812  |
| 40        | -1698.993868     | -1698.953213 | -1698.952268 | -1699.068652 |
| 41        | -1698.991223     | -1698.950778 | -1698.949833 | -1699.065069 |

|    |              |              |              |              |
|----|--------------|--------------|--------------|--------------|
| 42 | -1698.991397 | -1698.951115 | -1698.950171 | -1699.064753 |
| 43 | -1698.991881 | -1698.951496 | -1698.950551 | -1699.065722 |
| 44 | -1698.989261 | -1698.948951 | -1698.948007 | -1699.062882 |
| 45 | -1698.993956 | -1698.953532 | -1698.952588 | -1699.068014 |
| 46 | -1698.994526 | -1698.954042 | -1698.953097 | -1699.068905 |
| 47 | -1698.992463 | -1698.951884 | -1698.95094  | -1699.06701  |
| 48 | -1698.993868 | -1698.953213 | -1698.952268 | -1699.068652 |
| 49 | -1698.991774 | -1698.951187 | -1698.950243 | -1699.06654  |
| 50 | -1698.992998 | -1698.952368 | -1698.951424 | -1699.06767  |
| 51 | -1698.993764 | -1698.95326  | -1698.952316 | -1699.068194 |
| 52 | -1698.992794 | -1698.952393 | -1698.951449 | -1699.066465 |
| 53 | -1698.991763 | -1698.951073 | -1698.950128 | -1699.066546 |
| 54 | -1698.991543 | -1698.951108 | -1698.950164 | -1699.065693 |
| 55 | -1698.99219  | -1698.95182  | -1698.950876 | -1699.066227 |
| 56 | -1698.99161  | -1698.951067 | -1698.950123 | -1699.066114 |
| 57 | -1698.993223 | -1698.952655 | -1698.951711 | -1699.068107 |
| 58 | -1698.992297 | -1698.951968 | -1698.951024 | -1699.065288 |

**$E_{zpe}$ , U, H, and G stand for zero-point energy, thermal energy, thermal enthalpy and Gibbs free energy, respectively.**

**Table S2. Boltzmann populations of conformers shown in Table S1.**

| Conformer | E <sub>zpe</sub> | U    | H    | G     |
|-----------|------------------|------|------|-------|
| 1         | 3.7%             | 3.2% | 3.2% | 10.9% |
| 2         | 5.1%             | 5.0% | 5.0% | 4.9%  |
| 3         | 2.2%             | 2.2% | 2.2% | 2.4%  |
| 4         | 1.6%             | 1.9% | 1.8% | 0.7%  |
| 5         | 1.6%             | 1.7% | 1.7% | 1.4%  |
| 6         | 5.1%             | 5.0% | 5.0% | 4.8%  |
| 7         | 0.8%             | 0.8% | 0.8% | 0.8%  |
| 8         | 3.9%             | 3.9% | 3.9% | 5.1%  |
| 9         | 2.7%             | 2.9% | 2.9% | 2.4%  |
| 10        | 2.2%             | 2.2% | 2.2% | 2.4%  |
| 11        | 2.1%             | 2.2% | 2.2% | 2.3%  |
| 12        | 1.7%             | 1.7% | 1.7% | 1.6%  |
| 13        | 1.6%             | 1.7% | 1.7% | 1.4%  |
| 14        | 1.6%             | 1.9% | 1.8% | 0.7%  |
| 15        | 3.0%             | 2.8% | 2.8% | 3.7%  |
| 16        | 1.4%             | 1.4% | 1.4% | 1.2%  |
| 17        | 4.9%             | 4.8% | 4.8% | 3.5%  |
| 18        | 1.7%             | 1.9% | 1.9% | 0.5%  |
| 19        | 2.2%             | 2.2% | 2.2% | 2.6%  |
| 20        | 1.7%             | 1.7% | 1.7% | 1.6%  |
| 21        | 1.2%             | 1.2% | 1.2% | 2.0%  |
| 22        | 4.9%             | 4.8% | 4.8% | 3.5%  |
| 23        | 0.1%             | 0.1% | 0.1% | 0.1%  |
| 24        | 0.8%             | 0.8% | 0.8% | 0.8%  |
| 25        | 3.8%             | 3.8% | 3.8% | 3.3%  |
| 26        | 2.1%             | 2.2% | 2.2% | 1.3%  |
| 27        | 0.8%             | 0.8% | 0.8% | 0.7%  |
| 28        | 2.1%             | 2.2% | 2.2% | 2.3%  |
| 29        | 2.9%             | 3.0% | 3.0% | 2.4%  |
| 30        | 0.2%             | 0.3% | 0.3% | 0.1%  |
| 31        | 1.6%             | 1.7% | 1.7% | 1.4%  |
| 32        | 0.3%             | 0.3% | 0.3% | 0.1%  |
| 33        | 1.7%             | 1.7% | 1.7% | 1.0%  |
| 34        | 0.8%             | 0.8% | 0.8% | 0.7%  |
| 35        | 1.7%             | 1.9% | 1.9% | 0.5%  |
| 36        | 1.4%             | 1.4% | 1.4% | 0.8%  |
| 37        | 3.9%             | 3.9% | 3.9% | 5.1%  |
| 38        | 1.3%             | 1.2% | 1.2% | 2.0%  |
| 39        | 1.6%             | 1.7% | 1.7% | 1.4%  |
| 40        | 1.9%             | 1.6% | 1.6% | 2.5%  |
| 41        | 0.1%             | 0.1% | 0.1% | 0.1%  |
| 42        | 0.1%             | 0.2% | 0.2% | 0.0%  |
| 43        | 0.2%             | 0.3% | 0.3% | 0.1%  |
| 44        | 0.0%             | 0.0% | 0.0% | 0.0%  |
| 45        | 2.1%             | 2.2% | 2.2% | 1.3%  |
| 46        | 3.8%             | 3.8% | 3.8% | 3.3%  |
| 47        | 0.4%             | 0.4% | 0.4% | 0.4%  |
| 48        | 1.9%             | 1.6% | 1.6% | 2.5%  |
| 49        | 0.2%             | 0.2% | 0.2% | 0.3%  |
| 50        | 0.7%             | 0.6% | 0.6% | 0.9%  |
| 51        | 1.7%             | 1.7% | 1.7% | 1.6%  |
| 52        | 0.6%             | 0.7% | 0.7% | 0.2%  |
| 53        | 0.2%             | 0.2% | 0.2% | 0.3%  |
| 54        | 0.2%             | 0.2% | 0.2% | 0.1%  |
| 55        | 0.3%             | 0.4% | 0.4% | 0.2%  |
| 56        | 0.2%             | 0.2% | 0.2% | 0.2%  |

|    |      |      |      |      |
|----|------|------|------|------|
| 57 | 0.9% | 0.9% | 0.9% | 1.4% |
| 58 | 0.4% | 0.4% | 0.4% | 0.1% |

---

**Table S3. Calculated thermodynamic data and zero-point vibrational energy of conformers of 1 (gas phase) employed for chemical shift values and ECD simulation at the B3LYP/6-311+(2d,p) level**

| Conformer | $E_{zpe}$    | U            | H            | G            |
|-----------|--------------|--------------|--------------|--------------|
| 1         | -1699.368641 | -1699.327891 | -1699.326947 | -1699.444577 |
| 2         | -1699.368936 | -1699.328404 | -1699.32746  | -1699.443481 |
| 3         | -1699.368073 | -1699.327447 | -1699.326502 | -1699.444741 |
| 4         | -1699.368221 | -1699.327728 | -1699.326784 | -1699.442408 |
| 5         | -1699.367829 | -1699.327197 | -1699.326253 | -1699.442967 |
| 6         | -1699.368936 | -1699.328404 | -1699.32746  | -1699.443481 |
| 7         | -1699.368221 | -1699.327728 | -1699.326784 | -1699.442409 |
| 8         | -1699.368902 | -1699.328219 | -1699.327275 | -1699.444321 |
| 9         | -1699.368344 | -1699.327739 | -1699.326795 | -1699.444072 |
| 10        | -1699.368073 | -1699.327447 | -1699.326502 | -1699.444746 |
| 11        | -1699.368164 | -1699.327533 | -1699.326589 | -1699.443503 |
| 12        | -1699.367689 | -1699.32722  | -1699.326275 | -1699.442275 |
| 13        | -1699.367828 | -1699.327197 | -1699.326253 | -1699.442965 |
| 14        | -1699.368221 | -1699.327728 | -1699.326784 | -1699.442406 |
| 15        | -1699.368379 | -1699.327747 | -1699.326802 | -1699.443647 |
| 16        | -1699.367881 | -1699.327257 | -1699.326312 | -1699.443019 |
| 17        | -1699.368962 | -1699.328419 | -1699.327474 | -1699.44353  |
| 18        | -1699.36814  | -1699.327695 | -1699.326751 | -1699.442089 |
| 19        | -1699.368    | -1699.327442 | -1699.326498 | -1699.443189 |
| 20        | -1699.367762 | -1699.327182 | -1699.326238 | -1699.442577 |
| 21        | -1699.367308 | -1699.326743 | -1699.325799 | -1699.442843 |
| 22        | -1699.368962 | -1699.328418 | -1699.327474 | -1699.443528 |
| 23        | -1699.366089 | -1699.325628 | -1699.324684 | -1699.439542 |
| 24        | -1699.368221 | -1699.327728 | -1699.326784 | -1699.442409 |
| 25        | -1699.368714 | -1699.32811  | -1699.327166 | -1699.443571 |
| 26        | -1699.368081 | -1699.327542 | -1699.326598 | -1699.442775 |
| 27        | -1699.36814  | -1699.327695 | -1699.326751 | -1699.442089 |
| 28        | -1699.368164 | -1699.327533 | -1699.326589 | -1699.443505 |
| 29        | -1699.368417 | -1699.327799 | -1699.326855 | -1699.443914 |
| 30        | -1699.366199 | -1699.325874 | -1699.32493  | -1699.440017 |
| 31        | -1699.367828 | -1699.327197 | -1699.326253 | -1699.442968 |
| 32        | -1699.366785 | -1699.326423 | -1699.325478 | -1699.440731 |
| 33        | -1699.367746 | -1699.327209 | -1699.326265 | -1699.442502 |
| 34        | -1699.367836 | -1699.327229 | -1699.326285 | -1699.442462 |
| 35        | -1699.36814  | -1699.327695 | -1699.326751 | -1699.442091 |
| 36        | -1699.367742 | -1699.327179 | -1699.326235 | -1699.442159 |
| 37        | -1699.368902 | -1699.328219 | -1699.327275 | -1699.44432  |
| 38        | -1699.367366 | -1699.326788 | -1699.325843 | -1699.442635 |
| 39        | -1699.367829 | -1699.327197 | -1699.326253 | -1699.442968 |
| 40        | -1699.368052 | -1699.327345 | -1699.326401 | -1699.443022 |
| 41        | -1699.366268 | -1699.325715 | -1699.324771 | -1699.440527 |
| 42        | -1699.366267 | -1699.325902 | -1699.324958 | -1699.439889 |
| 43        | -1699.366427 | -1699.326043 | -1699.325099 | -1699.440591 |
| 44        | -1699.364234 | -1699.32393  | -1699.322985 | -1699.437867 |
| 45        | -1699.368081 | -1699.327542 | -1699.326598 | -1699.442775 |
| 46        | -1699.368714 | -1699.32811  | -1699.327166 | -1699.443571 |
| 47        | -1699.36695  | -1699.32631  | -1699.325366 | -1699.441539 |
| 48        | -1699.368052 | -1699.327345 | -1699.326401 | -1699.443022 |
| 49        | -1699.365718 | -1699.325088 | -1699.324144 | -1699.440566 |
| 50        | -1699.36648  | -1699.325721 | -1699.324777 | -1699.441934 |
| 51        | -1699.367762 | -1699.327182 | -1699.326238 | -1699.442577 |
| 52        | -1699.36682  | -1699.32627  | -1699.325326 | -1699.441654 |
| 53        | -1699.368714 | -1699.32811  | -1699.327166 | -1699.443571 |
| 54        | -1699.365654 | -1699.325166 | -1699.324222 | -1699.43998  |

|    |              |              |              |              |
|----|--------------|--------------|--------------|--------------|
| 55 | -1699.36682  | -1699.326398 | -1699.325454 | -1699.44099  |
| 56 | -1699.36695  | -1699.32631  | -1699.325366 | -1699.441538 |
| 57 | -1699.367825 | -1699.327185 | -1699.326241 | -1699.442499 |
| 58 | -1699.366508 | -1699.325919 | -1699.324975 | -1699.441411 |

---

**Table S4. Boltzmann populations of conformers described in Table S3**

| Conformer | $E_{zpe}$ | U    | H    | G    |
|-----------|-----------|------|------|------|
| 1         | 3.2%      | 2.7% | 2.7% | 7.6% |
| 2         | 4.4%      | 4.7% | 4.7% | 2.4% |
| 3         | 1.8%      | 1.7% | 1.7% | 9.1% |
| 4         | 2.1%      | 2.3% | 2.3% | 0.8% |
| 5         | 1.4%      | 1.3% | 1.3% | 1.4% |
| 6         | 4.4%      | 4.7% | 4.7% | 2.4% |
| 7         | 2.1%      | 2.3% | 2.3% | 0.8% |
| 8         | 4.3%      | 3.8% | 3.8% | 5.8% |
| 9         | 2.4%      | 2.3% | 2.3% | 4.5% |
| 10        | 1.8%      | 1.7% | 1.7% | 9.1% |
| 11        | 2.0%      | 1.8% | 1.8% | 2.4% |
| 12        | 1.2%      | 1.3% | 1.3% | 0.7% |
| 13        | 1.4%      | 1.3% | 1.3% | 1.4% |
| 14        | 2.1%      | 2.3% | 2.3% | 0.8% |
| 15        | 2.5%      | 2.3% | 2.3% | 2.8% |
| 16        | 1.4%      | 1.4% | 1.4% | 1.5% |
| 17        | 4.5%      | 4.7% | 4.7% | 2.5% |
| 18        | 1.9%      | 2.2% | 2.2% | 0.5% |
| 19        | 1.6%      | 1.7% | 1.7% | 1.8% |
| 20        | 1.3%      | 1.3% | 1.3% | 0.9% |
| 21        | 0.8%      | 0.8% | 0.8% | 1.2% |
| 22        | 4.5%      | 4.7% | 4.7% | 2.5% |
| 23        | 0.2%      | 0.2% | 0.2% | 0.0% |
| 24        | 2.1%      | 2.3% | 2.3% | 0.8% |
| 25        | 3.5%      | 3.4% | 3.4% | 2.6% |
| 26        | 1.8%      | 1.9% | 1.9% | 1.1% |
| 27        | 1.9%      | 2.2% | 2.2% | 0.5% |
| 28        | 2.0%      | 1.8% | 1.8% | 2.4% |
| 29        | 2.6%      | 2.5% | 2.5% | 3.8% |
| 30        | 0.2%      | 0.3% | 0.3% | 0.1% |
| 31        | 1.4%      | 1.3% | 1.3% | 1.4% |
| 32        | 0.5%      | 0.6% | 0.6% | 0.1% |
| 33        | 1.3%      | 1.3% | 1.3% | 0.8% |
| 34        | 1.4%      | 1.3% | 1.3% | 0.8% |
| 35        | 1.9%      | 2.2% | 2.2% | 0.5% |
| 36        | 1.2%      | 1.3% | 1.3% | 0.6% |
| 37        | 4.3%      | 3.8% | 3.8% | 5.8% |
| 38        | 0.8%      | 0.8% | 0.8% | 1.0% |
| 39        | 1.4%      | 1.3% | 1.3% | 1.4% |
| 40        | 1.7%      | 1.5% | 1.5% | 1.5% |
| 41        | 0.3%      | 0.3% | 0.3% | 0.1% |
| 42        | 0.3%      | 0.3% | 0.3% | 0.1% |
| 43        | 0.3%      | 0.4% | 0.4% | 0.1% |
| 44        | 0.0%      | 0.0% | 0.0% | 0.0% |
| 45        | 1.8%      | 1.9% | 1.9% | 1.1% |
| 46        | 3.5%      | 3.4% | 3.4% | 2.6% |
| 47        | 0.5%      | 0.5% | 0.5% | 0.3% |
| 48        | 1.7%      | 1.5% | 1.5% | 1.5% |
| 49        | 0.1%      | 0.1% | 0.1% | 0.1% |
| 50        | 0.3%      | 0.3% | 0.3% | 0.5% |
| 51        | 1.3%      | 1.3% | 1.3% | 0.9% |
| 52        | 0.5%      | 0.5% | 0.5% | 0.3% |
| 53        | 3.5%      | 3.4% | 3.4% | 2.6% |



|    |      |      |      |      |
|----|------|------|------|------|
| 54 | 0.1% | 0.2% | 0.2% | 0.1% |
| 55 | 0.5% | 0.6% | 0.6% | 0.2% |
| 56 | 0.5% | 0.5% | 0.5% | 0.3% |
| 57 | 1.4% | 1.3% | 1.3% | 0.8% |
| 58 | 0.3% | 0.3% | 0.3% | 0.3% |

---

**Table S5. Experimental and PCM calculation (CHCl<sub>3</sub>) for <sup>13</sup>C chemical shift values of compound 1 at B3LYP/6-31G+(d,p) and B3LYP/6-311G+(2d,p)**

|                     | Experimental | B3LYP/6-31G+(d,p) | B3LYP/6-311G+(2d,p) |
|---------------------|--------------|-------------------|---------------------|
| C-12                | 34.60        | 37.18             | 38.62               |
| C-11                | 18.80        | 23.8              | 24.44               |
| C-5                 | 54.70        | 55.81             | 61.33               |
| C-6                 | 64.50        | 65.6              | 70.33               |
| C-8                 | 86.30        | 90.99             | 95.75               |
| C-9                 | 62.80        | 64.79             | 69.57               |
| C-7                 | 203.80       | 203.86            | 215.82              |
| C-16                | 44.70        | 47.32             | 50.83               |
| C-17                | 50.70        | 54.9              | 60.1                |
| C-13                | 51.70        | 57.83             | 60.76               |
| C-14                | 146.40       | 146.28            | 156.58              |
| C-15                | 126.20       | 127.43            | 135.97              |
| C-18                | 17.10        | 17.28             | 18.52               |
| C-30                | 20.30        | 20.93             | 22.28               |
| C-20                | 33.70        | 37.47             | 40.33               |
| C-22                | 39.10        | 41.07             | 43.16               |
| C-23                | 76.40        | 78.75             | 81.01               |
| C-24                | 36.60        | 37.61             | 40.38               |
| C-25                | 34.10        | 37.98             | 40.37               |
| C-26                | 179.80       | 176.29            | 188.37              |
| C-27                | 15.90        | 16.75             | 17.65               |
| C-10                | 42.80        | 50.57             | 50.32               |
| C-19                | 23.70        | 21.89             | 22.84               |
| C-1                 | 35.40        | 38.62             | 40.54               |
| C-2                 | 30.40        | 31.57             | 34.84               |
| C-3                 | 174.90       | 173.36            | 184.8               |
| OCH <sub>3</sub> -3 | 51.60        | 52.26             | 54.93               |
| C-4                 | 143.50       | 145.54            | 158.6               |
| C-28                | 114.80       | 109.81            | 118.93              |
| C-29                | 23.90        | 25.8              | 27.66               |
| OCH <sub>3</sub> -8 | 54.30        | 53.87             | 56.89               |
| C-21                | 15.40        | 15.68             | 15.96               |

**Coordinates of conformers found at B3LYP/6-311G+(2d,p) in the gas phase  
1**

| Center<br>Number | Atomic<br>Number | Atomic<br>Type | Coordinates (Angstroms) |           |           |
|------------------|------------------|----------------|-------------------------|-----------|-----------|
|                  |                  |                | X                       | Y         | Z         |
| 1                | 6                | 0              | -1.066123               | 0.153046  | -1.161120 |
| 2                | 6                | 0              | 0.329712                | 0.796008  | -1.055589 |
| 3                | 1                | 0              | -1.092159               | -0.403250 | -2.098701 |
| 4                | 1                | 0              | -1.815173               | 0.944596  | -1.249149 |
| 5                | 1                | 0              | 0.378406                | 1.501882  | -0.225808 |
| 6                | 1                | 0              | 0.519497                | 1.367904  | -1.969025 |
| 7                | 6                | 0              | 3.553060                | -1.177539 | -0.169238 |
| 8                | 6                | 0              | 2.379814                | -2.061994 | 0.328805  |
| 9                | 6                | 0              | 1.172933                | -1.075947 | 0.428031  |
| 10               | 6                | 0              | 1.375526                | -0.301708 | -0.889619 |
| 11               | 6                | 0              | 2.773689                | -2.859840 | 1.552945  |
| 12               | 1                | 0              | 2.087765                | -2.793877 | -0.423907 |
| 13               | 8                | 0              | 1.344594                | -0.119354 | 1.492233  |
| 14               | 6                | 0              | -2.082305               | -3.067777 | 0.658423  |
| 15               | 6                | 0              | -2.537008               | -1.909188 | -0.283386 |
| 16               | 6                | 0              | -1.425918               | -0.781734 | 0.026605  |
| 17               | 6                | 0              | -0.220930               | -1.657925 | 0.435500  |
| 18               | 6                | 0              | -0.600502               | -2.880927 | 0.792637  |
| 19               | 1                | 0              | -2.564075               | -2.999087 | 1.642602  |
| 20               | 1                | 0              | -2.346214               | -4.050466 | 0.258633  |
| 21               | 6                | 0              | -2.414293               | -2.433595 | -1.728227 |
| 22               | 6                | 0              | -1.825174               | 0.098697  | 1.234626  |
| 23               | 1                | 0              | 0.061539                | -3.657291 | 1.154391  |
| 24               | 1                | 0              | -2.704676               | -1.696450 | -2.477294 |
| 25               | 1                | 0              | -1.390678               | -2.743670 | -1.946313 |
| 26               | 1                | 0              | -3.052402               | -3.308190 | -1.866518 |
| 27               | 1                | 0              | -1.002787               | 0.758854  | 1.506292  |
| 28               | 1                | 0              | -2.691200               | 0.723834  | 1.013119  |
| 29               | 1                | 0              | -2.066500               | -0.502719 | 2.112926  |
| 30               | 6                | 0              | -4.013929               | -1.497557 | 0.024495  |
| 31               | 6                | 0              | -4.546212               | -0.380433 | -0.898258 |
| 32               | 6                | 0              | -5.854320               | 0.267032  | -0.447903 |
| 33               | 6                | 0              | -6.295454               | 1.463833  | -1.311354 |
| 34               | 6                | 0              | -5.756439               | 2.681091  | -0.553281 |
| 35               | 6                | 0              | -5.657077               | 2.171520  | 0.881646  |
| 36               | 8                | 0              | -5.711941               | 0.814213  | 0.894838  |
| 37               | 1                | 0              | -6.644448               | -0.478940 | -0.373239 |
| 38               | 1                | 0              | -7.386393               | 1.511109  | -1.358156 |
| 39               | 1                | 0              | -5.921328               | 1.389233  | -2.332784 |
| 40               | 1                | 0              | -4.723718               | 2.884943  | -0.860289 |
| 41               | 6                | 0              | -6.565527               | 3.968503  | -0.670984 |
| 42               | 1                | 0              | -4.027612               | -1.107439 | 1.043687  |
| 43               | 1                | 0              | -4.722565               | -0.781062 | -1.902435 |
| 44               | 1                | 0              | -3.799314               | 0.407879  | -1.011766 |
| 45               | 8                | 0              | -5.535055               | 2.816533  | 1.884340  |
| 46               | 1                | 0              | -6.152928               | 4.738989  | -0.018901 |
| 47               | 1                | 0              | -6.554419               | 4.340091  | -1.697775 |
| 48               | 1                | 0              | -7.605664               | 3.803331  | -0.380096 |
| 49               | 1                | 0              | 1.166653                | -1.044074 | -1.669765 |
| 50               | 6                | 0              | 2.898559                | 0.013128  | -1.017595 |

|    |   |   |           |           |           |
|----|---|---|-----------|-----------|-----------|
| 51 | 6 | 0 | 3.282884  | -0.016002 | -2.504943 |
| 52 | 6 | 0 | 3.210435  | 1.408456  | -0.417662 |
| 53 | 1 | 0 | 4.344887  | 0.170015  | -2.669942 |
| 54 | 1 | 0 | 3.052170  | -0.980838 | -2.958637 |
| 55 | 1 | 0 | 2.727584  | 0.753720  | -3.048331 |
| 56 | 6 | 0 | 4.672759  | 1.851922  | -0.408442 |
| 57 | 6 | 0 | 4.841518  | 3.271681  | 0.090126  |
| 58 | 8 | 0 | 3.970492  | 4.099755  | 0.182476  |
| 59 | 8 | 0 | 6.132561  | 3.518802  | 0.408588  |
| 60 | 6 | 0 | 6.419720  | 4.857159  | 0.851322  |
| 61 | 6 | 0 | 4.677272  | -1.973688 | -0.822230 |
| 62 | 1 | 0 | 3.985689  | -0.712453 | 0.723688  |
| 63 | 6 | 0 | 4.496939  | -3.146125 | -1.430816 |
| 64 | 6 | 0 | 6.065791  | -1.391649 | -0.723975 |
| 65 | 1 | 0 | 5.333763  | -3.674930 | -1.872166 |
| 66 | 1 | 0 | 3.533366  | -3.630279 | -1.518338 |
| 67 | 1 | 0 | 6.150184  | -0.441946 | -1.257243 |
| 68 | 1 | 0 | 6.332358  | -1.191172 | 0.318984  |
| 69 | 1 | 0 | 6.808592  | -2.073944 | -1.138434 |
| 70 | 1 | 0 | 5.113291  | 1.831334  | -1.410817 |
| 71 | 1 | 0 | 5.300960  | 1.208525  | 0.209101  |
| 72 | 1 | 0 | 2.829960  | 1.444839  | 0.602478  |
| 73 | 1 | 0 | 2.643498  | 2.155473  | -0.976974 |
| 74 | 8 | 0 | 2.340070  | -3.949904 | 1.836303  |
| 75 | 1 | 0 | 3.546769  | -2.390124 | 2.197488  |
| 76 | 6 | 0 | 1.166110  | -0.565418 | 2.828816  |
| 77 | 1 | 0 | 1.005587  | 0.327320  | 3.433542  |
| 78 | 1 | 0 | 0.303475  | -1.227117 | 2.931292  |
| 79 | 1 | 0 | 2.055154  | -1.081997 | 3.205838  |
| 80 | 6 | 0 | -4.978894 | -2.698539 | 0.005195  |
| 81 | 1 | 0 | -5.965862 | -2.408553 | 0.370136  |
| 82 | 1 | 0 | -5.109011 | -3.105563 | -1.000926 |
| 83 | 1 | 0 | -4.634019 | -3.506991 | 0.649676  |
| 84 | 1 | 0 | 5.855298  | 5.088754  | 1.754231  |
| 85 | 1 | 0 | 7.487874  | 4.874026  | 1.052441  |
| 86 | 1 | 0 | 6.163379  | 5.578471  | 0.075674  |

---

2

| Center<br>Number | Atomic<br>Number | Atomic<br>Type | Coordinates (Angstroms) |           |           |
|------------------|------------------|----------------|-------------------------|-----------|-----------|
|                  |                  |                | X                       | Y         | Z         |
| 1                | 6                | 0              | -0.857634               | 0.150912  | -1.032275 |
| 2                | 6                | 0              | 0.513337                | 0.811110  | -0.788746 |
| 3                | 1                | 0              | -0.838356               | -0.255552 | -2.044192 |
| 4                | 1                | 0              | -1.629044               | 0.925684  | -1.023371 |
| 5                | 1                | 0              | 0.513717                | 1.390805  | 0.135893  |
| 6                | 1                | 0              | 0.699455                | 1.509700  | -1.608677 |
| 7                | 6                | 0              | 3.760618                | -1.143050 | 0.008584  |
| 8                | 6                | 0              | 2.620644                | -2.157895 | 0.239632  |
| 9                | 6                | 0              | 1.369749                | -1.237009 | 0.425722  |
| 10               | 6                | 0              | 1.596674                | -0.263734 | -0.748157 |
| 11               | 6                | 0              | 2.971126                | -3.144490 | 1.333091  |
| 12               | 1                | 0              | 2.415234                | -2.752327 | -0.652601 |
| 13               | 8                | 0              | 1.465163                | -0.437990 | 1.622287  |
| 14               | 6                | 0              | -1.815085               | -3.340312 | 0.228778  |
| 15               | 6                | 0              | -2.286300               | -2.061520 | -0.531115 |
| 16               | 6                | 0              | -1.221864               | -0.964635 | -0.014907 |
| 17               | 6                | 0              | 0.000009                | -1.856815 | 0.292184  |
| 18               | 6                | 0              | -0.344887               | -3.132632 | 0.436323  |
| 19               | 1                | 0              | -2.321165               | -3.443100 | 1.197412  |
| 20               | 1                | 0              | -2.035667               | -4.254317 | -0.328998 |
| 21               | 6                | 0              | -2.108414               | -2.346200 | -2.036259 |
| 22               | 6                | 0              | -1.689454               | -0.292158 | 1.297706  |
| 23               | 1                | 0              | 0.334632                | -3.935833 | 0.690126  |
| 24               | 1                | 0              | -2.404667               | -1.508007 | -2.667350 |
| 25               | 1                | 0              | -1.068978               | -2.585672 | -2.268236 |
| 26               | 1                | 0              | -2.710088               | -3.207245 | -2.332948 |
| 27               | 1                | 0              | -0.904936               | 0.352608  | 1.690822  |
| 28               | 1                | 0              | -2.578482               | 0.320927  | 1.145187  |
| 29               | 1                | 0              | -1.924949               | -1.028407 | 2.068523  |
| 30               | 6                | 0              | -3.783998               | -1.747617 | -0.208194 |
| 31               | 6                | 0              | -4.339245               | -0.531913 | -0.982349 |
| 32               | 6                | 0              | -5.648240               | 0.036688  | -0.439224 |
| 33               | 6                | 0              | -6.154581               | 1.285220  | -1.185761 |
| 34               | 6                | 0              | -5.619826               | 2.453777  | -0.351845 |
| 35               | 6                | 0              | -5.445841               | 1.833349  | 1.031596  |
| 36               | 8                | 0              | -5.470652               | 0.478727  | 0.937997  |
| 37               | 1                | 0              | -6.414163               | -0.736529 | -0.397627 |
| 38               | 1                | 0              | -7.247381               | 1.302813  | -1.188454 |
| 39               | 1                | 0              | -5.819082               | 1.303902  | -2.223045 |
| 40               | 1                | 0              | -4.607414               | 2.715795  | -0.681879 |
| 41               | 6                | 0              | -6.471204               | 3.719088  | -0.331041 |
| 42               | 1                | 0              | -3.834165               | -1.503519 | 0.854487  |
| 43               | 1                | 0              | -4.522033               | -0.811248 | -2.025589 |
| 44               | 1                | 0              | -3.604298               | 0.275441  | -1.005867 |
| 45               | 8                | 0              | -5.293341               | 2.399638  | 2.076921  |
| 46               | 1                | 0              | -6.055025               | 4.447504  | 0.365586  |
| 47               | 1                | 0              | -6.514272               | 4.172462  | -1.323541 |
| 48               | 1                | 0              | -7.492793               | 3.496255  | -0.014171 |
| 49               | 1                | 0              | 1.437804                | -0.882423 | -1.639804 |
| 50               | 6                | 0              | 3.118280                | 0.095542  | -0.771972 |
| 51               | 6                | 0              | 3.574492                | 0.168203  | -2.238064 |

|    |   |   |           |           |           |
|----|---|---|-----------|-----------|-----------|
| 52 | 6 | 0 | 3.514328  | 1.386667  | -0.005451 |
| 53 | 1 | 0 | 4.611499  | 0.496724  | -2.336068 |
| 54 | 1 | 0 | 3.492492  | -0.805153 | -2.724182 |
| 55 | 1 | 0 | 2.952919  | 0.869052  | -2.801203 |
| 56 | 6 | 0 | 3.224180  | 2.733602  | -0.674345 |
| 57 | 6 | 0 | 3.867700  | 3.887877  | 0.064609  |
| 58 | 8 | 0 | 4.799588  | 3.810410  | 0.826199  |
| 59 | 8 | 0 | 3.275623  | 5.058921  | -0.259896 |
| 60 | 6 | 0 | 3.843090  | 6.233551  | 0.346959  |
| 61 | 6 | 0 | 5.043182  | -1.725115 | -0.556742 |
| 62 | 1 | 0 | 4.017070  | -0.756617 | 1.001218  |
| 63 | 6 | 0 | 5.103442  | -2.887843 | -1.206416 |
| 64 | 6 | 0 | 6.300133  | -0.930196 | -0.301079 |
| 65 | 1 | 0 | 6.048546  | -3.268680 | -1.576155 |
| 66 | 1 | 0 | 4.236102  | -3.507840 | -1.391891 |
| 67 | 1 | 0 | 6.252242  | 0.066686  | -0.746846 |
| 68 | 1 | 0 | 6.452929  | -0.781597 | 0.772744  |
| 69 | 1 | 0 | 7.177648  | -1.436663 | -0.704523 |
| 70 | 1 | 0 | 2.160086  | 2.945639  | -0.765213 |
| 71 | 1 | 0 | 3.627932  | 2.767711  | -1.691677 |
| 72 | 1 | 0 | 4.589575  | 1.351155  | 0.179913  |
| 73 | 1 | 0 | 3.041026  | 1.365386  | 0.977166  |
| 74 | 8 | 0 | 2.563519  | -4.279105 | 1.395952  |
| 75 | 1 | 0 | 3.683550  | -2.773115 | 2.098759  |
| 76 | 6 | 0 | 1.282156  | -1.086613 | 2.872917  |
| 77 | 1 | 0 | 1.012698  | -0.311281 | 3.590421  |
| 78 | 1 | 0 | 0.485182  | -1.832586 | 2.836361  |
| 79 | 1 | 0 | 2.204408  | -1.567461 | 3.215876  |
| 80 | 6 | 0 | -4.702023 | -2.965783 | -0.423615 |
| 81 | 1 | 0 | -5.715892 | -2.753661 | -0.078820 |
| 82 | 1 | 0 | -4.768984 | -3.247608 | -1.477470 |
| 83 | 1 | 0 | -4.359171 | -3.836841 | 0.134467  |
| 84 | 1 | 0 | 4.886676  | 6.347475  | 0.054204  |
| 85 | 1 | 0 | 3.249001  | 7.066404  | -0.020554 |
| 86 | 1 | 0 | 3.782119  | 6.167995  | 1.432877  |

---

## 3

| Center<br>Number | Atomic<br>Number | Atomic<br>Type | Coordinates (Angstroms) |           |           |
|------------------|------------------|----------------|-------------------------|-----------|-----------|
|                  |                  |                | X                       | Y         | Z         |
| 1                | 6                | 0              | -1.056792               | 0.084566  | -1.173521 |
| 2                | 6                | 0              | 0.323788                | 0.765682  | -1.117524 |
| 3                | 1                | 0              | -1.084451               | -0.505939 | -2.090066 |
| 4                | 1                | 0              | -1.827368               | 0.853396  | -1.275790 |
| 5                | 1                | 0              | 0.369162                | 1.498477  | -0.311194 |
| 6                | 1                | 0              | 0.480630                | 1.311739  | -2.052635 |
| 7                | 6                | 0              | 3.611899                | -1.100081 | -0.231620 |
| 8                | 6                | 0              | 2.470139                | -1.994932 | 0.318045  |
| 9                | 6                | 0              | 1.241943                | -1.034940 | 0.409727  |
| 10               | 6                | 0              | 1.400013                | -0.300151 | -0.936159 |
| 11               | 6                | 0              | 2.906274                | -2.745378 | 1.558066  |
| 12               | 1                | 0              | 2.180236                | -2.757117 | -0.405077 |
| 13               | 8                | 0              | 1.411115                | -0.038857 | 1.438264  |
| 14               | 6                | 0              | -1.960305               | -3.090128 | 0.780047  |
| 15               | 6                | 0              | -2.462254               | -1.976520 | -0.190799 |
| 16               | 6                | 0              | -1.370536               | -0.814704 | 0.054112  |
| 17               | 6                | 0              | -0.137052               | -1.648415 | 0.466268  |
| 18               | 6                | 0              | -0.480491               | -2.866923 | 0.872520  |
| 19               | 1                | 0              | -2.419594               | -2.996150 | 1.772814  |
| 20               | 1                | 0              | -2.211959               | -4.091793 | 0.421746  |
| 21               | 6                | 0              | -2.358665               | -2.548219 | -1.619092 |
| 22               | 6                | 0              | -1.764852               | 0.099393  | 1.238398  |
| 23               | 1                | 0              | 0.206633                | -3.616101 | 1.244732  |
| 24               | 1                | 0              | -2.681326               | -1.843746 | -2.386103 |
| 25               | 1                | 0              | -1.332874               | -2.842342 | -1.848585 |
| 26               | 1                | 0              | -2.978934               | -3.441251 | -1.714458 |
| 27               | 1                | 0              | -0.955043               | 0.791044  | 1.466406  |
| 28               | 1                | 0              | -2.653266               | 0.691803  | 1.016446  |
| 29               | 1                | 0              | -1.968072               | -0.476090 | 2.143330  |
| 30               | 6                | 0              | -3.941177               | -1.586275 | 0.135141  |
| 31               | 6                | 0              | -4.523777               | -0.526968 | -0.825351 |
| 32               | 6                | 0              | -5.815557               | 0.136176  | -0.352667 |
| 33               | 6                | 0              | -6.333607               | 1.247529  | -1.284565 |
| 34               | 6                | 0              | -5.772707               | 2.533545  | -0.669288 |
| 35               | 6                | 0              | -5.569950               | 2.150486  | 0.794101  |
| 36               | 8                | 0              | -5.601476               | 0.799212  | 0.927309  |
| 37               | 1                | 0              | -6.584058               | -0.612356 | -0.164280 |
| 38               | 1                | 0              | -7.426031               | 1.274608  | -1.264966 |
| 39               | 1                | 0              | -6.023051               | 1.090390  | -2.317852 |
| 40               | 1                | 0              | -4.766662               | 2.726847  | -1.060336 |
| 41               | 6                | 0              | -6.615618               | 3.792853  | -0.841744 |
| 42               | 1                | 0              | -3.940377               | -1.149634 | 1.135557  |
| 43               | 1                | 0              | -4.739780               | -0.986524 | -1.795926 |
| 44               | 1                | 0              | -3.790830               | 0.259547  | -1.016321 |
| 45               | 8                | 0              | -5.391666               | 2.881119  | 1.727352  |
| 46               | 1                | 0              | -6.179443               | 4.623063  | -0.285334 |
| 47               | 1                | 0              | -6.678060               | 4.075209  | -1.894760 |
| 48               | 1                | 0              | -7.631280               | 3.635835  | -0.470816 |
| 49               | 1                | 0              | 1.195312                | -1.072199 | -1.687980 |
| 50               | 6                | 0              | 2.912734                | 0.045258  | -1.104717 |
| 51               | 6                | 0              | 3.268490                | -0.019212 | -2.597606 |

|    |   |   |           |           |           |
|----|---|---|-----------|-----------|-----------|
| 52 | 6 | 0 | 3.201587  | 1.466370  | -0.554439 |
| 53 | 1 | 0 | 4.319240  | 0.199246  | -2.790984 |
| 54 | 1 | 0 | 3.062362  | -1.006316 | -3.013475 |
| 55 | 1 | 0 | 2.676382  | 0.712844  | -3.153726 |
| 56 | 6 | 0 | 4.663004  | 1.949986  | -0.594987 |
| 57 | 6 | 0 | 4.740764  | 3.387423  | -0.135632 |
| 58 | 8 | 0 | 4.366745  | 4.337973  | -0.778041 |
| 59 | 8 | 0 | 5.263846  | 3.493663  | 1.105674  |
| 60 | 6 | 0 | 5.339764  | 4.829741  | 1.635415  |
| 61 | 6 | 0 | 4.742632  | -1.889297 | -0.881457 |
| 62 | 1 | 0 | 4.050049  | -0.595480 | 0.636509  |
| 63 | 6 | 0 | 4.581240  | -3.087918 | -1.442446 |
| 64 | 6 | 0 | 6.116003  | -1.266824 | -0.835314 |
| 65 | 1 | 0 | 5.422327  | -3.610249 | -1.883370 |
| 66 | 1 | 0 | 3.629823  | -3.600809 | -1.489588 |
| 67 | 1 | 0 | 6.866886  | -1.939162 | -1.251296 |
| 68 | 1 | 0 | 6.159040  | -0.329703 | -1.394973 |
| 69 | 1 | 0 | 6.402900  | -1.031010 | 0.194786  |
| 70 | 1 | 0 | 5.051803  | 1.928340  | -1.614639 |
| 71 | 1 | 0 | 5.302532  | 1.337564  | 0.038435  |
| 72 | 1 | 0 | 2.845565  | 1.520516  | 0.474414  |
| 73 | 1 | 0 | 2.609252  | 2.179727  | -1.132639 |
| 74 | 8 | 0 | 2.497714  | -3.832372 | 1.886848  |
| 75 | 1 | 0 | 3.685932  | -2.242801 | 2.168764  |
| 76 | 6 | 0 | 1.277114  | -0.446039 | 2.792298  |
| 77 | 1 | 0 | 1.103858  | 0.460637  | 3.372322  |
| 78 | 1 | 0 | 0.437093  | -1.128673 | 2.936296  |
| 79 | 1 | 0 | 2.189932  | -0.923489 | 3.163700  |
| 80 | 6 | 0 | -4.876374 | -2.809272 | 0.193733  |
| 81 | 1 | 0 | -5.867570 | -2.522736 | 0.550183  |
| 82 | 1 | 0 | -5.005148 | -3.275619 | -0.786385 |
| 83 | 1 | 0 | -4.508006 | -3.571408 | 0.880290  |
| 84 | 1 | 0 | 4.345561  | 5.271599  | 1.695423  |
| 85 | 1 | 0 | 5.774504  | 4.725752  | 2.626256  |
| 86 | 1 | 0 | 5.969902  | 5.453724  | 1.002228  |

---



| Center<br>Number | Atomic<br>Number | Atomic<br>Type | Coordinates (Angstroms) |           |           |
|------------------|------------------|----------------|-------------------------|-----------|-----------|
|                  |                  |                | X                       | Y         | Z         |
| 1                | 6                | 0              | -0.924904               | 0.011897  | -1.177023 |
| 2                | 6                | 0              | 0.444039                | 0.721893  | -1.162557 |
| 3                | 1                | 0              | -0.970015               | -0.564302 | -2.101633 |
| 4                | 1                | 0              | -1.714113               | 0.765479  | -1.241739 |
| 5                | 1                | 0              | 0.494107                | 1.469095  | -0.369766 |
| 6                | 1                | 0              | 0.565805                | 1.254998  | -2.109671 |
| 7                | 6                | 0              | 3.788213                | -0.929570 | -0.207318 |
| 8                | 6                | 0              | 2.718066                | -1.922392 | 0.302496  |
| 9                | 6                | 0              | 1.433069                | -1.031673 | 0.371393  |
| 10               | 6                | 0              | 1.537911                | -0.327396 | -0.995316 |
| 11               | 6                | 0              | 3.168918                | -2.641329 | 1.555624  |
| 12               | 1                | 0              | 2.502590                | -2.698415 | -0.435057 |
| 13               | 8                | 0              | 1.556329                | -0.003665 | 1.374629  |
| 14               | 6                | 0              | -1.677980               | -3.216027 | 0.764088  |
| 15               | 6                | 0              | -2.228042               | -2.122101 | -0.203025 |
| 16               | 6                | 0              | -1.186512               | -0.914648 | 0.045137  |
| 17               | 6                | 0              | 0.082669                | -1.700195 | 0.448248  |
| 18               | 6                | 0              | -0.208436               | -2.932326 | 0.853279  |
| 19               | 1                | 0              | -2.139151               | -3.144333 | 1.757852  |
| 20               | 1                | 0              | -1.888185               | -4.226282 | 0.403226  |
| 21               | 6                | 0              | -2.100721               | -2.684565 | -1.633066 |
| 22               | 6                | 0              | -1.617330               | -0.028281 | 1.237775  |
| 23               | 1                | 0              | 0.511343                | -3.652709 | 1.220516  |
| 24               | 1                | 0              | -2.458935               | -1.994680 | -2.397476 |
| 25               | 1                | 0              | -1.062764               | -2.928974 | -1.866022 |
| 26               | 1                | 0              | -2.678139               | -3.605728 | -1.728750 |
| 27               | 1                | 0              | -0.846563               | 0.709710  | 1.455750  |
| 28               | 1                | 0              | -2.541198               | 0.511711  | 1.028379  |
| 29               | 1                | 0              | -1.775325               | -0.615862 | 2.144016  |
| 30               | 6                | 0              | -3.723059               | -1.798886 | 0.124386  |
| 31               | 6                | 0              | -4.351939               | -0.760005 | -0.829675 |
| 32               | 6                | 0              | -5.662175               | -0.144530 | -0.343737 |
| 33               | 6                | 0              | -6.234741               | 0.941659  | -1.273436 |
| 34               | 6                | 0              | -5.715223               | 2.251454  | -0.671871 |
| 35               | 6                | 0              | -5.475839               | 1.883550  | 0.789836  |
| 36               | 8                | 0              | -5.456824               | 0.532852  | 0.930263  |
| 37               | 1                | 0              | -6.399045               | -0.920816 | -0.141672 |
| 38               | 1                | 0              | -7.327007               | 0.927119  | -1.238768 |
| 39               | 1                | 0              | -5.932577               | 0.791175  | -2.310194 |
| 40               | 1                | 0              | -4.723841               | 2.482752  | -1.079270 |
| 41               | 6                | 0              | -6.609945               | 3.475759  | -0.836168 |
| 42               | 1                | 0              | -3.742404               | -1.370338 | 1.128062  |
| 43               | 1                | 0              | -4.559784               | -1.226890 | -1.798531 |
| 44               | 1                | 0              | -3.649911               | 0.052680  | -1.026438 |
| 45               | 8                | 0              | -5.309538               | 2.625151  | 1.716690  |
| 46               | 1                | 0              | -6.198534               | 4.325110  | -0.289896 |
| 47               | 1                | 0              | -6.699647               | 3.750554  | -1.889201 |
| 48               | 1                | 0              | -7.612761               | 3.280250  | -0.448950 |
| 49               | 1                | 0              | 1.288196                | -1.121669 | -1.707805 |
| 50               | 6                | 0              | 3.049290                | -0.008700 | -1.270925 |
| 51               | 6                | 0              | 3.352416                | -0.452446 | -2.715859 |

|    |   |   |           |           |           |
|----|---|---|-----------|-----------|-----------|
| 52 | 6 | 0 | 3.428786  | 1.492106  | -1.192521 |
| 53 | 1 | 0 | 4.389669  | -0.262237 | -2.997078 |
| 54 | 1 | 0 | 3.163179  | -1.517992 | -2.857443 |
| 55 | 1 | 0 | 2.715896  | 0.097400  | -3.415148 |
| 56 | 6 | 0 | 3.417096  | 2.195463  | 0.164620  |
| 57 | 6 | 0 | 3.562670  | 3.694875  | 0.036107  |
| 58 | 8 | 0 | 3.428863  | 4.339872  | -0.974780 |
| 59 | 8 | 0 | 3.848049  | 4.254596  | 1.233721  |
| 60 | 6 | 0 | 3.958253  | 5.688531  | 1.241337  |
| 61 | 6 | 0 | 5.102728  | -1.552869 | -0.636276 |
| 62 | 1 | 0 | 4.021649  | -0.289086 | 0.648951  |
| 63 | 6 | 0 | 5.245532  | -2.842790 | -0.940836 |
| 64 | 6 | 0 | 6.292197  | -0.625209 | -0.660336 |
| 65 | 1 | 0 | 6.211628  | -3.242168 | -1.227321 |
| 66 | 1 | 0 | 4.426484  | -3.549893 | -0.916853 |
| 67 | 1 | 0 | 7.201268  | -1.151084 | -0.953775 |
| 68 | 1 | 0 | 6.144282  | 0.206358  | -1.354389 |
| 69 | 1 | 0 | 6.458099  | -0.181699 | 0.327094  |
| 70 | 1 | 0 | 4.214199  | 1.844232  | 0.823402  |
| 71 | 1 | 0 | 2.490526  | 2.005324  | 0.710086  |
| 72 | 1 | 0 | 2.764959  | 2.040496  | -1.864114 |
| 73 | 1 | 0 | 4.424548  | 1.616191  | -1.627443 |
| 74 | 8 | 0 | 2.805598  | -3.744335 | 1.885701  |
| 75 | 1 | 0 | 3.909829  | -2.096942 | 2.177120  |
| 76 | 6 | 0 | 1.456845  | -0.386522 | 2.739577  |
| 77 | 1 | 0 | 1.210518  | 0.515942  | 3.299547  |
| 78 | 1 | 0 | 0.674943  | -1.131360 | 2.900786  |
| 79 | 1 | 0 | 2.405898  | -0.779160 | 3.118939  |
| 80 | 6 | 0 | -4.603655 | -3.062189 | 0.172764  |
| 81 | 1 | 0 | -5.609469 | -2.820214 | 0.521371  |
| 82 | 1 | 0 | -4.703769 | -3.530566 | -0.809675 |
| 83 | 1 | 0 | -4.208146 | -3.809251 | 0.860893  |
| 84 | 1 | 0 | 4.758285  | 6.012940  | 0.576294  |
| 85 | 1 | 0 | 3.021609  | 6.144538  | 0.921275  |
| 86 | 1 | 0 | 4.182785  | 5.957601  | 2.270380  |

---

## 5

| Center<br>Number | Atomic<br>Number | Atomic<br>Type | Coordinates (Angstroms) |           |           |
|------------------|------------------|----------------|-------------------------|-----------|-----------|
|                  |                  |                | X                       | Y         | Z         |
| 1                | 6                | 0              | -1.022014               | 0.150989  | -1.103712 |
| 2                | 6                | 0              | 0.358601                | 0.821602  | -0.971634 |
| 3                | 1                | 0              | -1.037918               | -0.361984 | -2.065837 |
| 4                | 1                | 0              | -1.789830               | 0.927732  | -1.152160 |
| 5                | 1                | 0              | 0.390690                | 1.487883  | -0.108826 |
| 6                | 1                | 0              | 0.531437                | 1.439386  | -1.858311 |
| 7                | 6                | 0              | 3.631019                | -1.117777 | -0.185604 |
| 8                | 6                | 0              | 2.479016                | -2.045207 | 0.283645  |
| 9                | 6                | 0              | 1.250094                | -1.092109 | 0.426262  |
| 10               | 6                | 0              | 1.431064                | -0.257240 | -0.856585 |
| 11               | 6                | 0              | 2.896052                | -2.882497 | 1.473773  |
| 12               | 1                | 0              | 2.198906                | -2.753290 | -0.495889 |
| 13               | 8                | 0              | 1.398228                | -0.176647 | 1.528788  |
| 14               | 6                | 0              | -1.952788               | -3.174317 | 0.568080  |
| 15               | 6                | 0              | -2.438854               | -1.985929 | -0.318844 |
| 16               | 6                | 0              | -1.355864               | -0.845235 | 0.040889  |
| 17               | 6                | 0              | -0.129041               | -1.708085 | 0.409204  |
| 18               | 6                | 0              | -0.476242               | -2.955661 | 0.709557  |
| 19               | 1                | 0              | -2.433325               | -3.163963 | 1.555017  |
| 20               | 1                | 0              | -2.192696               | -4.143863 | 0.123436  |
| 21               | 6                | 0              | -2.305857               | -2.440548 | -1.786430 |
| 22               | 6                | 0              | -1.778471               | -0.029163 | 1.285470  |
| 23               | 1                | 0              | 0.206886                | -3.729848 | 1.035086  |
| 24               | 1                | 0              | -2.611723               | -1.675590 | -2.500566 |
| 25               | 1                | 0              | -1.276108               | -2.719088 | -2.017895 |
| 26               | 1                | 0              | -2.925369               | -3.321015 | -1.965412 |
| 27               | 1                | 0              | -0.972877               | 0.638062  | 1.588044  |
| 28               | 1                | 0              | -2.660051               | 0.582912  | 1.089807  |
| 29               | 1                | 0              | -2.004749               | -0.674583 | 2.136268  |
| 30               | 6                | 0              | -3.925769               | -1.625896 | 0.005886  |
| 31               | 6                | 0              | -4.494779               | -0.501795 | -0.887587 |
| 32               | 6                | 0              | -5.777762               | 0.147680  | -0.374112 |
| 33               | 6                | 0              | -6.297114               | 1.302569  | -1.250880 |
| 34               | 6                | 0              | -5.720569               | 2.556151  | -0.585597 |
| 35               | 6                | 0              | -5.506312               | 2.107931  | 0.857418  |
| 36               | 8                | 0              | -5.547369               | 0.752317  | 0.931827  |
| 37               | 1                | 0              | -6.549363               | -0.603707 | -0.211245 |
| 38               | 1                | 0              | -7.389066               | 1.336281  | -1.218881 |
| 39               | 1                | 0              | -5.998084               | 1.188841  | -2.293188 |
| 40               | 1                | 0              | -4.717009               | 2.759356  | -0.978023 |
| 41               | 6                | 0              | -6.555397               | 3.828002  | -0.693738 |
| 42               | 1                | 0              | -3.947715               | -1.264253 | 1.035379  |
| 43               | 1                | 0              | -4.716661               | -0.900107 | -1.883582 |
| 44               | 1                | 0              | -3.752364               | 0.285742  | -1.032270 |
| 45               | 8                | 0              | -5.312672               | 2.795967  | 1.819506  |
| 46               | 1                | 0              | -6.108314               | 4.629022  | -0.104135 |
| 47               | 1                | 0              | -6.624771               | 4.158301  | -1.732303 |
| 48               | 1                | 0              | -7.569010               | 3.661659  | -0.321320 |
| 49               | 1                | 0              | 1.237971                | -0.968465 | -1.669017 |
| 50               | 6                | 0              | 2.946758                | 0.096294  | -0.973507 |
| 51               | 6                | 0              | 3.324274                | 0.152763  | -2.461632 |

|    |   |   |           |           |           |
|----|---|---|-----------|-----------|-----------|
| 52 | 6 | 0 | 3.232817  | 1.463630  | -0.299724 |
| 53 | 1 | 0 | 4.380964  | 0.369096  | -2.622991 |
| 54 | 1 | 0 | 3.109528  | -0.791994 | -2.962824 |
| 55 | 1 | 0 | 2.750258  | 0.937705  | -2.962121 |
| 56 | 6 | 0 | 4.697778  | 1.940055  | -0.286344 |
| 57 | 6 | 0 | 4.808874  | 3.262065  | 0.434989  |
| 58 | 8 | 0 | 5.048288  | 3.395339  | 1.609956  |
| 59 | 8 | 0 | 4.576022  | 4.303438  | -0.395264 |
| 60 | 6 | 0 | 4.610177  | 5.605585  | 0.215513  |
| 61 | 6 | 0 | 4.761573  | -1.862477 | -0.887280 |
| 62 | 1 | 0 | 4.066670  | -0.684805 | 0.721633  |
| 63 | 6 | 0 | 4.593523  | -3.006352 | -1.551074 |
| 64 | 6 | 0 | 6.141466  | -1.263079 | -0.773492 |
| 65 | 1 | 0 | 5.434139  | -3.499390 | -2.025337 |
| 66 | 1 | 0 | 3.636900  | -3.501480 | -1.652734 |
| 67 | 1 | 0 | 6.890838  | -1.912415 | -1.227188 |
| 68 | 1 | 0 | 6.204873  | -0.287628 | -1.261668 |
| 69 | 1 | 0 | 6.414835  | -1.108385 | 0.275363  |
| 70 | 1 | 0 | 5.081803  | 2.057933  | -1.300383 |
| 71 | 1 | 0 | 5.329250  | 1.237394  | 0.254547  |
| 72 | 1 | 0 | 2.871824  | 1.426495  | 0.727573  |
| 73 | 1 | 0 | 2.641613  | 2.223923  | -0.817384 |
| 74 | 8 | 0 | 2.482902  | -3.990247 | 1.716222  |
| 75 | 1 | 0 | 3.664877  | -2.424713 | 2.131291  |
| 76 | 6 | 0 | 1.247568  | -0.686154 | 2.846745  |
| 77 | 1 | 0 | 0.421946  | -1.397091 | 2.921001  |
| 78 | 1 | 0 | 2.164992  | -1.167973 | 3.200403  |
| 79 | 1 | 0 | 1.041831  | 0.170556  | 3.488534  |
| 80 | 6 | 0 | -4.855893 | -2.853004 | -0.047002 |
| 81 | 1 | 0 | -5.861466 | -2.592803 | 0.289239  |
| 82 | 1 | 0 | -4.945308 | -3.256437 | -1.058806 |
| 83 | 1 | 0 | -4.508510 | -3.655609 | 0.603431  |
| 84 | 1 | 0 | 4.399907  | 6.309136  | -0.586056 |
| 85 | 1 | 0 | 3.856282  | 5.677971  | 0.999040  |
| 86 | 1 | 0 | 5.592304  | 5.796999  | 0.647056  |

---

## 6

| Center<br>Number | Atomic<br>Number | Atomic<br>Type | Coordinates (Angstroms) |           |           |
|------------------|------------------|----------------|-------------------------|-----------|-----------|
|                  |                  |                | X                       | Y         | Z         |
| 1                | 6                | 0              | -0.857634               | 0.150912  | -1.032277 |
| 2                | 6                | 0              | 0.513337                | 0.811110  | -0.788748 |
| 3                | 1                | 0              | -0.838355               | -0.255553 | -2.044194 |
| 4                | 1                | 0              | -1.629043               | 0.925683  | -1.023373 |
| 5                | 1                | 0              | 0.513717                | 1.390805  | 0.135891  |
| 6                | 1                | 0              | 0.699456                | 1.509700  | -1.608679 |
| 7                | 6                | 0              | 3.760618                | -1.143050 | 0.008584  |
| 8                | 6                | 0              | 2.620644                | -2.157894 | 0.239632  |
| 9                | 6                | 0              | 1.369749                | -1.237008 | 0.425722  |
| 10               | 6                | 0              | 1.596674                | -0.263734 | -0.748158 |
| 11               | 6                | 0              | 2.971126                | -3.144489 | 1.333092  |
| 12               | 1                | 0              | 2.415235                | -2.752327 | -0.652600 |
| 13               | 8                | 0              | 1.465163                | -0.437989 | 1.622286  |
| 14               | 6                | 0              | -1.815085               | -3.340312 | 0.228779  |
| 15               | 6                | 0              | -2.286299               | -2.061520 | -0.531116 |
| 16               | 6                | 0              | -1.221864               | -0.964635 | -0.014908 |
| 17               | 6                | 0              | 0.000009                | -1.856815 | 0.292183  |
| 18               | 6                | 0              | -0.344887               | -3.132632 | 0.436323  |
| 19               | 1                | 0              | -2.321164               | -3.443099 | 1.197412  |
| 20               | 1                | 0              | -2.035667               | -4.254318 | -0.328997 |
| 21               | 6                | 0              | -2.108415               | -2.346202 | -2.036259 |
| 22               | 6                | 0              | -1.689454               | -0.292158 | 1.297704  |
| 23               | 1                | 0              | 0.334633                | -3.935833 | 0.690127  |
| 24               | 1                | 0              | -2.404669               | -1.508009 | -2.667351 |
| 25               | 1                | 0              | -1.068978               | -2.585672 | -2.268236 |
| 26               | 1                | 0              | -2.710088               | -3.207248 | -2.332947 |
| 27               | 1                | 0              | -0.904935               | 0.352609  | 1.690820  |
| 28               | 1                | 0              | -2.578481               | 0.320928  | 1.145185  |
| 29               | 1                | 0              | -1.924949               | -1.028406 | 2.068522  |
| 30               | 6                | 0              | -3.783998               | -1.747617 | -0.208194 |
| 31               | 6                | 0              | -4.339245               | -0.531913 | -0.982350 |
| 32               | 6                | 0              | -5.648239               | 0.036688  | -0.439225 |
| 33               | 6                | 0              | -6.154581               | 1.285220  | -1.185762 |
| 34               | 6                | 0              | -5.619825               | 2.453777  | -0.351844 |
| 35               | 6                | 0              | -5.445841               | 1.833348  | 1.031596  |
| 36               | 8                | 0              | -5.470653               | 0.478727  | 0.937997  |
| 37               | 1                | 0              | -6.414163               | -0.736529 | -0.397628 |
| 38               | 1                | 0              | -7.247380               | 1.302813  | -1.188455 |
| 39               | 1                | 0              | -5.819081               | 1.303903  | -2.223045 |
| 40               | 1                | 0              | -4.607414               | 2.715795  | -0.681877 |
| 41               | 6                | 0              | -6.471203               | 3.719088  | -0.331040 |
| 42               | 1                | 0              | -3.834164               | -1.503519 | 0.854487  |
| 43               | 1                | 0              | -4.522032               | -0.811248 | -2.025589 |
| 44               | 1                | 0              | -3.604298               | 0.275441  | -1.005867 |
| 45               | 8                | 0              | -5.293342               | 2.399636  | 2.076922  |
| 46               | 1                | 0              | -6.055025               | 4.447504  | 0.365587  |
| 47               | 1                | 0              | -6.514270               | 4.172462  | -1.323540 |
| 48               | 1                | 0              | -7.492793               | 3.496255  | -0.014171 |
| 49               | 1                | 0              | 1.437805                | -0.882423 | -1.639805 |
| 50               | 6                | 0              | 3.118281                | 0.095542  | -0.771972 |
| 51               | 6                | 0              | 3.574493                | 0.168203  | -2.238064 |

|    |   |   |           |           |           |
|----|---|---|-----------|-----------|-----------|
| 52 | 6 | 0 | 3.514327  | 1.386667  | -0.005451 |
| 53 | 1 | 0 | 4.611500  | 0.496724  | -2.336068 |
| 54 | 1 | 0 | 3.492494  | -0.805153 | -2.724182 |
| 55 | 1 | 0 | 2.952921  | 0.869052  | -2.801203 |
| 56 | 6 | 0 | 3.224180  | 2.733602  | -0.674346 |
| 57 | 6 | 0 | 3.867698  | 3.887877  | 0.064609  |
| 58 | 8 | 0 | 4.799585  | 3.810411  | 0.826201  |
| 59 | 8 | 0 | 3.275622  | 5.058921  | -0.259898 |
| 60 | 6 | 0 | 3.843088  | 6.233552  | 0.346958  |
| 61 | 6 | 0 | 5.043182  | -1.725115 | -0.556741 |
| 62 | 1 | 0 | 4.017071  | -0.756617 | 1.001218  |
| 63 | 6 | 0 | 5.103443  | -2.887844 | -1.206415 |
| 64 | 6 | 0 | 6.300134  | -0.930196 | -0.301079 |
| 65 | 1 | 0 | 6.048547  | -3.268681 | -1.576155 |
| 66 | 1 | 0 | 4.236102  | -3.507840 | -1.391890 |
| 67 | 1 | 0 | 6.452929  | -0.781597 | 0.772744  |
| 68 | 1 | 0 | 7.177649  | -1.436663 | -0.704523 |
| 69 | 1 | 0 | 6.252243  | 0.066686  | -0.746846 |
| 70 | 1 | 0 | 2.160086  | 2.945638  | -0.765215 |
| 71 | 1 | 0 | 3.627933  | 2.767711  | -1.691677 |
| 72 | 1 | 0 | 4.589575  | 1.351156  | 0.179914  |
| 73 | 1 | 0 | 3.041025  | 1.365386  | 0.977166  |
| 74 | 8 | 0 | 2.563520  | -4.279104 | 1.395954  |
| 75 | 1 | 0 | 3.683549  | -2.773114 | 2.098760  |
| 76 | 6 | 0 | 1.282156  | -1.086612 | 2.872916  |
| 77 | 1 | 0 | 0.485182  | -1.832584 | 2.836360  |
| 78 | 1 | 0 | 2.204408  | -1.567459 | 3.215876  |
| 79 | 1 | 0 | 1.012697  | -0.311279 | 3.590420  |
| 80 | 6 | 0 | -4.702023 | -2.965783 | -0.423615 |
| 81 | 1 | 0 | -5.715892 | -2.753661 | -0.078820 |
| 82 | 1 | 0 | -4.768985 | -3.247608 | -1.477469 |
| 83 | 1 | 0 | -4.359171 | -3.836841 | 0.134467  |
| 84 | 1 | 0 | 4.886675  | 6.347475  | 0.054206  |
| 85 | 1 | 0 | 3.249001  | 7.066404  | -0.020558 |
| 86 | 1 | 0 | 3.782115  | 6.167996  | 1.432876  |

---

| Center<br>Number | Atomic<br>Number | Atomic<br>Type | Coordinates (Angstroms) |           |           |
|------------------|------------------|----------------|-------------------------|-----------|-----------|
|                  |                  |                | X                       | Y         | Z         |
| 1                | 6                | 0              | -0.924903               | 0.011901  | -1.177021 |
| 2                | 6                | 0              | 0.444041                | 0.721896  | -1.162555 |
| 3                | 1                | 0              | -0.970014               | -0.564299 | -2.101631 |
| 4                | 1                | 0              | -1.714112               | 0.765482  | -1.241738 |
| 5                | 1                | 0              | 0.494109                | 1.469098  | -0.369765 |
| 6                | 1                | 0              | 0.565806                | 1.255001  | -2.109670 |
| 7                | 6                | 0              | 3.788214                | -0.929572 | -0.207321 |
| 8                | 6                | 0              | 2.718065                | -1.922392 | 0.302495  |
| 9                | 6                | 0              | 1.433071                | -1.031671 | 0.371392  |
| 10               | 6                | 0              | 1.537912                | -0.327394 | -0.995316 |
| 11               | 6                | 0              | 3.168916                | -2.641330 | 1.555622  |
| 12               | 1                | 0              | 2.502587                | -2.698415 | -0.435058 |
| 13               | 8                | 0              | 1.556332                | -0.003665 | 1.374631  |
| 14               | 6                | 0              | -1.677979               | -3.216022 | 0.764095  |
| 15               | 6                | 0              | -2.228041               | -2.122098 | -0.203020 |
| 16               | 6                | 0              | -1.186511               | -0.914645 | 0.045139  |
| 17               | 6                | 0              | 0.082670                | -1.700192 | 0.448250  |
| 18               | 6                | 0              | -0.208434               | -2.932322 | 0.853283  |
| 19               | 1                | 0              | -2.139148               | -3.144326 | 1.757860  |
| 20               | 1                | 0              | -1.888185               | -4.226278 | 0.403236  |
| 21               | 6                | 0              | -2.100720               | -2.684566 | -1.633061 |
| 22               | 6                | 0              | -1.617327               | -0.028276 | 1.237778  |
| 23               | 1                | 0              | 0.511345                | -3.652704 | 1.220520  |
| 24               | 1                | 0              | -2.458936               | -1.994684 | -2.397472 |
| 25               | 1                | 0              | -1.062762               | -2.928972 | -1.866018 |
| 26               | 1                | 0              | -2.678135               | -3.605730 | -1.728742 |
| 27               | 1                | 0              | -0.846558               | 0.709712  | 1.455753  |
| 28               | 1                | 0              | -2.541194               | 0.511718  | 1.028381  |
| 29               | 1                | 0              | -1.775325               | -0.615858 | 2.144018  |
| 30               | 6                | 0              | -3.723058               | -1.798883 | 0.124389  |
| 31               | 6                | 0              | -4.351938               | -0.760003 | -0.829673 |
| 32               | 6                | 0              | -5.662177               | -0.144532 | -0.343740 |
| 33               | 6                | 0              | -6.234744               | 0.941653  | -1.273442 |
| 34               | 6                | 0              | -5.715231               | 2.251452  | -0.671877 |
| 35               | 6                | 0              | -5.475852               | 1.883550  | 0.789832  |
| 36               | 8                | 0              | -5.456834               | 0.532852  | 0.930260  |
| 37               | 1                | 0              | -6.399045               | -0.920822 | -0.141678 |
| 38               | 1                | 0              | -7.327010               | 0.927110  | -1.238776 |
| 39               | 1                | 0              | -5.932577               | 0.791169  | -2.310199 |
| 40               | 1                | 0              | -4.723847               | 2.482750  | -1.079272 |
| 41               | 6                | 0              | -6.609954               | 3.475754  | -0.836181 |
| 42               | 1                | 0              | -3.742404               | -1.370334 | 1.128066  |
| 43               | 1                | 0              | -4.559778               | -1.226888 | -1.798531 |
| 44               | 1                | 0              | -3.649911               | 0.052684  | -1.026434 |
| 45               | 8                | 0              | -5.309560               | 2.625152  | 1.716686  |
| 46               | 1                | 0              | -6.198546               | 4.325109  | -0.289911 |
| 47               | 1                | 0              | -6.699654               | 3.750544  | -1.889215 |
| 48               | 1                | 0              | -7.612771               | 3.280245  | -0.448965 |
| 49               | 1                | 0              | 1.288196                | -1.121666 | -1.707806 |
| 50               | 6                | 0              | 3.049291                | -0.008699 | -1.270924 |
| 51               | 6                | 0              | 3.352416                | -0.452442 | -2.715860 |

|    |   |   |           |           |           |
|----|---|---|-----------|-----------|-----------|
| 52 | 6 | 0 | 3.428788  | 1.492107  | -1.192518 |
| 53 | 1 | 0 | 4.389670  | -0.262233 | -2.997078 |
| 54 | 1 | 0 | 3.163178  | -1.517988 | -2.857447 |
| 55 | 1 | 0 | 2.715897  | 0.097406  | -3.415147 |
| 56 | 6 | 0 | 3.417100  | 2.195462  | 0.164624  |
| 57 | 6 | 0 | 3.562670  | 3.694875  | 0.036113  |
| 58 | 8 | 0 | 3.428858  | 4.339873  | -0.974772 |
| 59 | 8 | 0 | 3.848067  | 4.254592  | 1.233725  |
| 60 | 6 | 0 | 3.958274  | 5.688528  | 1.241343  |
| 61 | 6 | 0 | 5.102727  | -1.552873 | -0.636284 |
| 62 | 1 | 0 | 4.021654  | -0.289090 | 0.648949  |
| 63 | 6 | 0 | 5.245527  | -2.842793 | -0.940849 |
| 64 | 6 | 0 | 6.292199  | -0.625217 | -0.660340 |
| 65 | 1 | 0 | 6.211622  | -3.242173 | -1.227335 |
| 66 | 1 | 0 | 4.426477  | -3.549894 | -0.916869 |
| 67 | 1 | 0 | 7.201267  | -1.151092 | -0.953785 |
| 68 | 1 | 0 | 6.144284  | 0.206356  | -1.354385 |
| 69 | 1 | 0 | 6.458105  | -0.181716 | 0.327093  |
| 70 | 1 | 0 | 4.214204  | 1.844230  | 0.823404  |
| 71 | 1 | 0 | 2.490532  | 2.005321  | 0.710091  |
| 72 | 1 | 0 | 2.764961  | 2.040499  | -1.864109 |
| 73 | 1 | 0 | 4.424550  | 1.616193  | -1.627441 |
| 74 | 8 | 0 | 2.805591  | -3.744333 | 1.885701  |
| 75 | 1 | 0 | 3.909832  | -2.096947 | 2.177116  |
| 76 | 6 | 0 | 1.456853  | -0.386526 | 2.739579  |
| 77 | 1 | 0 | 1.210522  | 0.515934  | 3.299552  |
| 78 | 1 | 0 | 0.674955  | -1.131369 | 2.900785  |
| 79 | 1 | 0 | 2.405908  | -0.779162 | 3.118937  |
| 80 | 6 | 0 | -4.603655 | -3.062185 | 0.172767  |
| 81 | 1 | 0 | -5.609469 | -2.820208 | 0.521374  |
| 82 | 1 | 0 | -4.703769 | -3.530562 | -0.809672 |
| 83 | 1 | 0 | -4.208147 | -3.809247 | 0.860897  |
| 84 | 1 | 0 | 4.758302  | 6.012935  | 0.576294  |
| 85 | 1 | 0 | 3.021629  | 6.144537  | 0.921290  |
| 86 | 1 | 0 | 4.182816  | 5.957593  | 2.270384  |

---



| Center<br>Number | Atomic<br>Number | Atomic<br>Type | Coordinates (Angstroms) |           |           |
|------------------|------------------|----------------|-------------------------|-----------|-----------|
|                  |                  |                | X                       | Y         | Z         |
| 1                | 6                | 0              | -1.074232               | 0.190310  | -1.137443 |
| 2                | 6                | 0              | 0.320541                | 0.836044  | -1.027078 |
| 3                | 1                | 0              | -1.099282               | -0.356090 | -2.080807 |
| 4                | 1                | 0              | -1.825779               | 0.980389  | -1.216596 |
| 5                | 1                | 0              | 0.369258                | 1.536051  | -0.192213 |
| 6                | 1                | 0              | 0.509343                | 1.414322  | -1.936688 |
| 7                | 6                | 0              | 3.548218                | -1.124894 | -0.137926 |
| 8                | 6                | 0              | 2.378067                | -2.025112 | 0.350650  |
| 9                | 6                | 0              | 1.167646                | -1.039897 | 0.446904  |
| 10               | 6                | 0              | 1.367889                | -0.261002 | -0.869252 |
| 11               | 6                | 0              | 2.769746                | -2.811699 | 1.580115  |
| 12               | 1                | 0              | 2.102571                | -2.761441 | -0.405516 |
| 13               | 8                | 0              | 1.335857                | -0.084242 | 1.511891  |
| 14               | 6                | 0              | -2.073203               | -3.055029 | 0.652381  |
| 15               | 6                | 0              | -2.532350               | -1.892890 | -0.283302 |
| 16               | 6                | 0              | -1.432092               | -0.758197 | 0.040602  |
| 17               | 6                | 0              | -0.222650               | -1.628297 | 0.448926  |
| 18               | 6                | 0              | -0.593743               | -2.856796 | 0.795418  |
| 19               | 1                | 0              | -2.560901               | -2.997880 | 1.634332  |
| 20               | 1                | 0              | -2.326828               | -4.036713 | 0.243635  |
| 21               | 6                | 0              | -2.397824               | -2.405230 | -1.731401 |
| 22               | 6                | 0              | -1.845458               | 0.110009  | 1.252616  |
| 23               | 1                | 0              | 0.072665                | -3.631564 | 1.153171  |
| 24               | 1                | 0              | -2.690656               | -1.664678 | -2.476113 |
| 25               | 1                | 0              | -1.370607               | -2.705244 | -1.946709 |
| 26               | 1                | 0              | -3.027972               | -3.283887 | -1.879613 |
| 27               | 1                | 0              | -1.031681               | 0.777982  | 1.531089  |
| 28               | 1                | 0              | -2.717031               | 0.727230  | 1.031130  |
| 29               | 1                | 0              | -2.084129               | -0.498829 | 2.126487  |
| 30               | 6                | 0              | -4.014420               | -1.496439 | 0.019680  |
| 31               | 6                | 0              | -4.552117               | -0.378011 | -0.898578 |
| 32               | 6                | 0              | -5.861967               | 0.262623  | -0.443512 |
| 33               | 6                | 0              | -6.313106               | 1.456769  | -1.305472 |
| 34               | 6                | 0              | -5.778034               | 2.677290  | -0.549845 |
| 35               | 6                | 0              | -5.669028               | 2.168555  | 0.884659  |
| 36               | 8                | 0              | -5.716914               | 0.810879  | 0.898444  |
| 37               | 1                | 0              | -6.647782               | -0.487561 | -0.365335 |
| 38               | 1                | 0              | -7.404453               | 1.497859  | -1.348047 |
| 39               | 1                | 0              | -5.942565               | 1.384020  | -2.328336 |
| 40               | 1                | 0              | -4.748009               | 2.887526  | -0.861547 |
| 41               | 6                | 0              | -6.595613               | 3.959688  | -0.663916 |
| 42               | 1                | 0              | -4.037102               | -1.113592 | 1.041441  |
| 43               | 1                | 0              | -4.728288               | -0.776089 | -1.903813 |
| 44               | 1                | 0              | -3.808615               | 0.413751  | -1.010663 |
| 45               | 8                | 0              | -5.545220               | 2.814284  | 1.886624  |
| 46               | 1                | 0              | -6.184831               | 4.732778  | -0.013777 |
| 47               | 1                | 0              | -6.591480               | 4.331237  | -1.690767 |
| 48               | 1                | 0              | -7.633365               | 3.788063  | -0.368301 |
| 49               | 1                | 0              | 1.153990                | -1.001384 | -1.649980 |
| 50               | 6                | 0              | 2.889490                | 0.047857  | -1.002417 |
| 51               | 6                | 0              | 3.285077                | 0.040566  | -2.489055 |

|    |   |   |           |           |           |
|----|---|---|-----------|-----------|-----------|
| 52 | 6 | 0 | 3.233664  | 1.435265  | -0.400925 |
| 53 | 1 | 0 | 4.367039  | 0.049014  | -2.626775 |
| 54 | 1 | 0 | 2.893968  | -0.832276 | -3.013311 |
| 55 | 1 | 0 | 2.879069  | 0.924858  | -2.988262 |
| 56 | 6 | 0 | 4.704830  | 1.847821  | -0.469598 |
| 57 | 6 | 0 | 4.938708  | 3.245834  | 0.059315  |
| 58 | 8 | 0 | 4.094543  | 4.089282  | 0.231968  |
| 59 | 8 | 0 | 6.252533  | 3.456001  | 0.302830  |
| 60 | 6 | 0 | 6.597128  | 4.773635  | 0.765412  |
| 61 | 6 | 0 | 4.690106  | -1.924726 | -0.748317 |
| 62 | 1 | 0 | 3.956188  | -0.643377 | 0.754105  |
| 63 | 6 | 0 | 5.950285  | -1.703022 | -0.373169 |
| 64 | 6 | 0 | 4.377468  | -3.028767 | -1.730775 |
| 65 | 1 | 0 | 6.774473  | -2.269618 | -0.791402 |
| 66 | 1 | 0 | 6.205701  | -0.955658 | 0.369088  |
| 67 | 1 | 0 | 5.289353  | -3.392708 | -2.205334 |
| 68 | 1 | 0 | 3.907166  | -3.878813 | -1.226935 |
| 69 | 1 | 0 | 3.691501  | -2.708176 | -2.516231 |
| 70 | 1 | 0 | 5.079296  | 1.844498  | -1.498236 |
| 71 | 1 | 0 | 5.356291  | 1.168165  | 0.081085  |
| 72 | 1 | 0 | 2.904724  | 1.465372  | 0.637339  |
| 73 | 1 | 0 | 2.649581  | 2.194949  | -0.924775 |
| 74 | 8 | 0 | 2.418337  | -3.943693 | 1.812324  |
| 75 | 1 | 0 | 3.462673  | -2.295974 | 2.276252  |
| 76 | 6 | 0 | 1.122879  | -0.517325 | 2.848353  |
| 77 | 1 | 0 | 0.948547  | 0.381611  | 3.439943  |
| 78 | 1 | 0 | 0.256583  | -1.176048 | 2.935588  |
| 79 | 1 | 0 | 2.000733  | -1.031244 | 3.253064  |
| 80 | 6 | 0 | -4.968302 | -2.705959 | -0.013482 |
| 81 | 1 | 0 | -5.961864 | -2.425813 | 0.341121  |
| 82 | 1 | 0 | -5.083572 | -3.111103 | -1.022128 |
| 83 | 1 | 0 | -4.623569 | -3.513160 | 0.632668  |
| 84 | 1 | 0 | 7.675649  | 4.761509  | 0.901036  |
| 85 | 1 | 0 | 6.311228  | 5.523541  | 0.028098  |
| 86 | 1 | 0 | 6.094076  | 4.990263  | 1.707486  |

---

| Center<br>Number | Atomic<br>Number | Atomic<br>Type | Coordinates (Angstroms) |           |           |
|------------------|------------------|----------------|-------------------------|-----------|-----------|
|                  |                  |                | X                       | Y         | Z         |
| 1                | 6                | 0              | -1.066679               | 0.127531  | -1.144170 |
| 2                | 6                | 0              | 0.309751                | 0.818421  | -1.099480 |
| 3                | 1                | 0              | -1.095549               | -0.464479 | -2.059460 |
| 4                | 1                | 0              | -1.844279               | 0.889351  | -1.241860 |
| 5                | 1                | 0              | 0.357481                | 1.554511  | -0.295900 |
| 6                | 1                | 0              | 0.457161                | 1.360751  | -2.038060 |
| 7                | 6                | 0              | 3.617261                | -1.025969 | -0.237910 |
| 8                | 6                | 0              | 2.484201                | -1.928939 | 0.332740  |
| 9                | 6                | 0              | 1.253131                | -0.966089 | 0.430690  |
| 10               | 6                | 0              | 1.392181                | -0.241489 | -0.923480 |
| 11               | 6                | 0              | 2.944661                | -2.642909 | 1.577880  |
| 12               | 1                | 0              | 2.198941                | -2.703949 | -0.379540 |
| 13               | 8                | 0              | 1.430861                | 0.036321  | 1.450500  |
| 14               | 6                | 0              | -1.926949               | -3.049349 | 0.831950  |
| 15               | 6                | 0              | -2.441269               | -1.950659 | -0.149890 |
| 16               | 6                | 0              | -1.365109               | -0.772619 | 0.086810  |
| 17               | 6                | 0              | -0.120599               | -1.588299 | 0.502530  |
| 18               | 6                | 0              | -0.450229               | -2.806339 | 0.920600  |
| 19               | 1                | 0              | -2.387569               | -2.951569 | 1.823570  |
| 20               | 1                | 0              | -2.165919               | -4.056919 | 0.482220  |
| 21               | 6                | 0              | -2.325859               | -2.532149 | -1.573420 |
| 22               | 6                | 0              | -1.770279               | 0.140861  | 1.268080  |
| 23               | 1                | 0              | 0.244941                | -3.546169 | 1.296800  |
| 24               | 1                | 0              | -2.657669               | -1.838359 | -2.345960 |
| 25               | 1                | 0              | -1.294889               | -2.811349 | -1.798560 |
| 26               | 1                | 0              | -2.932659               | -3.434959 | -1.662000 |
| 27               | 1                | 0              | -0.971249               | 0.847241  | 1.490190  |
| 28               | 1                | 0              | -2.667119               | 0.718061  | 1.039780  |
| 29               | 1                | 0              | -1.963799               | -0.433009 | 2.176120  |
| 30               | 6                | 0              | -3.927009               | -1.579229 | 0.169500  |
| 31               | 6                | 0              | -4.518719               | -0.533509 | -0.800050 |
| 32               | 6                | 0              | -5.839789               | 0.091801  | -0.362470 |
| 33               | 6                | 0              | -6.366599               | 1.186141  | -1.306790 |
| 34               | 6                | 0              | -5.861779               | 2.490661  | -0.679960 |
| 35               | 6                | 0              | -5.689839               | 2.115031  | 0.785150  |
| 36               | 8                | 0              | -5.675629               | 0.772231  | 0.925980  |
| 37               | 1                | 0              | -6.591309               | -0.674689 | -0.183770 |
| 38               | 1                | 0              | -7.458939               | 1.179041  | -1.316090 |
| 39               | 1                | 0              | -6.021529               | 1.040151  | -2.330040 |
| 40               | 1                | 0              | -4.850449               | 2.711281  | -1.041280 |
| 41               | 6                | 0              | -6.737289               | 3.722001  | -0.889860 |
| 42               | 1                | 0              | -3.934319               | -1.139749 | 1.168900  |
| 43               | 1                | 0              | -4.703639               | -0.996939 | -1.774540 |
| 44               | 1                | 0              | -3.804349               | 0.272881  | -0.976960 |
| 45               | 8                | 0              | -5.564609               | 2.852391  | 1.730360  |
| 46               | 1                | 0              | -6.334369               | 4.579611  | -0.349940 |
| 47               | 1                | 0              | -6.786989               | 3.976681  | -1.950150 |
| 48               | 1                | 0              | -7.754759               | 3.542571  | -0.534990 |
| 49               | 1                | 0              | 1.176891                | -1.020619 | -1.664400 |
| 50               | 6                | 0              | 2.899631                | 0.097741  | -1.120060 |
| 51               | 6                | 0              | 3.244021                | 0.054591  | -2.618160 |

|    |   |   |           |           |           |
|----|---|---|-----------|-----------|-----------|
| 52 | 6 | 0 | 3.232641  | 1.511181  | -0.573200 |
| 53 | 1 | 0 | 4.320001  | 0.084001  | -2.793770 |
| 54 | 1 | 0 | 2.854051  | -0.841889 | -3.100740 |
| 55 | 1 | 0 | 2.801851  | 0.914981  | -3.127980 |
| 56 | 6 | 0 | 4.695521  | 1.967051  | -0.753360 |
| 57 | 6 | 0 | 4.877931  | 3.352880  | -0.186920 |
| 58 | 8 | 0 | 4.581751  | 4.379341  | -0.757770 |
| 59 | 8 | 0 | 5.387681  | 3.327060  | 1.059110  |
| 60 | 6 | 0 | 5.552281  | 4.605320  | 1.706360  |
| 61 | 6 | 0 | 4.750031  | -1.828409 | -0.862240 |
| 62 | 1 | 0 | 4.051511  | -0.502619 | 0.616780  |
| 63 | 6 | 0 | 6.017361  | -1.577450 | -0.529510 |
| 64 | 6 | 0 | 4.424831  | -2.962279 | -1.805520 |
| 65 | 1 | 0 | 6.837681  | -2.142890 | -0.957330 |
| 66 | 1 | 0 | 6.280661  | -0.805860 | 0.184980  |
| 67 | 1 | 0 | 5.327611  | -3.324920 | -2.298080 |
| 68 | 1 | 0 | 3.983671  | -3.805629 | -1.265370 |
| 69 | 1 | 0 | 3.708681  | -2.673839 | -2.575910 |
| 70 | 1 | 0 | 4.956211  | 2.016440  | -1.810550 |
| 71 | 1 | 0 | 5.383101  | 1.283640  | -0.257820 |
| 72 | 1 | 0 | 2.972661  | 1.550831  | 0.484550  |
| 73 | 1 | 0 | 2.594871  | 2.236611  | -1.084860 |
| 74 | 8 | 0 | 2.679691  | -3.793169 | 1.850540  |
| 75 | 1 | 0 | 3.606681  | -2.061259 | 2.247940  |
| 76 | 6 | 0 | 1.259081  | -0.343499 | 2.810670  |
| 77 | 1 | 0 | 2.156841  | -0.821779 | 3.214170  |
| 78 | 1 | 0 | 1.081201  | 0.575971  | 3.368480  |
| 79 | 1 | 0 | 0.408011  | -1.013039 | 2.946850  |
| 80 | 6 | 0 | -4.843629 | -2.816259 | 0.230930  |
| 81 | 1 | 0 | -5.838979 | -2.543779 | 0.586610  |
| 82 | 1 | 0 | -4.965069 | -3.285139 | -0.748720 |
| 83 | 1 | 0 | -4.462739 | -3.570999 | 0.918920  |
| 84 | 1 | 0 | 5.971201  | 4.383750  | 2.684020  |
| 85 | 1 | 0 | 6.231211  | 5.234820  | 1.132720  |
| 86 | 1 | 0 | 4.589761  | 5.105291  | 1.806570  |

---

| Center<br>Number | Atomic<br>Number | Atomic<br>Type | Coordinates (Angstroms) |           |           |
|------------------|------------------|----------------|-------------------------|-----------|-----------|
|                  |                  |                | X                       | Y         | Z         |
| 1                | 6                | 0              | -1.056794               | 0.084571  | -1.173516 |
| 2                | 6                | 0              | 0.323787                | 0.765684  | -1.117519 |
| 3                | 1                | 0              | -1.084454               | -0.505933 | -2.090063 |
| 4                | 1                | 0              | -1.827368               | 0.853401  | -1.275782 |
| 5                | 1                | 0              | 0.369163                | 1.498478  | -0.311187 |
| 6                | 1                | 0              | 0.480629                | 1.311743  | -2.052628 |
| 7                | 6                | 0              | 3.611897                | -1.100081 | -0.231620 |
| 8                | 6                | 0              | 2.470137                | -1.994933 | 0.318043  |
| 9                | 6                | 0              | 1.241942                | -1.034942 | 0.409728  |
| 10               | 6                | 0              | 1.400011                | -0.300150 | -0.936157 |
| 11               | 6                | 0              | 2.906273                | -2.745383 | 1.558062  |
| 12               | 1                | 0              | 2.180233                | -2.757117 | -0.405081 |
| 13               | 8                | 0              | 1.411113                | -0.038860 | 1.438266  |
| 14               | 6                | 0              | -1.960308               | -3.090129 | 0.780044  |
| 15               | 6                | 0              | -2.462257               | -1.976517 | -0.190798 |
| 16               | 6                | 0              | -1.370537               | -0.814703 | 0.054115  |
| 17               | 6                | 0              | -0.137054               | -1.648416 | 0.466267  |
| 18               | 6                | 0              | -0.480494               | -2.866925 | 0.872517  |
| 19               | 1                | 0              | -2.419596               | -2.996153 | 1.772811  |
| 20               | 1                | 0              | -2.211963               | -4.091793 | 0.421740  |
| 21               | 6                | 0              | -2.358669               | -2.548212 | -1.619093 |
| 22               | 6                | 0              | -1.764850               | 0.099391  | 1.238404  |
| 23               | 1                | 0              | 0.206631                | -3.616104 | 1.244726  |
| 24               | 1                | 0              | -2.681329               | -1.843735 | -2.386102 |
| 25               | 1                | 0              | -1.332878               | -2.842336 | -1.848587 |
| 26               | 1                | 0              | -2.978940               | -3.441243 | -1.714461 |
| 27               | 1                | 0              | -0.955041               | 0.791040  | 1.466413  |
| 28               | 1                | 0              | -2.653264               | 0.691804  | 1.016454  |
| 29               | 1                | 0              | -1.968071               | -0.476094 | 2.143335  |
| 30               | 6                | 0              | -3.941179               | -1.586272 | 0.135143  |
| 31               | 6                | 0              | -4.523782               | -0.526969 | -0.825350 |
| 32               | 6                | 0              | -5.815560               | 0.136178  | -0.352664 |
| 33               | 6                | 0              | -6.333612               | 1.247528  | -1.284565 |
| 34               | 6                | 0              | -5.772710               | 2.533546  | -0.669294 |
| 35               | 6                | 0              | -5.569949               | 2.150492  | 0.794096  |
| 36               | 8                | 0              | -5.601475               | 0.799218  | 0.927308  |
| 37               | 1                | 0              | -6.584061               | -0.612354 | -0.164272 |
| 38               | 1                | 0              | -7.426036               | 1.274607  | -1.264963 |
| 39               | 1                | 0              | -6.023060               | 1.090385  | -2.317852 |
| 40               | 1                | 0              | -4.766665               | 2.726845  | -1.060345 |
| 41               | 6                | 0              | -6.615620               | 3.792854  | -0.841752 |
| 42               | 1                | 0              | -3.940377               | -1.149628 | 1.135558  |
| 43               | 1                | 0              | -4.739788               | -0.986528 | -1.795923 |
| 44               | 1                | 0              | -3.790836               | 0.259545  | -1.016326 |
| 45               | 8                | 0              | -5.391660               | 2.881128  | 1.727344  |
| 46               | 1                | 0              | -6.179443               | 4.623065  | -0.285346 |
| 47               | 1                | 0              | -6.678065               | 4.075206  | -1.894770 |
| 48               | 1                | 0              | -7.631281               | 3.635838  | -0.470820 |
| 49               | 1                | 0              | 1.195308                | -1.072196 | -1.687980 |
| 50               | 6                | 0              | 2.912733                | 0.045258  | -1.104716 |
| 51               | 6                | 0              | 3.268487                | -0.019213 | -2.597606 |

|    |   |   |           |           |           |
|----|---|---|-----------|-----------|-----------|
| 52 | 6 | 0 | 3.201588  | 1.466370  | -0.554439 |
| 53 | 1 | 0 | 4.319237  | 0.199245  | -2.790985 |
| 54 | 1 | 0 | 3.062358  | -1.006317 | -3.013473 |
| 55 | 1 | 0 | 2.676378  | 0.712842  | -3.153725 |
| 56 | 6 | 0 | 4.663006  | 1.949981  | -0.594985 |
| 57 | 6 | 0 | 4.740770  | 3.387418  | -0.135629 |
| 58 | 8 | 0 | 4.366742  | 4.337968  | -0.778034 |
| 59 | 8 | 0 | 5.263865  | 3.493658  | 1.105671  |
| 60 | 6 | 0 | 5.339788  | 4.829736  | 1.635411  |
| 61 | 6 | 0 | 4.742632  | -1.889295 | -0.881457 |
| 62 | 1 | 0 | 4.050046  | -0.595481 | 0.636510  |
| 63 | 6 | 0 | 4.581243  | -3.087918 | -1.442445 |
| 64 | 6 | 0 | 6.116001  | -1.266818 | -0.835316 |
| 65 | 1 | 0 | 5.422330  | -3.610247 | -1.883368 |
| 66 | 1 | 0 | 3.629827  | -3.600812 | -1.489585 |
| 67 | 1 | 0 | 6.866886  | -1.939155 | -1.251298 |
| 68 | 1 | 0 | 6.159035  | -0.329698 | -1.394976 |
| 69 | 1 | 0 | 6.402898  | -1.031002 | 0.194783  |
| 70 | 1 | 0 | 5.051807  | 1.928334  | -1.614637 |
| 71 | 1 | 0 | 5.302532  | 1.337558  | 0.038437  |
| 72 | 1 | 0 | 2.845564  | 1.520517  | 0.474413  |
| 73 | 1 | 0 | 2.609256  | 2.179728  | -1.132640 |
| 74 | 8 | 0 | 2.497712  | -3.832376 | 1.886843  |
| 75 | 1 | 0 | 3.685933  | -2.242808 | 2.168760  |
| 76 | 6 | 0 | 1.277108  | -0.446043 | 2.792300  |
| 77 | 1 | 0 | 1.103853  | 0.460633  | 3.372324  |
| 78 | 1 | 0 | 0.437085  | -1.128675 | 2.936294  |
| 79 | 1 | 0 | 2.189925  | -0.923495 | 3.163703  |
| 80 | 6 | 0 | -4.876375 | -2.809270 | 0.193743  |
| 81 | 1 | 0 | -5.867570 | -2.522734 | 0.550195  |
| 82 | 1 | 0 | -5.005151 | -3.275620 | -0.786373 |
| 83 | 1 | 0 | -4.508003 | -3.571404 | 0.880301  |
| 84 | 1 | 0 | 4.345585  | 5.271594  | 1.695430  |
| 85 | 1 | 0 | 5.774538  | 4.725747  | 2.626248  |
| 86 | 1 | 0 | 5.969919  | 5.453720  | 1.002218  |

---

| Center<br>Number | Atomic<br>Number | Atomic<br>Type | Coordinates (Angstroms) |           |           |
|------------------|------------------|----------------|-------------------------|-----------|-----------|
|                  |                  |                | X                       | Y         | Z         |
| 1                | 6                | 0              | -1.033548               | 0.162013  | -1.105224 |
| 2                | 6                | 0              | 0.345559                | 0.839687  | -0.987782 |
| 3                | 1                | 0              | -1.050884               | -0.363228 | -2.060694 |
| 4                | 1                | 0              | -1.804713               | 0.934921  | -1.160912 |
| 5                | 1                | 0              | 0.379866                | 1.518508  | -0.134774 |
| 6                | 1                | 0              | 0.513384                | 1.444725  | -1.884075 |
| 7                | 6                | 0              | 3.627108                | -1.067124 | -0.168394 |
| 8                | 6                | 0              | 2.480315                | -2.001532 | 0.311438  |
| 9                | 6                | 0              | 1.247790                | -1.047948 | 0.436354  |
| 10               | 6                | 0              | 1.421836                | -0.233647 | -0.861640 |
| 11               | 6                | 0              | 2.899168                | -2.805466 | 1.521293  |
| 12               | 1                | 0              | 2.215059                | -2.727991 | -0.457845 |
| 13               | 8                | 0              | 1.395960                | -0.111381 | 1.520737  |
| 14               | 6                | 0              | -1.940744               | -3.146776 | 0.614663  |
| 15               | 6                | 0              | -2.435986               | -1.974188 | -0.288388 |
| 16               | 6                | 0              | -1.360129               | -0.821035 | 0.053334  |
| 17               | 6                | 0              | -0.127483               | -1.670592 | 0.432332  |
| 18               | 6                | 0              | -0.465542               | -2.916141 | 0.750680  |
| 19               | 1                | 0              | -2.420124               | -3.125373 | 1.601984  |
| 20               | 1                | 0              | -2.174733               | -4.124081 | 0.184227  |
| 21               | 6                | 0              | -2.302554               | -2.448163 | -1.749667 |
| 22               | 6                | 0              | -1.786899               | 0.010357  | 1.286284  |
| 23               | 1                | 0              | 0.222731                | -3.682433 | 1.084558  |
| 24               | 1                | 0              | -2.616208               | -1.695628 | -2.473567 |
| 25               | 1                | 0              | -1.271181               | -2.721889 | -1.979694 |
| 26               | 1                | 0              | -2.915543               | -3.335803 | -1.915105 |
| 27               | 1                | 0              | -0.987621               | 0.691275  | 1.574863  |
| 28               | 1                | 0              | -2.675179               | 0.610062  | 1.083659  |
| 29               | 1                | 0              | -2.004131               | -0.623041 | 2.148345  |
| 30               | 6                | 0              | -3.924717               | -1.620143 | 0.034546  |
| 31               | 6                | 0              | -4.503186               | -0.510081 | -0.870372 |
| 32               | 6                | 0              | -5.788612               | 0.136789  | -0.359604 |
| 33               | 6                | 0              | -6.319773               | 1.277761  | -1.247414 |
| 34               | 6                | 0              | -5.750777               | 2.543374  | -0.598452 |
| 35               | 6                | 0              | -5.525857               | 2.112892  | 0.848346  |
| 36               | 8                | 0              | -5.556895               | 0.757943  | 0.938268  |
| 37               | 1                | 0              | -6.554331               | -0.617932 | -0.184816 |
| 38               | 1                | 0              | -7.411820               | 1.303346  | -1.211899 |
| 39               | 1                | 0              | -6.023538               | 1.154573  | -2.289446 |
| 40               | 1                | 0              | -4.750964               | 2.751147  | -0.997967 |
| 41               | 6                | 0              | -6.597411               | 3.806585  | -0.716226 |
| 42               | 1                | 0              | -3.947207               | -1.247108 | 1.059960  |
| 43               | 1                | 0              | -4.725597               | -0.921298 | -1.860989 |
| 44               | 1                | 0              | -3.766340               | 0.280526  | -1.026430 |
| 45               | 8                | 0              | -5.332105               | 2.812970  | 1.801665  |
| 46               | 1                | 0              | -6.154381               | 4.618065  | -0.137991 |
| 47               | 1                | 0              | -6.675170               | 4.124581  | -1.758018 |
| 48               | 1                | 0              | -7.607524               | 3.635407  | -0.336561 |
| 49               | 1                | 0              | 1.223823                | -0.959485 | -1.660018 |
| 50               | 6                | 0              | 2.935279                | 0.114961  | -0.992964 |
| 51               | 6                | 0              | 3.324003                | 0.169872  | -2.479723 |

|    |   |   |           |           |           |
|----|---|---|-----------|-----------|-----------|
| 52 | 6 | 0 | 3.253843  | 1.485683  | -0.340391 |
| 53 | 1 | 0 | 4.404898  | 0.207881  | -2.620328 |
| 54 | 1 | 0 | 2.949077  | -0.692609 | -3.031904 |
| 55 | 1 | 0 | 2.897497  | 1.062263  | -2.946570 |
| 56 | 6 | 0 | 4.719014  | 1.953749  | -0.454369 |
| 57 | 6 | 0 | 4.928345  | 3.217705  | 0.343173  |
| 58 | 8 | 0 | 5.292176  | 3.263476  | 1.492890  |
| 59 | 8 | 0 | 4.626802  | 4.319673  | -0.380450 |
| 60 | 6 | 0 | 4.749339  | 5.573124  | 0.314528  |
| 61 | 6 | 0 | 4.774472  | -1.832016 | -0.812737 |
| 62 | 1 | 0 | 4.039889  | -0.600808 | 0.729250  |
| 63 | 6 | 0 | 6.033532  | -1.608052 | -0.435024 |
| 64 | 6 | 0 | 4.469650  | -2.909200 | -1.827181 |
| 65 | 1 | 0 | 6.862043  | -2.152257 | -0.874028 |
| 66 | 1 | 0 | 6.283072  | -0.883509 | 0.331542  |
| 67 | 1 | 0 | 5.383816  | -3.249376 | -2.314770 |
| 68 | 1 | 0 | 4.010029  | -3.778890 | -1.347537 |
| 69 | 1 | 0 | 3.777958  | -2.573637 | -2.601384 |
| 70 | 1 | 0 | 4.986836  | 2.140940  | -1.494491 |
| 71 | 1 | 0 | 5.399087  | 1.206961  | -0.048184 |
| 72 | 1 | 0 | 2.974504  | 1.446701  | 0.712094  |
| 73 | 1 | 0 | 2.622833  | 2.246158  | -0.808470 |
| 74 | 8 | 0 | 2.565456  | -3.946285 | 1.735656  |
| 75 | 1 | 0 | 3.593722  | -2.293513 | 2.218105  |
| 76 | 6 | 0 | 1.218174  | -0.583198 | 2.849819  |
| 77 | 1 | 0 | 1.002078  | 0.291956  | 3.462761  |
| 78 | 1 | 0 | 0.388826  | -1.289009 | 2.928623  |
| 79 | 1 | 0 | 2.126670  | -1.056593 | 3.235147  |
| 80 | 6 | 0 | -4.846916 | -2.853866 | -0.002477 |
| 81 | 1 | 0 | -5.853221 | -2.596406 | 0.333634  |
| 82 | 1 | 0 | -4.936549 | -3.268745 | -1.009607 |
| 83 | 1 | 0 | -4.493062 | -3.647264 | 0.655745  |
| 84 | 1 | 0 | 4.473209  | 6.335959  | -0.409089 |
| 85 | 1 | 0 | 4.080360  | 5.598662  | 1.174448  |
| 86 | 1 | 0 | 5.773845  | 5.719830  | 0.655543  |

---



| Center<br>Number | Atomic<br>Number | Atomic<br>Type | Coordinates (Angstroms) |           |           |
|------------------|------------------|----------------|-------------------------|-----------|-----------|
|                  |                  |                | X                       | Y         | Z         |
| 1                | 6                | 0              | -0.872707               | 0.183452  | -1.107184 |
| 2                | 6                | 0              | 0.510392                | 0.827533  | -0.890369 |
| 3                | 1                | 0              | -0.856887               | -0.273819 | -2.097132 |
| 4                | 1                | 0              | -1.628176               | 0.972895  | -1.143082 |
| 5                | 1                | 0              | 0.521555                | 1.456885  | 0.000835  |
| 6                | 1                | 0              | 0.712225                | 1.476915  | -1.746095 |
| 7                | 6                | 0              | 3.711727                | -1.152339 | 0.024688  |
| 8                | 6                | 0              | 2.550188                | -2.133563 | 0.289961  |
| 9                | 6                | 0              | 1.318244                | -1.178475 | 0.425484  |
| 10               | 6                | 0              | 1.571102                | -0.265877 | -0.792164 |
| 11               | 6                | 0              | 2.872996                | -3.077099 | 1.428828  |
| 12               | 1                | 0              | 2.339419                | -2.762539 | -0.576916 |
| 13               | 8                | 0              | 1.429066                | -0.325733 | 1.583071  |
| 14               | 6                | 0              | -1.907369               | -3.224825 | 0.305424  |
| 15               | 6                | 0              | -2.349400               | -1.970842 | -0.512017 |
| 16               | 6                | 0              | -1.265129               | -0.873353 | -0.039913 |
| 17               | 6                | 0              | -0.063609               | -1.774912 | 0.315062  |
| 18               | 6                | 0              | -0.435045               | -3.035635 | 0.515311  |
| 19               | 1                | 0              | -2.424142               | -3.278310 | 1.272434  |
| 20               | 1                | 0              | -2.139340               | -4.157548 | -0.215560 |
| 21               | 6                | 0              | -2.172173               | -2.326592 | -2.002192 |
| 22               | 6                | 0              | -1.723559               | -0.131425 | 1.237975  |
| 23               | 1                | 0              | 0.226546                | -3.840252 | 0.809044  |
| 24               | 1                | 0              | -2.445593               | -1.510802 | -2.671815 |
| 25               | 1                | 0              | -1.138173               | -2.601541 | -2.218781 |
| 26               | 1                | 0              | -2.794230               | -3.184940 | -2.261569 |
| 27               | 1                | 0              | -0.925110               | 0.509745  | 1.607950  |
| 28               | 1                | 0              | -2.593327               | 0.499591  | 1.050429  |
| 29               | 1                | 0              | -1.984524               | -0.826151 | 2.038253  |
| 30               | 6                | 0              | -3.842605               | -1.616473 | -0.209645 |
| 31               | 6                | 0              | -4.357853               | -0.398645 | -1.005960 |
| 32               | 6                | 0              | -5.714572               | 0.144779  | -0.562462 |
| 33               | 6                | 0              | -6.131655               | 1.449318  | -1.266879 |
| 34               | 6                | 0              | -5.681079               | 2.547656  | -0.298517 |
| 35               | 6                | 0              | -5.671707               | 1.829243  | 1.048022  |
| 36               | 8                | 0              | -5.686301               | 0.484723  | 0.853977  |
| 37               | 1                | 0              | -6.483288               | -0.620509 | -0.660103 |
| 38               | 1                | 0              | -7.217969               | 1.482471  | -1.382814 |
| 39               | 1                | 0              | -5.688315               | 1.537121  | -2.259233 |
| 40               | 1                | 0              | -4.634538               | 2.810964  | -0.493528 |
| 41               | 6                | 0              | -6.513282               | 3.825517  | -0.284213 |
| 42               | 1                | 0              | -3.898046               | -1.354440 | 0.848574  |
| 43               | 1                | 0              | -4.455887               | -0.661232 | -2.064889 |
| 44               | 1                | 0              | -3.633809               | 0.417254  | -0.958744 |
| 45               | 8                | 0              | -5.643380               | 2.317247  | 2.142156  |
| 46               | 1                | 0              | -6.170923               | 4.494437  | 0.505974  |
| 47               | 1                | 0              | -6.435549               | 4.348468  | -1.239701 |
| 48               | 1                | 0              | -7.567406               | 3.602468  | -0.102936 |
| 49               | 1                | 0              | 1.405969                | -0.922116 | -1.655298 |
| 50               | 6                | 0              | 3.100505                | 0.059196  | -0.820500 |
| 51               | 6                | 0              | 3.573220                | 0.053184  | -2.282404 |

|    |   |   |           |           |           |
|----|---|---|-----------|-----------|-----------|
| 52 | 6 | 0 | 3.509356  | 1.381394  | -0.112880 |
| 53 | 1 | 0 | 4.623407  | 0.335483  | -2.382342 |
| 54 | 1 | 0 | 3.456228  | -0.935685 | -2.728148 |
| 55 | 1 | 0 | 2.986149  | 0.755405  | -2.879573 |
| 56 | 6 | 0 | 3.293075  | 2.697357  | -0.889306 |
| 57 | 6 | 0 | 3.755146  | 3.877401  | -0.067925 |
| 58 | 8 | 0 | 3.038964  | 4.608759  | 0.570304  |
| 59 | 8 | 0 | 5.100755  | 4.013414  | -0.109633 |
| 60 | 6 | 0 | 5.642443  | 5.088944  | 0.677046  |
| 61 | 6 | 0 | 4.988879  | -1.782370 | -0.499840 |
| 62 | 1 | 0 | 3.963812  | -0.725985 | 1.002142  |
| 63 | 6 | 0 | 5.033424  | -2.970698 | -1.102238 |
| 64 | 6 | 0 | 6.258502  | -1.001964 | -0.261983 |
| 65 | 1 | 0 | 5.974720  | -3.384161 | -1.445666 |
| 66 | 1 | 0 | 4.155857  | -3.580248 | -1.273947 |
| 67 | 1 | 0 | 6.405540  | -0.818636 | 0.807507  |
| 68 | 1 | 0 | 7.129887  | -1.538455 | -0.639003 |
| 69 | 1 | 0 | 6.232325  | -0.021655 | -0.745106 |
| 70 | 1 | 0 | 2.242529  | 2.863694  | -1.113051 |
| 71 | 1 | 0 | 3.855193  | 2.684343  | -1.824317 |
| 72 | 1 | 0 | 4.575619  | 1.318385  | 0.118206  |
| 73 | 1 | 0 | 2.985542  | 1.438030  | 0.842494  |
| 74 | 8 | 0 | 2.450703  | -4.203037 | 1.533318  |
| 75 | 1 | 0 | 3.579307  | -2.682294 | 2.188666  |
| 76 | 6 | 0 | 1.215380  | -0.905690 | 2.862489  |
| 77 | 1 | 0 | 0.395962  | -1.627630 | 2.854942  |
| 78 | 1 | 0 | 2.119014  | -1.397576 | 3.238079  |
| 79 | 1 | 0 | 0.964308  | -0.087559 | 3.537825  |
| 80 | 6 | 0 | -4.786092 | -2.817380 | -0.412908 |
| 81 | 1 | 0 | -5.784607 | -2.593503 | -0.033640 |
| 82 | 1 | 0 | -4.888349 | -3.085821 | -1.467676 |
| 83 | 1 | 0 | -4.439850 | -3.700381 | 0.123879  |
| 84 | 1 | 0 | 5.393363  | 4.954323  | 1.729391  |
| 85 | 1 | 0 | 6.718531  | 5.045630  | 0.528736  |
| 86 | 1 | 0 | 5.246140  | 6.045391  | 0.337009  |

---

| Center<br>Number | Atomic<br>Number | Atomic<br>Type | Coordinates (Angstroms) |           |           |
|------------------|------------------|----------------|-------------------------|-----------|-----------|
|                  |                  |                | X                       | Y         | Z         |
| 1                | 6                | 0              | -1.022014               | 0.150989  | -1.103712 |
| 2                | 6                | 0              | 0.358601                | 0.821602  | -0.971635 |
| 3                | 1                | 0              | -1.037918               | -0.361984 | -2.065837 |
| 4                | 1                | 0              | -1.789830               | 0.927732  | -1.152160 |
| 5                | 1                | 0              | 0.390690                | 1.487883  | -0.108827 |
| 6                | 1                | 0              | 0.531437                | 1.439386  | -1.858311 |
| 7                | 6                | 0              | 3.631019                | -1.117777 | -0.185604 |
| 8                | 6                | 0              | 2.479016                | -2.045207 | 0.283645  |
| 9                | 6                | 0              | 1.250094                | -1.092109 | 0.426262  |
| 10               | 6                | 0              | 1.431064                | -0.257240 | -0.856585 |
| 11               | 6                | 0              | 2.896052                | -2.882497 | 1.473773  |
| 12               | 1                | 0              | 2.198906                | -2.753290 | -0.495889 |
| 13               | 8                | 0              | 1.398228                | -0.176647 | 1.528788  |
| 14               | 6                | 0              | -1.952788               | -3.174317 | 0.568080  |
| 15               | 6                | 0              | -2.438854               | -1.985929 | -0.318843 |
| 16               | 6                | 0              | -1.355864               | -0.845235 | 0.040889  |
| 17               | 6                | 0              | -0.129041               | -1.708084 | 0.409204  |
| 18               | 6                | 0              | -0.476242               | -2.955661 | 0.709557  |
| 19               | 1                | 0              | -2.433325               | -3.163963 | 1.555017  |
| 20               | 1                | 0              | -2.192696               | -4.143863 | 0.123436  |
| 21               | 6                | 0              | -2.305857               | -2.440548 | -1.786430 |
| 22               | 6                | 0              | -1.778471               | -0.029163 | 1.285470  |
| 23               | 1                | 0              | 0.206886                | -3.729848 | 1.035086  |
| 24               | 1                | 0              | -2.611723               | -1.675590 | -2.500566 |
| 25               | 1                | 0              | -1.276108               | -2.719088 | -2.017895 |
| 26               | 1                | 0              | -2.925369               | -3.321015 | -1.965412 |
| 27               | 1                | 0              | -0.972877               | 0.638062  | 1.588044  |
| 28               | 1                | 0              | -2.660051               | 0.582912  | 1.089807  |
| 29               | 1                | 0              | -2.004749               | -0.674583 | 2.136268  |
| 30               | 6                | 0              | -3.925769               | -1.625896 | 0.005886  |
| 31               | 6                | 0              | -4.494779               | -0.501795 | -0.887587 |
| 32               | 6                | 0              | -5.777762               | 0.147680  | -0.374112 |
| 33               | 6                | 0              | -6.297114               | 1.302569  | -1.250880 |
| 34               | 6                | 0              | -5.720569               | 2.556151  | -0.585597 |
| 35               | 6                | 0              | -5.506312               | 2.107931  | 0.857418  |
| 36               | 8                | 0              | -5.547369               | 0.752317  | 0.931827  |
| 37               | 1                | 0              | -6.549363               | -0.603707 | -0.211245 |
| 38               | 1                | 0              | -7.389066               | 1.336281  | -1.218881 |
| 39               | 1                | 0              | -5.998085               | 1.188841  | -2.293188 |
| 40               | 1                | 0              | -4.717009               | 2.759356  | -0.978023 |
| 41               | 6                | 0              | -6.555397               | 3.828002  | -0.693739 |
| 42               | 1                | 0              | -3.947715               | -1.264253 | 1.035379  |
| 43               | 1                | 0              | -4.716661               | -0.900107 | -1.883582 |
| 44               | 1                | 0              | -3.752364               | 0.285742  | -1.032270 |
| 45               | 8                | 0              | -5.312672               | 2.795967  | 1.819506  |
| 46               | 1                | 0              | -6.108314               | 4.629022  | -0.104136 |
| 47               | 1                | 0              | -6.624771               | 4.158301  | -1.732304 |
| 48               | 1                | 0              | -7.569010               | 3.661659  | -0.321320 |
| 49               | 1                | 0              | 1.237971                | -0.968465 | -1.669017 |
| 50               | 6                | 0              | 2.946758                | 0.096294  | -0.973507 |
| 51               | 6                | 0              | 3.324274                | 0.152763  | -2.461632 |

|    |   |   |           |           |           |
|----|---|---|-----------|-----------|-----------|
| 52 | 6 | 0 | 3.232817  | 1.463630  | -0.299724 |
| 53 | 1 | 0 | 4.380964  | 0.369096  | -2.622991 |
| 54 | 1 | 0 | 3.109528  | -0.791994 | -2.962824 |
| 55 | 1 | 0 | 2.750258  | 0.937705  | -2.962121 |
| 56 | 6 | 0 | 4.697778  | 1.940055  | -0.286344 |
| 57 | 6 | 0 | 4.808874  | 3.262065  | 0.434989  |
| 58 | 8 | 0 | 5.048288  | 3.395339  | 1.609956  |
| 59 | 8 | 0 | 4.576022  | 4.303438  | -0.395264 |
| 60 | 6 | 0 | 4.610176  | 5.605585  | 0.215514  |
| 61 | 6 | 0 | 4.761573  | -1.862477 | -0.887280 |
| 62 | 1 | 0 | 4.066670  | -0.684805 | 0.721633  |
| 63 | 6 | 0 | 4.593523  | -3.006352 | -1.551074 |
| 64 | 6 | 0 | 6.141466  | -1.263079 | -0.773492 |
| 65 | 1 | 0 | 5.434139  | -3.499390 | -2.025337 |
| 66 | 1 | 0 | 3.636900  | -3.501480 | -1.652734 |
| 67 | 1 | 0 | 6.890838  | -1.912415 | -1.227188 |
| 68 | 1 | 0 | 6.204873  | -0.287628 | -1.261669 |
| 69 | 1 | 0 | 6.414835  | -1.108385 | 0.275363  |
| 70 | 1 | 0 | 5.081803  | 2.057933  | -1.300384 |
| 71 | 1 | 0 | 5.329250  | 1.237394  | 0.254546  |
| 72 | 1 | 0 | 2.871824  | 1.426495  | 0.727573  |
| 73 | 1 | 0 | 2.641613  | 2.223923  | -0.817384 |
| 74 | 8 | 0 | 2.482902  | -3.990247 | 1.716222  |
| 75 | 1 | 0 | 3.664877  | -2.424713 | 2.131291  |
| 76 | 6 | 0 | 1.247568  | -0.686154 | 2.846745  |
| 77 | 1 | 0 | 0.421946  | -1.397091 | 2.921001  |
| 78 | 1 | 0 | 2.164992  | -1.167972 | 3.200403  |
| 79 | 1 | 0 | 1.041831  | 0.170556  | 3.488534  |
| 80 | 6 | 0 | -4.855893 | -2.853004 | -0.047001 |
| 81 | 1 | 0 | -5.861466 | -2.592803 | 0.289239  |
| 82 | 1 | 0 | -4.945308 | -3.256437 | -1.058806 |
| 83 | 1 | 0 | -4.508510 | -3.655609 | 0.603431  |
| 84 | 1 | 0 | 4.399907  | 6.309136  | -0.586056 |
| 85 | 1 | 0 | 3.856281  | 5.677970  | 0.999040  |
| 86 | 1 | 0 | 5.592304  | 5.796999  | 0.647056  |

---

| Center<br>Number | Atomic<br>Number | Atomic<br>Type | Coordinates (Angstroms) |           |           |
|------------------|------------------|----------------|-------------------------|-----------|-----------|
|                  |                  |                | X                       | Y         | Z         |
| 1                | 6                | 0              | -0.924904               | 0.011898  | -1.177022 |
| 2                | 6                | 0              | 0.444039                | 0.721893  | -1.162556 |
| 3                | 1                | 0              | -0.970016               | -0.564301 | -2.101633 |
| 4                | 1                | 0              | -1.714114               | 0.765479  | -1.241738 |
| 5                | 1                | 0              | 0.494107                | 1.469096  | -0.369765 |
| 6                | 1                | 0              | 0.565805                | 1.254998  | -2.109671 |
| 7                | 6                | 0              | 3.788213                | -0.929570 | -0.207318 |
| 8                | 6                | 0              | 2.718066                | -1.922392 | 0.302496  |
| 9                | 6                | 0              | 1.433069                | -1.031673 | 0.371393  |
| 10               | 6                | 0              | 1.537911                | -0.327396 | -0.995316 |
| 11               | 6                | 0              | 3.168918                | -2.641329 | 1.555623  |
| 12               | 1                | 0              | 2.502589                | -2.698416 | -0.435057 |
| 13               | 8                | 0              | 1.556329                | -0.003666 | 1.374629  |
| 14               | 6                | 0              | -1.677980               | -3.216027 | 0.764088  |
| 15               | 6                | 0              | -2.228042               | -2.122101 | -0.203024 |
| 16               | 6                | 0              | -1.186512               | -0.914648 | 0.045137  |
| 17               | 6                | 0              | 0.082669                | -1.700195 | 0.448249  |
| 18               | 6                | 0              | -0.208436               | -2.932327 | 0.853279  |
| 19               | 1                | 0              | -2.139151               | -3.144334 | 1.757852  |
| 20               | 1                | 0              | -1.888185               | -4.226282 | 0.403226  |
| 21               | 6                | 0              | -2.100721               | -2.684565 | -1.633066 |
| 22               | 6                | 0              | -1.617330               | -0.028281 | 1.237776  |
| 23               | 1                | 0              | 0.511343                | -3.652709 | 1.220516  |
| 24               | 1                | 0              | -2.458935               | -1.994680 | -2.397476 |
| 25               | 1                | 0              | -1.062764               | -2.928974 | -1.866022 |
| 26               | 1                | 0              | -2.678139               | -3.605727 | -1.728750 |
| 27               | 1                | 0              | -0.846563               | 0.709710  | 1.455751  |
| 28               | 1                | 0              | -2.541198               | 0.511711  | 1.028380  |
| 29               | 1                | 0              | -1.775326               | -0.615862 | 2.144017  |
| 30               | 6                | 0              | -3.723059               | -1.798886 | 0.124386  |
| 31               | 6                | 0              | -4.351939               | -0.760005 | -0.829675 |
| 32               | 6                | 0              | -5.662175               | -0.144530 | -0.343736 |
| 33               | 6                | 0              | -6.234741               | 0.941659  | -1.273436 |
| 34               | 6                | 0              | -5.715223               | 2.251455  | -0.671871 |
| 35               | 6                | 0              | -5.475838               | 1.883550  | 0.789836  |
| 36               | 8                | 0              | -5.456824               | 0.532853  | 0.930263  |
| 37               | 1                | 0              | -6.399045               | -0.920816 | -0.141671 |
| 38               | 1                | 0              | -7.327007               | 0.927119  | -1.238768 |
| 39               | 1                | 0              | -5.932577               | 0.791175  | -2.310194 |
| 40               | 1                | 0              | -4.723840               | 2.482752  | -1.079270 |
| 41               | 6                | 0              | -6.609945               | 3.475759  | -0.836169 |
| 42               | 1                | 0              | -3.742405               | -1.370338 | 1.128063  |
| 43               | 1                | 0              | -4.559784               | -1.226890 | -1.798531 |
| 44               | 1                | 0              | -3.649911               | 0.052680  | -1.026437 |
| 45               | 8                | 0              | -5.309537               | 2.625152  | 1.716690  |
| 46               | 1                | 0              | -6.198533               | 4.325111  | -0.289896 |
| 47               | 1                | 0              | -6.699647               | 3.750554  | -1.889201 |
| 48               | 1                | 0              | -7.612761               | 3.280250  | -0.448950 |
| 49               | 1                | 0              | 1.288195                | -1.121669 | -1.707805 |
| 50               | 6                | 0              | 3.049289                | -0.008700 | -1.270925 |
| 51               | 6                | 0              | 3.352415                | -0.452446 | -2.715860 |

|    |   |   |           |           |           |
|----|---|---|-----------|-----------|-----------|
| 52 | 6 | 0 | 3.428785  | 1.492106  | -1.192521 |
| 53 | 1 | 0 | 4.389668  | -0.262236 | -2.997079 |
| 54 | 1 | 0 | 3.163178  | -1.517992 | -2.857444 |
| 55 | 1 | 0 | 2.715895  | 0.097400  | -3.415148 |
| 56 | 6 | 0 | 3.417097  | 2.195462  | 0.164621  |
| 57 | 6 | 0 | 3.562668  | 3.694875  | 0.036107  |
| 58 | 8 | 0 | 3.428853  | 4.339873  | -0.974778 |
| 59 | 8 | 0 | 3.848057  | 4.254595  | 1.233720  |
| 60 | 6 | 0 | 3.958258  | 5.688531  | 1.241336  |
| 61 | 6 | 0 | 5.102728  | -1.552869 | -0.636277 |
| 62 | 1 | 0 | 4.021650  | -0.289086 | 0.648951  |
| 63 | 6 | 0 | 5.245531  | -2.842790 | -0.940838 |
| 64 | 6 | 0 | 6.292197  | -0.625210 | -0.660338 |
| 65 | 1 | 0 | 6.211627  | -3.242169 | -1.227323 |
| 66 | 1 | 0 | 4.426483  | -3.549893 | -0.916854 |
| 67 | 1 | 0 | 7.201267  | -1.151085 | -0.953777 |
| 68 | 1 | 0 | 6.144282  | 0.206357  | -1.354390 |
| 69 | 1 | 0 | 6.458099  | -0.181700 | 0.327092  |
| 70 | 1 | 0 | 4.214200  | 1.844232  | 0.823401  |
| 71 | 1 | 0 | 2.490528  | 2.005323  | 0.710087  |
| 72 | 1 | 0 | 2.764959  | 2.040497  | -1.864113 |
| 73 | 1 | 0 | 4.424548  | 1.616191  | -1.627443 |
| 74 | 8 | 0 | 2.805598  | -3.744335 | 1.885701  |
| 75 | 1 | 0 | 3.909830  | -2.096942 | 2.177119  |
| 76 | 6 | 0 | 1.456846  | -0.386522 | 2.739578  |
| 77 | 1 | 0 | 1.210518  | 0.515941  | 3.299547  |
| 78 | 1 | 0 | 0.674944  | -1.131361 | 2.900786  |
| 79 | 1 | 0 | 2.405898  | -0.779160 | 3.118939  |
| 80 | 6 | 0 | -4.603656 | -3.062189 | 0.172764  |
| 81 | 1 | 0 | -5.609470 | -2.820214 | 0.521371  |
| 82 | 1 | 0 | -4.703769 | -3.530566 | -0.809675 |
| 83 | 1 | 0 | -4.208147 | -3.809251 | 0.860893  |
| 84 | 1 | 0 | 4.758285  | 6.012941  | 0.576287  |
| 85 | 1 | 0 | 3.021611  | 6.144536  | 0.921283  |
| 86 | 1 | 0 | 4.182799  | 5.957599  | 2.270377  |

---

| Center<br>Number | Atomic<br>Number | Atomic<br>Type | Coordinates (Angstroms) |           |           |
|------------------|------------------|----------------|-------------------------|-----------|-----------|
|                  |                  |                | X                       | Y         | Z         |
| 1                | 6                | 0              | -0.951481               | 0.175144  | -1.184440 |
| 2                | 6                | 0              | 0.445583                | 0.816551  | -1.085257 |
| 3                | 1                | 0              | -0.973405               | -0.402677 | -2.109245 |
| 4                | 1                | 0              | -1.697001               | 0.967074  | -1.293917 |
| 5                | 1                | 0              | 0.491304                | 1.540850  | -0.271422 |
| 6                | 1                | 0              | 0.642228                | 1.367105  | -2.010242 |
| 7                | 6                | 0              | 3.657974                | -1.145273 | -0.135714 |
| 8                | 6                | 0              | 2.479158                | -2.014354 | 0.376179  |
| 9                | 6                | 0              | 1.275095                | -1.022325 | 0.446744  |
| 10               | 6                | 0              | 1.487342                | -0.279715 | -0.887614 |
| 11               | 6                | 0              | 2.864207                | -2.784861 | 1.620317  |
| 12               | 1                | 0              | 2.188325                | -2.762488 | -0.360870 |
| 13               | 8                | 0              | 1.445000                | -0.042454 | 1.489647  |
| 14               | 6                | 0              | -1.987042               | -2.997976 | 0.708497  |
| 15               | 6                | 0              | -2.432889               | -1.862328 | -0.264190 |
| 16               | 6                | 0              | -1.320729               | -0.729838 | 0.023752  |
| 17               | 6                | 0              | -0.120671               | -1.599470 | 0.460441  |
| 18               | 6                | 0              | -0.505182               | -2.812785 | 0.844595  |
| 19               | 1                | 0              | -2.472021               | -2.901565 | 1.688804  |
| 20               | 1                | 0              | -2.254086               | -3.989383 | 0.332941  |
| 21               | 6                | 0              | -2.303755               | -2.421067 | -1.695594 |
| 22               | 6                | 0              | -1.726442               | 0.182644  | 1.205709  |
| 23               | 1                | 0              | 0.152490                | -3.582262 | 1.228286  |
| 24               | 1                | 0              | -2.592977               | -1.702328 | -2.462852 |
| 25               | 1                | 0              | -1.278313               | -2.732870 | -1.902036 |
| 26               | 1                | 0              | -2.938322               | -3.300836 | -1.816580 |
| 27               | 1                | 0              | -0.905384               | 0.850489  | 1.463028  |
| 28               | 1                | 0              | -2.592913               | 0.799499  | 0.964180  |
| 29               | 1                | 0              | -1.968705               | -0.396554 | 2.098917  |
| 30               | 6                | 0              | -3.909820               | -1.438364 | 0.024069  |
| 31               | 6                | 0              | -4.437626               | -0.355275 | -0.941993 |
| 32               | 6                | 0              | -5.683928               | 0.378709  | -0.474224 |
| 33               | 6                | 0              | -6.225500               | 1.426368  | -1.458231 |
| 34               | 6                | 0              | -6.819054               | 2.506633  | -0.545703 |
| 35               | 6                | 0              | -6.026894               | 2.328351  | 0.747666  |
| 36               | 8                | 0              | -5.380020               | 1.132916  | 0.734692  |
| 37               | 1                | 0              | -6.471272               | -0.329531 | -0.202847 |
| 38               | 1                | 0              | -6.951887               | 0.995489  | -2.148866 |
| 39               | 1                | 0              | -5.401488               | 1.834197  | -2.049222 |
| 40               | 1                | 0              | -6.626405               | 3.514014  | -0.917120 |
| 41               | 6                | 0              | -8.322603               | 2.358079  | -0.270461 |
| 42               | 1                | 0              | -3.924888               | -1.011223 | 1.028642  |
| 43               | 1                | 0              | -4.675647               | -0.806462 | -1.911876 |
| 44               | 1                | 0              | -3.673150               | 0.399262  | -1.133488 |
| 45               | 8                | 0              | -5.958338               | 3.083186  | 1.675892  |
| 46               | 1                | 0              | -8.648676               | 3.084356  | 0.475167  |
| 47               | 1                | 0              | -8.892199               | 2.524463  | -1.187029 |
| 48               | 1                | 0              | -8.565897               | 1.359648  | 0.101782  |
| 49               | 1                | 0              | 1.280780                | -1.039782 | -1.651187 |
| 50               | 6                | 0              | 3.011964                | 0.027892  | -1.014161 |
| 51               | 6                | 0              | 3.405496                | -0.035677 | -2.497974 |

|    |   |   |           |           |           |
|----|---|---|-----------|-----------|-----------|
| 52 | 6 | 0 | 3.325062  | 1.435492  | -0.443933 |
| 53 | 1 | 0 | 4.469551  | 0.141579  | -2.659358 |
| 54 | 1 | 0 | 3.173162  | -1.009289 | -2.931605 |
| 55 | 1 | 0 | 2.857710  | 0.724525  | -3.062008 |
| 56 | 6 | 0 | 4.788452  | 1.875738  | -0.440135 |
| 57 | 6 | 0 | 4.959209  | 3.305208  | 0.029162  |
| 58 | 8 | 0 | 4.088994  | 4.135551  | 0.107058  |
| 59 | 8 | 0 | 6.251202  | 3.557883  | 0.339951  |
| 60 | 6 | 0 | 6.539535  | 4.904354  | 0.756411  |
| 61 | 6 | 0 | 4.783055  | -1.960035 | -0.763601 |
| 62 | 1 | 0 | 4.087011  | -0.661366 | 0.748873  |
| 63 | 6 | 0 | 4.602765  | -3.146176 | -1.345051 |
| 64 | 6 | 0 | 6.172552  | -1.379246 | -0.672146 |
| 65 | 1 | 0 | 5.440460  | -3.687508 | -1.769243 |
| 66 | 1 | 0 | 3.638381  | -3.629829 | -1.426029 |
| 67 | 1 | 0 | 6.915674  | -2.072478 | -1.067421 |
| 68 | 1 | 0 | 6.261663  | -0.442182 | -1.226575 |
| 69 | 1 | 0 | 6.434656  | -1.155475 | 0.367206  |
| 70 | 1 | 0 | 5.231880  | 1.832658  | -1.440568 |
| 71 | 1 | 0 | 5.413708  | 1.244319  | 0.192688  |
| 72 | 1 | 0 | 2.941579  | 1.495845  | 0.573928  |
| 73 | 1 | 0 | 2.761515  | 2.171181  | -1.021336 |
| 74 | 8 | 0 | 2.429016  | -3.868765 | 1.924450  |
| 75 | 1 | 0 | 3.632196  | -2.300729 | 2.260277  |
| 76 | 6 | 0 | 1.253276  | -0.455633 | 2.834712  |
| 77 | 1 | 0 | 1.098620  | 0.452625  | 3.417451  |
| 78 | 1 | 0 | 0.382806  | -1.105359 | 2.946629  |
| 79 | 1 | 0 | 2.134077  | -0.972986 | 3.229644  |
| 80 | 6 | 0 | -4.876071 | -2.637957 | 0.042983  |
| 81 | 1 | 0 | -5.876994 | -2.325360 | 0.347335  |
| 82 | 1 | 0 | -4.967964 | -3.106334 | -0.940188 |
| 83 | 1 | 0 | -4.560079 | -3.404724 | 0.750348  |
| 84 | 1 | 0 | 6.281692  | 5.610845  | -0.032275 |
| 85 | 1 | 0 | 5.977029  | 5.153298  | 1.655906  |
| 86 | 1 | 0 | 7.608114  | 4.924856  | 0.954972  |

---



| Center<br>Number | Atomic<br>Number | Atomic<br>Type | Coordinates (Angstroms) |           |           |
|------------------|------------------|----------------|-------------------------|-----------|-----------|
|                  |                  |                | X                       | Y         | Z         |
| 1                | 6                | 0              | -1.117822               | 0.120145  | -1.142479 |
| 2                | 6                | 0              | 0.275109                | 0.772340  | -1.063070 |
| 3                | 1                | 0              | -1.148310               | -0.455742 | -2.068086 |
| 4                | 1                | 0              | -1.873343               | 0.904232  | -1.239858 |
| 5                | 1                | 0              | 0.328258                | 1.498187  | -0.251047 |
| 6                | 1                | 0              | 0.454907                | 1.321778  | -1.991864 |
| 7                | 6                | 0              | 3.520990                | -1.198287 | -0.224893 |
| 8                | 6                | 0              | 2.367040                | -2.015846 | 0.406815  |
| 9                | 6                | 0              | 1.143122                | -1.049628 | 0.467056  |
| 10               | 6                | 0              | 1.326598                | -0.315925 | -0.877215 |
| 11               | 6                | 0              | 2.779063                | -2.729943 | 1.673470  |
| 12               | 1                | 0              | 2.054592                | -2.821956 | -0.266220 |
| 13               | 8                | 0              | 1.292093                | -0.053108 | 1.496670  |
| 14               | 6                | 0              | -2.104828               | -3.063048 | 0.761180  |
| 15               | 6                | 0              | -2.566265               | -1.934732 | -0.212859 |
| 16               | 6                | 0              | -1.463532               | -0.791370 | 0.067549  |
| 17               | 6                | 0              | -0.247516               | -1.645361 | 0.495122  |
| 18               | 6                | 0              | -0.624393               | -2.859206 | 0.884301  |
| 19               | 1                | 0              | -2.585606               | -2.967927 | 1.743460  |
| 20               | 1                | 0              | -2.362789               | -4.058116 | 0.389315  |
| 21               | 6                | 0              | -2.437419               | -2.497675 | -1.642611 |
| 22               | 6                | 0              | -1.866335               | 0.111565  | 1.257719  |
| 23               | 1                | 0              | 0.032873                | -3.630290 | 1.266947  |
| 24               | 1                | 0              | -2.736173               | -1.784328 | -2.410840 |
| 25               | 1                | 0              | -1.410303               | -2.800918 | -1.853664 |
| 26               | 1                | 0              | -3.065843               | -3.382667 | -1.757367 |
| 27               | 1                | 0              | -1.051505               | 0.789234  | 1.507361  |
| 28               | 1                | 0              | -2.742465               | 0.718409  | 1.026411  |
| 29               | 1                | 0              | -2.094020               | -0.471888 | 2.151679  |
| 30               | 6                | 0              | -4.046729               | -1.526746 | 0.082744  |
| 31               | 6                | 0              | -4.586275               | -0.438467 | -0.869589 |
| 32               | 6                | 0              | -5.904482               | 0.204151  | -0.441969 |
| 33               | 6                | 0              | -6.350811               | 1.378819  | -1.332730 |
| 34               | 6                | 0              | -5.829872               | 2.616481  | -0.595281 |
| 35               | 6                | 0              | -5.735854               | 2.136855  | 0.850281  |
| 36               | 8                | 0              | -5.777389               | 0.779047  | 0.890222  |
| 37               | 1                | 0              | -6.687651               | -0.548263 | -0.358657 |
| 38               | 1                | 0              | -7.441746               | 1.413970  | -1.388502 |
| 39               | 1                | 0              | -5.968285               | 1.287603  | -2.349706 |
| 40               | 1                | 0              | -4.797098               | 2.825093  | -0.898930 |
| 41               | 6                | 0              | -6.651471               | 3.892668  | -0.744805 |
| 42               | 1                | 0              | -4.064448               | -1.109921 | 1.091267  |
| 43               | 1                | 0              | -4.751790               | -0.864477 | -1.865075 |
| 44               | 1                | 0              | -3.847904               | 0.355582  | -0.996985 |
| 45               | 8                | 0              | -5.627359               | 2.802295  | 1.840850  |
| 46               | 1                | 0              | -6.251849               | 4.680391  | -0.105395 |
| 47               | 1                | 0              | -6.636332               | 4.243621  | -1.778757 |
| 48               | 1                | 0              | -7.691999               | 3.722345  | -0.458372 |
| 49               | 1                | 0              | 1.111290                | -1.084970 | -1.630628 |
| 50               | 6                | 0              | 2.844286                | -0.002946 | -1.041531 |
| 51               | 6                | 0              | 3.186064                | 0.004931  | -2.540202 |

|    |   |   |           |           |           |
|----|---|---|-----------|-----------|-----------|
| 52 | 6 | 0 | 3.195966  | 1.377589  | -0.428047 |
| 53 | 1 | 0 | 4.252529  | 0.139737  | -2.725314 |
| 54 | 1 | 0 | 2.895626  | -0.926539 | -3.026465 |
| 55 | 1 | 0 | 2.659704  | 0.824777  | -3.037236 |
| 56 | 6 | 0 | 4.667936  | 1.786346  | -0.482957 |
| 57 | 6 | 0 | 4.901588  | 3.185321  | 0.045231  |
| 58 | 8 | 0 | 4.053776  | 4.015843  | 0.257324  |
| 59 | 8 | 0 | 6.221005  | 3.411334  | 0.239247  |
| 60 | 6 | 0 | 6.565389  | 4.726775  | 0.707412  |
| 61 | 6 | 0 | 4.529092  | -2.066257 | -0.970473 |
| 62 | 1 | 0 | 4.063183  | -0.751962 | 0.609922  |
| 63 | 6 | 0 | 4.189534  | -3.099896 | -1.739433 |
| 64 | 6 | 0 | 5.978004  | -1.700170 | -0.783398 |
| 65 | 1 | 0 | 4.943201  | -3.686861 | -2.251322 |
| 66 | 1 | 0 | 3.162319  | -3.406335 | -1.899528 |
| 67 | 1 | 0 | 6.637183  | -2.388894 | -1.313165 |
| 68 | 1 | 0 | 6.186198  | -0.689144 | -1.145807 |
| 69 | 1 | 0 | 6.238399  | -1.718048 | 0.279193  |
| 70 | 1 | 0 | 5.058301  | 1.778707  | -1.505819 |
| 71 | 1 | 0 | 5.308361  | 1.109653  | 0.086174  |
| 72 | 1 | 0 | 2.865834  | 1.401394  | 0.609198  |
| 73 | 1 | 0 | 2.616785  | 2.144788  | -0.946742 |
| 74 | 8 | 0 | 3.880024  | -2.678050 | 2.165546  |
| 75 | 1 | 0 | 2.001492  | -3.368243 | 2.139264  |
| 76 | 6 | 0 | 1.145004  | -0.453386 | 2.852775  |
| 77 | 1 | 0 | 0.292878  | -1.123247 | 2.993238  |
| 78 | 1 | 0 | 2.050068  | -0.932761 | 3.234832  |
| 79 | 1 | 0 | 0.972796  | 0.459219  | 3.423685  |
| 80 | 6 | 0 | -5.002345 | -2.735311 | 0.094303  |
| 81 | 1 | 0 | -5.990733 | -2.443336 | 0.453434  |
| 82 | 1 | 0 | -5.130978 | -3.167875 | -0.901285 |
| 83 | 1 | 0 | -4.651733 | -3.525409 | 0.758298  |
| 84 | 1 | 0 | 7.648306  | 4.727438  | 0.802592  |
| 85 | 1 | 0 | 6.242214  | 5.483062  | -0.007732 |
| 86 | 1 | 0 | 6.095411  | 4.923282  | 1.670749  |

---

| Center<br>Number | Atomic<br>Number | Atomic<br>Type | Coordinates (Angstroms) |           |           |
|------------------|------------------|----------------|-------------------------|-----------|-----------|
|                  |                  |                | X                       | Y         | Z         |
| 1                | 6                | 0              | -0.722658               | 0.217967  | -1.064121 |
| 2                | 6                | 0              | 0.656621                | 0.856727  | -0.809883 |
| 3                | 1                | 0              | -0.697107               | -0.198814 | -2.071722 |
| 4                | 1                | 0              | -1.480052               | 1.006198  | -1.072503 |
| 5                | 1                | 0              | 0.655229                | 1.447287  | 0.107835  |
| 6                | 1                | 0              | 0.865755                | 1.541975  | -1.635521 |
| 7                | 6                | 0              | 3.858233                | -1.142589 | 0.056700  |
| 8                | 6                | 0              | 2.698108                | -2.135411 | 0.283095  |
| 9                | 6                | 0              | 1.460497                | -1.191039 | 0.439462  |
| 10               | 6                | 0              | 1.720393                | -0.235922 | -0.742691 |
| 11               | 6                | 0              | 3.015852                | -3.113645 | 1.393733  |
| 12               | 1                | 0              | 2.495796                | -2.737331 | -0.604812 |
| 13               | 8                | 0              | 1.552889                | -0.378997 | 1.627426  |
| 14               | 6                | 0              | -1.754786               | -3.244865 | 0.216091  |
| 15               | 6                | 0              | -2.193735               | -1.965904 | -0.562494 |
| 16               | 6                | 0              | -1.119679               | -0.880875 | -0.040745 |
| 17               | 6                | 0              | 0.082569                | -1.789467 | 0.293161  |
| 18               | 6                | 0              | -0.284679               | -3.058319 | 0.444061  |
| 19               | 1                | 0              | -2.277410               | -3.329954 | 1.177692  |
| 20               | 1                | 0              | -1.981952               | -4.160584 | -0.336353 |
| 21               | 6                | 0              | -1.999910               | -2.266764 | -2.062468 |
| 22               | 6                | 0              | -1.597161               | -0.186235 | 1.256978  |
| 23               | 1                | 0              | 0.377927                | -3.869883 | 0.715492  |
| 24               | 1                | 0              | -2.277806               | -1.430667 | -2.704702 |
| 25               | 1                | 0              | -0.960587               | -2.520816 | -2.278848 |
| 26               | 1                | 0              | -2.607851               | -3.123279 | -2.359409 |
| 27               | 1                | 0              | -0.808117               | 0.451041  | 1.653566  |
| 28               | 1                | 0              | -2.475076               | 0.437568  | 1.084452  |
| 29               | 1                | 0              | -1.852351               | -0.910802 | 2.032813  |
| 30               | 6                | 0              | -3.690136               | -1.625025 | -0.264307 |
| 31               | 6                | 0              | -4.211340               | -0.402633 | -1.052355 |
| 32               | 6                | 0              | -5.487773               | 0.219770  | -0.510359 |
| 33               | 6                | 0              | -6.024722               | 1.409006  | -1.320720 |
| 34               | 6                | 0              | -6.668842               | 2.308796  | -0.258887 |
| 35               | 6                | 0              | -5.909391               | 1.929354  | 1.010278  |
| 36               | 8                | 0              | -5.237114               | 0.763947  | 0.817900  |
| 37               | 1                | 0              | -6.265769               | -0.538510 | -0.388107 |
| 38               | 1                | 0              | -6.721272               | 1.088705  | -2.096866 |
| 39               | 1                | 0              | -5.193673               | 1.925376  | -1.808168 |
| 40               | 1                | 0              | -6.489793               | 3.367821  | -0.449427 |
| 41               | 6                | 0              | -8.175819               | 2.088176  | -0.061235 |
| 42               | 1                | 0              | -3.750907               | -1.374239 | 0.796452  |
| 43               | 1                | 0              | -4.408899               | -0.687983 | -2.091736 |
| 44               | 1                | 0              | -3.458185               | 0.386162  | -1.086932 |
| 45               | 8                | 0              | -5.882167               | 2.519378  | 2.053060  |
| 46               | 1                | 0              | -8.540104               | 2.670824  | 0.785847  |
| 47               | 1                | 0              | -8.722451               | 2.397967  | -0.954233 |
| 48               | 1                | 0              | -8.406518               | 1.036705  | 0.127879  |
| 49               | 1                | 0              | 1.562693                | -0.862152 | -1.629260 |
| 50               | 6                | 0              | 3.248314                | 0.096089  | -0.749524 |
| 51               | 6                | 0              | 3.726979                | 0.139370  | -2.209630 |

|    |   |   |           |           |           |
|----|---|---|-----------|-----------|-----------|
| 52 | 6 | 0 | 3.655768  | 1.391215  | 0.004336  |
| 53 | 1 | 0 | 4.772241  | 0.443988  | -2.296284 |
| 54 | 1 | 0 | 3.631035  | -0.838382 | -2.684245 |
| 55 | 1 | 0 | 3.128974  | 0.845751  | -2.791058 |
| 56 | 6 | 0 | 3.401909  | 2.731824  | -0.690954 |
| 57 | 6 | 0 | 4.051977  | 3.887450  | 0.039860  |
| 58 | 8 | 0 | 4.951667  | 3.805492  | 0.838772  |
| 59 | 8 | 0 | 3.507655  | 5.065105  | -0.339891 |
| 60 | 6 | 0 | 4.085953  | 6.240195  | 0.255540  |
| 61 | 6 | 0 | 5.139435  | -1.752585 | -0.481716 |
| 62 | 1 | 0 | 4.105854  | -0.747400 | 1.048096  |
| 63 | 6 | 0 | 5.190431  | -2.924541 | -1.115365 |
| 64 | 6 | 0 | 6.405150  | -0.974222 | -0.218349 |
| 65 | 1 | 0 | 6.134548  | -3.325175 | -1.466237 |
| 66 | 1 | 0 | 4.315961  | -3.532991 | -1.305679 |
| 67 | 1 | 0 | 6.545319  | -0.814027 | 0.855519  |
| 68 | 1 | 0 | 7.280107  | -1.499451 | -0.602951 |
| 69 | 1 | 0 | 6.378799  | 0.017317  | -0.677608 |
| 70 | 1 | 0 | 2.343325  | 2.960827  | -0.804076 |
| 71 | 1 | 0 | 3.822715  | 2.741922  | -1.701724 |
| 72 | 1 | 0 | 4.726817  | 1.338746  | 0.208956  |
| 73 | 1 | 0 | 3.166015  | 1.394142  | 0.979048  |
| 74 | 8 | 0 | 2.591090  | -4.241598 | 1.463177  |
| 75 | 1 | 0 | 3.720746  | -2.743233 | 2.166819  |
| 76 | 6 | 0 | 1.336510  | -1.007384 | 2.882934  |
| 77 | 1 | 0 | 0.523601  | -1.735774 | 2.843483  |
| 78 | 1 | 0 | 2.242248  | -1.504268 | 3.246471  |
| 79 | 1 | 0 | 1.073703  | -0.217040 | 3.586408  |
| 80 | 6 | 0 | -4.625853 | -2.827866 | -0.487510 |
| 81 | 1 | 0 | -5.644468 | -2.590731 | -0.173442 |
| 82 | 1 | 0 | -4.671059 | -3.121978 | -1.539074 |
| 83 | 1 | 0 | -4.315145 | -3.698003 | 0.090658  |
| 84 | 1 | 0 | 5.144199  | 6.312996  | 0.005452  |
| 85 | 1 | 0 | 3.534885  | 7.078895  | -0.162268 |
| 86 | 1 | 0 | 3.976612  | 6.210751  | 1.339278  |

---

| Center<br>Number | Atomic<br>Number | Atomic<br>Type | Coordinates (Angstroms) |           |           |
|------------------|------------------|----------------|-------------------------|-----------|-----------|
|                  |                  |                | X                       | Y         | Z         |
| 1                | 6                | 0              | -0.801397               | 0.042415  | -1.213650 |
| 2                | 6                | 0              | 0.576376                | 0.734841  | -1.203748 |
| 3                | 1                | 0              | -0.842864               | -0.561712 | -2.120602 |
| 4                | 1                | 0              | -1.579310               | 0.804119  | -1.310592 |
| 5                | 1                | 0              | 0.627198                | 1.503872  | -0.432325 |
| 6                | 1                | 0              | 0.716063                | 1.238740  | -2.164322 |
| 7                | 6                | 0              | 3.887611                | -0.930966 | -0.163503 |
| 8                | 6                | 0              | 2.798988                | -1.896112 | 0.360305  |
| 9                | 6                | 0              | 1.525571                | -0.986317 | 0.391866  |
| 10               | 6                | 0              | 1.654456                | -0.322615 | -0.993087 |
| 11               | 6                | 0              | 3.227434                | -2.588604 | 1.635891  |
| 12               | 1                | 0              | 2.581240                | -2.687803 | -0.359658 |
| 13               | 8                | 0              | 1.654616                | 0.067621  | 1.367231  |
| 14               | 6                | 0              | -1.621256               | -3.111691 | 0.821315  |
| 15               | 6                | 0              | -2.144442               | -2.042311 | -0.186733 |
| 16               | 6                | 0              | -1.088771               | -0.841650 | 0.034069  |
| 17               | 6                | 0              | 0.164621                | -1.632499 | 0.474931  |
| 18               | 6                | 0              | -0.148355               | -2.846875 | 0.915861  |
| 19               | 1                | 0              | -2.090361               | -2.999944 | 1.807645  |
| 20               | 1                | 0              | -1.844414               | -4.129886 | 0.491666  |
| 21               | 6                | 0              | -2.008793               | -2.651751 | -1.596809 |
| 22               | 6                | 0              | -1.521384               | 0.088747  | 1.192153  |
| 23               | 1                | 0              | 0.557060                | -3.565468 | 1.313060  |
| 24               | 1                | 0              | -2.349538               | -1.981602 | -2.386358 |
| 25               | 1                | 0              | -0.971154               | -2.914995 | -1.809659 |
| 26               | 1                | 0              | -2.595718               | -3.569020 | -1.670758 |
| 27               | 1                | 0              | -0.741954               | 0.821703  | 1.397054  |
| 28               | 1                | 0              | -2.434807               | 0.634265  | 0.952996  |
| 29               | 1                | 0              | -1.697242               | -0.468896 | 2.114180  |
| 30               | 6                | 0              | -3.637584               | -1.685835 | 0.110710  |
| 31               | 6                | 0              | -4.241293               | -0.685172 | -0.899057 |
| 32               | 6                | 0              | -5.505165               | 0.021045  | -0.436478 |
| 33               | 6                | 0              | -6.131024               | 0.967918  | -1.471339 |
| 34               | 6                | 0              | -6.741099               | 2.085840  | -0.617057 |
| 35               | 6                | 0              | -5.895536               | 2.039318  | 0.653559  |
| 36               | 8                | 0              | -5.196027               | 0.875031  | 0.703254  |
| 37               | 1                | 0              | -6.246413               | -0.701420 | -0.084593 |
| 38               | 1                | 0              | -6.861017               | 0.455170  | -2.099374 |
| 39               | 1                | 0              | -5.349343               | 1.366611  | -2.122994 |
| 40               | 1                | 0              | -6.609088               | 3.070335  | -1.067911 |
| 41               | 6                | 0              | -8.225473               | 1.892452  | -0.273713 |
| 42               | 1                | 0              | -3.659944               | -1.209406 | 1.092791  |
| 43               | 1                | 0              | -4.485416               | -1.203789 | -1.832971 |
| 44               | 1                | 0              | -3.517416               | 0.089138  | -1.157522 |
| 45               | 8                | 0              | -5.826830               | 2.864278  | 1.520157  |
| 46               | 1                | 0              | -8.557793               | 2.655228  | 0.431621  |
| 47               | 1                | 0              | -8.834276               | 1.968532  | -1.176916 |
| 48               | 1                | 0              | -8.409528               | 0.913364  | 0.175838  |
| 49               | 1                | 0              | 1.403024                | -1.133938 | -1.685438 |
| 50               | 6                | 0              | 3.172558                | -0.029686 | -1.259542 |
| 51               | 6                | 0              | 3.486066                | -0.514145 | -2.689141 |

|    |   |   |           |           |           |
|----|---|---|-----------|-----------|-----------|
| 52 | 6 | 0 | 3.570245  | 1.467919  | -1.216404 |
| 53 | 1 | 0 | 4.528424  | -0.342955 | -2.963836 |
| 54 | 1 | 0 | 3.285641  | -1.580632 | -2.806247 |
| 55 | 1 | 0 | 2.863690  | 0.025093  | -3.409105 |
| 56 | 6 | 0 | 3.551988  | 2.207709  | 0.121099  |
| 57 | 6 | 0 | 3.729228  | 3.699899  | -0.045137 |
| 58 | 8 | 0 | 3.637020  | 4.318306  | -1.077014 |
| 59 | 8 | 0 | 3.991830  | 4.287988  | 1.144222  |
| 60 | 6 | 0 | 4.131192  | 5.719035  | 1.114865  |
| 61 | 6 | 0 | 5.198671  | -1.581532 | -0.560837 |
| 62 | 1 | 0 | 4.119238  | -0.271135 | 0.678388  |
| 63 | 6 | 0 | 5.328866  | -2.880383 | -0.831141 |
| 64 | 6 | 0 | 6.399604  | -0.669052 | -0.595683 |
| 65 | 1 | 0 | 6.293080  | -3.298504 | -1.096470 |
| 66 | 1 | 0 | 4.501059  | -3.576818 | -0.798758 |
| 67 | 1 | 0 | 7.304974  | -1.212709 | -0.867399 |
| 68 | 1 | 0 | 6.268239  | 0.147153  | -1.311027 |
| 69 | 1 | 0 | 6.561460  | -0.203586 | 0.382273  |
| 70 | 1 | 0 | 4.332677  | 1.859668  | 0.801015  |
| 71 | 1 | 0 | 2.614479  | 2.048864  | 0.657556  |
| 72 | 1 | 0 | 2.921008  | 2.006181  | -1.910110 |
| 73 | 1 | 0 | 4.572232  | 1.567711  | -1.642974 |
| 74 | 8 | 0 | 2.845128  | -3.677395 | 1.990972  |
| 75 | 1 | 0 | 3.970807  | -2.039162 | 2.250004  |
| 76 | 6 | 0 | 1.533396  | -0.274727 | 2.740961  |
| 77 | 1 | 0 | 0.728144  | -0.991093 | 2.915921  |
| 78 | 1 | 0 | 2.466946  | -0.685201 | 3.139675  |
| 79 | 1 | 0 | 1.310119  | 0.650027  | 3.273533  |
| 80 | 6 | 0 | -4.535742 | -2.933337 | 0.209275  |
| 81 | 1 | 0 | -5.551042 | -2.657587 | 0.502107  |
| 82 | 1 | 0 | -4.607272 | -3.463908 | -0.743521 |
| 83 | 1 | 0 | -4.175863 | -3.638169 | 0.958983  |
| 84 | 1 | 0 | 4.953916  | 6.008731  | 0.461591  |
| 85 | 1 | 0 | 3.212293  | 6.184346  | 0.758709  |
| 86 | 1 | 0 | 4.335520  | 6.012591  | 2.141436  |

---

| Center<br>Number | Atomic<br>Number | Atomic<br>Type | Coordinates (Angstroms) |           |           |
|------------------|------------------|----------------|-------------------------|-----------|-----------|
|                  |                  |                | X                       | Y         | Z         |
| 1                | 6                | 0              | -0.922885               | 0.106433  | -1.214528 |
| 2                | 6                | 0              | 0.461247                | 0.781073  | -1.166528 |
| 3                | 1                | 0              | -0.944232               | -0.513971 | -2.111327 |
| 4                | 1                | 0              | -1.687295               | 0.876110  | -1.349500 |
| 5                | 1                | 0              | 0.502431                | 1.540210  | -0.384882 |
| 6                | 1                | 0              | 0.631370                | 1.293918  | -2.117941 |
| 7                | 6                | 0              | 3.728703                | -1.067729 | -0.176313 |
| 8                | 6                | 0              | 2.575832                | -1.936573 | 0.391015  |
| 9                | 6                | 0              | 1.351836                | -0.968164 | 0.434028  |
| 10               | 6                | 0              | 1.529005                | -0.283816 | -0.936069 |
| 11               | 6                | 0              | 2.993578                | -2.645239 | 1.661596  |
| 12               | 1                | 0              | 2.289948                | -2.722351 | -0.308198 |
| 13               | 8                | 0              | 1.514612                | 0.063480  | 1.427832  |
| 14               | 6                | 0              | -1.862476               | -2.997509 | 0.835413  |
| 15               | 6                | 0              | -2.347920               | -1.916243 | -0.178660 |
| 16               | 6                | 0              | -1.255285               | -0.749423 | 0.039482  |
| 17               | 6                | 0              | -0.030617               | -1.572935 | 0.496011  |
| 18               | 6                | 0              | -0.383186               | -2.776154 | 0.938546  |
| 19               | 1                | 0              | -2.333128               | -2.868106 | 1.818791  |
| 20               | 1                | 0              | -2.114438               | -4.009740 | 0.508161  |
| 21               | 6                | 0              | -2.228883               | -2.535191 | -1.586065 |
| 22               | 6                | 0              | -1.663755               | 0.207407  | 1.184842  |
| 23               | 1                | 0              | 0.296419                | -3.514422 | 1.344667  |
| 24               | 1                | 0              | -2.543043               | -1.855741 | -2.378802 |
| 25               | 1                | 0              | -1.200378               | -2.835424 | -1.794469 |
| 26               | 1                | 0              | -2.847100               | -3.431757 | -1.659688 |
| 27               | 1                | 0              | -0.856309               | 0.907104  | 1.397350  |
| 28               | 1                | 0              | -2.550047               | 0.789987  | 0.930817  |
| 29               | 1                | 0              | -1.875733               | -0.336339 | 2.107557  |
| 30               | 6                | 0              | -3.829070               | -1.510048 | 0.114280  |
| 31               | 6                | 0              | -4.398358               | -0.493586 | -0.899440 |
| 32               | 6                | 0              | -5.648621               | 0.242699  | -0.446747 |
| 33               | 6                | 0              | -6.240850               | 1.208766  | -1.483592 |
| 34               | 6                | 0              | -6.835256               | 2.335297  | -0.629642 |
| 35               | 6                | 0              | -6.003031               | 2.264306  | 0.648715  |
| 36               | 8                | 0              | -5.330212               | 1.084310  | 0.699454  |
| 37               | 1                | 0              | -6.411267               | -0.462472 | -0.105810 |
| 38               | 1                | 0              | -6.974956               | 0.715842  | -2.122620 |
| 39               | 1                | 0              | -5.442918               | 1.593093  | -2.124143 |
| 40               | 1                | 0              | -6.678326               | 3.319023  | -1.074116 |
| 41               | 6                | 0              | -8.326467               | 2.171138  | -0.301159 |
| 42               | 1                | 0              | -3.836764               | -1.028997 | 1.094377  |
| 43               | 1                | 0              | -4.647176               | -1.004204 | -1.836513 |
| 44               | 1                | 0              | -3.652958               | 0.262903  | -1.149678 |
| 45               | 8                | 0              | -5.924318               | 3.083572  | 1.519802  |
| 46               | 1                | 0              | -8.649615               | 2.937265  | 0.404793  |
| 47               | 1                | 0              | -8.925036               | 2.263980  | -1.209614 |
| 48               | 1                | 0              | -8.534776               | 1.193947  | 0.141878  |
| 49               | 1                | 0              | 1.327248                | -1.081291 | -1.661629 |
| 50               | 6                | 0              | 3.045734                | 0.046389  | -1.100599 |
| 51               | 6                | 0              | 3.419538                | -0.078093 | -2.585301 |

|    |   |   |           |           |           |
|----|---|---|-----------|-----------|-----------|
| 52 | 6 | 0 | 3.337544  | 1.486092  | -0.602352 |
| 53 | 1 | 0 | 4.474715  | 0.124285  | -2.771933 |
| 54 | 1 | 0 | 3.210637  | -1.078821 | -2.965657 |
| 55 | 1 | 0 | 2.841239  | 0.636664  | -3.177390 |
| 56 | 6 | 0 | 4.803221  | 1.959126  | -0.648615 |
| 57 | 6 | 0 | 4.885171  | 3.410025  | -0.236552 |
| 58 | 8 | 0 | 4.638259  | 4.347952  | -0.954476 |
| 59 | 8 | 0 | 5.243588  | 3.544859  | 1.059471  |
| 60 | 6 | 0 | 5.297841  | 4.895752  | 1.552260  |
| 61 | 6 | 0 | 4.864151  | -1.886505 | -0.779563 |
| 62 | 1 | 0 | 4.157163  | -0.532389 | 0.678057  |
| 63 | 6 | 0 | 4.704369  | -3.104369 | -1.297921 |
| 64 | 6 | 0 | 6.240038  | -1.269455 | -0.737307 |
| 65 | 1 | 0 | 5.548930  | -3.647115 | -1.706319 |
| 66 | 1 | 0 | 3.750838  | -3.613756 | -1.340266 |
| 67 | 1 | 0 | 6.993449  | -1.961166 | -1.115165 |
| 68 | 1 | 0 | 6.296270  | -0.355576 | -1.333075 |
| 69 | 1 | 0 | 6.512947  | -0.994180 | 0.286775  |
| 70 | 1 | 0 | 5.201226  | 1.898828  | -1.662369 |
| 71 | 1 | 0 | 5.429866  | 1.364741  | 0.014808  |
| 72 | 1 | 0 | 2.972582  | 1.582728  | 0.420108  |
| 73 | 1 | 0 | 2.753881  | 2.178237  | -1.214665 |
| 74 | 8 | 0 | 2.576913  | -3.718923 | 2.022553  |
| 75 | 1 | 0 | 3.767389  | -2.124616 | 2.264528  |
| 76 | 6 | 0 | 1.362218  | -0.294418 | 2.793633  |
| 77 | 1 | 0 | 1.190570  | 0.633674  | 3.339225  |
| 78 | 1 | 0 | 0.514726  | -0.964536 | 2.952097  |
| 79 | 1 | 0 | 2.266623  | -0.766060 | 3.192122  |
| 80 | 6 | 0 | -4.766989 | -2.727861 | 0.215886  |
| 81 | 1 | 0 | -5.771709 | -2.420061 | 0.512795  |
| 82 | 1 | 0 | -4.858865 | -3.255685 | -0.736718 |
| 83 | 1 | 0 | -4.426977 | -3.444283 | 0.963801  |
| 84 | 1 | 0 | 5.594064  | 4.813727  | 2.594915  |
| 85 | 1 | 0 | 6.028287  | 5.476187  | 0.989292  |
| 86 | 1 | 0 | 4.321239  | 5.371434  | 1.465951  |

---



| Center<br>Number | Atomic<br>Number | Atomic<br>Type | Coordinates (Angstroms) |           |           |
|------------------|------------------|----------------|-------------------------|-----------|-----------|
|                  |                  |                | X                       | Y         | Z         |
| 1                | 6                | 0              | -0.891291               | 0.177000  | -1.150267 |
| 2                | 6                | 0              | 0.492187                | 0.842150  | -1.021083 |
| 3                | 1                | 0              | -0.897842               | -0.366190 | -2.095892 |
| 4                | 1                | 0              | -1.652295               | 0.957333  | -1.233141 |
| 5                | 1                | 0              | 0.518342                | 1.535672  | -0.179779 |
| 6                | 1                | 0              | 0.681146                | 1.430201  | -1.924563 |
| 7                | 6                | 0              | 3.740223                | -1.095289 | -0.135872 |
| 8                | 6                | 0              | 2.575736                | -1.999674 | 0.347538  |
| 9                | 6                | 0              | 1.352746                | -1.033265 | 0.447405  |
| 10               | 6                | 0              | 1.555251                | -0.239413 | -0.858411 |
| 11               | 6                | 0              | 2.973071                | -2.803380 | 1.567062  |
| 12               | 1                | 0              | 2.299057                | -2.729080 | -0.413266 |
| 13               | 8                | 0              | 1.497468                | -0.085815 | 1.522832  |
| 14               | 6                | 0              | -1.868597               | -3.084574 | 0.619354  |
| 15               | 6                | 0              | -2.332639               | -1.924567 | -0.315250 |
| 16               | 6                | 0              | -1.246796               | -0.779796 | 0.021234  |
| 17               | 6                | 0              | -0.031127               | -1.638885 | 0.433492  |
| 18               | 6                | 0              | -0.391820               | -2.872965 | 0.771711  |
| 19               | 1                | 0              | -2.361254               | -3.034070 | 1.599225  |
| 20               | 1                | 0              | -2.112074               | -4.067415 | 0.207019  |
| 21               | 6                | 0              | -2.182509               | -2.428944 | -1.764787 |
| 22               | 6                | 0              | -1.680204               | 0.079846  | 1.232620  |
| 23               | 1                | 0              | 0.280574                | -3.641201 | 1.131782  |
| 24               | 1                | 0              | -2.478137               | -1.687982 | -2.508050 |
| 25               | 1                | 0              | -1.150463               | -2.716319 | -1.973815 |
| 26               | 1                | 0              | -2.801038               | -3.314224 | -1.922382 |
| 27               | 1                | 0              | -0.872780               | 0.750182  | 1.523949  |
| 28               | 1                | 0              | -2.554537               | 0.691051  | 1.004912  |
| 29               | 1                | 0              | -1.920742               | -0.536669 | 2.100999  |
| 30               | 6                | 0              | -3.820541               | -1.542076 | -0.024778 |
| 31               | 6                | 0              | -4.367059               | -0.445925 | -0.966009 |
| 32               | 6                | 0              | -5.613102               | 0.270953  | -0.471960 |
| 33               | 6                | 0              | -6.189468               | 1.310256  | -1.445127 |
| 34               | 6                | 0              | -6.772974               | 2.386706  | -0.521862 |
| 35               | 6                | 0              | -5.948187               | 2.220943  | 0.752542  |
| 36               | 8                | 0              | -5.292196               | 1.030684  | 0.729260  |
| 37               | 1                | 0              | -6.384440               | -0.447547 | -0.182093 |
| 38               | 1                | 0              | -6.927097               | 0.869589  | -2.117400 |
| 39               | 1                | 0              | -5.384152               | 1.725263  | -2.056611 |
| 40               | 1                | 0              | -6.600308               | 3.395019  | -0.900565 |
| 41               | 6                | 0              | -8.267860               | 2.222729  | -0.210558 |
| 42               | 1                | 0              | -3.852292               | -1.143674 | 0.991066  |
| 43               | 1                | 0              | -4.612043               | -0.883357 | -1.940422 |
| 44               | 1                | 0              | -3.611191               | 0.318265  | -1.153662 |
| 45               | 8                | 0              | -5.862509               | 2.981006  | 1.675114  |
| 46               | 1                | 0              | -8.583925               | 2.947166  | 0.541140  |
| 47               | 1                | 0              | -8.860782               | 2.381145  | -1.113643 |
| 48               | 1                | 0              | -8.491630               | 1.222584  | 0.169193  |
| 49               | 1                | 0              | 1.367547                | -0.974304 | -1.650858 |
| 50               | 6                | 0              | 3.074491                | 0.100400  | -0.966755 |
| 51               | 6                | 0              | 3.471942                | 0.111446  | -2.450566 |

|    |   |   |           |           |           |
|----|---|---|-----------|-----------|-----------|
| 52 | 6 | 0 | 3.361997  | 1.485114  | -0.329494 |
| 53 | 1 | 0 | 4.532909  | 0.312797  | -2.602549 |
| 54 | 1 | 0 | 3.254569  | -0.844956 | -2.927963 |
| 55 | 1 | 0 | 2.912839  | 0.887617  | -2.980801 |
| 56 | 6 | 0 | 4.829724  | 1.953115  | -0.312190 |
| 57 | 6 | 0 | 4.939719  | 3.293783  | 0.374050  |
| 58 | 8 | 0 | 5.165655  | 3.458042  | 1.547796  |
| 59 | 8 | 0 | 4.722668  | 4.313217  | -0.487128 |
| 60 | 6 | 0 | 4.755763  | 5.631378  | 0.088255  |
| 61 | 6 | 0 | 4.872456  | -1.868719 | -0.802880 |
| 62 | 1 | 0 | 4.168897  | -0.639318 | 0.763331  |
| 63 | 6 | 0 | 4.703176  | -3.030778 | -1.433984 |
| 64 | 6 | 0 | 6.255261  | -1.275342 | -0.692514 |
| 65 | 1 | 0 | 5.545105  | -3.543331 | -1.884666 |
| 66 | 1 | 0 | 3.744178  | -3.522179 | -1.531108 |
| 67 | 1 | 0 | 7.004647  | -1.942303 | -1.119865 |
| 68 | 1 | 0 | 6.330106  | -0.314748 | -1.207796 |
| 69 | 1 | 0 | 6.519302  | -1.092282 | 0.354168  |
| 70 | 1 | 0 | 5.226233  | 2.041350  | -1.324442 |
| 71 | 1 | 0 | 5.450987  | 1.262143  | 0.255010  |
| 72 | 1 | 0 | 2.988819  | 1.480961  | 0.694016  |
| 73 | 1 | 0 | 2.782133  | 2.233566  | -0.876366 |
| 74 | 8 | 0 | 2.552043  | -3.901999 | 1.836350  |
| 75 | 1 | 0 | 3.735368  | -2.329649 | 2.220978  |
| 76 | 6 | 0 | 1.317136  | -0.548865 | 2.853729  |
| 77 | 1 | 0 | 1.148493  | 0.335971  | 3.467503  |
| 78 | 1 | 0 | 0.458767  | -1.217832 | 2.944241  |
| 79 | 1 | 0 | 2.208610  | -1.062291 | 3.228510  |
| 80 | 6 | 0 | -4.760257 | -2.762467 | -0.047106 |
| 81 | 1 | 0 | -5.774260 | -2.476513 | 0.240391  |
| 82 | 1 | 0 | -4.820953 | -3.214517 | -1.040191 |
| 83 | 1 | 0 | -4.442936 | -3.534840 | 0.653571  |
| 84 | 1 | 0 | 5.732892  | 5.829434  | 0.528058  |
| 85 | 1 | 0 | 4.560427  | 6.313786  | -0.735080 |
| 86 | 1 | 0 | 3.991512  | 5.729233  | 0.858899  |

---

| Center<br>Number | Atomic<br>Number | Atomic<br>Type | Coordinates (Angstroms) |           |           |
|------------------|------------------|----------------|-------------------------|-----------|-----------|
|                  |                  |                | X                       | Y         | Z         |
| 1                | 6                | 0              | -1.109220               | 0.060790  | -1.149300 |
| 2                | 6                | 0              | 0.271920                | 0.741590  | -1.120460 |
| 3                | 1                | 0              | -1.145960               | -0.546790 | -2.054200 |
| 4                | 1                | 0              | -1.881690               | 0.826670  | -1.257850 |
| 5                | 1                | 0              | 0.326070                | 1.493610  | -0.332750 |
| 6                | 1                | 0              | 0.422410                | 1.263440  | -2.070010 |
| 7                | 6                | 0              | 3.572040                | -1.137611 | -0.279050 |
| 8                | 6                | 0              | 2.445950                | -1.953970 | 0.402170  |
| 9                | 6                | 0              | 1.204970                | -1.009970 | 0.452460  |
| 10               | 6                | 0              | 1.347390                | -0.320620 | -0.919680 |
| 11               | 6                | 0              | 2.893980                | -2.616820 | 1.684420  |
| 12               | 1                | 0              | 2.137820                | -2.788440 | -0.237520 |
| 13               | 8                | 0              | 1.354340                | 0.026040  | 1.443660  |
| 14               | 6                | 0              | -1.995780               | -3.074300 | 0.878800  |
| 15               | 6                | 0              | -2.499420               | -1.988090 | -0.121230 |
| 16               | 6                | 0              | -1.413570               | -0.815160 | 0.097810  |
| 17               | 6                | 0              | -0.172810               | -1.630500 | 0.529310  |
| 18               | 6                | 0              | -0.517670               | -2.838460 | 0.964260  |
| 19               | 1                | 0              | -2.457340               | -2.956670 | 1.867780  |
| 20               | 1                | 0              | -2.241720               | -4.085650 | 0.544640  |
| 21               | 6                | 0              | -2.388100               | -2.594960 | -1.534490 |
| 22               | 6                | 0              | -1.812270               | 0.120130  | 1.263950  |
| 23               | 1                | 0              | 0.161760                | -3.584710 | 1.357550  |
| 24               | 1                | 0              | -2.714820               | -1.912020 | -2.318770 |
| 25               | 1                | 0              | -1.359420               | -2.885230 | -1.755990 |
| 26               | 1                | 0              | -3.000950               | -3.495090 | -1.609140 |
| 27               | 1                | 0              | -1.009790               | 0.826150  | 1.472200  |
| 28               | 1                | 0              | -2.708400               | 0.696280  | 1.031470  |
| 29               | 1                | 0              | -2.005750               | -0.437220 | 2.182320  |
| 30               | 6                | 0              | -3.981490               | -1.598470 | 0.191350  |
| 31               | 6                | 0              | -4.566580               | -0.565559 | -0.795630 |
| 32               | 6                | 0              | -5.870840               | 0.091401  | -0.348840 |
| 33               | 6                | 0              | -6.384050               | 1.188031  | -1.300570 |
| 34               | 6                | 0              | -5.842479               | 2.485311  | -0.691420 |
| 35               | 6                | 0              | -5.658759               | 2.120141  | 0.778990  |
| 36               | 8                | 0              | -5.681030               | 0.769561  | 0.926500  |
| 37               | 1                | 0              | -6.635810               | -0.661709 | -0.164210 |
| 38               | 1                | 0              | -7.476790               | 1.206351  | -1.296930 |
| 39               | 1                | 0              | -6.057380               | 1.022201  | -2.327530 |
| 40               | 1                | 0              | -4.832179               | 2.682191  | -1.069530 |
| 41               | 6                | 0              | -6.692509               | 3.735841  | -0.890800 |
| 42               | 1                | 0              | -3.985720               | -1.137660 | 1.180870  |
| 43               | 1                | 0              | -4.767340               | -1.045979 | -1.759300 |
| 44               | 1                | 0              | -3.840650               | 0.225500  | -0.993900 |
| 45               | 8                | 0              | -5.500679               | 2.861641  | 1.707000  |
| 46               | 1                | 0              | -6.270959               | 4.575801  | -0.337820 |
| 47               | 1                | 0              | -6.741469               | 4.005471  | -1.947830 |
| 48               | 1                | 0              | -7.712279               | 3.575081  | -0.533020 |
| 49               | 1                | 0              | 1.130920                | -1.118350 | -1.642080 |
| 50               | 6                | 0              | 2.856050                | 0.011400  | -1.127200 |
| 51               | 6                | 0              | 3.168190                | -0.028130 | -2.631140 |

|    |   |   |           |           |           |
|----|---|---|-----------|-----------|-----------|
| 52 | 6 | 0 | 3.194840  | 1.419780  | -0.571040 |
| 53 | 1 | 0 | 4.228380  | 0.115619  | -2.842340 |
| 54 | 1 | 0 | 2.882260  | -0.980820 | -3.077110 |
| 55 | 1 | 0 | 2.620390  | 0.766020  | -3.146160 |
| 56 | 6 | 0 | 4.665521  | 1.862089  | -0.693340 |
| 57 | 6 | 0 | 4.816781  | 3.290269  | -0.224560 |
| 58 | 8 | 0 | 4.411791  | 4.258449  | -0.820990 |
| 59 | 8 | 0 | 5.447811  | 3.367929  | 0.967340  |
| 60 | 6 | 0 | 5.604701  | 4.694079  | 1.502700  |
| 61 | 6 | 0 | 4.585070  | -2.012561 | -1.009740 |
| 62 | 1 | 0 | 4.118960  | -0.647491 | 0.527610  |
| 63 | 6 | 0 | 4.253150  | -3.077471 | -1.738220 |
| 64 | 6 | 0 | 6.029460  | -1.615791 | -0.854530 |
| 65 | 1 | 0 | 5.009930  | -3.668581 | -2.240600 |
| 66 | 1 | 0 | 3.229320  | -3.406640 | -1.873380 |
| 67 | 1 | 0 | 6.693570  | -2.308821 | -1.372350 |
| 68 | 1 | 0 | 6.214040  | -0.612691 | -1.250240 |
| 69 | 1 | 0 | 6.304170  | -1.596021 | 0.204370  |
| 70 | 1 | 0 | 4.989811  | 1.840249  | -1.735200 |
| 71 | 1 | 0 | 5.322800  | 1.220579  | -0.107890 |
| 72 | 1 | 0 | 2.900960  | 1.465040  | 0.477310  |
| 73 | 1 | 0 | 2.587481  | 2.155870  | -1.103630 |
| 74 | 8 | 0 | 4.003320  | -2.530911 | 2.151920  |
| 75 | 1 | 0 | 2.135580  | -3.249690 | 2.187750  |
| 76 | 6 | 0 | 1.244370  | -0.330700 | 2.815500  |
| 77 | 1 | 0 | 0.414860  | -1.019310 | 2.994860  |
| 78 | 1 | 0 | 2.170240  | -0.770030 | 3.195620  |
| 79 | 1 | 0 | 1.055380  | 0.595500  | 3.358690  |
| 80 | 6 | 0 | -4.909700 | -2.825169 | 0.277190  |
| 81 | 1 | 0 | -5.902290 | -2.535749 | 0.626940  |
| 82 | 1 | 0 | -5.035740 | -3.314299 | -0.692130 |
| 83 | 1 | 0 | -4.538120 | -3.569759 | 0.981200  |
| 84 | 1 | 0 | 6.121201  | 4.565929  | 2.450540  |
| 85 | 1 | 0 | 6.193451  | 5.310549  | 0.823850  |
| 86 | 1 | 0 | 4.631551  | 5.160419  | 1.654470  |

---

| Center<br>Number | Atomic<br>Number | Atomic<br>Type | Coordinates (Angstroms) |           |           |
|------------------|------------------|----------------|-------------------------|-----------|-----------|
|                  |                  |                | X                       | Y         | Z         |
| 1                | 6                | 0              | -0.722656               | 0.217965  | -1.064127 |
| 2                | 6                | 0              | 0.656623                | 0.856726  | -0.809889 |
| 3                | 1                | 0              | -0.697104               | -0.198818 | -2.071727 |
| 4                | 1                | 0              | -1.480050               | 1.006196  | -1.072512 |
| 5                | 1                | 0              | 0.655230                | 1.447287  | 0.107829  |
| 6                | 1                | 0              | 0.865757                | 1.541972  | -1.635528 |
| 7                | 6                | 0              | 3.858235                | -1.142587 | 0.056700  |
| 8                | 6                | 0              | 2.698111                | -2.135409 | 0.283097  |
| 9                | 6                | 0              | 1.460499                | -1.191039 | 0.439459  |
| 10               | 6                | 0              | 1.720395                | -0.235923 | -0.742694 |
| 11               | 6                | 0              | 3.015856                | -3.113638 | 1.393740  |
| 12               | 1                | 0              | 2.495800                | -2.737333 | -0.604808 |
| 13               | 8                | 0              | 1.552889                | -0.378993 | 1.627422  |
| 14               | 6                | 0              | -1.754785               | -3.244864 | 0.216094  |
| 15               | 6                | 0              | -2.193734               | -1.965906 | -0.562495 |
| 16               | 6                | 0              | -1.119677               | -0.880875 | -0.040749 |
| 17               | 6                | 0              | 0.082570                | -1.789467 | 0.293159  |
| 18               | 6                | 0              | -0.284678               | -3.058317 | 0.444062  |
| 19               | 1                | 0              | -2.277409               | -3.329949 | 1.177695  |
| 20               | 1                | 0              | -1.981952               | -4.160585 | -0.336347 |
| 21               | 6                | 0              | -1.999909               | -2.266771 | -2.062469 |
| 22               | 6                | 0              | -1.597159               | -0.186232 | 1.256972  |
| 23               | 1                | 0              | 0.377927                | -3.869882 | 0.715496  |
| 24               | 1                | 0              | -2.277806               | -1.430676 | -2.704705 |
| 25               | 1                | 0              | -0.960586               | -2.520825 | -2.278847 |
| 26               | 1                | 0              | -2.607850               | -3.123287 | -2.359406 |
| 27               | 1                | 0              | -0.808116               | 0.451048  | 1.653557  |
| 28               | 1                | 0              | -2.475076               | 0.437567  | 1.084446  |
| 29               | 1                | 0              | -1.852346               | -0.910797 | 2.032810  |
| 30               | 6                | 0              | -3.690135               | -1.625025 | -0.264309 |
| 31               | 6                | 0              | -4.211336               | -0.402630 | -1.052354 |
| 32               | 6                | 0              | -5.487772               | 0.219771  | -0.510361 |
| 33               | 6                | 0              | -6.024717               | 1.409013  | -1.320716 |
| 34               | 6                | 0              | -6.668842               | 2.308794  | -0.258878 |
| 35               | 6                | 0              | -5.909396               | 1.929344  | 1.010286  |
| 36               | 8                | 0              | -5.237119               | 0.763939  | 0.817904  |
| 37               | 1                | 0              | -6.265769               | -0.538509 | -0.388117 |
| 38               | 1                | 0              | -6.721263               | 1.088717  | -2.096868 |
| 39               | 1                | 0              | -5.193665               | 1.925386  | -1.808155 |
| 40               | 1                | 0              | -6.489792               | 3.367822  | -0.449410 |
| 41               | 6                | 0              | -8.175820               | 2.088173  | -0.061235 |
| 42               | 1                | 0              | -3.750907               | -1.374242 | 0.796450  |
| 43               | 1                | 0              | -4.408890               | -0.687974 | -2.091736 |
| 44               | 1                | 0              | -3.458182               | 0.386166  | -1.086923 |
| 45               | 8                | 0              | -5.882181               | 2.519359  | 2.053074  |
| 46               | 1                | 0              | -8.540109               | 2.670813  | 0.785850  |
| 47               | 1                | 0              | -8.722448               | 2.397970  | -0.954232 |
| 48               | 1                | 0              | -8.406518               | 1.036700  | 0.127869  |
| 49               | 1                | 0              | 1.562695                | -0.862154 | -1.629263 |
| 50               | 6                | 0              | 3.248316                | 0.096089  | -0.749528 |
| 51               | 6                | 0              | 3.726980                | 0.139365  | -2.209635 |

|    |   |   |           |           |           |
|----|---|---|-----------|-----------|-----------|
| 52 | 6 | 0 | 3.655769  | 1.391217  | 0.004330  |
| 53 | 1 | 0 | 4.772243  | 0.443984  | -2.296289 |
| 54 | 1 | 0 | 3.631037  | -0.838389 | -2.684246 |
| 55 | 1 | 0 | 3.128976  | 0.845744  | -2.791065 |
| 56 | 6 | 0 | 3.401910  | 2.731825  | -0.690963 |
| 57 | 6 | 0 | 4.051978  | 3.887451  | 0.039850  |
| 58 | 8 | 0 | 4.951664  | 3.805493  | 0.838766  |
| 59 | 8 | 0 | 3.507645  | 5.065105  | -0.339891 |
| 60 | 6 | 0 | 4.085936  | 6.240195  | 0.255549  |
| 61 | 6 | 0 | 5.139438  | -1.752584 | -0.481713 |
| 62 | 1 | 0 | 4.105855  | -0.747395 | 1.048094  |
| 63 | 6 | 0 | 5.190436  | -2.924541 | -1.115359 |
| 64 | 6 | 0 | 6.405151  | -0.974215 | -0.218348 |
| 65 | 1 | 0 | 6.134554  | -3.325173 | -1.466231 |
| 66 | 1 | 0 | 4.315968  | -3.532991 | -1.305674 |
| 67 | 1 | 0 | 6.545320  | -0.814018 | 0.855519  |
| 68 | 1 | 0 | 7.280110  | -1.499443 | -0.602949 |
| 69 | 1 | 0 | 6.378797  | 0.017322  | -0.677610 |
| 70 | 1 | 0 | 2.343326  | 2.960827  | -0.804086 |
| 71 | 1 | 0 | 3.822716  | 2.741921  | -1.701733 |
| 72 | 1 | 0 | 4.726818  | 1.338749  | 0.208950  |
| 73 | 1 | 0 | 3.166015  | 1.394145  | 0.979042  |
| 74 | 8 | 0 | 2.591092  | -4.241591 | 1.463190  |
| 75 | 1 | 0 | 3.720750  | -2.743223 | 2.166824  |
| 76 | 6 | 0 | 1.336515  | -1.007380 | 2.882931  |
| 77 | 1 | 0 | 0.523608  | -1.735772 | 2.843483  |
| 78 | 1 | 0 | 2.242255  | -1.504261 | 3.246467  |
| 79 | 1 | 0 | 1.073707  | -0.217036 | 3.586404  |
| 80 | 6 | 0 | -4.625853 | -2.827864 | -0.487517 |
| 81 | 1 | 0 | -5.644468 | -2.590729 | -0.173450 |
| 82 | 1 | 0 | -4.671058 | -3.121973 | -1.539082 |
| 83 | 1 | 0 | -4.315147 | -3.698003 | 0.090648  |
| 84 | 1 | 0 | 3.976589  | 6.210745  | 1.339286  |
| 85 | 1 | 0 | 5.144183  | 6.313002  | 0.005465  |
| 86 | 1 | 0 | 3.534865  | 7.078894  | -0.162259 |

---

| Center<br>Number | Atomic<br>Number | Atomic<br>Type | Coordinates (Angstroms) |           |           |
|------------------|------------------|----------------|-------------------------|-----------|-----------|
|                  |                  |                | X                       | Y         | Z         |
| 1                | 6                | 0              | -1.263002               | 0.287461  | -1.157174 |
| 2                | 6                | 0              | 0.076790                | 1.046069  | -1.107159 |
| 3                | 1                | 0              | -1.279654               | -0.270106 | -2.094414 |
| 4                | 1                | 0              | -2.079020               | 1.013032  | -1.211665 |
| 5                | 1                | 0              | 0.098134                | 1.748458  | -0.273310 |
| 6                | 1                | 0              | 0.175626                | 1.634725  | -2.024555 |
| 7                | 6                | 0              | 3.489709                | -0.664572 | -0.375596 |
| 8                | 6                | 0              | 2.411608                | -1.633413 | 0.177672  |
| 9                | 6                | 0              | 1.134975                | -0.747436 | 0.331194  |
| 10               | 6                | 0              | 1.219365                | 0.040710  | -0.989516 |
| 11               | 6                | 0              | 2.923352                | -2.393579 | 1.382844  |
| 12               | 1                | 0              | 2.139953                | -2.390591 | -0.557999 |
| 13               | 8                | 0              | 1.260669                | 0.224899  | 1.384600  |
| 14               | 6                | 0              | -1.931839               | -3.001426 | 0.698505  |
| 15               | 6                | 0              | -2.521153               | -1.887247 | -0.220433 |
| 16               | 6                | 0              | -1.493460               | -0.672115 | 0.042818  |
| 17               | 6                | 0              | -0.203804               | -1.444629 | 0.395783  |
| 18               | 6                | 0              | -0.465644               | -2.694897 | 0.764659  |
| 19               | 1                | 0              | -2.371173               | -2.968771 | 1.704025  |
| 20               | 1                | 0              | -2.134049               | -4.003394 | 0.310624  |
| 21               | 6                | 0              | -2.418305               | -2.402768 | -1.669981 |
| 22               | 6                | 0              | -1.912798               | 0.174155  | 1.268419  |
| 23               | 1                | 0              | 0.273453                | -3.414410 | 1.093125  |
| 24               | 1                | 0              | -2.794570               | -1.690553 | -2.404702 |
| 25               | 1                | 0              | -1.383655               | -2.633541 | -1.929893 |
| 26               | 1                | 0              | -2.992612               | -3.323882 | -1.784140 |
| 27               | 1                | 0              | -1.141570               | 0.906941  | 1.500974  |
| 28               | 1                | 0              | -2.842802               | 0.715504  | 1.089907  |
| 29               | 1                | 0              | -2.053874               | -0.443505 | 2.157383  |
| 30               | 6                | 0              | -4.013668               | -1.597291 | 0.148598  |
| 31               | 6                | 0              | -4.681110               | -0.550637 | -0.770314 |
| 32               | 6                | 0              | -5.986309               | 0.039503  | -0.241988 |
| 33               | 6                | 0              | -6.604909               | 1.119608  | -1.149186 |
| 34               | 6                | 0              | -6.086082               | 2.434906  | -0.559732 |
| 35               | 6                | 0              | -5.798438               | 2.066250  | 0.893190  |
| 36               | 8                | 0              | -5.755112               | 0.715745  | 1.028360  |
| 37               | 1                | 0              | -6.703696               | -0.749960 | -0.021755 |
| 38               | 1                | 0              | -7.695187               | 1.088438  | -1.079269 |
| 39               | 1                | 0              | -6.334137               | 0.976754  | -2.195646 |
| 40               | 1                | 0              | -5.110623               | 2.680957  | -0.995981 |
| 41               | 6                | 0              | -7.002133               | 3.647039  | -0.693744 |
| 42               | 1                | 0              | -4.017398               | -1.189687 | 1.161092  |
| 43               | 1                | 0              | -4.907669               | -1.004743 | -1.741033 |
| 44               | 1                | 0              | -3.994635               | 0.274245  | -0.971024 |
| 45               | 8                | 0              | -5.617112               | 2.808115  | 1.817029  |
| 46               | 1                | 0              | -6.586726               | 4.500620  | -0.157131 |
| 47               | 1                | 0              | -7.126829               | 3.923340  | -1.742870 |
| 48               | 1                | 0              | -7.990277               | 3.436552  | -0.277759 |
| 49               | 1                | 0              | 1.043118                | -0.715011 | -1.764728 |
| 50               | 6                | 0              | 2.707575                | 0.480873  | -1.176865 |
| 51               | 6                | 0              | 3.016562                | 0.498630  | -2.682183 |

|    |   |   |           |           |           |
|----|---|---|-----------|-----------|-----------|
| 52 | 6 | 0 | 2.924435  | 1.897336  | -0.575755 |
| 53 | 1 | 0 | 4.047132  | 0.780265  | -2.902161 |
| 54 | 1 | 0 | 2.849890  | -0.480013 | -3.133947 |
| 55 | 1 | 0 | 2.367251  | 1.218736  | -3.188666 |
| 56 | 6 | 0 | 4.302739  | 2.562833  | -0.698384 |
| 57 | 6 | 0 | 5.263412  | 2.312080  | 0.444313  |
| 58 | 8 | 0 | 5.009255  | 1.763378  | 1.488492  |
| 59 | 8 | 0 | 6.477938  | 2.832761  | 0.164379  |
| 60 | 6 | 0 | 7.464661  | 2.719670  | 1.205222  |
| 61 | 6 | 0 | 4.624318  | -1.373029 | -1.105274 |
| 62 | 1 | 0 | 3.938605  | -0.173673 | 0.490967  |
| 63 | 6 | 0 | 4.498720  | -2.552651 | -1.713677 |
| 64 | 6 | 0 | 5.966793  | -0.686505 | -1.076365 |
| 65 | 1 | 0 | 5.345799  | -3.013534 | -2.208669 |
| 66 | 1 | 0 | 3.572058  | -3.110235 | -1.745518 |
| 67 | 1 | 0 | 6.725731  | -1.278008 | -1.589721 |
| 68 | 1 | 0 | 5.934337  | 0.297114  | -1.551666 |
| 69 | 1 | 0 | 6.293841  | -0.526904 | -0.044517 |
| 70 | 1 | 0 | 4.170210  | 3.650485  | -0.716883 |
| 71 | 1 | 0 | 4.816193  | 2.335617  | -1.634301 |
| 72 | 1 | 0 | 2.639881  | 1.883017  | 0.474905  |
| 73 | 1 | 0 | 2.216840  | 2.560286  | -1.079807 |
| 74 | 8 | 0 | 2.581574  | -3.510947 | 1.688002  |
| 75 | 1 | 0 | 3.691424  | -1.868079 | 1.986904  |
| 76 | 6 | 0 | 1.234243  | -0.236263 | 2.727831  |
| 77 | 1 | 0 | 0.943454  | 0.614491  | 3.344543  |
| 78 | 1 | 0 | 0.513229  | -1.044422 | 2.870880  |
| 79 | 1 | 0 | 2.223312  | -0.573207 | 3.053701  |
| 80 | 6 | 0 | -4.871818 | -2.876170 | 0.189787  |
| 81 | 1 | 0 | -5.875729 | -2.657519 | 0.558955  |
| 82 | 1 | 0 | -4.980326 | -3.329526 | -0.798855 |
| 83 | 1 | 0 | -4.452023 | -3.627627 | 0.858489  |
| 84 | 1 | 0 | 7.664082  | 1.672087  | 1.429445  |
| 85 | 1 | 0 | 8.356291  | 3.202888  | 0.814066  |
| 86 | 1 | 0 | 7.122000  | 3.219773  | 2.110668  |

---



| Center<br>Number | Atomic<br>Number | Atomic<br>Type | Coordinates (Angstroms) |           |           |
|------------------|------------------|----------------|-------------------------|-----------|-----------|
|                  |                  |                | X                       | Y         | Z         |
| 1                | 6                | 0              | -0.924902               | 0.011902  | -1.177020 |
| 2                | 6                | 0              | 0.444043                | 0.721895  | -1.162551 |
| 3                | 1                | 0              | -0.970013               | -0.564295 | -2.101632 |
| 4                | 1                | 0              | -1.714110               | 0.765484  | -1.241735 |
| 5                | 1                | 0              | 0.494111                | 1.469096  | -0.369760 |
| 6                | 1                | 0              | 0.565810                | 1.255001  | -2.109665 |
| 7                | 6                | 0              | 3.788214                | -0.929571 | -0.207312 |
| 8                | 6                | 0              | 2.718065                | -1.922393 | 0.302500  |
| 9                | 6                | 0              | 1.433069                | -1.031675 | 0.371395  |
| 10               | 6                | 0              | 1.537913                | -0.327396 | -0.995312 |
| 11               | 6                | 0              | 3.168916                | -2.641331 | 1.555628  |
| 12               | 1                | 0              | 2.502591                | -2.698417 | -0.435053 |
| 13               | 8                | 0              | 1.556327                | -0.003670 | 1.374635  |
| 14               | 6                | 0              | -1.677983               | -3.216027 | 0.764081  |
| 15               | 6                | 0              | -2.228042               | -2.122098 | -0.203030 |
| 16               | 6                | 0              | -1.186512               | -0.914647 | 0.045137  |
| 17               | 6                | 0              | 0.082668                | -1.700196 | 0.448248  |
| 18               | 6                | 0              | -0.208438               | -2.932328 | 0.853275  |
| 19               | 1                | 0              | -2.139155               | -3.144337 | 1.757844  |
| 20               | 1                | 0              | -1.888188               | -4.226281 | 0.403215  |
| 21               | 6                | 0              | -2.100719               | -2.684557 | -1.633073 |
| 22               | 6                | 0              | -1.617332               | -0.028283 | 1.237777  |
| 23               | 1                | 0              | 0.511339                | -3.652713 | 1.220510  |
| 24               | 1                | 0              | -2.458930               | -1.994668 | -2.397481 |
| 25               | 1                | 0              | -1.062763               | -2.928967 | -1.866028 |
| 26               | 1                | 0              | -2.678139               | -3.605718 | -1.728762 |
| 27               | 1                | 0              | -0.846565               | 0.709707  | 1.455755  |
| 28               | 1                | 0              | -2.541199               | 0.511710  | 1.028380  |
| 29               | 1                | 0              | -1.775330               | -0.615867 | 2.144016  |
| 30               | 6                | 0              | -3.723060               | -1.798883 | 0.124381  |
| 31               | 6                | 0              | -4.351939               | -0.759998 | -0.829678 |
| 32               | 6                | 0              | -5.662177               | -0.144529 | -0.343741 |
| 33               | 6                | 0              | -6.234742               | 0.941664  | -1.273437 |
| 34               | 6                | 0              | -5.715229               | 2.251457  | -0.671864 |
| 35               | 6                | 0              | -5.475850               | 1.883546  | 0.789843  |
| 36               | 8                | 0              | -5.456834               | 0.532847  | 0.930263  |
| 37               | 1                | 0              | -6.399047               | -0.920818 | -0.141683 |
| 38               | 1                | 0              | -7.327009               | 0.927122  | -1.238772 |
| 39               | 1                | 0              | -5.932575               | 0.791185  | -2.310194 |
| 40               | 1                | 0              | -4.723845               | 2.482758  | -1.079257 |
| 41               | 6                | 0              | -6.609952               | 3.475761  | -0.836159 |
| 42               | 1                | 0              | -3.742405               | -1.370338 | 1.128058  |
| 43               | 1                | 0              | -4.559780               | -1.226879 | -1.798537 |
| 44               | 1                | 0              | -3.649912               | 0.052689  | -1.026434 |
| 45               | 8                | 0              | -5.309556               | 2.625142  | 1.716702  |
| 46               | 1                | 0              | -6.198543               | 4.325112  | -0.289883 |
| 47               | 1                | 0              | -6.699651               | 3.750559  | -1.889191 |
| 48               | 1                | 0              | -7.612768               | 3.280250  | -0.448944 |
| 49               | 1                | 0              | 1.288195                | -1.121667 | -1.707802 |
| 50               | 6                | 0              | 3.049292                | -0.008703 | -1.270921 |
| 51               | 6                | 0              | 3.352416                | -0.452454 | -2.715855 |

|    |   |   |           |           |           |
|----|---|---|-----------|-----------|-----------|
| 52 | 6 | 0 | 3.428790  | 1.492103  | -1.192523 |
| 53 | 1 | 0 | 4.389670  | -0.262247 | -2.997074 |
| 54 | 1 | 0 | 3.163177  | -1.518000 | -2.857436 |
| 55 | 1 | 0 | 2.715898  | 0.097392  | -3.415145 |
| 56 | 6 | 0 | 3.417102  | 2.195466  | 0.164615  |
| 57 | 6 | 0 | 3.562679  | 3.694878  | 0.036094  |
| 58 | 8 | 0 | 3.428878  | 4.339870  | -0.974796 |
| 59 | 8 | 0 | 3.848054  | 4.254603  | 1.233708  |
| 60 | 6 | 0 | 3.958262  | 5.688538  | 1.241317  |
| 61 | 6 | 0 | 5.102729  | -1.552870 | -0.636267 |
| 62 | 1 | 0 | 4.021647  | -0.289086 | 0.648957  |
| 63 | 6 | 0 | 5.245534  | -2.842791 | -0.940827 |
| 64 | 6 | 0 | 6.292199  | -0.625211 | -0.660324 |
| 65 | 1 | 0 | 6.211631  | -3.242170 | -1.227310 |
| 66 | 1 | 0 | 4.426486  | -3.549894 | -0.916846 |
| 67 | 1 | 0 | 7.201270  | -1.151085 | -0.953761 |
| 68 | 1 | 0 | 6.144285  | 0.206357  | -1.354376 |
| 69 | 1 | 0 | 6.458098  | -0.181702 | 0.327107  |
| 70 | 1 | 0 | 4.214203  | 1.844237  | 0.823399  |
| 71 | 1 | 0 | 2.490531  | 2.005332  | 0.710081  |
| 72 | 1 | 0 | 2.764966  | 2.040492  | -1.864119 |
| 73 | 1 | 0 | 4.424554  | 1.616184  | -1.627444 |
| 74 | 8 | 0 | 2.805597  | -3.744337 | 1.885705  |
| 75 | 1 | 0 | 3.909828  | -2.096944 | 2.177124  |
| 76 | 6 | 0 | 1.456847  | -0.386530 | 2.739582  |
| 77 | 1 | 0 | 1.210521  | 0.515931  | 3.299555  |
| 78 | 1 | 0 | 0.674947  | -1.131370 | 2.900790  |
| 79 | 1 | 0 | 2.405901  | -0.779169 | 3.118940  |
| 80 | 6 | 0 | -4.603658 | -3.062185 | 0.172755  |
| 81 | 1 | 0 | -5.609471 | -2.820209 | 0.521363  |
| 82 | 1 | 0 | -4.703772 | -3.530559 | -0.809686 |
| 83 | 1 | 0 | -4.208150 | -3.809250 | 0.860882  |
| 84 | 1 | 0 | 4.758284  | 6.012942  | 0.576259  |
| 85 | 1 | 0 | 3.021614  | 6.144547  | 0.921270  |
| 86 | 1 | 0 | 4.182813  | 5.957610  | 2.270355  |

---

| Center<br>Number | Atomic<br>Number | Atomic<br>Type | Coordinates (Angstroms) |           |           |
|------------------|------------------|----------------|-------------------------|-----------|-----------|
|                  |                  |                | X                       | Y         | Z         |
| 1                | 6                | 0              | -0.960672               | 0.216039  | -1.156766 |
| 2                | 6                | 0              | 0.435481                | 0.859981  | -1.054185 |
| 3                | 1                | 0              | -0.982700               | -0.352123 | -2.087514 |
| 4                | 1                | 0              | -1.708649               | 1.006874  | -1.256627 |
| 5                | 1                | 0              | 0.482298                | 1.578226  | -0.234891 |
| 6                | 1                | 0              | 0.630336                | 1.417404  | -1.975493 |
| 7                | 6                | 0              | 3.653015                | -1.092603 | -0.110954 |
| 8                | 6                | 0              | 2.477561                | -1.976598 | 0.395062  |
| 9                | 6                | 0              | 1.270851                | -0.984345 | 0.466332  |
| 10               | 6                | 0              | 1.478481                | -0.236318 | -0.866440 |
| 11               | 6                | 0              | 2.863408                | -2.736518 | 1.642851  |
| 12               | 1                | 0              | 2.200406                | -2.728946 | -0.344552 |
| 13               | 8                | 0              | 1.440340                | -0.006389 | 1.510473  |
| 14               | 6                | 0              | -1.978924               | -2.979843 | 0.712067  |
| 15               | 6                | 0              | -2.428453               | -1.842395 | -0.257195 |
| 16               | 6                | 0              | -1.326587               | -0.702644 | 0.042596  |
| 17               | 6                | 0              | -0.121945               | -1.566722 | 0.477659  |
| 18               | 6                | 0              | -0.498875               | -2.784618 | 0.854332  |
| 19               | 1                | 0              | -2.468784               | -2.891496 | 1.690683  |
| 20               | 1                | 0              | -2.237362               | -3.971205 | 0.330536  |
| 21               | 6                | 0              | -2.286946               | -2.392410 | -1.690812 |
| 22               | 6                | 0              | -1.744477               | 0.198199  | 1.229185  |
| 23               | 1                | 0              | 0.162832                | -3.552775 | 1.234261  |
| 24               | 1                | 0              | -2.577856               | -1.671860 | -2.455675 |
| 25               | 1                | 0              | -1.257963               | -2.694968 | -1.893376 |
| 26               | 1                | 0              | -2.913868               | -3.276442 | -1.819896 |
| 27               | 1                | 0              | -0.930918               | 0.872928  | 1.492482  |
| 28               | 1                | 0              | -2.615805               | 0.808305  | 0.988157  |
| 29               | 1                | 0              | -1.984124               | -0.388174 | 2.118365  |
| 30               | 6                | 0              | -3.910351               | -1.431904 | 0.024809  |
| 31               | 6                | 0              | -4.441467               | -0.349171 | -0.939900 |
| 32               | 6                | 0              | -5.693674               | 0.376045  | -0.474330 |
| 33               | 6                | 0              | -6.240485               | 1.419856  | -1.459526 |
| 34               | 6                | 0              | -6.842339               | 2.496656  | -0.548380 |
| 35               | 6                | 0              | -6.051151               | 2.323967  | 0.746316  |
| 36               | 8                | 0              | -5.396957               | 1.132350  | 0.735007  |
| 37               | 1                | 0              | -6.476600               | -0.337575 | -0.204245 |
| 38               | 1                | 0              | -6.963009               | 0.984018  | -2.151094 |
| 39               | 1                | 0              | -5.418219               | 1.832737  | -2.049443 |
| 40               | 1                | 0              | -6.655497               | 3.505083  | -0.919917 |
| 41               | 6                | 0              | -8.345381               | 2.338671  | -0.275583 |
| 42               | 1                | 0              | -3.934912               | -1.009593 | 1.031214  |
| 43               | 1                | 0              | -4.673444               | -0.799306 | -1.911730 |
| 44               | 1                | 0              | -3.681103               | 0.410656  | -1.126923 |
| 45               | 8                | 0              | -5.988484               | 3.079590  | 1.674252  |
| 46               | 1                | 0              | -8.677381               | 3.063355  | 0.468973  |
| 47               | 1                | 0              | -8.914399               | 2.500833  | -1.193262 |
| 48               | 1                | 0              | -8.582982               | 1.338955  | 0.096900  |
| 49               | 1                | 0              | 1.265344                | -0.993946 | -1.630710 |
| 50               | 6                | 0              | 3.001324                | 0.064527  | -1.001109 |
| 51               | 6                | 0              | 3.400677                | 0.026490  | -2.486214 |

|    |   |   |           |           |           |
|----|---|---|-----------|-----------|-----------|
| 52 | 6 | 0 | 3.349670  | 1.462573  | -0.426790 |
| 53 | 1 | 0 | 4.482970  | 0.030684  | -2.621585 |
| 54 | 1 | 0 | 3.009247  | -0.855897 | -2.993968 |
| 55 | 1 | 0 | 2.997068  | 0.901281  | -3.003745 |
| 56 | 6 | 0 | 4.822522  | 1.867881  | -0.503419 |
| 57 | 6 | 0 | 5.062844  | 3.273140  | 0.002794  |
| 58 | 8 | 0 | 4.221809  | 4.121197  | 0.167692  |
| 59 | 8 | 0 | 6.378610  | 3.483667  | 0.236105  |
| 60 | 6 | 0 | 6.728358  | 4.806856  | 0.678433  |
| 61 | 6 | 0 | 4.792259  | -1.910728 | -0.701524 |
| 62 | 1 | 0 | 4.061568  | -0.594287 | 0.771448  |
| 63 | 6 | 0 | 6.052423  | -1.688022 | -0.326818 |
| 64 | 6 | 0 | 4.477064  | -3.032048 | -1.663273 |
| 65 | 1 | 0 | 6.875048  | -2.266834 | -0.731183 |
| 66 | 1 | 0 | 6.309224  | -0.927279 | 0.401251  |
| 67 | 1 | 0 | 5.388447  | -3.409080 | -2.128514 |
| 68 | 1 | 0 | 4.001762  | -3.870187 | -1.144408 |
| 69 | 1 | 0 | 3.794448  | -2.723380 | -2.456363 |
| 70 | 1 | 0 | 5.195836  | 1.845698  | -1.532203 |
| 71 | 1 | 0 | 5.471715  | 1.194490  | 0.057666  |
| 72 | 1 | 0 | 3.020361  | 1.514847  | 0.610434  |
| 73 | 1 | 0 | 2.768421  | 2.213744  | -0.965804 |
| 74 | 8 | 0 | 2.509486  | -3.862707 | 1.898645  |
| 75 | 1 | 0 | 3.554522  | -2.206765 | 2.330193  |
| 76 | 6 | 0 | 1.217970  | -0.407794 | 2.855055  |
| 77 | 1 | 0 | 1.050486  | 0.505761  | 3.425857  |
| 78 | 1 | 0 | 0.344707  | -1.055650 | 2.953168  |
| 79 | 1 | 0 | 2.088908  | -0.921592 | 3.274710  |
| 80 | 6 | 0 | -4.866743 | -2.639520 | 0.032592  |
| 81 | 1 | 0 | -5.872846 | -2.335803 | 0.328781  |
| 82 | 1 | 0 | -4.946145 | -3.106205 | -0.952446 |
| 83 | 1 | 0 | -4.550783 | -3.405356 | 0.741004  |
| 84 | 1 | 0 | 7.807470  | 4.794147  | 0.809289  |
| 85 | 1 | 0 | 6.440751  | 5.547016  | -0.068017 |
| 86 | 1 | 0 | 6.230116  | 5.037936  | 1.619631  |

---

| Center<br>Number | Atomic<br>Number | Atomic<br>Type | Coordinates (Angstroms) |           |           |
|------------------|------------------|----------------|-------------------------|-----------|-----------|
|                  |                  |                | X                       | Y         | Z         |
| 1                | 6                | 0              | -0.902836               | 0.191249  | -1.148367 |
| 2                | 6                | 0              | 0.479725                | 0.862051  | -1.033472 |
| 3                | 1                | 0              | -0.911433               | -0.363153 | -2.087529 |
| 4                | 1                | 0              | -1.666756               | 0.968000  | -1.237511 |
| 5                | 1                | 0              | 0.509075                | 1.566162  | -0.200992 |
| 6                | 1                | 0              | 0.663620                | 1.438780  | -1.945227 |
| 7                | 6                | 0              | 3.736081                | -1.044979 | -0.120664 |
| 8                | 6                | 0              | 2.576355                | -1.956549 | 0.372578  |
| 9                | 6                | 0              | 1.350663                | -0.989332 | 0.457459  |
| 10               | 6                | 0              | 1.545651                | -0.214925 | -0.861995 |
| 11               | 6                | 0              | 2.976002                | -2.729302 | 1.608875  |
| 12               | 1                | 0              | 2.313233                | -2.702581 | -0.378558 |
| 13               | 8                | 0              | 1.497676                | -0.023184 | 1.515608  |
| 14               | 6                | 0              | -1.859206               | -3.052360 | 0.668648  |
| 15               | 6                | 0              | -2.331067               | -1.908521 | -0.282076 |
| 16               | 6                | 0              | -1.251247               | -0.752731 | 0.036179  |
| 17               | 6                | 0              | -0.030257               | -1.599629 | 0.457739  |
| 18               | 6                | 0              | -0.383240               | -2.830721 | 0.814250  |
| 19               | 1                | 0              | -2.350148               | -2.989588 | 1.648665  |
| 20               | 1                | 0              | -2.098470               | -4.042325 | 0.271320  |
| 21               | 6                | 0              | -2.179673               | -2.432511 | -1.724420 |
| 22               | 6                | 0              | -1.687773               | 0.121206  | 1.236137  |
| 23               | 1                | 0              | 0.293673                | -3.591627 | 1.181833  |
| 24               | 1                | 0              | -2.482024               | -1.704348 | -2.477534 |
| 25               | 1                | 0              | -1.145847               | -2.715145 | -1.931071 |
| 26               | 1                | 0              | -2.791938               | -3.324406 | -1.868537 |
| 27               | 1                | 0              | -0.886355               | 0.804816  | 1.513072  |
| 28               | 1                | 0              | -2.569059               | 0.719844  | 1.002564  |
| 29               | 1                | 0              | -1.918742               | -0.483703 | 2.115141  |
| 30               | 6                | 0              | -3.820794               | -1.530965 | 0.005381  |
| 31               | 6                | 0              | -4.374953               | -0.450032 | -0.948835 |
| 32               | 6                | 0              | -5.625984               | 0.263670  | -0.462894 |
| 33               | 6                | 0              | -6.210160               | 1.287234  | -1.447895 |
| 34               | 6                | 0              | -6.802393               | 2.369255  | -0.536763 |
| 35               | 6                | 0              | -5.975505               | 2.225223  | 0.738889  |
| 36               | 8                | 0              | -5.310243               | 1.039812  | 0.729183  |
| 37               | 1                | 0              | -6.392097               | -0.456863 | -0.164411 |
| 38               | 1                | 0              | -6.944073               | 0.833125  | -2.115269 |
| 39               | 1                | 0              | -5.408013               | 1.701782  | -2.063847 |
| 40               | 1                | 0              | -6.638668               | 3.374586  | -0.927163 |
| 41               | 6                | 0              | -8.295653               | 2.195891  | -0.222634 |
| 42               | 1                | 0              | -3.853593               | -1.119959 | 1.016186  |
| 43               | 1                | 0              | -4.616846               | -0.900704 | -1.917966 |
| 44               | 1                | 0              | -3.624518               | 0.317248  | -1.145516 |
| 45               | 8                | 0              | -5.894968               | 2.996693  | 1.652362  |
| 46               | 1                | 0              | -8.617581               | 2.926024  | 0.521017  |
| 47               | 1                | 0              | -8.890367               | 2.338979  | -1.127089 |
| 48               | 1                | 0              | -8.510618               | 1.198205  | 0.168507  |
| 49               | 1                | 0              | 1.351183                | -0.962718 | -1.640756 |
| 50               | 6                | 0              | 3.062930                | 0.118290  | -0.986052 |
| 51               | 6                | 0              | 3.468525                | 0.129184  | -2.469225 |

|    |   |   |           |           |           |
|----|---|---|-----------|-----------|-----------|
| 52 | 6 | 0 | 3.385389  | 1.505012  | -0.369501 |
| 53 | 1 | 0 | 4.551200  | 0.155777  | -2.597991 |
| 54 | 1 | 0 | 3.093740  | -0.745373 | -3.002219 |
| 55 | 1 | 0 | 3.053544  | 1.011350  | -2.964931 |
| 56 | 6 | 0 | 4.855862  | 1.957544  | -0.479061 |
| 57 | 6 | 0 | 5.065992  | 3.243378  | 0.282509  |
| 58 | 8 | 0 | 5.427261  | 3.321705  | 1.431302  |
| 59 | 8 | 0 | 4.768236  | 4.324621  | -0.473269 |
| 60 | 6 | 0 | 4.890199  | 5.597272  | 0.185884  |
| 61 | 6 | 0 | 4.884451  | -1.836299 | -0.730122 |
| 62 | 1 | 0 | 4.141998  | -0.556770 | 0.768337  |
| 63 | 6 | 0 | 6.140787  | -1.612607 | -0.343268 |
| 64 | 6 | 0 | 4.582284  | -2.936556 | -1.720164 |
| 65 | 1 | 0 | 6.969898  | -2.174575 | -0.758110 |
| 66 | 1 | 0 | 6.387206  | -0.870193 | 0.407038  |
| 67 | 1 | 0 | 5.498424  | -3.293303 | -2.191985 |
| 68 | 1 | 0 | 4.114218  | -3.791845 | -1.223098 |
| 69 | 1 | 0 | 3.898502  | -2.615935 | -2.507509 |
| 70 | 1 | 0 | 5.137992  | 2.111533  | -1.520931 |
| 71 | 1 | 0 | 5.524822  | 1.218001  | -0.042387 |
| 72 | 1 | 0 | 3.093226  | 1.499574  | 0.680196  |
| 73 | 1 | 0 | 2.766740  | 2.256532  | -0.867472 |
| 74 | 8 | 0 | 2.631875  | -3.861468 | 1.851205  |
| 75 | 1 | 0 | 3.666798  | -2.203092 | 2.298808  |
| 76 | 6 | 0 | 1.294102  | -0.451485 | 2.855305  |
| 77 | 1 | 0 | 0.436265  | -1.120510 | 2.947974  |
| 78 | 1 | 0 | 2.179850  | -0.950874 | 3.260334  |
| 79 | 1 | 0 | 1.110563  | 0.448671  | 3.442035  |
| 80 | 6 | 0 | -4.753351 | -2.757084 | 0.000027  |
| 81 | 1 | 0 | -5.768262 | -2.473635 | 0.286714  |
| 82 | 1 | 0 | -4.813975 | -3.221304 | -0.987429 |
| 83 | 1 | 0 | -4.430112 | -3.519260 | 0.709128  |
| 84 | 1 | 0 | 4.615406  | 6.339308  | -0.559544 |
| 85 | 1 | 0 | 4.219944  | 5.647459  | 1.043721  |
| 86 | 1 | 0 | 5.914245  | 5.753348  | 0.524144  |

---

| Center<br>Number | Atomic<br>Number | Atomic<br>Type | Coordinates (Angstroms) |           |           |
|------------------|------------------|----------------|-------------------------|-----------|-----------|
|                  |                  |                | X                       | Y         | Z         |
| 1                | 6                | 0              | -0.801400               | 0.042420  | -1.213640 |
| 2                | 6                | 0              | 0.576370                | 0.734840  | -1.203740 |
| 3                | 1                | 0              | -0.842870               | -0.561710 | -2.120590 |
| 4                | 1                | 0              | -1.579320               | 0.804120  | -1.310590 |
| 5                | 1                | 0              | 0.627190                | 1.503870  | -0.432320 |
| 6                | 1                | 0              | 0.716060                | 1.238740  | -2.164320 |
| 7                | 6                | 0              | 3.887610                | -0.930970 | -0.163510 |
| 8                | 6                | 0              | 2.798980                | -1.896110 | 0.360300  |
| 9                | 6                | 0              | 1.525570                | -0.986320 | 0.391870  |
| 10               | 6                | 0              | 1.654450                | -0.322610 | -0.993080 |
| 11               | 6                | 0              | 3.227440                | -2.588610 | 1.635880  |
| 12               | 1                | 0              | 2.581230                | -2.687800 | -0.359660 |
| 13               | 8                | 0              | 1.654620                | 0.067620  | 1.367230  |
| 14               | 6                | 0              | -1.621260               | -3.111690 | 0.821330  |
| 15               | 6                | 0              | -2.144450               | -2.042310 | -0.186720 |
| 16               | 6                | 0              | -1.088780               | -0.841650 | 0.034080  |
| 17               | 6                | 0              | 0.164620                | -1.632500 | 0.474940  |
| 18               | 6                | 0              | -0.148360               | -2.846870 | 0.915880  |
| 19               | 1                | 0              | -2.090360               | -2.999940 | 1.807660  |
| 20               | 1                | 0              | -1.844420               | -4.129880 | 0.491680  |
| 21               | 6                | 0              | -2.008790               | -2.651750 | -1.596800 |
| 22               | 6                | 0              | -1.521390               | 0.088750  | 1.192160  |
| 23               | 1                | 0              | 0.557060                | -3.565460 | 1.313080  |
| 24               | 1                | 0              | -2.349540               | -1.981610 | -2.386350 |
| 25               | 1                | 0              | -0.971160               | -2.915000 | -1.809640 |
| 26               | 1                | 0              | -2.595720               | -3.569020 | -1.670740 |
| 27               | 1                | 0              | -0.741960               | 0.821710  | 1.397060  |
| 28               | 1                | 0              | -2.434810               | 0.634270  | 0.953000  |
| 29               | 1                | 0              | -1.697240               | -0.468890 | 2.114190  |
| 30               | 6                | 0              | -3.637590               | -1.685830 | 0.110720  |
| 31               | 6                | 0              | -4.241290               | -0.685170 | -0.899050 |
| 32               | 6                | 0              | -5.505170               | 0.021050  | -0.436480 |
| 33               | 6                | 0              | -6.131020               | 0.967920  | -1.471350 |
| 34               | 6                | 0              | -6.741090               | 2.085840  | -0.617070 |
| 35               | 6                | 0              | -5.895540               | 2.039320  | 0.653550  |
| 36               | 8                | 0              | -5.196030               | 0.875030  | 0.703250  |
| 37               | 1                | 0              | -6.246420               | -0.701420 | -0.084600 |
| 38               | 1                | 0              | -6.861010               | 0.455170  | -2.099380 |
| 39               | 1                | 0              | -5.349340               | 1.366610  | -2.123000 |
| 40               | 1                | 0              | -6.609080               | 3.070340  | -1.067930 |
| 41               | 6                | 0              | -8.225470               | 1.892470  | -0.273730 |
| 42               | 1                | 0              | -3.659950               | -1.209400 | 1.092800  |
| 43               | 1                | 0              | -4.485410               | -1.203790 | -1.832970 |
| 44               | 1                | 0              | -3.517420               | 0.089140  | -1.157520 |
| 45               | 8                | 0              | -5.826830               | 2.864290  | 1.520140  |
| 46               | 1                | 0              | -8.557790               | 2.655240  | 0.431600  |
| 47               | 1                | 0              | -8.834270               | 1.968540  | -1.176940 |
| 48               | 1                | 0              | -8.409530               | 0.913380  | 0.175820  |
| 49               | 1                | 0              | 1.403010                | -1.133940 | -1.685430 |
| 50               | 6                | 0              | 3.172550                | -0.029690 | -1.259540 |
| 51               | 6                | 0              | 3.486050                | -0.514140 | -2.689140 |

|    |   |   |           |           |           |
|----|---|---|-----------|-----------|-----------|
| 52 | 6 | 0 | 3.570240  | 1.467920  | -1.216400 |
| 53 | 1 | 0 | 4.528410  | -0.342950 | -2.963840 |
| 54 | 1 | 0 | 3.285630  | -1.580630 | -2.806250 |
| 55 | 1 | 0 | 2.863670  | 0.025100  | -3.409110 |
| 56 | 6 | 0 | 3.551990  | 2.207710  | 0.121100  |
| 57 | 6 | 0 | 3.729250  | 3.699900  | -0.045130 |
| 58 | 8 | 0 | 3.637050  | 4.318300  | -1.077010 |
| 59 | 8 | 0 | 3.991840  | 4.287980  | 1.144230  |
| 60 | 6 | 0 | 4.131220  | 5.719030  | 1.114870  |
| 61 | 6 | 0 | 5.198660  | -1.581540 | -0.560850 |
| 62 | 1 | 0 | 4.119240  | -0.271140 | 0.678380  |
| 63 | 6 | 0 | 5.328860  | -2.880390 | -0.831150 |
| 64 | 6 | 0 | 6.399600  | -0.669060 | -0.595700 |
| 65 | 1 | 0 | 6.293070  | -3.298510 | -1.096490 |
| 66 | 1 | 0 | 4.501050  | -3.576820 | -0.798770 |
| 67 | 1 | 0 | 7.304970  | -1.212720 | -0.867410 |
| 68 | 1 | 0 | 6.268230  | 0.147140  | -1.311050 |
| 69 | 1 | 0 | 6.561450  | -0.203580 | 0.382250  |
| 70 | 1 | 0 | 4.332670  | 1.859650  | 0.801020  |
| 71 | 1 | 0 | 2.614480  | 2.048870  | 0.657550  |
| 72 | 1 | 0 | 2.921010  | 2.006180  | -1.910110 |
| 73 | 1 | 0 | 4.572230  | 1.567710  | -1.642970 |
| 74 | 8 | 0 | 2.845140  | -3.677400 | 1.990960  |
| 75 | 1 | 0 | 3.970820  | -2.039170 | 2.249990  |
| 76 | 6 | 0 | 1.533400  | -0.274730 | 2.740960  |
| 77 | 1 | 0 | 0.728090  | -0.991030 | 2.915930  |
| 78 | 1 | 0 | 2.466920  | -0.685270 | 3.139660  |
| 79 | 1 | 0 | 1.310200  | 0.650040  | 3.273540  |
| 80 | 6 | 0 | -4.535750 | -2.933340 | 0.209290  |
| 81 | 1 | 0 | -5.551050 | -2.657590 | 0.502120  |
| 82 | 1 | 0 | -4.607280 | -3.463910 | -0.743510 |
| 83 | 1 | 0 | -4.175870 | -3.638170 | 0.958990  |
| 84 | 1 | 0 | 4.335540  | 6.012580  | 2.141440  |
| 85 | 1 | 0 | 4.953950  | 6.008710  | 0.461600  |
| 86 | 1 | 0 | 3.212330  | 6.184350  | 0.758700  |

---



| Center<br>Number | Atomic<br>Number | Atomic<br>Type | Coordinates (Angstroms) |           |           |
|------------------|------------------|----------------|-------------------------|-----------|-----------|
|                  |                  |                | X                       | Y         | Z         |
| 1                | 6                | 0              | -1.033548               | 0.162012  | -1.105223 |
| 2                | 6                | 0              | 0.345559                | 0.839687  | -0.987782 |
| 3                | 1                | 0              | -1.050885               | -0.363228 | -2.060693 |
| 4                | 1                | 0              | -1.804713               | 0.934920  | -1.160910 |
| 5                | 1                | 0              | 0.379866                | 1.518508  | -0.134773 |
| 6                | 1                | 0              | 0.513384                | 1.444725  | -1.884075 |
| 7                | 6                | 0              | 3.627110                | -1.067123 | -0.168395 |
| 8                | 6                | 0              | 2.480317                | -2.001532 | 0.311437  |
| 9                | 6                | 0              | 1.247792                | -1.047948 | 0.436353  |
| 10               | 6                | 0              | 1.421837                | -0.233647 | -0.861640 |
| 11               | 6                | 0              | 2.899172                | -2.805465 | 1.521292  |
| 12               | 1                | 0              | 2.215062                | -2.727990 | -0.457845 |
| 13               | 8                | 0              | 1.395960                | -0.111381 | 1.520737  |
| 14               | 6                | 0              | -1.940742               | -3.146778 | 0.614662  |
| 15               | 6                | 0              | -2.435984               | -1.974190 | -0.288387 |
| 16               | 6                | 0              | -1.360128               | -0.821036 | 0.053335  |
| 17               | 6                | 0              | -0.127481               | -1.670593 | 0.432331  |
| 18               | 6                | 0              | -0.465540               | -2.916142 | 0.750678  |
| 19               | 1                | 0              | -2.420121               | -3.125376 | 1.601983  |
| 20               | 1                | 0              | -2.174730               | -4.124083 | 0.184226  |
| 21               | 6                | 0              | -2.302553               | -2.448163 | -1.749667 |
| 22               | 6                | 0              | -1.786898               | 0.010355  | 1.286285  |
| 23               | 1                | 0              | 0.222733                | -3.682434 | 1.084555  |
| 24               | 1                | 0              | -2.616209               | -1.695627 | -2.473566 |
| 25               | 1                | 0              | -1.271181               | -2.721887 | -1.979695 |
| 26               | 1                | 0              | -2.915542               | -3.335803 | -1.915106 |
| 27               | 1                | 0              | -0.987620               | 0.691273  | 1.574864  |
| 28               | 1                | 0              | -2.675179               | 0.610060  | 1.083661  |
| 29               | 1                | 0              | -2.004129               | -0.623044 | 2.148346  |
| 30               | 6                | 0              | -3.924715               | -1.620145 | 0.034547  |
| 31               | 6                | 0              | -4.503186               | -0.510084 | -0.870370 |
| 32               | 6                | 0              | -5.788611               | 0.136787  | -0.359600 |
| 33               | 6                | 0              | -6.319776               | 1.277755  | -1.247412 |
| 34               | 6                | 0              | -5.750781               | 2.543371  | -0.598454 |
| 35               | 6                | 0              | -5.525857               | 2.112893  | 0.848344  |
| 36               | 8                | 0              | -5.556891               | 0.757944  | 0.938269  |
| 37               | 1                | 0              | -6.554329               | -0.617935 | -0.184808 |
| 38               | 1                | 0              | -7.411823               | 1.303338  | -1.211896 |
| 39               | 1                | 0              | -6.023542               | 1.154566  | -2.289443 |
| 40               | 1                | 0              | -4.750972               | 2.751148  | -0.997972 |
| 41               | 6                | 0              | -6.597421               | 3.806579  | -0.716227 |
| 42               | 1                | 0              | -3.947205               | -1.247110 | 1.059961  |
| 43               | 1                | 0              | -4.725598               | -0.921300 | -1.860986 |
| 44               | 1                | 0              | -3.766340               | 0.280523  | -1.026430 |
| 45               | 8                | 0              | -5.332102               | 2.812973  | 1.801662  |
| 46               | 1                | 0              | -6.154391               | 4.618063  | -0.137997 |
| 47               | 1                | 0              | -6.675186               | 4.124571  | -1.758021 |
| 48               | 1                | 0              | -7.607532               | 3.635399  | -0.336558 |
| 49               | 1                | 0              | 1.223823                | -0.959485 | -1.660018 |
| 50               | 6                | 0              | 2.935279                | 0.114962  | -0.992965 |
| 51               | 6                | 0              | 3.324003                | 0.169874  | -2.479724 |

|    |   |   |           |           |           |
|----|---|---|-----------|-----------|-----------|
| 52 | 6 | 0 | 3.253842  | 1.485684  | -0.340391 |
| 53 | 1 | 0 | 4.404898  | 0.207883  | -2.620329 |
| 54 | 1 | 0 | 2.949077  | -0.692607 | -3.031905 |
| 55 | 1 | 0 | 2.897496  | 1.062264  | -2.946570 |
| 56 | 6 | 0 | 4.719014  | 1.953751  | -0.454369 |
| 57 | 6 | 0 | 4.928343  | 3.217708  | 0.343172  |
| 58 | 8 | 0 | 5.292183  | 3.263481  | 1.492887  |
| 59 | 8 | 0 | 4.626789  | 4.319674  | -0.380448 |
| 60 | 6 | 0 | 4.749324  | 5.573125  | 0.314530  |
| 61 | 6 | 0 | 4.774474  | -1.832013 | -0.812738 |
| 62 | 1 | 0 | 4.039890  | -0.600806 | 0.729249  |
| 63 | 6 | 0 | 6.033534  | -1.608048 | -0.435024 |
| 64 | 6 | 0 | 4.469655  | -2.909198 | -1.827182 |
| 65 | 1 | 0 | 6.862046  | -2.152252 | -0.874028 |
| 66 | 1 | 0 | 6.283073  | -0.883504 | 0.331542  |
| 67 | 1 | 0 | 5.383821  | -3.249374 | -2.314769 |
| 68 | 1 | 0 | 4.010032  | -3.778887 | -1.347539 |
| 69 | 1 | 0 | 3.777964  | -2.573634 | -2.601387 |
| 70 | 1 | 0 | 4.986835  | 2.140941  | -1.494491 |
| 71 | 1 | 0 | 5.399087  | 1.206963  | -0.048183 |
| 72 | 1 | 0 | 2.974503  | 1.446702  | 0.712094  |
| 73 | 1 | 0 | 2.622832  | 2.246159  | -0.808470 |
| 74 | 8 | 0 | 2.565459  | -3.946284 | 1.735657  |
| 75 | 1 | 0 | 3.593727  | -2.293513 | 2.218102  |
| 76 | 6 | 0 | 1.218177  | -0.583199 | 2.849819  |
| 77 | 1 | 0 | 0.388830  | -1.289012 | 2.928623  |
| 78 | 1 | 0 | 2.126674  | -1.056593 | 3.235145  |
| 79 | 1 | 0 | 1.002080  | 0.291954  | 3.462761  |
| 80 | 6 | 0 | -4.846913 | -2.853869 | -0.002475 |
| 81 | 1 | 0 | -5.853220 | -2.596409 | 0.333634  |
| 82 | 1 | 0 | -4.936545 | -3.268749 | -1.009605 |
| 83 | 1 | 0 | -4.493060 | -3.647266 | 0.655748  |
| 84 | 1 | 0 | 4.473181  | 6.335959  | -0.409085 |
| 85 | 1 | 0 | 4.080353  | 5.598659  | 1.174456  |
| 86 | 1 | 0 | 5.773833  | 5.719839  | 0.655534  |

---

| Center<br>Number | Atomic<br>Number | Atomic<br>Type | Coordinates (Angstroms) |           |           |
|------------------|------------------|----------------|-------------------------|-----------|-----------|
|                  |                  |                | X                       | Y         | Z         |
| 1                | 6                | 0              | -0.943782               | 0.160880  | -1.177805 |
| 2                | 6                | 0              | 0.442276                | 0.832597  | -1.131258 |
| 3                | 1                | 0              | -0.971883               | -0.448747 | -2.081825 |
| 4                | 1                | 0              | -1.707839               | 0.933168  | -1.298672 |
| 5                | 1                | 0              | 0.491113                | 1.584905  | -0.343294 |
| 6                | 1                | 0              | 0.609251                | 1.352886  | -2.079214 |
| 7                | 6                | 0              | 3.711048                | -1.028479 | -0.172101 |
| 8                | 6                | 0              | 2.559909                | -1.901405 | 0.403843  |
| 9                | 6                | 0              | 1.338976                | -0.925842 | 0.453859  |
| 10               | 6                | 0              | 1.507055                | -0.237694 | -0.915968 |
| 11               | 6                | 0              | 2.983867                | -2.595768 | 1.677553  |
| 12               | 1                | 0              | 2.276430                | -2.692767 | -0.291445 |
| 13               | 8                | 0              | 1.510751                | 0.103236  | 1.448137  |
| 14               | 6                | 0              | -1.868919               | -2.963195 | 0.854050  |
| 15               | 6                | 0              | -2.356157               | -1.881181 | -0.158726 |
| 16               | 6                | 0              | -1.270924               | -0.709075 | 0.068442  |
| 17               | 6                | 0              | -0.042742               | -1.530238 | 0.520214  |
| 18               | 6                | 0              | -0.390524               | -2.736133 | 0.958938  |
| 19               | 1                | 0              | -2.342077               | -2.837707 | 1.836714  |
| 20               | 1                | 0              | -2.116268               | -3.975547 | 0.523827  |
| 21               | 6                | 0              | -2.226268               | -2.494700 | -1.567583 |
| 22               | 6                | 0              | -1.685892               | 0.236582  | 1.220657  |
| 23               | 1                | 0              | 0.291630                | -3.474898 | 1.360425  |
| 24               | 1                | 0              | -2.541389               | -1.814931 | -2.359572 |
| 25               | 1                | 0              | -1.194781               | -2.787210 | -1.772135 |
| 26               | 1                | 0              | -2.838178               | -3.395067 | -1.646841 |
| 27               | 1                | 0              | -0.883785               | 0.941475  | 1.436801  |
| 28               | 1                | 0              | -2.576234               | 0.814360  | 0.969836  |
| 29               | 1                | 0              | -1.893955               | -0.314170 | 2.140044  |
| 30               | 6                | 0              | -3.841130               | -1.484935 | 0.127999  |
| 31               | 6                | 0              | -4.411014               | -0.469638 | -0.886516 |
| 32               | 6                | 0              | -5.669778               | 0.256184  | -0.440832 |
| 33               | 6                | 0              | -6.261292               | 1.220728  | -1.479413 |
| 34               | 6                | 0              | -6.871134               | 2.339852  | -0.626634 |
| 35               | 6                | 0              | -6.047845               | 2.271715  | 0.657692  |
| 36               | 8                | 0              | -5.365833               | 1.096876  | 0.709865  |
| 37               | 1                | 0              | -6.429854               | -0.455376 | -0.107543 |
| 38               | 1                | 0              | -6.986441               | 0.724145  | -2.125785 |
| 39               | 1                | 0              | -5.461322               | 1.613385  | -2.112308 |
| 40               | 1                | 0              | -6.718750               | 3.326118  | -1.067032 |
| 41               | 6                | 0              | -8.363446               | 2.162797  | -0.310045 |
| 42               | 1                | 0              | -3.857138               | -1.006530 | 1.109298  |
| 43               | 1                | 0              | -4.649510               | -0.979399 | -1.826731 |
| 44               | 1                | 0              | -3.669482               | 0.293015  | -1.129448 |
| 45               | 8                | 0              | -5.982086               | 3.088814  | 1.531790  |
| 46               | 1                | 0              | -8.698248               | 2.924539  | 0.395207  |
| 47               | 1                | 0              | -8.955642               | 2.253085  | -1.222920 |
| 48               | 1                | 0              | -8.567342               | 1.182870  | 0.128996  |
| 49               | 1                | 0              | 1.290361                | -1.032462 | -1.640302 |
| 50               | 6                | 0              | 3.022248                | 0.076799  | -1.098502 |
| 51               | 6                | 0              | 3.389554                | -0.018858 | -2.588708 |

|    |   |   |           |           |           |
|----|---|---|-----------|-----------|-----------|
| 52 | 6 | 0 | 3.363401  | 1.503119  | -0.592342 |
| 53 | 1 | 0 | 4.468336  | -0.007157 | -2.748052 |
| 54 | 1 | 0 | 2.998017  | -0.926992 | -3.048465 |
| 55 | 1 | 0 | 2.964852  | 0.828513  | -3.133979 |
| 56 | 6 | 0 | 4.835641  | 1.933475  | -0.744884 |
| 57 | 6 | 0 | 5.007586  | 3.358084  | -0.275391 |
| 58 | 8 | 0 | 4.658667  | 4.335613  | -0.891203 |
| 59 | 8 | 0 | 5.582243  | 3.421679  | 0.946658  |
| 60 | 6 | 0 | 5.746048  | 4.744828  | 1.487800  |
| 61 | 6 | 0 | 4.846172  | -1.860233 | -0.751590 |
| 62 | 1 | 0 | 4.135735  | -0.484137 | 0.674520  |
| 63 | 6 | 0 | 6.110927  | -1.606705 | -0.413594 |
| 64 | 6 | 0 | 4.525179  | -3.027078 | -1.655306 |
| 65 | 1 | 0 | 6.932039  | -2.193869 | -0.808893 |
| 66 | 1 | 0 | 6.372439  | -0.811003 | 0.274259  |
| 67 | 1 | 0 | 5.431821  | -3.414557 | -2.121175 |
| 68 | 1 | 0 | 4.070456  | -3.846480 | -1.090137 |
| 69 | 1 | 0 | 3.823681  | -2.762887 | -2.447978 |
| 70 | 1 | 0 | 5.136109  | 1.907678  | -1.792862 |
| 71 | 1 | 0 | 5.499626  | 1.283183  | -0.178003 |
| 72 | 1 | 0 | 3.073238  | 1.584830  | 0.455449  |
| 73 | 1 | 0 | 2.753798  | 2.220885  | -1.146894 |
| 74 | 8 | 0 | 2.648059  | -3.711470 | 1.995865  |
| 75 | 1 | 0 | 3.685184  | -2.027031 | 2.321825  |
| 76 | 6 | 0 | 1.330031  | -0.242210 | 2.814435  |
| 77 | 1 | 0 | 1.145164  | 0.690662  | 3.347504  |
| 78 | 1 | 0 | 0.480166  | -0.911583 | 2.961489  |
| 79 | 1 | 0 | 2.226133  | -0.708444 | 3.236397  |
| 80 | 6 | 0 | -4.771856 | -2.708883 | 0.221679  |
| 81 | 1 | 0 | -5.780092 | -2.408059 | 0.513697  |
| 82 | 1 | 0 | -4.855146 | -3.235143 | -0.732585 |
| 83 | 1 | 0 | -4.431588 | -3.424803 | 0.969959  |
| 84 | 1 | 0 | 6.215762  | 4.606574  | 2.458343  |
| 85 | 1 | 0 | 6.379496  | 5.345957  | 0.836034  |
| 86 | 1 | 0 | 4.778397  | 5.234426  | 1.594781  |

---

| Center<br>Number | Atomic<br>Number | Atomic<br>Type | Coordinates (Angstroms) |           |           |
|------------------|------------------|----------------|-------------------------|-----------|-----------|
|                  |                  |                | X                       | Y         | Z         |
| 1                | 6                | 0              | -0.916276               | 0.513081  | -0.739347 |
| 2                | 6                | 0              | 0.422784                | 1.070123  | -0.220523 |
| 3                | 1                | 0              | -0.807738               | 0.384898  | -1.816821 |
| 4                | 1                | 0              | -1.692304               | 1.269527  | -0.594144 |
| 5                | 1                | 0              | 0.341962                | 1.394303  | 0.818388  |
| 6                | 1                | 0              | 0.667229                | 1.952094  | -0.817419 |
| 7                | 6                | 0              | 3.608916                | -1.065194 | 0.310012  |
| 8                | 6                | 0              | 2.462888                | -2.090753 | 0.176212  |
| 9                | 6                | 0              | 1.193314                | -1.233819 | 0.490863  |
| 10               | 6                | 0              | 1.507976                | 0.007319  | -0.369739 |
| 11               | 6                | 0              | 2.734728                | -3.331111 | 1.000812  |
| 12               | 1                | 0              | 2.337634                | -2.430811 | -0.853396 |
| 13               | 8                | 0              | 1.184001                | -0.772576 | 1.858185  |
| 14               | 6                | 0              | -1.945556               | -3.173077 | -0.507973 |
| 15               | 6                | 0              | -2.357748               | -1.736594 | -0.955740 |
| 16               | 6                | 0              | -1.356083               | -0.823147 | -0.082287 |
| 17               | 6                | 0              | -0.155644               | -1.780269 | 0.090325  |
| 18               | 6                | 0              | -0.501069               | -3.045875 | -0.126107 |
| 19               | 1                | 0              | -2.535244               | -3.512342 | 0.353652  |
| 20               | 1                | 0              | -2.107385               | -3.911857 | -1.297409 |
| 21               | 6                | 0              | -2.041426               | -1.629695 | -2.461186 |
| 22               | 6                | 0              | -1.942638               | -0.509304 | 1.314722  |
| 23               | 1                | 0              | 0.160064                | -3.897217 | -0.028792 |
| 24               | 1                | 0              | -2.284884               | -0.653364 | -2.880351 |
| 25               | 1                | 0              | -0.983718               | -1.819729 | -2.652315 |
| 26               | 1                | 0              | -2.608476               | -2.376135 | -3.020158 |
| 27               | 1                | 0              | -1.200260               | -0.002629 | 1.929717  |
| 28               | 1                | 0              | -2.818114               | 0.137866  | 1.251245  |
| 29               | 1                | 0              | -2.239640               | -1.417823 | 1.841860  |
| 30               | 6                | 0              | -3.881655               | -1.493421 | -0.699891 |
| 31               | 6                | 0              | -4.372355               | -0.110729 | -1.180651 |
| 32               | 6                | 0              | -5.729278               | 0.321864  | -0.629773 |
| 33               | 6                | 0              | -6.168288               | 1.731548  | -1.068762 |
| 34               | 6                | 0              | -5.723459               | 2.631905  | 0.088140  |
| 35               | 6                | 0              | -5.676106               | 1.669141  | 1.271363  |
| 36               | 8                | 0              | -5.683342               | 0.386274  | 0.825262  |
| 37               | 1                | 0              | -6.492331               | -0.419861 | -0.861942 |
| 38               | 1                | 0              | -7.255636               | 1.771080  | -1.171380 |
| 39               | 1                | 0              | -5.732738               | 2.012257  | -2.028005 |
| 40               | 1                | 0              | -4.686564               | 2.953568  | -0.065863 |
| 41               | 6                | 0              | -6.582514               | 3.862553  | 0.359885  |
| 42               | 1                | 0              | -4.031080               | -1.532894 | 0.380551  |
| 43               | 1                | 0              | -4.457247               | -0.108064 | -2.272687 |
| 44               | 1                | 0              | -3.643974               | 0.662760  | -0.928544 |
| 45               | 8                | 0              | -5.625823               | 1.940299  | 2.437846  |
| 46               | 1                | 0              | -6.238647               | 4.376919  | 1.257760  |
| 47               | 1                | 0              | -6.535868               | 4.559703  | -0.479328 |
| 48               | 1                | 0              | -7.627541               | 3.582348  | 0.511889  |
| 49               | 1                | 0              | 1.428417                | -0.358390 | -1.400398 |
| 50               | 6                | 0              | 3.025479                | 0.339086  | -0.177414 |
| 51               | 6                | 0              | 3.600712                | 0.777356  | -1.532694 |

|    |   |   |           |           |           |
|----|---|---|-----------|-----------|-----------|
| 52 | 6 | 0 | 3.329406  | 1.386499  | 0.931198  |
| 53 | 1 | 0 | 4.656457  | 1.045072  | -1.469590 |
| 54 | 1 | 0 | 3.511674  | -0.020839 | -2.271518 |
| 55 | 1 | 0 | 3.061744  | 1.645527  | -1.918524 |
| 56 | 6 | 0 | 3.110310  | 2.881398  | 0.626089  |
| 57 | 6 | 0 | 4.136489  | 3.576051  | -0.242296 |
| 58 | 8 | 0 | 3.878511  | 4.340562  | -1.139553 |
| 59 | 8 | 0 | 5.403204  | 3.289696  | 0.135820  |
| 60 | 6 | 0 | 6.438680  | 3.962978  | -0.601701 |
| 61 | 6 | 0 | 4.939803  | -1.498621 | -0.277201 |
| 62 | 1 | 0 | 3.777631  | -0.952581 | 1.387153  |
| 63 | 6 | 0 | 5.064148  | -2.448027 | -1.204616 |
| 64 | 6 | 0 | 6.162354  | -0.817585 | 0.287302  |
| 65 | 1 | 0 | 6.039884  | -2.731039 | -1.582518 |
| 66 | 1 | 0 | 4.219750  | -2.981918 | -1.620564 |
| 67 | 1 | 0 | 6.232633  | -0.985895 | 1.367222  |
| 68 | 1 | 0 | 7.075140  | -1.193870 | -0.176083 |
| 69 | 1 | 0 | 6.130074  | 0.265468  | 0.143133  |
| 70 | 1 | 0 | 3.132873  | 3.414747  | 1.583491  |
| 71 | 1 | 0 | 2.140195  | 3.085636  | 0.181401  |
| 72 | 1 | 0 | 4.370300  | 1.268593  | 1.237941  |
| 73 | 1 | 0 | 2.724803  | 1.130518  | 1.801944  |
| 74 | 8 | 0 | 2.335191  | -4.438896 | 0.735782  |
| 75 | 1 | 0 | 3.380712  | -3.177890 | 1.890516  |
| 76 | 6 | 0 | 0.895201  | -1.717667 | 2.878774  |
| 77 | 1 | 0 | 0.094619  | -2.402528 | 2.591109  |
| 78 | 1 | 0 | 1.781146  | -2.301096 | 3.151311  |
| 79 | 1 | 0 | 0.578598  | -1.146547 | 3.751868  |
| 80 | 6 | 0 | -4.764888 | -2.600413 | -1.306359 |
| 81 | 1 | 0 | -5.809721 | -2.463598 | -1.021060 |
| 82 | 1 | 0 | -4.723378 | -2.605167 | -2.398559 |
| 83 | 1 | 0 | -4.473650 | -3.590700 | -0.956177 |
| 84 | 1 | 0 | 7.375033  | 3.625859  | -0.164090 |
| 85 | 1 | 0 | 6.389199  | 3.696426  | -1.657264 |
| 86 | 1 | 0 | 6.335205  | 5.043134  | -0.502611 |

---

| Center<br>Number | Atomic<br>Number | Atomic<br>Type | Coordinates (Angstroms) |           |           |
|------------------|------------------|----------------|-------------------------|-----------|-----------|
|                  |                  |                | X                       | Y         | Z         |
| 1                | 6                | 0              | -1.022009               | 0.150986  | -1.103725 |
| 2                | 6                | 0              | 0.358606                | 0.821600  | -0.971646 |
| 3                | 1                | 0              | -1.037910               | -0.361992 | -2.065847 |
| 4                | 1                | 0              | -1.789825               | 0.927728  | -1.152178 |
| 5                | 1                | 0              | 0.390692                | 1.487886  | -0.108842 |
| 6                | 1                | 0              | 0.531446                | 1.439380  | -1.858324 |
| 7                | 6                | 0              | 3.631022                | -1.117776 | -0.185594 |
| 8                | 6                | 0              | 2.479018                | -2.045202 | 0.283658  |
| 9                | 6                | 0              | 1.250096                | -1.092103 | 0.426266  |
| 10               | 6                | 0              | 1.431070                | -0.257242 | -0.856586 |
| 11               | 6                | 0              | 2.896051                | -2.882488 | 1.473791  |
| 12               | 1                | 0              | 2.198910                | -2.753289 | -0.495872 |
| 13               | 8                | 0              | 1.398229                | -0.176635 | 1.528786  |
| 14               | 6                | 0              | -1.952783               | -3.174316 | 0.568076  |
| 15               | 6                | 0              | -2.438848               | -1.985930 | -0.318851 |
| 16               | 6                | 0              | -1.355861               | -0.845233 | 0.040881  |
| 17               | 6                | 0              | -0.129039               | -1.708079 | 0.409206  |
| 18               | 6                | 0              | -0.476239               | -2.955655 | 0.709563  |
| 19               | 1                | 0              | -2.433327               | -3.163964 | 1.555010  |
| 20               | 1                | 0              | -2.192684               | -4.143863 | 0.123430  |
| 21               | 6                | 0              | -2.305848               | -2.440549 | -1.786436 |
| 22               | 6                | 0              | -1.778475               | -0.029155 | 1.285456  |
| 23               | 1                | 0              | 0.206889                | -3.729838 | 1.035102  |
| 24               | 1                | 0              | -2.611707               | -1.675591 | -2.500574 |
| 25               | 1                | 0              | -1.276099               | -2.719095 | -2.017897 |
| 26               | 1                | 0              | -2.925364               | -3.321014 | -1.965420 |
| 27               | 1                | 0              | -0.972880               | 0.638068  | 1.588035  |
| 28               | 1                | 0              | -2.660050               | 0.582924  | 1.089786  |
| 29               | 1                | 0              | -2.004763               | -0.674572 | 2.136255  |
| 30               | 6                | 0              | -3.925765               | -1.625899 | 0.005875  |
| 31               | 6                | 0              | -4.494775               | -0.501800 | -0.887600 |
| 32               | 6                | 0              | -5.777761               | 0.147673  | -0.374129 |
| 33               | 6                | 0              | -6.297104               | 1.302572  | -1.250889 |
| 34               | 6                | 0              | -5.720559               | 2.556145  | -0.585589 |
| 35               | 6                | 0              | -5.506315               | 2.107911  | 0.857423  |
| 36               | 8                | 0              | -5.547377               | 0.752298  | 0.931819  |
| 37               | 1                | 0              | -6.549364               | -0.603714 | -0.211274 |
| 38               | 1                | 0              | -7.389055               | 1.336287  | -1.218895 |
| 39               | 1                | 0              | -5.998069               | 1.188852  | -2.293197 |
| 40               | 1                | 0              | -4.716994               | 2.759348  | -0.978004 |
| 41               | 6                | 0              | -6.555378               | 3.828002  | -0.693726 |
| 42               | 1                | 0              | -3.947714               | -1.264255 | 1.035368  |
| 43               | 1                | 0              | -4.716654               | -0.900112 | -1.883596 |
| 44               | 1                | 0              | -3.752361               | 0.285740  | -1.032280 |
| 45               | 8                | 0              | -5.312681               | 2.795940  | 1.819519  |
| 46               | 1                | 0              | -6.108299               | 4.629010  | -0.104106 |
| 47               | 1                | 0              | -6.624734               | 4.158317  | -1.732287 |
| 48               | 1                | 0              | -7.568998               | 3.661659  | -0.321326 |
| 49               | 1                | 0              | 1.237980                | -0.968472 | -1.669014 |
| 50               | 6                | 0              | 2.946763                | 0.096293  | -0.973505 |
| 51               | 6                | 0              | 3.324284                | 0.152756  | -2.461629 |

|    |   |   |           |           |           |
|----|---|---|-----------|-----------|-----------|
| 52 | 6 | 0 | 3.232819  | 1.463632  | -0.299727 |
| 53 | 1 | 0 | 4.380975  | 0.369085  | -2.622986 |
| 54 | 1 | 0 | 3.109536  | -0.792001 | -2.962818 |
| 55 | 1 | 0 | 2.750272  | 0.937699  | -2.962122 |
| 56 | 6 | 0 | 4.697780  | 1.940059  | -0.286351 |
| 57 | 6 | 0 | 4.808882  | 3.262069  | 0.434979  |
| 58 | 8 | 0 | 5.048356  | 3.395350  | 1.609933  |
| 59 | 8 | 0 | 4.575953  | 4.303437  | -0.395261 |
| 60 | 6 | 0 | 4.610102  | 5.605583  | 0.215516  |
| 61 | 6 | 0 | 4.761578  | -1.862480 | -0.887262 |
| 62 | 1 | 0 | 4.066671  | -0.684798 | 0.721643  |
| 63 | 6 | 0 | 4.593527  | -3.006352 | -1.551060 |
| 64 | 6 | 0 | 6.141472  | -1.263086 | -0.773464 |
| 65 | 1 | 0 | 5.434145  | -3.499394 | -2.025317 |
| 66 | 1 | 0 | 3.636903  | -3.501476 | -1.652726 |
| 67 | 1 | 0 | 6.890846  | -1.912429 | -1.227145 |
| 68 | 1 | 0 | 6.204889  | -0.287642 | -1.261650 |
| 69 | 1 | 0 | 6.414830  | -1.108384 | 0.275392  |
| 70 | 1 | 0 | 5.081802  | 2.057939  | -1.300393 |
| 71 | 1 | 0 | 5.329255  | 1.237397  | 0.254535  |
| 72 | 1 | 0 | 2.871829  | 1.426498  | 0.727572  |
| 73 | 1 | 0 | 2.641615  | 2.223922  | -0.817387 |
| 74 | 8 | 0 | 2.482897  | -3.990234 | 1.716245  |
| 75 | 1 | 0 | 3.664878  | -2.424704 | 2.131308  |
| 76 | 6 | 0 | 1.247541  | -0.686127 | 2.846744  |
| 77 | 1 | 0 | 2.164911  | -1.168063 | 3.200381  |
| 78 | 1 | 0 | 1.041929  | 0.170611  | 3.488535  |
| 79 | 1 | 0 | 0.421832  | -1.396960 | 2.921022  |
| 80 | 6 | 0 | -4.855885 | -2.853009 | -0.047014 |
| 81 | 1 | 0 | -5.861458 | -2.592811 | 0.289228  |
| 82 | 1 | 0 | -4.945299 | -3.256441 | -1.058819 |
| 83 | 1 | 0 | -4.508500 | -3.655615 | 0.603418  |
| 84 | 1 | 0 | 4.399745  | 6.309127  | -0.586035 |
| 85 | 1 | 0 | 3.856262  | 5.677937  | 0.999100  |
| 86 | 1 | 0 | 5.592254  | 5.797035  | 0.646985  |

---



| Center<br>Number | Atomic<br>Number | Atomic<br>Type | Coordinates (Angstroms) |           |           |
|------------------|------------------|----------------|-------------------------|-----------|-----------|
|                  |                  |                | X                       | Y         | Z         |
| 1                | 6                | 0              | -1.028842               | 0.533532  | -0.832104 |
| 2                | 6                | 0              | 0.315304                | 1.114791  | -0.356523 |
| 3                | 1                | 0              | -0.926034               | 0.316202  | -1.895760 |
| 4                | 1                | 0              | -1.799728               | 1.304067  | -0.745858 |
| 5                | 1                | 0              | 0.237651                | 1.503675  | 0.659450  |
| 6                | 1                | 0              | 0.579002                | 1.959169  | -1.000195 |
| 7                | 6                | 0              | 3.512869                | -1.020162 | 0.199092  |
| 8                | 6                | 0              | 2.330494                | -2.024390 | 0.250953  |
| 9                | 6                | 0              | 1.076693                | -1.136185 | 0.523194  |
| 10               | 6                | 0              | 1.385812                | 0.030634  | -0.435419 |
| 11               | 6                | 0              | 2.626816                | -3.177469 | 1.185854  |
| 12               | 1                | 0              | 2.151399                | -2.472893 | -0.726095 |
| 13               | 8                | 0              | 1.083053                | -0.585369 | 1.855998  |
| 14               | 6                | 0              | -2.088567               | -3.115133 | -0.303156 |
| 15               | 6                | 0              | -2.493742               | -1.712606 | -0.854147 |
| 16               | 6                | 0              | -1.473669               | -0.742899 | -0.065181 |
| 17               | 6                | 0              | -0.281651               | -1.697343 | 0.173298  |
| 18               | 6                | 0              | -0.640465               | -2.972193 | 0.057277  |
| 19               | 1                | 0              | -2.673948               | -3.385207 | 0.585508  |
| 20               | 1                | 0              | -2.262698               | -3.909531 | -1.033991 |
| 21               | 6                | 0              | -2.196663               | -1.723492 | -2.366946 |
| 22               | 6                | 0              | -2.043412               | -0.312222 | 1.307295  |
| 23               | 1                | 0              | 0.013831                | -3.819679 | 0.217200  |
| 24               | 1                | 0              | -2.443139               | -0.781327 | -2.857133 |
| 25               | 1                | 0              | -1.142019               | -1.931609 | -2.556035 |
| 26               | 1                | 0              | -2.773165               | -2.508695 | -2.859119 |
| 27               | 1                | 0              | -1.289315               | 0.230959  | 1.874729  |
| 28               | 1                | 0              | -2.910767               | 0.340052  | 1.199460  |
| 29               | 1                | 0              | -2.348217               | -1.171612 | 1.907364  |
| 30               | 6                | 0              | -4.012646               | -1.439451 | -0.598654 |
| 31               | 6                | 0              | -4.499888               | -0.088643 | -1.166492 |
| 32               | 6                | 0              | -5.848534               | 0.388938  | -0.632867 |
| 33               | 6                | 0              | -6.282677               | 1.768787  | -1.161760 |
| 34               | 6                | 0              | -5.810516               | 2.741787  | -0.076761 |
| 35               | 6                | 0              | -5.762942               | 1.863204  | 1.170120  |
| 36               | 8                | 0              | -5.788375               | 0.552558  | 0.814076  |
| 37               | 1                | 0              | -6.618358               | -0.361688 | -0.806680 |
| 38               | 1                | 0              | -7.371333               | 1.811966  | -1.248413 |
| 39               | 1                | 0              | -5.861614               | 1.978893  | -2.145318 |
| 40               | 1                | 0              | -4.770851               | 3.035306  | -0.265198 |
| 41               | 6                | 0              | -6.647882               | 4.001693  | 0.117017  |
| 42               | 1                | 0              | -4.149623               | -1.404884 | 0.483632  |
| 43               | 1                | 0              | -4.596266               | -0.158810 | -2.255258 |
| 44               | 1                | 0              | -3.764625               | 0.695304  | -0.974488 |
| 45               | 8                | 0              | -5.699694               | 2.213822  | 2.314530  |
| 46               | 1                | 0              | -6.285066               | 4.573605  | 0.971650  |
| 47               | 1                | 0              | -6.602232               | 4.636671  | -0.770254 |
| 48               | 1                | 0              | -7.694803               | 3.749142  | 0.301202  |
| 49               | 1                | 0              | 1.295817                | -0.415158 | -1.433584 |
| 50               | 6                | 0              | 2.898939                | 0.380927  | -0.277727 |
| 51               | 6                | 0              | 3.441065                | 0.846651  | -1.636752 |

|    |   |   |           |           |           |
|----|---|---|-----------|-----------|-----------|
| 52 | 6 | 0 | 3.080109  | 1.490111  | 0.792393  |
| 53 | 1 | 0 | 4.510205  | 1.062962  | -1.610385 |
| 54 | 1 | 0 | 3.289947  | 0.085341  | -2.403581 |
| 55 | 1 | 0 | 2.931940  | 1.759766  | -1.952627 |
| 56 | 6 | 0 | 4.503019  | 1.984379  | 1.088934  |
| 57 | 6 | 0 | 5.030461  | 3.017362  | 0.117217  |
| 58 | 8 | 0 | 4.377693  | 3.893257  | -0.393596 |
| 59 | 8 | 0 | 6.361275  | 2.877927  | -0.081888 |
| 60 | 6 | 0 | 6.971209  | 3.867782  | -0.930435 |
| 61 | 6 | 0 | 4.724966  | -1.560649 | -0.553464 |
| 62 | 1 | 0 | 3.838559  | -0.871749 | 1.234734  |
| 63 | 6 | 0 | 4.644458  | -2.457912 | -1.536297 |
| 64 | 6 | 0 | 6.079120  | -1.062575 | -0.111856 |
| 65 | 1 | 0 | 5.538742  | -2.818089 | -2.031431 |
| 66 | 1 | 0 | 3.709673  | -2.871342 | -1.890904 |
| 67 | 1 | 0 | 6.879656  | -1.598564 | -0.622948 |
| 68 | 1 | 0 | 6.212950  | 0.003017  | -0.313933 |
| 69 | 1 | 0 | 6.213531  | -1.199819 | 0.966286  |
| 70 | 1 | 0 | 5.224042  | 1.175511  | 1.190068  |
| 71 | 1 | 0 | 4.488177  | 2.496658  | 2.058016  |
| 72 | 1 | 0 | 2.644811  | 1.131241  | 1.723717  |
| 73 | 1 | 0 | 2.496115  | 2.361854  | 0.489970  |
| 74 | 8 | 0 | 2.203531  | -4.299998 | 1.054291  |
| 75 | 1 | 0 | 3.315157  | -2.944108 | 2.025853  |
| 76 | 6 | 0 | 0.792252  | -1.458260 | 2.938490  |
| 77 | 1 | 0 | 0.482263  | -0.828010 | 3.772426  |
| 78 | 1 | 0 | -0.012745 | -2.156387 | 2.699460  |
| 79 | 1 | 0 | 1.675951  | -2.027650 | 3.245945  |
| 80 | 6 | 0 | -4.912189 | -2.577234 | -1.118558 |
| 81 | 1 | 0 | -5.951264 | -2.415765 | -0.825072 |
| 82 | 1 | 0 | -4.889379 | -2.651674 | -2.208834 |
| 83 | 1 | 0 | -4.620315 | -3.545225 | -0.711332 |
| 84 | 1 | 0 | 6.836796  | 4.863797  | -0.509359 |
| 85 | 1 | 0 | 8.025770  | 3.607076  | -0.970092 |
| 86 | 1 | 0 | 6.529848  | 3.839097  | -1.926289 |

---

| Center<br>Number | Atomic<br>Number | Atomic<br>Type | Coordinates (Angstroms) |           |           |
|------------------|------------------|----------------|-------------------------|-----------|-----------|
|                  |                  |                | X                       | Y         | Z         |
| 1                | 6                | 0              | -0.772208               | 0.226223  | -1.109993 |
| 2                | 6                | 0              | 0.614874                | 0.862206  | -0.894629 |
| 3                | 1                | 0              | -0.757931               | -0.236167 | -2.097634 |
| 4                | 1                | 0              | -1.521164               | 1.021440  | -1.149811 |
| 5                | 1                | 0              | 0.628056                | 1.497747  | -0.007912 |
| 6                | 1                | 0              | 0.822820                | 1.504253  | -1.754451 |
| 7                | 6                | 0              | 3.801185                | -1.130935 | 0.042706  |
| 8                | 6                | 0              | 2.632880                | -2.103112 | 0.311824  |
| 9                | 6                | 0              | 1.406508                | -1.139265 | 0.437250  |
| 10               | 6                | 0              | 1.668183                | -0.237085 | -0.786357 |
| 11               | 6                | 0              | 2.946932                | -3.039887 | 1.458511  |
| 12               | 1                | 0              | 2.420628                | -2.737058 | -0.551046 |
| 13               | 8                | 0              | 1.520286                | -0.278869 | 1.588666  |
| 14               | 6                | 0              | -1.830027               | -3.168183 | 0.320801  |
| 15               | 6                | 0              | -2.263048               | -1.916964 | -0.504875 |
| 16               | 6                | 0              | -1.173956               | -0.821507 | -0.036934 |
| 17               | 6                | 0              | 0.021185                | -1.727842 | 0.326964  |
| 18               | 6                | 0              | -0.357064               | -2.985706 | 0.532707  |
| 19               | 1                | 0              | -2.348337               | -3.212492 | 1.287512  |
| 20               | 1                | 0              | -2.067474               | -4.102667 | -0.194761 |
| 21               | 6                | 0              | -2.086334               | -2.280786 | -1.993117 |
| 22               | 6                | 0              | -1.634286               | -0.066536 | 1.232640  |
| 23               | 1                | 0              | 0.299381                | -3.792122 | 0.832964  |
| 24               | 1                | 0              | -2.357950               | -1.467232 | -2.666275 |
| 25               | 1                | 0              | -1.052816               | -2.558806 | -2.207963 |
| 26               | 1                | 0              | -2.709548               | -3.139356 | -2.249189 |
| 27               | 1                | 0              | -0.834338               | 0.575473  | 1.598199  |
| 28               | 1                | 0              | -2.503208               | 0.563417  | 1.038051  |
| 29               | 1                | 0              | -1.896260               | -0.754387 | 2.038943  |
| 30               | 6                | 0              | -3.753789               | -1.550186 | -0.208214 |
| 31               | 6                | 0              | -4.265523               | -0.348787 | -1.033156 |
| 32               | 6                | 0              | -5.544345               | 0.293525  | -0.520362 |
| 33               | 6                | 0              | -6.050885               | 1.481699  | -1.351967 |
| 34               | 6                | 0              | -6.702043               | 2.400868  | -0.311222 |
| 35               | 6                | 0              | -5.977549               | 2.019634  | 0.977804  |
| 36               | 8                | 0              | -5.313333               | 0.845882  | 0.807557  |
| 37               | 1                | 0              | -6.333706               | -0.454408 | -0.407302 |
| 38               | 1                | 0              | -6.737804               | 1.162834  | -2.137264 |
| 39               | 1                | 0              | -5.204489               | 1.981888  | -1.829612 |
| 40               | 1                | 0              | -6.499647               | 3.454930  | -0.506044 |
| 41               | 6                | 0              | -8.216713               | 2.209271  | -0.145427 |
| 42               | 1                | 0              | -3.804782               | -1.263619 | 0.843868  |
| 43               | 1                | 0              | -4.455863               | -0.660968 | -2.066202 |
| 44               | 1                | 0              | -3.508422               | 0.435332  | -1.082655 |
| 45               | 8                | 0              | -5.969765               | 2.614351  | 2.018061  |
| 46               | 1                | 0              | -8.588705               | 2.804905  | 0.689168  |
| 47               | 1                | 0              | -8.737724               | 2.522140  | -1.052566 |
| 48               | 1                | 0              | -8.470693               | 1.163595  | 0.046052  |
| 49               | 1                | 0              | 1.500889                | -0.898525 | -1.645128 |
| 50               | 6                | 0              | 3.199685                | 0.077821  | -0.813342 |
| 51               | 6                | 0              | 3.676026                | 0.057045  | -2.273914 |

|    |   |   |           |           |           |
|----|---|---|-----------|-----------|-----------|
| 52 | 6 | 0 | 3.616319  | 1.402632  | -0.115251 |
| 53 | 1 | 0 | 4.728199  | 0.332137  | -2.373208 |
| 54 | 1 | 0 | 3.554091  | -0.934737 | -2.711774 |
| 55 | 1 | 0 | 3.094766  | 0.757858  | -2.878365 |
| 56 | 6 | 0 | 3.406594  | 2.714747  | -0.899957 |
| 57 | 6 | 0 | 3.889449  | 3.895575  | -0.091784 |
| 58 | 8 | 0 | 3.188948  | 4.633793  | 0.555747  |
| 59 | 8 | 0 | 5.235132  | 4.023475  | -0.157264 |
| 60 | 6 | 0 | 5.796234  | 5.099180  | 0.615301  |
| 61 | 6 | 0 | 5.076167  | -1.772620 | -0.472964 |
| 62 | 1 | 0 | 4.052815  | -0.698807 | 1.017729  |
| 63 | 6 | 0 | 5.115486  | -2.965677 | -1.066310 |
| 64 | 6 | 0 | 6.349735  | -0.997949 | -0.237312 |
| 65 | 1 | 0 | 6.055376  | -3.387233 | -1.403719 |
| 66 | 1 | 0 | 4.234791  | -3.571207 | -1.236306 |
| 67 | 1 | 0 | 7.219097  | -1.542689 | -0.607141 |
| 68 | 1 | 0 | 6.330835  | -0.021526 | -0.728539 |
| 69 | 1 | 0 | 6.494447  | -0.806707 | 0.831106  |
| 70 | 1 | 0 | 2.355626  | 2.890329  | -1.114551 |
| 71 | 1 | 0 | 3.959480  | 2.688885  | -1.840146 |
| 72 | 1 | 0 | 4.682583  | 1.334868  | 0.114718  |
| 73 | 1 | 0 | 3.094202  | 1.468981  | 0.840411  |
| 74 | 8 | 0 | 2.519970  | -4.163546 | 1.569087  |
| 75 | 1 | 0 | 3.651326  | -2.642407 | 2.218767  |
| 76 | 6 | 0 | 1.295034  | -0.846175 | 2.871611  |
| 77 | 1 | 0 | 0.465394  | -1.556327 | 2.867368  |
| 78 | 1 | 0 | 2.190432  | -1.348181 | 3.253611  |
| 79 | 1 | 0 | 1.053876  | -0.019292 | 3.539853  |
| 80 | 6 | 0 | -4.703058 | -2.750357 | -0.384144 |
| 81 | 1 | 0 | -5.715032 | -2.495174 | -0.063277 |
| 82 | 1 | 0 | -4.764534 | -3.074992 | -1.425904 |
| 83 | 1 | 0 | -4.391882 | -3.605981 | 0.215157  |
| 84 | 1 | 0 | 6.869482  | 5.048489  | 0.449660  |
| 85 | 1 | 0 | 5.400369  | 6.056522  | 0.277221  |
| 86 | 1 | 0 | 5.563540  | 4.971169  | 1.672216  |

---

| Center<br>Number | Atomic<br>Number | Atomic<br>Type | Coordinates (Angstroms) |           |           |
|------------------|------------------|----------------|-------------------------|-----------|-----------|
|                  |                  |                | X                       | Y         | Z         |
| 1                | 6                | 0              | -1.010514               | 0.536273  | -0.813797 |
| 2                | 6                | 0              | 0.339164                | 1.106279  | -0.338798 |
| 3                | 1                | 0              | -0.912728               | 0.328575  | -1.879827 |
| 4                | 1                | 0              | -1.777012               | 1.309992  | -0.717664 |
| 5                | 1                | 0              | 0.269457                | 1.489255  | 0.680020  |
| 6                | 1                | 0              | 0.606321                | 1.952579  | -0.978416 |
| 7                | 6                | 0              | 3.518709                | -1.038658 | 0.240209  |
| 8                | 6                | 0              | 2.336753                | -2.049032 | 0.262673  |
| 9                | 6                | 0              | 1.086731                | -1.150869 | 0.530426  |
| 10               | 6                | 0              | 1.401397                | 0.015297  | -0.427735 |
| 11               | 6                | 0              | 2.615649                | -3.198841 | 1.202809  |
| 12               | 1                | 0              | 2.178198                | -2.493154 | -0.721072 |
| 13               | 8                | 0              | 1.098163                | -0.596991 | 1.861743  |
| 14               | 6                | 0              | -2.081685               | -3.115237 | -0.311236 |
| 15               | 6                | 0              | -2.481009               | -1.708073 | -0.855546 |
| 16               | 6                | 0              | -1.461193               | -0.745296 | -0.057427 |
| 17               | 6                | 0              | -0.272874               | -1.704802 | 0.178996  |
| 18               | 6                | 0              | -0.634266               | -2.978019 | 0.054365  |
| 19               | 1                | 0              | -2.670802               | -3.388548 | 0.573927  |
| 20               | 1                | 0              | -2.255632               | -3.904816 | -1.047257 |
| 21               | 6                | 0              | -2.178654               | -1.710980 | -2.367250 |
| 22               | 6                | 0              | -2.034641               | -0.321074 | 1.315516  |
| 23               | 1                | 0              | 0.017128                | -3.829135 | 0.208088  |
| 24               | 1                | 0              | -2.421933               | -0.765599 | -2.852728 |
| 25               | 1                | 0              | -1.123732               | -1.919901 | -2.553959 |
| 26               | 1                | 0              | -2.754825               | -2.492320 | -2.865907 |
| 27               | 1                | 0              | -1.283064               | 0.222594  | 1.885845  |
| 28               | 1                | 0              | -2.902811               | 0.329969  | 1.207844  |
| 29               | 1                | 0              | -2.339389               | -1.182715 | 1.912341  |
| 30               | 6                | 0              | -3.999975               | -1.432717 | -0.603575 |
| 31               | 6                | 0              | -4.481761               | -0.077017 | -1.164414 |
| 32               | 6                | 0              | -5.830143               | 0.401082  | -0.630533 |
| 33               | 6                | 0              | -6.259347               | 1.785545  | -1.151355 |
| 34               | 6                | 0              | -5.788095               | 2.750201  | -0.058512 |
| 35               | 6                | 0              | -5.745001               | 1.863140  | 1.182490  |
| 36               | 8                | 0              | -5.772410               | 0.554899  | 0.817515  |
| 37               | 1                | 0              | -6.601728               | -0.346204 | -0.810923 |
| 38               | 1                | 0              | -7.347617               | 1.831909  | -1.241017 |
| 39               | 1                | 0              | -5.834804               | 2.001139  | -2.132221 |
| 40               | 1                | 0              | -4.747508               | 3.043307  | -0.242386 |
| 41               | 6                | 0              | -6.623846               | 4.010147  | 0.141941  |
| 42               | 1                | 0              | -4.140488               | -1.404668 | 0.478439  |
| 43               | 1                | 0              | -4.576131               | -0.140510 | -2.253760 |
| 44               | 1                | 0              | -3.744455               | 0.703516  | -0.966270 |
| 45               | 8                | 0              | -5.683359               | 2.205737  | 2.329379  |
| 46               | 1                | 0              | -6.262052               | 4.575535  | 1.001322  |
| 47               | 1                | 0              | -6.575040               | 4.651129  | -0.740828 |
| 48               | 1                | 0              | -7.671608               | 3.758075  | 0.321937  |
| 49               | 1                | 0              | 1.299927                | -0.428247 | -1.425863 |
| 50               | 6                | 0              | 2.917110                | 0.348728  | -0.280328 |
| 51               | 6                | 0              | 3.468267                | 0.812073  | -1.638571 |

|    |   |   |           |           |           |
|----|---|---|-----------|-----------|-----------|
| 52 | 6 | 0 | 3.147883  | 1.464856  | 0.772596  |
| 53 | 1 | 0 | 4.557019  | 0.894230  | -1.634625 |
| 54 | 1 | 0 | 3.194112  | 0.127819  | -2.442683 |
| 55 | 1 | 0 | 3.064724  | 1.794740  | -1.889981 |
| 56 | 6 | 0 | 4.597529  | 1.937933  | 0.959144  |
| 57 | 6 | 0 | 5.008379  | 3.089976  | 0.066618  |
| 58 | 8 | 0 | 4.265219  | 3.896420  | -0.436170 |
| 59 | 8 | 0 | 6.351970  | 3.144222  | -0.065939 |
| 60 | 6 | 0 | 6.859914  | 4.251571  | -0.830694 |
| 61 | 6 | 0 | 4.761027  | -1.606207 | -0.431864 |
| 62 | 1 | 0 | 3.793862  | -0.866537 | 1.283683  |
| 63 | 6 | 0 | 5.948986  | -1.527795 | 0.169418  |
| 64 | 6 | 0 | 4.628098  | -2.338754 | -1.746048 |
| 65 | 1 | 0 | 6.843664  | -1.936746 | -0.286052 |
| 66 | 1 | 0 | 6.070974  | -1.060427 | 1.139840  |
| 67 | 1 | 0 | 5.610508  | -2.559397 | -2.164868 |
| 68 | 1 | 0 | 4.107218  | -3.291549 | -1.610739 |
| 69 | 1 | 0 | 4.063482  | -1.772487 | -2.488119 |
| 70 | 1 | 0 | 5.326202  | 1.135572  | 0.848259  |
| 71 | 1 | 0 | 4.723786  | 2.315771  | 1.980340  |
| 72 | 1 | 0 | 2.765566  | 1.113622  | 1.729890  |
| 73 | 1 | 0 | 2.552526  | 2.338040  | 0.498762  |
| 74 | 8 | 0 | 2.288432  | -4.344198 | 1.002838  |
| 75 | 1 | 0 | 3.198783  | -2.943906 | 2.111353  |
| 76 | 6 | 0 | 0.767657  | -1.451228 | 2.948615  |
| 77 | 1 | 0 | 1.640839  | -2.010257 | 3.300407  |
| 78 | 1 | 0 | 0.422061  | -0.808181 | 3.758582  |
| 79 | 1 | 0 | -0.025169 | -2.156541 | 2.691432  |
| 80 | 6 | 0 | -4.900624 | -2.564787 | -1.133900 |
| 81 | 1 | 0 | -5.940167 | -2.402719 | -0.842467 |
| 82 | 1 | 0 | -4.874688 | -2.631773 | -2.224591 |
| 83 | 1 | 0 | -4.612438 | -3.536278 | -0.732403 |
| 84 | 1 | 0 | 7.940570  | 4.133760  | -0.830222 |
| 85 | 1 | 0 | 6.470844  | 4.222003  | -1.848108 |
| 86 | 1 | 0 | 6.576183  | 5.196483  | -0.367676 |

---

| Center<br>Number | Atomic<br>Number | Atomic<br>Type | Coordinates (Angstroms) |           |           |
|------------------|------------------|----------------|-------------------------|-----------|-----------|
|                  |                  |                | X                       | Y         | Z         |
| 1                | 6                | 0              | -0.801400               | 0.042419  | -1.213639 |
| 2                | 6                | 0              | 0.576373                | 0.734845  | -1.203739 |
| 3                | 1                | 0              | -0.842868               | -0.561707 | -2.120592 |
| 4                | 1                | 0              | -1.579313               | 0.804123  | -1.310579 |
| 5                | 1                | 0              | 0.627198                | 1.503874  | -0.432316 |
| 6                | 1                | 0              | 0.716058                | 1.238746  | -2.164313 |
| 7                | 6                | 0              | 3.887611                | -0.930966 | -0.163509 |
| 8                | 6                | 0              | 2.798989                | -1.896112 | 0.360303  |
| 9                | 6                | 0              | 1.525573                | -0.986315 | 0.391869  |
| 10               | 6                | 0              | 1.654453                | -0.322612 | -0.993084 |
| 11               | 6                | 0              | 3.227439                | -2.588603 | 1.635887  |
| 12               | 1                | 0              | 2.581237                | -2.687802 | -0.359660 |
| 13               | 8                | 0              | 1.654621                | 0.067621  | 1.367234  |
| 14               | 6                | 0              | -1.621254               | -3.111689 | 0.821325  |
| 15               | 6                | 0              | -2.144441               | -2.042310 | -0.186725 |
| 16               | 6                | 0              | -1.088771               | -0.841647 | 0.034079  |
| 17               | 6                | 0              | 0.164622                | -1.632496 | 0.474938  |
| 18               | 6                | 0              | -0.148353               | -2.846872 | 0.915871  |
| 19               | 1                | 0              | -2.090359               | -2.999941 | 1.807654  |
| 20               | 1                | 0              | -1.844412               | -4.129884 | 0.491677  |
| 21               | 6                | 0              | -2.008789               | -2.651750 | -1.596800 |
| 22               | 6                | 0              | -1.521384               | 0.088746  | 1.192165  |
| 23               | 1                | 0              | 0.557062                | -3.565464 | 1.313069  |
| 24               | 1                | 0              | -2.349532               | -1.981601 | -2.386350 |
| 25               | 1                | 0              | -0.971150               | -2.914994 | -1.809647 |
| 26               | 1                | 0              | -2.595714               | -3.569019 | -1.670751 |
| 27               | 1                | 0              | -0.741957               | 0.821705  | 1.397065  |
| 28               | 1                | 0              | -2.434810               | 0.634262  | 0.953010  |
| 29               | 1                | 0              | -1.697239               | -0.468898 | 2.114192  |
| 30               | 6                | 0              | -3.637583               | -1.685834 | 0.110716  |
| 31               | 6                | 0              | -4.241290               | -0.685175 | -0.899056 |
| 32               | 6                | 0              | -5.505165               | 0.021042  | -0.436482 |
| 33               | 6                | 0              | -6.131023               | 0.967910  | -1.471348 |
| 34               | 6                | 0              | -6.741101               | 2.085836  | -0.617073 |
| 35               | 6                | 0              | -5.895547               | 2.039314  | 0.653549  |
| 36               | 8                | 0              | -5.196033               | 0.875031  | 0.703248  |
| 37               | 1                | 0              | -6.246413               | -0.701423 | -0.084597 |
| 38               | 1                | 0              | -6.861013               | 0.455160  | -2.099384 |
| 39               | 1                | 0              | -5.349340               | 1.366603  | -2.123003 |
| 40               | 1                | 0              | -6.609086               | 3.070329  | -1.067929 |
| 41               | 6                | 0              | -8.225477               | 1.892451  | -0.273739 |
| 42               | 1                | 0              | -3.659945               | -1.209401 | 1.092795  |
| 43               | 1                | 0              | -4.485410               | -1.203795 | -1.832968 |
| 44               | 1                | 0              | -3.517414               | 0.089135  | -1.157521 |
| 45               | 8                | 0              | -5.826838               | 2.864281  | 1.520141  |
| 46               | 1                | 0              | -8.557800               | 2.655228  | 0.431592  |
| 47               | 1                | 0              | -8.834275               | 1.968529  | -1.176945 |
| 48               | 1                | 0              | -8.409537               | 0.913363  | 0.175814  |
| 49               | 1                | 0              | 1.403019                | -1.133934 | -1.685435 |
| 50               | 6                | 0              | 3.172554                | -0.029683 | -1.259544 |
| 51               | 6                | 0              | 3.486057                | -0.514139 | -2.689145 |

|    |   |   |           |           |           |
|----|---|---|-----------|-----------|-----------|
| 52 | 6 | 0 | 3.570242  | 1.467921  | -1.216403 |
| 53 | 1 | 0 | 4.528415  | -0.342948 | -2.963842 |
| 54 | 1 | 0 | 3.285632  | -1.580626 | -2.806253 |
| 55 | 1 | 0 | 2.863679  | 0.025100  | -3.409105 |
| 56 | 6 | 0 | 3.551992  | 2.207707  | 0.121102  |
| 57 | 6 | 0 | 3.729235  | 3.699898  | -0.045130 |
| 58 | 8 | 0 | 3.637030  | 4.318307  | -1.077005 |
| 59 | 8 | 0 | 3.991828  | 4.287984  | 1.144232  |
| 60 | 6 | 0 | 4.131189  | 5.719031  | 1.114879  |
| 61 | 6 | 0 | 5.198668  | -1.581534 | -0.560849 |
| 62 | 1 | 0 | 4.119243  | -0.271136 | 0.678382  |
| 63 | 6 | 0 | 5.328860  | -2.880385 | -0.831155 |
| 64 | 6 | 0 | 6.399602  | -0.669055 | -0.595701 |
| 65 | 1 | 0 | 6.293072  | -3.298507 | -1.096489 |
| 66 | 1 | 0 | 4.501052  | -3.576819 | -0.798766 |
| 67 | 1 | 0 | 7.304969  | -1.212711 | -0.867428 |
| 68 | 1 | 0 | 6.268231  | 0.147154  | -1.311040 |
| 69 | 1 | 0 | 6.561466  | -0.203594 | 0.382255  |
| 70 | 1 | 0 | 4.332683  | 1.859662  | 0.801014  |
| 71 | 1 | 0 | 2.614485  | 2.048863  | 0.657563  |
| 72 | 1 | 0 | 2.921002  | 2.006186  | -1.910104 |
| 73 | 1 | 0 | 4.572227  | 1.567714  | -1.642978 |
| 74 | 8 | 0 | 2.845136  | -3.677395 | 1.990969  |
| 75 | 1 | 0 | 3.970815  | -2.039161 | 2.249997  |
| 76 | 6 | 0 | 1.533409  | -0.274728 | 2.740964  |
| 77 | 1 | 0 | 0.728157  | -0.991093 | 2.915928  |
| 78 | 1 | 0 | 2.466961  | -0.685204 | 3.139671  |
| 79 | 1 | 0 | 1.310137  | 0.650025  | 3.273539  |
| 80 | 6 | 0 | -4.535742 | -2.933336 | 0.209284  |
| 81 | 1 | 0 | -5.551042 | -2.657585 | 0.502114  |
| 82 | 1 | 0 | -4.607270 | -3.463910 | -0.743511 |
| 83 | 1 | 0 | -4.175863 | -3.638165 | 0.958994  |
| 84 | 1 | 0 | 4.953917  | 6.008730  | 0.461610  |
| 85 | 1 | 0 | 3.212292  | 6.184342  | 0.758718  |
| 86 | 1 | 0 | 4.335511  | 6.012585  | 2.141452  |

---



| Center<br>Number | Atomic<br>Number | Atomic<br>Type | Coordinates (Angstroms) |           |           |
|------------------|------------------|----------------|-------------------------|-----------|-----------|
|                  |                  |                | X                       | Y         | Z         |
| 1                | 6                | 0              | -1.002358               | 0.148951  | -1.160396 |
| 2                | 6                | 0              | 0.393807                | 0.795248  | -1.089155 |
| 3                | 1                | 0              | -1.031646               | -0.447616 | -2.073008 |
| 4                | 1                | 0              | -1.752376               | 0.935294  | -1.277850 |
| 5                | 1                | 0              | 0.446778                | 1.539170  | -0.293788 |
| 6                | 1                | 0              | 0.581149                | 1.322065  | -2.029436 |
| 7                | 6                | 0              | 3.625085                | -1.171158 | -0.186898 |
| 8                | 6                | 0              | 2.463677                | -1.965587 | 0.460246  |
| 9                | 6                | 0              | 1.244518                | -0.991930 | 0.490028  |
| 10               | 6                | 0              | 1.438404                | -0.293793 | -0.871676 |
| 11               | 6                | 0              | 2.866155                | -2.649780 | 1.746290  |
| 12               | 1                | 0              | 2.149748                | -2.786770 | -0.193578 |
| 13               | 8                | 0              | 1.393341                | 0.029394  | 1.494977  |
| 14               | 6                | 0              | -2.012822               | -2.984310 | 0.814840  |
| 15               | 6                | 0              | -2.463844               | -1.878837 | -0.189021 |
| 16               | 6                | 0              | -1.358873               | -0.732045 | 0.069525  |
| 17               | 6                | 0              | -0.149049               | -1.580181 | 0.525438  |
| 18               | 6                | 0              | -0.532353               | -2.783213 | 0.941203  |
| 19               | 1                | 0              | -2.497945               | -2.862671 | 1.792030  |
| 20               | 1                | 0              | -2.273891               | -3.987004 | 0.466137  |
| 21               | 6                | 0              | -2.328402               | -2.475470 | -1.604551 |
| 22               | 6                | 0              | -1.768374               | 0.202729  | 1.232671  |
| 23               | 1                | 0              | 0.119652                | -3.547158 | 1.346443  |
| 24               | 1                | 0              | -2.624567               | -1.780192 | -2.390208 |
| 25               | 1                | 0              | -1.299685               | -2.781228 | -1.803637 |
| 26               | 1                | 0              | -2.954158               | -3.364428 | -1.702302 |
| 27               | 1                | 0              | -0.954871               | 0.887432  | 1.467981  |
| 28               | 1                | 0              | -2.644610               | 0.801116  | 0.980885  |
| 29               | 1                | 0              | -1.997927               | -0.357935 | 2.140977  |
| 30               | 6                | 0              | -3.944226               | -1.457860 | 0.086125  |
| 31               | 6                | 0              | -4.477275               | -0.404274 | -0.909016 |
| 32               | 6                | 0              | -5.737616               | 0.323326  | -0.469917 |
| 33               | 6                | 0              | -6.279237               | 1.344951  | -1.480892 |
| 34               | 6                | 0              | -6.897194               | 2.435098  | -0.596743 |
| 35               | 6                | 0              | -6.119016               | 2.291904  | 0.709370  |
| 36               | 8                | 0              | -5.457215               | 1.104091  | 0.727374  |
| 37               | 1                | 0              | -6.520030               | -0.388900 | -0.194818 |
| 38               | 1                | 0              | -6.991620               | 0.891850  | -2.171858 |
| 39               | 1                | 0              | -5.452957               | 1.751573  | -2.069536 |
| 40               | 1                | 0              | -6.712226               | 3.437388  | -0.985397 |
| 41               | 6                | 0              | -8.402153               | 2.273187  | -0.337215 |
| 42               | 1                | 0              | -3.963845               | -1.004154 | 1.078925  |
| 43               | 1                | 0              | -4.699829               | -0.880047 | -1.870746 |
| 44               | 1                | 0              | -3.720879               | 0.355857  | -1.109674 |
| 45               | 8                | 0              | -6.070880               | 3.064676  | 1.623722  |
| 46               | 1                | 0              | -8.746565               | 3.010046  | 0.389511  |
| 47               | 1                | 0              | -8.961915               | 2.414160  | -1.264018 |
| 48               | 1                | 0              | -8.637933               | 1.279385  | 0.051902  |
| 49               | 1                | 0              | 1.222116                | -1.080459 | -1.606384 |
| 50               | 6                | 0              | 2.958583                | 0.006567  | -1.036845 |
| 51               | 6                | 0              | 3.308190                | -0.025450 | -2.533226 |

|    |   |   |           |           |           |
|----|---|---|-----------|-----------|-----------|
| 52 | 6 | 0 | 3.316130  | 1.399809  | -0.456080 |
| 53 | 1 | 0 | 4.376866  | 0.095491  | -2.714967 |
| 54 | 1 | 0 | 3.012660  | -0.966435 | -2.997598 |
| 55 | 1 | 0 | 2.791810  | 0.786141  | -3.053782 |
| 56 | 6 | 0 | 4.789896  | 1.800609  | -0.522777 |
| 57 | 6 | 0 | 5.031088  | 3.210105  | -0.027103 |
| 58 | 8 | 0 | 4.187193  | 4.047599  | 0.172597  |
| 59 | 8 | 0 | 6.352529  | 3.436404  | 0.153356  |
| 60 | 6 | 0 | 6.703229  | 4.760430  | 0.591617  |
| 61 | 6 | 0 | 4.631422  | -2.064355 | -0.904562 |
| 62 | 1 | 0 | 4.165966  | -0.706197 | 0.638579  |
| 63 | 6 | 0 | 4.289755  | -3.116132 | -1.647592 |
| 64 | 6 | 0 | 6.081452  | -1.701471 | -0.720204 |
| 65 | 1 | 0 | 5.042692  | -3.720483 | -2.139963 |
| 66 | 1 | 0 | 3.261628  | -3.421090 | -1.804756 |
| 67 | 1 | 0 | 6.739358  | -2.407431 | -1.228432 |
| 68 | 1 | 0 | 6.296761  | -0.701429 | -1.108074 |
| 69 | 1 | 0 | 6.336611  | -1.692627 | 0.343774  |
| 70 | 1 | 0 | 5.178051  | 1.767112  | -1.545878 |
| 71 | 1 | 0 | 5.428486  | 1.134231  | 0.060507  |
| 72 | 1 | 0 | 2.987227  | 1.449341  | 0.580646  |
| 73 | 1 | 0 | 2.739447  | 2.157064  | -0.991824 |
| 74 | 8 | 0 | 3.964916  | -2.590656 | 2.242586  |
| 75 | 1 | 0 | 2.083518  | -3.273000 | 2.223911  |
| 76 | 6 | 0 | 1.235373  | -0.336032 | 2.859437  |
| 77 | 1 | 0 | 0.376711  | -0.994932 | 3.011172  |
| 78 | 1 | 0 | 2.134109  | -0.813564 | 3.258522  |
| 79 | 1 | 0 | 1.067863  | 0.591826  | 3.406664  |
| 80 | 6 | 0 | -4.901714 | -2.663660 | 0.135509  |
| 81 | 1 | 0 | -5.904100 | -2.350744 | 0.434180  |
| 82 | 1 | 0 | -4.992086 | -3.156208 | -0.835927 |
| 83 | 1 | 0 | -4.580151 | -3.411185 | 0.860871  |
| 84 | 1 | 0 | 7.786647  | 4.759900  | 0.681020  |
| 85 | 1 | 0 | 6.378409  | 5.502371  | -0.137683 |
| 86 | 1 | 0 | 6.238924  | 4.978753  | 1.552995  |

---

| Center<br>Number | Atomic<br>Number | Atomic<br>Type | Coordinates (Angstroms) |           |           |
|------------------|------------------|----------------|-------------------------|-----------|-----------|
|                  |                  |                | X                       | Y         | Z         |
| 1                | 6                | 0              | -1.074231               | 0.190309  | -1.137446 |
| 2                | 6                | 0              | 0.320540                | 0.836045  | -1.027080 |
| 3                | 1                | 0              | -1.099278               | -0.356093 | -2.080809 |
| 4                | 1                | 0              | -1.825779               | 0.980387  | -1.216603 |
| 5                | 1                | 0              | 0.369257                | 1.536053  | -0.192215 |
| 6                | 1                | 0              | 0.509344                | 1.414322  | -1.936690 |
| 7                | 6                | 0              | 3.548218                | -1.124894 | -0.137927 |
| 8                | 6                | 0              | 2.378067                | -2.025110 | 0.350650  |
| 9                | 6                | 0              | 1.167646                | -1.039895 | 0.446905  |
| 10               | 6                | 0              | 1.367890                | -0.261001 | -0.869252 |
| 11               | 6                | 0              | 2.769748                | -2.811698 | 1.580115  |
| 12               | 1                | 0              | 2.102570                | -2.761439 | -0.405516 |
| 13               | 8                | 0              | 1.335857                | -0.084241 | 1.511892  |
| 14               | 6                | 0              | -2.073204               | -3.055025 | 0.652386  |
| 15               | 6                | 0              | -2.532350               | -1.892889 | -0.283301 |
| 16               | 6                | 0              | -1.432092               | -0.758195 | 0.040601  |
| 17               | 6                | 0              | -0.222651               | -1.628294 | 0.448929  |
| 18               | 6                | 0              | -0.593744               | -2.856791 | 0.795425  |
| 19               | 1                | 0              | -2.560903               | -2.997873 | 1.634336  |
| 20               | 1                | 0              | -2.326829               | -4.036710 | 0.243643  |
| 21               | 6                | 0              | -2.397823               | -2.405235 | -1.731397 |
| 22               | 6                | 0              | -1.845460               | 0.110014  | 1.252612  |
| 23               | 1                | 0              | 0.072663                | -3.631559 | 1.153180  |
| 24               | 1                | 0              | -2.690659               | -1.664687 | -2.476113 |
| 25               | 1                | 0              | -1.370605               | -2.705246 | -1.946705 |
| 26               | 1                | 0              | -3.027967               | -3.283895 | -1.879606 |
| 27               | 1                | 0              | -1.031682               | 0.777987  | 1.531086  |
| 28               | 1                | 0              | -2.717032               | 0.727235  | 1.031123  |
| 29               | 1                | 0              | -2.084133               | -0.498822 | 2.126484  |
| 30               | 6                | 0              | -4.014420               | -1.496437 | 0.019680  |
| 31               | 6                | 0              | -4.552116               | -0.378009 | -0.898579 |
| 32               | 6                | 0              | -5.861969               | 0.262624  | -0.443519 |
| 33               | 6                | 0              | -6.313101               | 1.456773  | -1.305478 |
| 34               | 6                | 0              | -5.778033               | 2.677291  | -0.549842 |
| 35               | 6                | 0              | -5.669038               | 2.168550  | 0.884661  |
| 36               | 8                | 0              | -5.716926               | 0.810874  | 0.898440  |
| 37               | 1                | 0              | -6.647785               | -0.487560 | -0.365352 |
| 38               | 1                | 0              | -7.404448               | 1.497864  | -1.348061 |
| 39               | 1                | 0              | -5.942552               | 1.384027  | -2.328339 |
| 40               | 1                | 0              | -4.748006               | 2.887528  | -0.861536 |
| 41               | 6                | 0              | -6.595612               | 3.959690  | -0.663913 |
| 42               | 1                | 0              | -4.037103               | -1.113590 | 1.041440  |
| 43               | 1                | 0              | -4.728282               | -0.776085 | -1.903815 |
| 44               | 1                | 0              | -3.808615               | 0.413754  | -1.010660 |
| 45               | 8                | 0              | -5.545237               | 2.814274  | 1.886630  |
| 46               | 1                | 0              | -6.184834               | 4.732777  | -0.013769 |
| 47               | 1                | 0              | -6.591470               | 4.331243  | -1.690763 |
| 48               | 1                | 0              | -7.633366               | 3.788064  | -0.368308 |
| 49               | 1                | 0              | 1.153990                | -1.001383 | -1.649979 |
| 50               | 6                | 0              | 2.889490                | 0.047859  | -1.002418 |
| 51               | 6                | 0              | 3.285076                | 0.040568  | -2.489055 |

|    |   |   |           |           |           |
|----|---|---|-----------|-----------|-----------|
| 52 | 6 | 0 | 3.233666  | 1.435266  | -0.400926 |
| 53 | 1 | 0 | 4.367038  | 0.049015  | -2.626777 |
| 54 | 1 | 0 | 2.893965  | -0.832272 | -3.013313 |
| 55 | 1 | 0 | 2.879069  | 0.924862  | -2.988261 |
| 56 | 6 | 0 | 4.704833  | 1.847822  | -0.469605 |
| 57 | 6 | 0 | 4.938714  | 3.245833  | 0.059312  |
| 58 | 8 | 0 | 4.094553  | 4.089287  | 0.231955  |
| 59 | 8 | 0 | 6.252539  | 3.455991  | 0.302842  |
| 60 | 6 | 0 | 6.597140  | 4.773623  | 0.765425  |
| 61 | 6 | 0 | 4.690104  | -1.924726 | -0.748319 |
| 62 | 1 | 0 | 3.956190  | -0.643377 | 0.754103  |
| 63 | 6 | 0 | 5.950284  | -1.703025 | -0.373171 |
| 64 | 6 | 0 | 4.377465  | -3.028766 | -1.730778 |
| 65 | 1 | 0 | 6.774472  | -2.269622 | -0.791404 |
| 66 | 1 | 0 | 6.205702  | -0.955662 | 0.369087  |
| 67 | 1 | 0 | 5.289348  | -3.392708 | -2.205339 |
| 68 | 1 | 0 | 3.907162  | -3.878812 | -1.226937 |
| 69 | 1 | 0 | 3.691495  | -2.708174 | -2.516231 |
| 70 | 1 | 0 | 5.079291  | 1.844504  | -1.498246 |
| 71 | 1 | 0 | 5.356297  | 1.168162  | 0.081070  |
| 72 | 1 | 0 | 2.904732  | 1.465371  | 0.637340  |
| 73 | 1 | 0 | 2.649581  | 2.194950  | -0.924772 |
| 74 | 8 | 0 | 2.418340  | -3.943692 | 1.812323  |
| 75 | 1 | 0 | 3.462676  | -2.295973 | 2.276250  |
| 76 | 6 | 0 | 1.122876  | -0.517325 | 2.848353  |
| 77 | 1 | 0 | 0.948562  | 0.381612  | 3.439946  |
| 78 | 1 | 0 | 0.256568  | -1.176033 | 2.935588  |
| 79 | 1 | 0 | 2.000721  | -1.031262 | 3.253061  |
| 80 | 6 | 0 | -4.968303 | -2.705957 | -0.013481 |
| 81 | 1 | 0 | -5.961863 | -2.425812 | 0.341131  |
| 82 | 1 | 0 | -5.083580 | -3.111097 | -1.022127 |
| 83 | 1 | 0 | -4.623565 | -3.513161 | 0.632664  |
| 84 | 1 | 0 | 7.675660  | 4.761492  | 0.901050  |
| 85 | 1 | 0 | 6.311244  | 5.523532  | 0.028112  |
| 86 | 1 | 0 | 6.094089  | 4.990253  | 1.707500  |

---

| Center<br>Number | Atomic<br>Number | Atomic<br>Type | Coordinates (Angstroms) |           |           |
|------------------|------------------|----------------|-------------------------|-----------|-----------|
|                  |                  |                | X                       | Y         | Z         |
| 1                | 6                | 0              | -0.982850               | 0.081065  | -1.189414 |
| 2                | 6                | 0              | 0.403810                | 0.751187  | -1.176254 |
| 3                | 1                | 0              | -1.017876               | -0.560091 | -2.070803 |
| 4                | 1                | 0              | -1.747547               | 0.848902  | -1.332046 |
| 5                | 1                | 0              | 0.457210                | 1.534501  | -0.419803 |
| 6                | 1                | 0              | 0.566775                | 1.231849  | -2.145228 |
| 7                | 6                | 0              | 3.682659                | -1.111706 | -0.221563 |
| 8                | 6                | 0              | 2.544015                | -1.887425 | 0.486106  |
| 9                | 6                | 0              | 1.308436                | -0.935905 | 0.479815  |
| 10               | 6                | 0              | 1.468973                | -0.309701 | -0.920347 |
| 11               | 6                | 0              | 2.974329                | -2.493664 | 1.801948  |
| 12               | 1                | 0              | 2.237658                | -2.748959 | -0.117669 |
| 13               | 8                | 0              | 1.451934                | 0.143117  | 1.424997  |
| 14               | 6                | 0              | -1.904767               | -2.970070 | 0.950079  |
| 15               | 6                | 0              | -2.392549               | -1.921939 | -0.096625 |
| 16               | 6                | 0              | -1.305006               | -0.743953 | 0.088208  |
| 17               | 6                | 0              | -0.073241               | -1.545978 | 0.567395  |
| 18               | 6                | 0              | -0.427100               | -2.735583 | 1.043919  |
| 19               | 1                | 0              | -2.377035               | -2.812947 | 1.928341  |
| 20               | 1                | 0              | -2.151228               | -3.992646 | 0.652129  |
| 21               | 6                | 0              | -2.268168               | -2.582350 | -1.484703 |
| 22               | 6                | 0              | -1.716997               | 0.239989  | 1.209252  |
| 23               | 1                | 0              | 0.244882                | -3.468234 | 1.473862  |
| 24               | 1                | 0              | -2.587052               | -1.928714 | -2.296716 |
| 25               | 1                | 0              | -1.237398               | -2.880393 | -1.685340 |
| 26               | 1                | 0              | -2.879791               | -3.485227 | -1.531957 |
| 27               | 1                | 0              | -0.916514               | 0.954530  | 1.396166  |
| 28               | 1                | 0              | -2.611186               | 0.804289  | 0.942530  |
| 29               | 1                | 0              | -1.918499               | -0.279145 | 2.148463  |
| 30               | 6                | 0              | -3.876167               | -1.515243 | 0.182570  |
| 31               | 6                | 0              | -4.449509               | -0.532510 | -0.861547 |
| 32               | 6                | 0              | -5.706667               | 0.206417  | -0.432749 |
| 33               | 6                | 0              | -6.295102               | 1.150175  | -1.492179 |
| 34               | 6                | 0              | -6.901233               | 2.289636  | -0.663881 |
| 35               | 6                | 0              | -6.079796               | 2.245868  | 0.622552  |
| 36               | 8                | 0              | -5.400952               | 1.070134  | 0.699864  |
| 37               | 1                | 0              | -6.468909               | -0.496031 | -0.085236 |
| 38               | 1                | 0              | -7.022146               | 0.642205  | -2.127451 |
| 39               | 1                | 0              | -5.494058               | 1.526247  | -2.133721 |
| 40               | 1                | 0              | -6.744355               | 3.265595  | -1.125141 |
| 41               | 6                | 0              | -8.394597               | 2.125529  | -0.345304 |
| 42               | 1                | 0              | -3.887362               | -1.004713 | 1.147521  |
| 43               | 1                | 0              | -4.691470               | -1.071194 | -1.784535 |
| 44               | 1                | 0              | -3.708503               | 0.221826  | -1.130189 |
| 45               | 8                | 0              | -6.012741               | 3.080165  | 1.479919  |
| 46               | 1                | 0              | -8.726872               | 2.903429  | 0.343289  |
| 47               | 1                | 0              | -8.985417               | 2.198974  | -1.260553 |
| 48               | 1                | 0              | -8.603028               | 1.155959  | 0.114140  |
| 49               | 1                | 0              | 1.252353                | -1.136865 | -1.608707 |
| 50               | 6                | 0              | 2.982169                | 0.001397  | -1.128408 |
| 51               | 6                | 0              | 3.309447                | -0.109716 | -2.625490 |

|    |   |   |           |           |           |
|----|---|---|-----------|-----------|-----------|
| 52 | 6 | 0 | 3.327754  | 1.430357  | -0.632349 |
| 53 | 1 | 0 | 4.374288  | 0.007030  | -2.829788 |
| 54 | 1 | 0 | 3.013230  | -1.077040 | -3.031456 |
| 55 | 1 | 0 | 2.780525  | 0.668996  | -3.182257 |
| 56 | 6 | 0 | 4.802724  | 1.855292  | -0.769345 |
| 57 | 6 | 0 | 4.966399  | 3.294820  | -0.342896 |
| 58 | 8 | 0 | 4.643427  | 4.252124  | -1.003464 |
| 59 | 8 | 0 | 5.499985  | 3.397197  | 0.894111  |
| 60 | 6 | 0 | 5.651174  | 4.736343  | 1.397418  |
| 61 | 6 | 0 | 4.694757  | -2.029233 | -0.899822 |
| 62 | 1 | 0 | 4.226548  | -0.587716 | 0.565564  |
| 63 | 6 | 0 | 4.358859  | -3.120114 | -1.586812 |
| 64 | 6 | 0 | 6.141861  | -1.644508 | -0.740292 |
| 65 | 1 | 0 | 5.114447  | -3.741838 | -2.052681 |
| 66 | 1 | 0 | 3.332454  | -3.441045 | -1.722541 |
| 67 | 1 | 0 | 6.804062  | -2.367385 | -1.218258 |
| 68 | 1 | 0 | 6.345503  | -0.661631 | -1.175526 |
| 69 | 1 | 0 | 6.401304  | -1.583001 | 0.320859  |
| 70 | 1 | 0 | 5.125944  | 1.797498  | -1.809477 |
| 71 | 1 | 0 | 5.451725  | 1.225438  | -0.162037 |
| 72 | 1 | 0 | 3.030315  | 1.522357  | 0.411942  |
| 73 | 1 | 0 | 2.726707  | 2.146232  | -1.198824 |
| 74 | 8 | 0 | 4.080981  | -2.398243 | 2.274066  |
| 75 | 1 | 0 | 2.204926  | -3.093648 | 2.328283  |
| 76 | 6 | 0 | 1.329445  | -0.152737 | 2.810107  |
| 77 | 1 | 0 | 0.499160  | -0.834327 | 3.011743  |
| 78 | 1 | 0 | 2.252451  | -0.573350 | 3.217686  |
| 79 | 1 | 0 | 1.133991  | 0.796072  | 3.310285  |
| 80 | 6 | 0 | -4.807321 | -2.734779 | 0.320113  |
| 81 | 1 | 0 | -5.813950 | -2.423252 | 0.606032  |
| 82 | 1 | 0 | -4.895067 | -3.292265 | -0.615848 |
| 83 | 1 | 0 | -4.465345 | -3.426161 | 1.090555  |
| 84 | 1 | 0 | 6.085178  | 4.627666  | 2.388123  |
| 85 | 1 | 0 | 6.310625  | 5.313468  | 0.749677  |
| 86 | 1 | 0 | 4.682841  | 5.233023  | 1.453644  |

---

| Center<br>Number | Atomic<br>Number | Atomic<br>Type | Coordinates (Angstroms) |           |           |
|------------------|------------------|----------------|-------------------------|-----------|-----------|
|                  |                  |                | X                       | Y         | Z         |
| 1                | 6                | 0              | -1.022012               | 0.150986  | -1.103718 |
| 2                | 6                | 0              | 0.358604                | 0.821599  | -0.971640 |
| 3                | 1                | 0              | -1.037915               | -0.361990 | -2.065842 |
| 4                | 1                | 0              | -1.789827               | 0.927728  | -1.152168 |
| 5                | 1                | 0              | 0.390691                | 1.487882  | -0.108833 |
| 6                | 1                | 0              | 0.531442                | 1.439381  | -1.858317 |
| 7                | 6                | 0              | 3.631020                | -1.117777 | -0.185597 |
| 8                | 6                | 0              | 2.479017                | -2.045206 | 0.283652  |
| 9                | 6                | 0              | 1.250095                | -1.092109 | 0.426264  |
| 10               | 6                | 0              | 1.431067                | -0.257243 | -0.856585 |
| 11               | 6                | 0              | 2.896051                | -2.882496 | 1.473782  |
| 12               | 1                | 0              | 2.198910                | -2.753291 | -0.495881 |
| 13               | 8                | 0              | 1.398229                | -0.176643 | 1.528788  |
| 14               | 6                | 0              | -1.952785               | -3.174320 | 0.568074  |
| 15               | 6                | 0              | -2.438851               | -1.985930 | -0.318848 |
| 16               | 6                | 0              | -1.355863               | -0.845236 | 0.040884  |
| 17               | 6                | 0              | -0.129040               | -1.708084 | 0.409204  |
| 18               | 6                | 0              | -0.476241               | -2.955661 | 0.709556  |
| 19               | 1                | 0              | -2.433326               | -3.163970 | 1.555010  |
| 20               | 1                | 0              | -2.192689               | -4.143865 | 0.123426  |
| 21               | 6                | 0              | -2.305853               | -2.440546 | -1.786435 |
| 22               | 6                | 0              | -1.778474               | -0.029161 | 1.285462  |
| 23               | 1                | 0              | 0.206888                | -3.729847 | 1.035088  |
| 24               | 1                | 0              | -2.611719               | -1.675587 | -2.500571 |
| 25               | 1                | 0              | -1.276103               | -2.719085 | -2.017900 |
| 26               | 1                | 0              | -2.925364               | -3.321014 | -1.965420 |
| 27               | 1                | 0              | -0.972878               | 0.638059  | 1.588042  |
| 28               | 1                | 0              | -2.660048               | 0.582920  | 1.089793  |
| 29               | 1                | 0              | -2.004762               | -0.674579 | 2.136259  |
| 30               | 6                | 0              | -3.925767               | -1.625900 | 0.005880  |
| 31               | 6                | 0              | -4.494776               | -0.501796 | -0.887589 |
| 32               | 6                | 0              | -5.777760               | 0.147677  | -0.374112 |
| 33               | 6                | 0              | -6.297112               | 1.302571  | -1.250873 |
| 34               | 6                | 0              | -5.720564               | 2.556148  | -0.585585 |
| 35               | 6                | 0              | -5.506308               | 2.107922  | 0.857428  |
| 36               | 8                | 0              | -5.547367               | 0.752309  | 0.931831  |
| 37               | 1                | 0              | -6.549360               | -0.603711 | -0.211248 |
| 38               | 1                | 0              | -7.389064               | 1.336284  | -1.218870 |
| 39               | 1                | 0              | -5.998086               | 1.188847  | -2.293183 |
| 40               | 1                | 0              | -4.717002               | 2.759351  | -0.978009 |
| 41               | 6                | 0              | -6.555387               | 3.828003  | -0.693721 |
| 42               | 1                | 0              | -3.947716               | -1.264262 | 1.035375  |
| 43               | 1                | 0              | -4.716658               | -0.900104 | -1.883586 |
| 44               | 1                | 0              | -3.752361               | 0.285743  | -1.032268 |
| 45               | 8                | 0              | -5.312667               | 2.795956  | 1.819519  |
| 46               | 1                | 0              | -6.108304               | 4.629016  | -0.104108 |
| 47               | 1                | 0              | -6.624752               | 4.158313  | -1.732283 |
| 48               | 1                | 0              | -7.569003               | 3.661661  | -0.321312 |
| 49               | 1                | 0              | 1.237976                | -0.968470 | -1.669015 |
| 50               | 6                | 0              | 2.946761                | 0.096292  | -0.973505 |
| 51               | 6                | 0              | 3.324281                | 0.152758  | -2.461628 |

|    |   |   |           |           |           |
|----|---|---|-----------|-----------|-----------|
| 52 | 6 | 0 | 3.232817  | 1.463630  | -0.299725 |
| 53 | 1 | 0 | 4.380972  | 0.369089  | -2.622984 |
| 54 | 1 | 0 | 3.109535  | -0.791998 | -2.962820 |
| 55 | 1 | 0 | 2.750268  | 0.937701  | -2.962120 |
| 56 | 6 | 0 | 4.697777  | 1.940061  | -0.286356 |
| 57 | 6 | 0 | 4.808876  | 3.262072  | 0.434974  |
| 58 | 8 | 0 | 5.048338  | 3.395351  | 1.609930  |
| 59 | 8 | 0 | 4.575970  | 4.303441  | -0.395271 |
| 60 | 6 | 0 | 4.610124  | 5.605588  | 0.215507  |
| 61 | 6 | 0 | 4.761576  | -1.862479 | -0.887269 |
| 62 | 1 | 0 | 4.066669  | -0.684802 | 0.721639  |
| 63 | 6 | 0 | 4.593525  | -3.006348 | -1.551071 |
| 64 | 6 | 0 | 6.141469  | -1.263082 | -0.773476 |
| 65 | 1 | 0 | 5.434143  | -3.499386 | -2.025334 |
| 66 | 1 | 0 | 3.636902  | -3.501472 | -1.652739 |
| 67 | 1 | 0 | 6.890844  | -1.912422 | -1.227161 |
| 68 | 1 | 0 | 6.204881  | -0.287636 | -1.261663 |
| 69 | 1 | 0 | 6.414832  | -1.108378 | 0.275378  |
| 70 | 1 | 0 | 5.081792  | 2.057940  | -1.300399 |
| 71 | 1 | 0 | 5.329256  | 1.237402  | 0.254528  |
| 72 | 1 | 0 | 2.871832  | 1.426494  | 0.727575  |
| 73 | 1 | 0 | 2.641607  | 2.223920  | -0.817381 |
| 74 | 8 | 0 | 2.482895  | -3.990242 | 1.716234  |
| 75 | 1 | 0 | 3.664880  | -2.424714 | 2.131297  |
| 76 | 6 | 0 | 1.247560  | -0.686144 | 2.846745  |
| 77 | 1 | 0 | 0.421897  | -1.397032 | 2.921014  |
| 78 | 1 | 0 | 2.164960  | -1.168018 | 3.200391  |
| 79 | 1 | 0 | 1.041884  | 0.170579  | 3.488536  |
| 80 | 6 | 0 | -4.855889 | -2.853008 | -0.047015 |
| 81 | 1 | 0 | -5.861464 | -2.592810 | 0.289223  |
| 82 | 1 | 0 | -4.945300 | -3.256438 | -1.058822 |
| 83 | 1 | 0 | -4.508508 | -3.655616 | 0.603416  |
| 84 | 1 | 0 | 4.399792  | 6.309135  | -0.586051 |
| 85 | 1 | 0 | 3.856270  | 5.677953  | 0.999074  |
| 86 | 1 | 0 | 5.592270  | 5.797028  | 0.646993  |

---



| Center<br>Number | Atomic<br>Number | Atomic<br>Type | Coordinates (Angstroms) |           |           |
|------------------|------------------|----------------|-------------------------|-----------|-----------|
|                  |                  |                | X                       | Y         | Z         |
| 1                | 6                | 0              | -0.846125               | 0.142327  | -1.045697 |
| 2                | 6                | 0              | 0.517133                | 0.823684  | -0.815774 |
| 3                | 1                | 0              | -0.820130               | -0.289836 | -2.046780 |
| 4                | 1                | 0              | -1.626523               | 0.907932  | -1.057961 |
| 5                | 1                | 0              | 0.510608                | 1.422986  | 0.096198  |
| 6                | 1                | 0              | 0.696929                | 1.506302  | -1.650512 |
| 7                | 6                | 0              | 3.785108                | -1.088397 | 0.018168  |
| 8                | 6                | 0              | 2.649331                | -2.104968 | 0.287663  |
| 9                | 6                | 0              | 1.394246                | -1.183285 | 0.449210  |
| 10               | 6                | 0              | 1.612034                | -0.238276 | -0.750480 |
| 11               | 6                | 0              | 3.006752                | -3.042904 | 1.417500  |
| 12               | 1                | 0              | 2.449947                | -2.735403 | -0.580871 |
| 13               | 8                | 0              | 1.482160                | -0.351991 | 1.623647  |
| 14               | 6                | 0              | -1.764054               | -3.328629 | 0.301168  |
| 15               | 6                | 0              | -2.250206               | -2.074379 | -0.489975 |
| 16               | 6                | 0              | -1.199918               | -0.951196 | -0.000888 |
| 17               | 6                | 0              | 0.031564                | -1.820362 | 0.331052  |
| 18               | 6                | 0              | -0.297158               | -3.096535 | 0.506118  |
| 19               | 1                | 0              | -2.271309               | -3.414990 | 1.270719  |
| 20               | 1                | 0              | -1.971231               | -4.258162 | -0.235648 |
| 21               | 6                | 0              | -2.068062               | -2.393337 | -1.987755 |
| 22               | 6                | 0              | -1.678398               | -0.250297 | 1.292749  |
| 23               | 1                | 0              | 0.391452                | -3.886032 | 0.778895  |
| 24               | 1                | 0              | -2.373076               | -1.573761 | -2.638851 |
| 25               | 1                | 0              | -1.025926               | -2.626844 | -2.213799 |
| 26               | 1                | 0              | -2.659973               | -3.267904 | -2.263683 |
| 27               | 1                | 0              | -0.903161               | 0.414771  | 1.670004  |
| 28               | 1                | 0              | -2.574104               | 0.348092  | 1.122040  |
| 29               | 1                | 0              | -1.906826               | -0.968524 | 2.082392  |
| 30               | 6                | 0              | -3.752011               | -1.771968 | -0.174931 |
| 31               | 6                | 0              | -4.320831               | -0.579604 | -0.974777 |
| 32               | 6                | 0              | -5.641794               | -0.020515 | -0.450728 |
| 33               | 6                | 0              | -6.155037               | 1.213416  | -1.216595 |
| 34               | 6                | 0              | -5.642665               | 2.397577  | -0.390646 |
| 35               | 6                | 0              | -5.475053               | 1.794904  | 1.001380  |
| 36               | 8                | 0              | -5.483304               | 0.439004  | 0.922942  |
| 37               | 1                | 0              | -6.399085               | -0.802146 | -0.408195 |
| 38               | 1                | 0              | -7.247866               | 1.218056  | -1.230665 |
| 39               | 1                | 0              | -5.808973               | 1.224324  | -2.250511 |
| 40               | 1                | 0              | -4.630276               | 2.668318  | -0.713608 |
| 41               | 6                | 0              | -6.509452               | 3.652587  | -0.392455 |
| 42               | 1                | 0              | -3.806211               | -1.505961 | 0.882262  |
| 43               | 1                | 0              | -4.492848               | -0.880363 | -2.013897 |
| 44               | 1                | 0              | -3.597499               | 0.237858  | -1.008538 |
| 45               | 8                | 0              | -5.339320               | 2.374558  | 2.041622  |
| 46               | 1                | 0              | -6.108846               | 4.393862  | 0.299718  |
| 47               | 1                | 0              | -6.548357               | 4.094161  | -1.390427 |
| 48               | 1                | 0              | -7.531300               | 3.420954  | -0.082815 |
| 49               | 1                | 0              | 1.456004                | -0.881317 | -1.625609 |
| 50               | 6                | 0              | 3.129449                | 0.127367  | -0.788015 |
| 51               | 6                | 0              | 3.589700                | 0.208041  | -2.251552 |

|    |   |   |           |           |           |
|----|---|---|-----------|-----------|-----------|
| 52 | 6 | 0 | 3.545469  | 1.420511  | -0.035340 |
| 53 | 1 | 0 | 4.656823  | 0.427600  | -2.328081 |
| 54 | 1 | 0 | 3.398183  | -0.722967 | -2.786064 |
| 55 | 1 | 0 | 3.046780  | 0.992448  | -2.783999 |
| 56 | 6 | 0 | 3.232863  | 2.769172  | -0.687906 |
| 57 | 6 | 0 | 3.822256  | 3.928262  | 0.087436  |
| 58 | 8 | 0 | 4.658248  | 3.852846  | 0.952867  |
| 59 | 8 | 0 | 3.298695  | 5.102377  | -0.332766 |
| 60 | 6 | 0 | 3.817398  | 6.280829  | 0.308636  |
| 61 | 6 | 0 | 5.065443  | -1.688992 | -0.537679 |
| 62 | 1 | 0 | 4.046603  | -0.672724 | 0.993355  |
| 63 | 6 | 0 | 6.248428  | -1.259016 | -0.095844 |
| 64 | 6 | 0 | 4.989408  | -2.804865 | -1.551545 |
| 65 | 1 | 0 | 7.178086  | -1.660818 | -0.482857 |
| 66 | 1 | 0 | 6.329468  | -0.493737 | 0.667572  |
| 67 | 1 | 0 | 5.982154  | -3.047932 | -1.931947 |
| 68 | 1 | 0 | 4.574835  | -3.713919 | -1.104889 |
| 69 | 1 | 0 | 4.353444  | -2.556966 | -2.403955 |
| 70 | 1 | 0 | 2.164213  | 2.953771  | -0.794730 |
| 71 | 1 | 0 | 3.651388  | 2.836895  | -1.696938 |
| 72 | 1 | 0 | 4.628369  | 1.377693  | 0.107683  |
| 73 | 1 | 0 | 3.107700  | 1.399043  | 0.963051  |
| 74 | 8 | 0 | 2.705028  | -4.211988 | 1.460333  |
| 75 | 1 | 0 | 3.625917  | -2.605321 | 2.226624  |
| 76 | 6 | 0 | 1.272180  | -0.954978 | 2.893679  |
| 77 | 1 | 0 | 0.944100  | -0.162870 | 3.567292  |
| 78 | 1 | 0 | 0.505613  | -1.732001 | 2.858170  |
| 79 | 1 | 0 | 2.197438  | -1.383471 | 3.291777  |
| 80 | 6 | 0 | -4.654923 | -3.005665 | -0.364598 |
| 81 | 1 | 0 | -5.670454 | -2.799650 | -0.021243 |
| 82 | 1 | 0 | -4.720603 | -3.308876 | -1.412568 |
| 83 | 1 | 0 | -4.300201 | -3.861474 | 0.209499  |
| 84 | 1 | 0 | 4.891464  | 6.363496  | 0.143440  |
| 85 | 1 | 0 | 3.293885  | 7.115896  | -0.149991 |
| 86 | 1 | 0 | 3.622865  | 6.248014  | 1.380317  |

---

| Center<br>Number | Atomic<br>Number | Atomic<br>Type | Coordinates (Angstroms) |           |           |
|------------------|------------------|----------------|-------------------------|-----------|-----------|
|                  |                  |                | X                       | Y         | Z         |
| 1                | 6                | 0              | 1.142325                | -0.299479 | -1.198669 |
| 2                | 6                | 0              | -0.203370               | -1.048366 | -1.170736 |
| 3                | 1                | 0              | 1.154009                | 0.303343  | -2.107778 |
| 4                | 1                | 0              | 1.950973                | -1.028642 | -1.296103 |
| 5                | 1                | 0              | -0.223147               | -1.788197 | -0.369947 |
| 6                | 1                | 0              | -0.316432               | -1.593263 | -2.113270 |
| 7                | 6                | 0              | -3.593679               | 0.661207  | -0.335502 |
| 8                | 6                | 0              | -2.501727               | 1.590879  | 0.256329  |
| 9                | 6                | 0              | -1.233716               | 0.684550  | 0.359969  |
| 10               | 6                | 0              | -1.335336               | -0.039740 | -0.995823 |
| 11               | 6                | 0              | -2.998818               | 2.299683  | 1.498216  |
| 12               | 1                | 0              | -2.225655               | 2.378944  | -0.444458 |
| 13               | 8                | 0              | -1.364997               | -0.334291 | 1.367726  |
| 14               | 6                | 0              | 1.860916                | 2.883353  | 0.819478  |
| 15               | 6                | 0              | 2.427872                | 1.815738  | -0.166046 |
| 16               | 6                | 0              | 1.392057                | 0.597416  | 0.044965  |
| 17               | 6                | 0              | 0.113333                | 1.363369  | 0.449087  |
| 18               | 6                | 0              | 0.391521                | 2.589517  | 0.881630  |
| 19               | 1                | 0              | 2.307946                | 2.788904  | 1.817771  |
| 20               | 1                | 0              | 2.072453                | 3.903012  | 0.486291  |
| 21               | 6                | 0              | 2.310571                | 2.409397  | -1.584487 |
| 22               | 6                | 0              | 1.817059                | -0.313504 | 1.221256  |
| 23               | 1                | 0              | -0.337140               | 3.298335  | 1.253901  |
| 24               | 1                | 0              | 2.669491                | 1.733893  | -2.361275 |
| 25               | 1                | 0              | 1.274287                | 2.661262  | -1.816487 |
| 26               | 1                | 0              | 2.891056                | 3.330948  | -1.658261 |
| 27               | 1                | 0              | 1.038594                | -1.046372 | 1.429243  |
| 28               | 1                | 0              | 2.737358                | -0.856382 | 1.001653  |
| 29               | 1                | 0              | 1.976634                | 0.259709  | 2.136712  |
| 30               | 6                | 0              | 3.921484                | 1.489871  | 0.164003  |
| 31               | 6                | 0              | 4.569136                | 0.511797  | -0.840928 |
| 32               | 6                | 0              | 5.829428                | -0.183731 | -0.353372 |
| 33               | 6                | 0              | 6.509110                | -1.087562 | -1.392930 |
| 34               | 6                | 0              | 7.106711                | -2.222375 | -0.552519 |
| 35               | 6                | 0              | 6.217424                | -2.227633 | 0.688901  |
| 36               | 8                | 0              | 5.497523                | -1.076833 | 0.749486  |
| 37               | 1                | 0              | 6.543484                | 0.541609  | 0.045811  |
| 38               | 1                | 0              | 7.252583                | -0.543494 | -1.977342 |
| 39               | 1                | 0              | 5.758653                | -1.477500 | -2.085417 |
| 40               | 1                | 0              | 7.005491                | -3.194241 | -1.037482 |
| 41               | 6                | 0              | 8.575291                | -2.018551 | -0.152108 |
| 42               | 1                | 0              | 3.932672                | 1.005819  | 1.142483  |
| 43               | 1                | 0              | 4.832367                | 1.048076  | -1.759583 |
| 44               | 1                | 0              | 3.864778                | -0.268943 | -1.132137 |
| 45               | 8                | 0              | 6.133147                | -3.080343 | 1.526913  |
| 46               | 1                | 0              | 8.895091                | -2.798413 | 0.540225  |
| 47               | 1                | 0              | 9.215928                | -2.056968 | -1.035518 |
| 48               | 1                | 0              | 8.728561                | -1.051707 | 0.333984  |
| 49               | 1                | 0              | -1.158357               | 0.749836  | -1.736383 |
| 50               | 6                | 0              | -2.828534               | -0.456456 | -1.191709 |
| 51               | 6                | 0              | -3.147177               | -0.406589 | -2.694234 |

|    |   |   |           |           |           |
|----|---|---|-----------|-----------|-----------|
| 52 | 6 | 0 | -3.057730 | -1.896062 | -0.652469 |
| 53 | 1 | 0 | -4.180833 | -0.672385 | -2.919126 |
| 54 | 1 | 0 | -2.976958 | 0.589544  | -3.104231 |
| 55 | 1 | 0 | -2.505775 | -1.108477 | -3.235153 |
| 56 | 6 | 0 | -4.445377 | -2.538330 | -0.796721 |
| 57 | 6 | 0 | -5.393241 | -2.332681 | 0.365455  |
| 58 | 8 | 0 | -5.124038 | -1.838131 | 1.432630  |
| 59 | 8 | 0 | -6.616285 | -2.825249 | 0.071531  |
| 60 | 6 | 0 | -7.592641 | -2.751490 | 1.125547  |
| 61 | 6 | 0 | -4.721916 | 1.414570  | -1.029124 |
| 62 | 1 | 0 | -4.045379 | 0.136903  | 0.509628  |
| 63 | 6 | 0 | -4.582638 | 2.615363  | -1.591356 |
| 64 | 6 | 0 | -6.073738 | 0.746285  | -1.019291 |
| 65 | 1 | 0 | -5.425443 | 3.107516  | -2.063040 |
| 66 | 1 | 0 | -3.648139 | 3.160568  | -1.606488 |
| 67 | 1 | 0 | -6.400265 | 0.556155  | 0.007608  |
| 68 | 1 | 0 | -6.825784 | 1.365263  | -1.509831 |
| 69 | 1 | 0 | -6.055983 | -0.221087 | -1.527376 |
| 70 | 1 | 0 | -4.327440 | -3.625185 | -0.871554 |
| 71 | 1 | 0 | -4.963255 | -2.256544 | -1.715134 |
| 72 | 1 | 0 | -2.767269 | -1.932861 | 0.395988  |
| 73 | 1 | 0 | -2.360890 | -2.543823 | -1.190218 |
| 74 | 8 | 0 | -2.643113 | 3.397850  | 1.853297  |
| 75 | 1 | 0 | -3.770522 | 1.755371  | 2.080747  |
| 76 | 6 | 0 | -1.314629 | 0.061262  | 2.730531  |
| 77 | 1 | 0 | -0.552520 | 0.823205  | 2.909626  |
| 78 | 1 | 0 | -2.284082 | 0.433463  | 3.076473  |
| 79 | 1 | 0 | -1.068138 | -0.832398 | 3.304216  |
| 80 | 6 | 0 | 4.790436  | 2.754992  | 0.291935  |
| 81 | 1 | 0 | 5.808021  | 2.497145  | 0.593602  |
| 82 | 1 | 0 | 4.862361  | 3.301023  | -0.652115 |
| 83 | 1 | 0 | 4.405366  | 3.440416  | 1.047072  |
| 84 | 1 | 0 | -7.777366 | -1.713857 | 1.402473  |
| 85 | 1 | 0 | -8.493402 | -3.204552 | 0.719492  |
| 86 | 1 | 0 | -7.248314 | -3.299177 | 2.002392  |

---

| Center<br>Number | Atomic<br>Number | Atomic<br>Type | Coordinates (Angstroms) |           |           |
|------------------|------------------|----------------|-------------------------|-----------|-----------|
|                  |                  |                | X                       | Y         | Z         |
| 1                | 6                | 0              | -1.001112               | 0.511250  | -0.792553 |
| 2                | 6                | 0              | 0.339569                | 1.101275  | -0.317677 |
| 3                | 1                | 0              | -0.906206               | 0.319182  | -1.861807 |
| 4                | 1                | 0              | -1.782025               | 1.268320  | -0.680477 |
| 5                | 1                | 0              | 0.266011                | 1.468726  | 0.706641  |
| 6                | 1                | 0              | 0.584070                | 1.962019  | -0.947632 |
| 7                | 6                | 0              | 3.571825                | -0.995711 | 0.169569  |
| 8                | 6                | 0              | 2.405884                | -2.018967 | 0.204996  |
| 9                | 6                | 0              | 1.141322                | -1.156421 | 0.507231  |
| 10               | 6                | 0              | 1.424507                | 0.034540  | -0.429482 |
| 11               | 6                | 0              | 2.727510                | -3.190075 | 1.109394  |
| 12               | 1                | 0              | 2.226454                | -2.446799 | -0.781301 |
| 13               | 8                | 0              | 1.152067                | -0.631936 | 1.850952  |
| 14               | 6                | 0              | -2.005458               | -3.161804 | -0.326349 |
| 15               | 6                | 0              | -2.431674               | -1.755852 | -0.851539 |
| 16               | 6                | 0              | -1.420185               | -0.787649 | -0.050384 |
| 17               | 6                | 0              | -0.212456               | -1.729691 | 0.159126  |
| 18               | 6                | 0              | -0.555845               | -3.006858 | 0.023516  |
| 19               | 1                | 0              | -2.579402               | -3.452031 | 0.563359  |
| 20               | 1                | 0              | -2.177119               | -3.946728 | -1.067866 |
| 21               | 6                | 0              | -2.141290               | -1.737121 | -2.365714 |
| 22               | 6                | 0              | -1.985726               | -0.396080 | 1.335622  |
| 23               | 1                | 0              | 0.111038                | -3.848158 | 0.162279  |
| 24               | 1                | 0              | -2.401859               | -0.789932 | -2.838547 |
| 25               | 1                | 0              | -1.085217               | -1.929159 | -2.563531 |
| 26               | 1                | 0              | -2.710613               | -2.520618 | -2.868862 |
| 27               | 1                | 0              | -1.234547               | 0.143304  | 1.910606  |
| 28               | 1                | 0              | -2.862733               | 0.246509  | 1.249582  |
| 29               | 1                | 0              | -2.273918               | -1.273775 | 1.917138  |
| 30               | 6                | 0              | -3.952697               | -1.504717 | -0.585945 |
| 31               | 6                | 0              | -4.461677               | -0.158347 | -1.145659 |
| 32               | 6                | 0              | -5.801889               | 0.309618  | -0.583271 |
| 33               | 6                | 0              | -6.270174               | 1.674847  | -1.121126 |
| 34               | 6                | 0              | -5.783311               | 2.671691  | -0.064700 |
| 35               | 6                | 0              | -5.684663               | 1.813265  | 1.193309  |
| 36               | 8                | 0              | -5.703336               | 0.497014  | 0.858712  |
| 37               | 1                | 0              | -6.565714               | -0.454108 | -0.723326 |
| 38               | 1                | 0              | -7.361258               | 1.701126  | -1.178968 |
| 39               | 1                | 0              | -5.878855               | 1.875186  | -2.118864 |
| 40               | 1                | 0              | -4.754733               | 2.979720  | -0.287609 |
| 41               | 6                | 0              | -6.636307               | 3.920170  | 0.135202  |
| 42               | 1                | 0              | -4.084144               | -1.476949 | 0.497171  |
| 43               | 1                | 0              | -4.580174               | -0.231753 | -2.232047 |
| 44               | 1                | 0              | -3.729154               | 0.632230  | -0.970857 |
| 45               | 8                | 0              | -5.589978               | 2.183111  | 2.329503  |
| 46               | 1                | 0              | -6.258905               | 4.510901  | 0.970508  |
| 47               | 1                | 0              | -6.627597               | 4.542375  | -0.762215 |
| 48               | 1                | 0              | -7.672911               | 3.652775  | 0.353561  |
| 49               | 1                | 0              | 1.330981                | -0.391483 | -1.435748 |
| 50               | 6                | 0              | 2.935127                | 0.402505  | -0.280485 |
| 51               | 6                | 0              | 3.455178                | 0.896991  | -1.638455 |

|    |   |   |           |           |           |
|----|---|---|-----------|-----------|-----------|
| 52 | 6 | 0 | 3.107236  | 1.498290  | 0.804693  |
| 53 | 1 | 0 | 4.519889  | 1.130140  | -1.624604 |
| 54 | 1 | 0 | 3.304636  | 0.146043  | -2.415531 |
| 55 | 1 | 0 | 2.919611  | 1.802674  | -1.936217 |
| 56 | 6 | 0 | 4.529931  | 1.960936  | 1.172104  |
| 57 | 6 | 0 | 5.240793  | 2.854353  | 0.181061  |
| 58 | 8 | 0 | 6.349455  | 2.664292  | -0.260189 |
| 59 | 8 | 0 | 4.502075  | 3.938926  | -0.135010 |
| 60 | 6 | 0 | 5.112497  | 4.865931  | -1.049825 |
| 61 | 6 | 0 | 4.792950  | -1.499815 | -0.594052 |
| 62 | 1 | 0 | 3.895138  | -0.862273 | 1.207949  |
| 63 | 6 | 0 | 4.721995  | -2.373691 | -1.598632 |
| 64 | 6 | 0 | 6.137829  | -0.992509 | -0.137087 |
| 65 | 1 | 0 | 5.620212  | -2.709425 | -2.103616 |
| 66 | 1 | 0 | 3.791920  | -2.790199 | -1.962455 |
| 67 | 1 | 0 | 6.946349  | -1.494097 | -0.670080 |
| 68 | 1 | 0 | 6.255017  | 0.082493  | -0.294371 |
| 69 | 1 | 0 | 6.276687  | -1.173464 | 0.934414  |
| 70 | 1 | 0 | 5.192383  | 1.124040  | 1.382932  |
| 71 | 1 | 0 | 4.452569  | 2.544234  | 2.095842  |
| 72 | 1 | 0 | 2.640455  | 1.135414  | 1.719513  |
| 73 | 1 | 0 | 2.540766  | 2.379781  | 0.497460  |
| 74 | 8 | 0 | 2.308044  | -4.312088 | 0.962408  |
| 75 | 1 | 0 | 3.430663  | -2.970037 | 1.940560  |
| 76 | 6 | 0 | 0.889114  | -1.531628 | 2.918595  |
| 77 | 1 | 0 | 0.587105  | -0.922912 | 3.771222  |
| 78 | 1 | 0 | 0.087169  | -2.232700 | 2.677802  |
| 79 | 1 | 0 | 1.783557  | -2.098248 | 3.198627  |
| 80 | 6 | 0 | -4.839263 | -2.652053 | -1.106972 |
| 81 | 1 | 0 | -5.882247 | -2.496318 | -0.824255 |
| 82 | 1 | 0 | -4.806101 | -2.732868 | -2.196476 |
| 83 | 1 | 0 | -4.544291 | -3.615446 | -0.691153 |
| 84 | 1 | 0 | 5.332031  | 4.375802  | -1.998065 |
| 85 | 1 | 0 | 4.383834  | 5.660658  | -1.188282 |
| 86 | 1 | 0 | 6.037325  | 5.261234  | -0.630496 |

---

| Center<br>Number | Atomic<br>Number | Atomic<br>Type | Coordinates (Angstroms) |           |           |
|------------------|------------------|----------------|-------------------------|-----------|-----------|
|                  |                  |                | X                       | Y         | Z         |
| 1                | 6                | 0              | -1.057634               | 0.510668  | -0.818268 |
| 2                | 6                | 0              | 0.288257                | 1.095542  | -0.352036 |
| 3                | 1                | 0              | -0.962717               | 0.298965  | -1.883682 |
| 4                | 1                | 0              | -1.832224               | 1.276105  | -0.721829 |
| 5                | 1                | 0              | 0.218424                | 1.485361  | 0.664089  |
| 6                | 1                | 0              | 0.545609                | 1.939345  | -0.998528 |
| 7                | 6                | 0              | 3.509152                | -1.046376 | 0.088017  |
| 8                | 6                | 0              | 2.325514                | -2.028382 | 0.286122  |
| 9                | 6                | 0              | 1.063376                | -1.146892 | 0.534664  |
| 10               | 6                | 0              | 1.360020                | 0.013890  | -0.436065 |
| 11               | 6                | 0              | 2.633244                | -3.131264 | 1.271883  |
| 12               | 1                | 0              | 2.115374                | -2.560653 | -0.648107 |
| 13               | 8                | 0              | 1.050236                | -0.578454 | 1.859713  |
| 14               | 6                | 0              | -2.099262               | -3.146026 | -0.294310 |
| 15               | 6                | 0              | -2.507222               | -1.745398 | -0.847359 |
| 16               | 6                | 0              | -1.493158               | -0.771289 | -0.054786 |
| 17               | 6                | 0              | -0.293831               | -1.717864 | 0.185355  |
| 18               | 6                | 0              | -0.652535               | -2.992248 | 0.066553  |
| 19               | 1                | 0              | -2.685142               | -3.416339 | 0.593755  |
| 20               | 1                | 0              | -2.268600               | -3.941389 | -1.025140 |
| 21               | 6                | 0              | -2.205091               | -1.755904 | -2.359166 |
| 22               | 6                | 0              | -2.066994               | -0.348839 | 1.318485  |
| 23               | 1                | 0              | -0.004448               | -3.846293 | 0.221321  |
| 24               | 1                | 0              | -2.456546               | -0.815806 | -2.850284 |
| 25               | 1                | 0              | -1.148478               | -1.956071 | -2.545914 |
| 26               | 1                | 0              | -2.775137               | -2.544996 | -2.852652 |
| 27               | 1                | 0              | -1.318217               | 0.201514  | 1.885557  |
| 28               | 1                | 0              | -2.940577               | 0.294609  | 1.209547  |
| 29               | 1                | 0              | -2.364102               | -1.211447 | 1.917904  |
| 30               | 6                | 0              | -4.028253               | -1.479770 | -0.596621 |
| 31               | 6                | 0              | -4.520298               | -0.131258 | -1.165369 |
| 32               | 6                | 0              | -5.875212               | 0.336298  | -0.638301 |
| 33               | 6                | 0              | -6.312271               | 1.717433  | -1.161435 |
| 34               | 6                | 0              | -5.855924               | 2.685599  | -0.065320 |
| 35               | 6                | 0              | -5.812103               | 1.798526  | 1.175566  |
| 36               | 8                | 0              | -5.825937               | 0.489826  | 0.809683  |
| 37               | 1                | 0              | -6.640051               | -0.416776 | -0.823236 |
| 38               | 1                | 0              | -7.400253               | 1.754867  | -1.258090 |
| 39               | 1                | 0              | -5.883315               | 1.936926  | -2.139517 |
| 40               | 1                | 0              | -4.816937               | 2.988067  | -0.242911 |
| 41               | 6                | 0              | -6.704042               | 3.937979  | 0.130620  |
| 42               | 1                | 0              | -4.168652               | -1.446020 | 0.485215  |
| 43               | 1                | 0              | -4.609962               | -0.199889 | -2.254774 |
| 44               | 1                | 0              | -3.791114               | 0.656845  | -0.967531 |
| 45               | 8                | 0              | -5.759854               | 2.140501  | 2.322908  |
| 46               | 1                | 0              | -6.352069               | 4.506583  | 0.991938  |
| 47               | 1                | 0              | -6.656077               | 4.579389  | -0.751858 |
| 48               | 1                | 0              | -7.750474               | 3.676526  | 0.304841  |
| 49               | 1                | 0              | 1.261951                | -0.441008 | -1.430502 |
| 50               | 6                | 0              | 2.871721                | 0.366909  | -0.304936 |
| 51               | 6                | 0              | 3.370712                | 0.924312  | -1.646065 |

|    |   |   |           |           |           |
|----|---|---|-----------|-----------|-----------|
| 52 | 6 | 0 | 3.103298  | 1.411965  | 0.819359  |
| 53 | 1 | 0 | 4.448463  | 1.096688  | -1.647380 |
| 54 | 1 | 0 | 3.161003  | 0.238679  | -2.467375 |
| 55 | 1 | 0 | 2.886123  | 1.879167  | -1.861033 |
| 56 | 6 | 0 | 4.548063  | 1.878428  | 1.049343  |
| 57 | 6 | 0 | 5.006827  | 3.000479  | 0.144017  |
| 58 | 8 | 0 | 4.314577  | 3.899859  | -0.264536 |
| 59 | 8 | 0 | 6.329888  | 2.910268  | -0.121778 |
| 60 | 6 | 0 | 6.881221  | 3.978883  | -0.911671 |
| 61 | 6 | 0 | 4.590799  | -1.606617 | -0.830638 |
| 62 | 1 | 0 | 3.974676  | -0.928141 | 1.067422  |
| 63 | 6 | 0 | 4.331191  | -2.274715 | -1.953837 |
| 64 | 6 | 0 | 6.013901  | -1.377467 | -0.393698 |
| 65 | 1 | 0 | 5.132638  | -2.654696 | -2.576607 |
| 66 | 1 | 0 | 3.325066  | -2.467318 | -2.308126 |
| 67 | 1 | 0 | 6.721754  | -1.860653 | -1.068447 |
| 68 | 1 | 0 | 6.258234  | -0.311301 | -0.361895 |
| 69 | 1 | 0 | 6.169474  | -1.772982 | 0.614522  |
| 70 | 1 | 0 | 5.269378  | 1.063075  | 1.009564  |
| 71 | 1 | 0 | 4.620307  | 2.290626  | 2.062537  |
| 72 | 1 | 0 | 2.725209  | 0.998309  | 1.752146  |
| 73 | 1 | 0 | 2.505023  | 2.300218  | 0.605079  |
| 74 | 8 | 0 | 3.683332  | -3.261924 | 1.852744  |
| 75 | 1 | 0 | 1.828825  | -3.879606 | 1.420735  |
| 76 | 6 | 0 | 0.776330  | -1.437152 | 2.959138  |
| 77 | 1 | 0 | 0.477031  | -0.792299 | 3.785785  |
| 78 | 1 | 0 | -0.038181 | -2.133126 | 2.742926  |
| 79 | 1 | 0 | 1.662784  | -1.999818 | 3.264394  |
| 80 | 6 | 0 | -4.920252 | -2.622158 | -1.119627 |
| 81 | 1 | 0 | -5.960886 | -2.465613 | -0.829463 |
| 82 | 1 | 0 | -4.893680 | -2.696551 | -2.209793 |
| 83 | 1 | 0 | -4.625797 | -3.589000 | -0.711281 |
| 84 | 1 | 0 | 6.403845  | 4.013323  | -1.890703 |
| 85 | 1 | 0 | 6.737315  | 4.935969  | -0.410859 |
| 86 | 1 | 0 | 7.939924  | 3.752263  | -1.009324 |

---



| Center<br>Number | Atomic<br>Number | Atomic<br>Type | Coordinates (Angstroms) |           |           |
|------------------|------------------|----------------|-------------------------|-----------|-----------|
|                  |                  |                | X                       | Y         | Z         |
| 1                | 6                | 0              | 1.154972                | 0.196670  | 1.189353  |
| 2                | 6                | 0              | -0.210662               | 0.914144  | 1.215326  |
| 3                | 1                | 0              | 1.225963                | -0.376826 | 2.114088  |
| 4                | 1                | 0              | 1.949681                | 0.946394  | 1.226641  |
| 5                | 1                | 0              | -0.280859               | 1.661126  | 0.423466  |
| 6                | 1                | 0              | -0.299569               | 1.446698  | 2.167124  |
| 7                | 6                | 0              | -3.593206               | -0.712994 | 0.355059  |
| 8                | 6                | 0              | -2.542939               | -1.706388 | -0.194581 |
| 9                | 6                | 0              | -1.251952               | -0.830715 | -0.291279 |
| 10               | 6                | 0              | -1.315394               | -0.128547 | 1.079563  |
| 11               | 6                | 0              | -3.035748               | -2.410748 | -1.441591 |
| 12               | 1                | 0              | -2.312110               | -2.491850 | 0.528327  |
| 13               | 8                | 0              | -1.375315               | 0.199433  | -1.290270 |
| 14               | 6                | 0              | 1.830132                | -3.039446 | -0.768681 |
| 15               | 6                | 0              | 2.414387                | -1.949718 | 0.183069  |
| 16               | 6                | 0              | 1.374630                | -0.735243 | -0.037351 |
| 17               | 6                | 0              | 0.089375                | -1.512910 | -0.401516 |
| 18               | 6                | 0              | 0.360105                | -2.746969 | -0.814235 |
| 19               | 1                | 0              | 2.262089                | -2.968881 | -1.775479 |
| 20               | 1                | 0              | 2.045417                | -4.051215 | -0.415023 |
| 21               | 6                | 0              | 2.321406                | -2.512531 | 1.615666  |
| 22               | 6                | 0              | 1.777637                | 0.145563  | -1.243775 |
| 23               | 1                | 0              | -0.375673               | -3.461465 | -1.160768 |
| 24               | 1                | 0              | 2.701482                | -1.824907 | 2.371566  |
| 25               | 1                | 0              | 1.288555                | -2.752933 | 1.874044  |
| 26               | 1                | 0              | 2.897227                | -3.436259 | 1.696063  |
| 27               | 1                | 0              | 1.006665                | 0.889194  | -1.440222 |
| 28               | 1                | 0              | 2.712506                | 0.677290  | -1.062799 |
| 29               | 1                | 0              | 1.902215                | -0.445161 | -2.153233 |
| 30               | 6                | 0              | 3.902214                | -1.635740 | -0.183787 |
| 31               | 6                | 0              | 4.565256                | -0.610516 | 0.762018  |
| 32               | 6                | 0              | 5.864535                | 0.002497  | 0.245189  |
| 33               | 6                | 0              | 6.476245                | 1.067361  | 1.174824  |
| 34               | 6                | 0              | 5.949169                | 2.391732  | 0.613481  |
| 35               | 6                | 0              | 5.659277                | 2.051730  | -0.845959 |
| 36               | 8                | 0              | 5.624806                | 0.704156  | -1.009574 |
| 37               | 1                | 0              | 6.587904                | -0.775997 | 0.006414  |
| 38               | 1                | 0              | 7.566660                | 1.044460  | 1.104471  |
| 39               | 1                | 0              | 6.206463                | 0.900842  | 2.218046  |
| 40               | 1                | 0              | 4.973654                | 2.624008  | 1.057101  |
| 41               | 6                | 0              | 6.859589                | 3.605465  | 0.769901  |
| 42               | 1                | 0              | 3.897220                | -1.198224 | -1.183818 |
| 43               | 1                | 0              | 4.798302                | -1.089429 | 1.719197  |
| 44               | 1                | 0              | 3.874037                | 0.204012  | 0.987777  |
| 45               | 8                | 0              | 5.469250                | 2.811579  | -1.753288 |
| 46               | 1                | 0              | 6.438555                | 4.467734  | 0.251902  |
| 47               | 1                | 0              | 6.985711                | 3.860854  | 1.824130  |
| 48               | 1                | 0              | 7.847656                | 3.408419  | 0.347212  |
| 49               | 1                | 0              | -1.050116               | -0.925449 | 1.783313  |
| 50               | 6                | 0              | -2.817218               | 0.196055  | 1.401163  |
| 51               | 6                | 0              | -3.077962               | -0.250950 | 2.853984  |

|    |   |   |           |           |           |
|----|---|---|-----------|-----------|-----------|
| 52 | 6 | 0 | -3.184633 | 1.703029  | 1.348801  |
| 53 | 1 | 0 | -4.102077 | -0.046829 | 3.171911  |
| 54 | 1 | 0 | -2.902937 | -1.320433 | 2.980814  |
| 55 | 1 | 0 | -2.408109 | 0.281110  | 3.536237  |
| 56 | 6 | 0 | -3.131101 | 2.467787  | -0.002200 |
| 57 | 6 | 0 | -4.476345 | 2.597208  | -0.673757 |
| 58 | 8 | 0 | -4.903809 | 1.883365  | -1.551036 |
| 59 | 8 | 0 | -5.185759 | 3.629025  | -0.163764 |
| 60 | 6 | 0 | -6.493415 | 3.832064  | -0.727456 |
| 61 | 6 | 0 | -4.887579 | -1.347933 | 0.832261  |
| 62 | 1 | 0 | -3.862245 | -0.066967 | -0.485378 |
| 63 | 6 | 0 | -5.010887 | -2.641559 | 1.130891  |
| 64 | 6 | 0 | -6.084736 | -0.433042 | 0.906954  |
| 65 | 1 | 0 | -5.963947 | -3.048662 | 1.448782  |
| 66 | 1 | 0 | -4.191223 | -3.345352 | 1.068772  |
| 67 | 1 | 0 | -6.976428 | -0.974200 | 1.225631  |
| 68 | 1 | 0 | -5.923267 | 0.389601  | 1.609795  |
| 69 | 1 | 0 | -6.281034 | 0.022180  | -0.067776 |
| 70 | 1 | 0 | -2.459246 | 1.974592  | -0.699502 |
| 71 | 1 | 0 | -2.763489 | 3.477509  | 0.187450  |
| 72 | 1 | 0 | -2.511244 | 2.213144  | 2.041951  |
| 73 | 1 | 0 | -4.178771 | 1.830518  | 1.784180  |
| 74 | 8 | 0 | -2.678795 | -3.509340 | -1.794675 |
| 75 | 1 | 0 | -3.797412 | -1.861279 | -2.030411 |
| 76 | 6 | 0 | -1.361923 | -0.190187 | -2.658344 |
| 77 | 1 | 0 | -1.036778 | 0.679818  | -3.229504 |
| 78 | 1 | 0 | -0.669815 | -1.015036 | -2.840699 |
| 79 | 1 | 0 | -2.362136 | -0.471533 | -3.000645 |
| 80 | 6 | 0 | 4.771102  | -2.905029 | -0.268083 |
| 81 | 1 | 0 | 5.769984  | -2.666966 | -0.638776 |
| 82 | 1 | 0 | 4.891888  | -3.385809 | 0.706067  |
| 83 | 1 | 0 | 4.352405  | -3.640588 | -0.954853 |
| 84 | 1 | 0 | -6.420743 | 4.014480  | -1.799207 |
| 85 | 1 | 0 | -7.123590 | 2.959593  | -0.556185 |
| 86 | 1 | 0 | -6.898417 | 4.702077  | -0.216788 |

---

| Center<br>Number | Atomic<br>Number | Atomic<br>Type | Coordinates (Angstroms) |           |           |
|------------------|------------------|----------------|-------------------------|-----------|-----------|
|                  |                  |                | X                       | Y         | Z         |
| 1                | 6                | 0              | -0.902839               | 0.191250  | -1.148359 |
| 2                | 6                | 0              | 0.479720                | 0.862054  | -1.033465 |
| 3                | 1                | 0              | -0.911437               | -0.363154 | -2.087520 |
| 4                | 1                | 0              | -1.666760               | 0.968000  | -1.237503 |
| 5                | 1                | 0              | 0.509072                | 1.566163  | -0.200984 |
| 6                | 1                | 0              | 0.663613                | 1.438783  | -1.945221 |
| 7                | 6                | 0              | 3.736079                | -1.044979 | -0.120670 |
| 8                | 6                | 0              | 2.576354                | -1.956548 | 0.372574  |
| 9                | 6                | 0              | 1.350663                | -0.989331 | 0.457461  |
| 10               | 6                | 0              | 1.545647                | -0.214922 | -0.861993 |
| 11               | 6                | 0              | 2.976004                | -2.729307 | 1.608867  |
| 12               | 1                | 0              | 2.313227                | -2.702577 | -0.378564 |
| 13               | 8                | 0              | 1.497678                | -0.023183 | 1.515610  |
| 14               | 6                | 0              | -1.859206               | -3.052359 | 0.668655  |
| 15               | 6                | 0              | -2.331067               | -1.908519 | -0.282068 |
| 16               | 6                | 0              | -1.251249               | -0.752730 | 0.036188  |
| 17               | 6                | 0              | -0.030257               | -1.599627 | 0.457747  |
| 18               | 6                | 0              | -0.383241               | -2.830718 | 0.814260  |
| 19               | 1                | 0              | -2.350150               | -2.989589 | 1.648671  |
| 20               | 1                | 0              | -2.098468               | -4.042323 | 0.271325  |
| 21               | 6                | 0              | -2.179670               | -2.432507 | -1.724412 |
| 22               | 6                | 0              | -1.687774               | 0.121208  | 1.236145  |
| 23               | 1                | 0              | 0.293673                | -3.591625 | 1.181842  |
| 24               | 1                | 0              | -2.482016               | -1.704342 | -2.477526 |
| 25               | 1                | 0              | -1.145843               | -2.715142 | -1.931061 |
| 26               | 1                | 0              | -2.791937               | -3.324401 | -1.868533 |
| 27               | 1                | 0              | -0.886361               | 0.804825  | 1.513073  |
| 28               | 1                | 0              | -2.569068               | 0.719837  | 1.002576  |
| 29               | 1                | 0              | -1.918733               | -0.483701 | 2.115154  |
| 30               | 6                | 0              | -3.820795               | -1.530966 | 0.005387  |
| 31               | 6                | 0              | -4.374953               | -0.450035 | -0.948833 |
| 32               | 6                | 0              | -5.625984               | 0.263669  | -0.462896 |
| 33               | 6                | 0              | -6.210156               | 1.287232  | -1.447901 |
| 34               | 6                | 0              | -6.802387               | 2.369257  | -0.536773 |
| 35               | 6                | 0              | -5.975501               | 2.225226  | 0.738881  |
| 36               | 8                | 0              | -5.310244               | 1.039812  | 0.729181  |
| 37               | 1                | 0              | -6.392098               | -0.456862 | -0.164414 |
| 38               | 1                | 0              | -6.944070               | 0.833123  | -2.115274 |
| 39               | 1                | 0              | -5.408007               | 1.701776  | -2.063854 |
| 40               | 1                | 0              | -6.638659               | 3.374587  | -0.927176 |
| 41               | 6                | 0              | -8.295647               | 2.195896  | -0.222644 |
| 42               | 1                | 0              | -3.853595               | -1.119957 | 1.016190  |
| 43               | 1                | 0              | -4.616846               | -0.900711 | -1.917964 |
| 44               | 1                | 0              | -3.624518               | 0.317243  | -1.145517 |
| 45               | 8                | 0              | -5.894959               | 2.996699  | 1.652352  |
| 46               | 1                | 0              | -8.617575               | 2.926033  | 0.521003  |
| 47               | 1                | 0              | -8.890361               | 2.338981  | -1.127100 |
| 48               | 1                | 0              | -8.510613               | 1.198212  | 0.168501  |
| 49               | 1                | 0              | 1.351177                | -0.962714 | -1.640755 |
| 50               | 6                | 0              | 3.062926                | 0.118292  | -0.986055 |
| 51               | 6                | 0              | 3.468514                | 0.129188  | -2.469229 |

|    |   |   |           |           |           |
|----|---|---|-----------|-----------|-----------|
| 52 | 6 | 0 | 3.385390  | 1.505013  | -0.369503 |
| 53 | 1 | 0 | 4.551189  | 0.155776  | -2.598000 |
| 54 | 1 | 0 | 3.093723  | -0.745366 | -3.002223 |
| 55 | 1 | 0 | 3.053534  | 1.011356  | -2.964931 |
| 56 | 6 | 0 | 4.855861  | 1.957547  | -0.479074 |
| 57 | 6 | 0 | 5.065996  | 3.243374  | 0.282507  |
| 58 | 8 | 0 | 5.427264  | 3.321689  | 1.431302  |
| 59 | 8 | 0 | 4.768240  | 4.324623  | -0.473259 |
| 60 | 6 | 0 | 4.890208  | 5.597267  | 0.185907  |
| 61 | 6 | 0 | 4.884446  | -1.836299 | -0.730133 |
| 62 | 1 | 0 | 4.142000  | -0.556772 | 0.768330  |
| 63 | 6 | 0 | 6.140782  | -1.612615 | -0.343278 |
| 64 | 6 | 0 | 4.582274  | -2.936553 | -1.720178 |
| 65 | 1 | 0 | 6.969891  | -2.174585 | -0.758123 |
| 66 | 1 | 0 | 6.387206  | -0.870207 | 0.407032  |
| 67 | 1 | 0 | 5.498411  | -3.293298 | -2.192006 |
| 68 | 1 | 0 | 4.114211  | -3.791844 | -1.223112 |
| 69 | 1 | 0 | 3.898487  | -2.615928 | -2.507518 |
| 70 | 1 | 0 | 5.137979  | 2.111546  | -1.520946 |
| 71 | 1 | 0 | 5.524827  | 1.218000  | -0.042414 |
| 72 | 1 | 0 | 3.093235  | 1.499572  | 0.680196  |
| 73 | 1 | 0 | 2.766737  | 2.256535  | -0.867466 |
| 74 | 8 | 0 | 2.631863  | -3.861467 | 1.851203  |
| 75 | 1 | 0 | 3.666817  | -2.203106 | 2.298790  |
| 76 | 6 | 0 | 1.294109  | -0.451487 | 2.855306  |
| 77 | 1 | 0 | 0.436277  | -1.120519 | 2.947976  |
| 78 | 1 | 0 | 2.179861  | -0.950869 | 3.260335  |
| 79 | 1 | 0 | 1.110563  | 0.448667  | 3.442038  |
| 80 | 6 | 0 | -4.753349 | -2.757086 | 0.000035  |
| 81 | 1 | 0 | -5.768261 | -2.473639 | 0.286723  |
| 82 | 1 | 0 | -4.813974 | -3.221307 | -0.987421 |
| 83 | 1 | 0 | -4.430108 | -3.519261 | 0.709135  |
| 84 | 1 | 0 | 4.615468  | 6.339314  | -0.559529 |
| 85 | 1 | 0 | 4.219914  | 5.647466  | 1.043713  |
| 86 | 1 | 0 | 5.914242  | 5.753313  | 0.524216  |

---

| Center<br>Number | Atomic<br>Number | Atomic<br>Type | Coordinates (Angstroms) |           |           |
|------------------|------------------|----------------|-------------------------|-----------|-----------|
|                  |                  |                | X                       | Y         | Z         |
| 1                | 6                | 0              | -0.960669               | 0.216038  | -1.156768 |
| 2                | 6                | 0              | 0.435484                | 0.859981  | -1.054188 |
| 3                | 1                | 0              | -0.982697               | -0.352123 | -2.087516 |
| 4                | 1                | 0              | -1.708646               | 1.006875  | -1.256630 |
| 5                | 1                | 0              | 0.482301                | 1.578227  | -0.234895 |
| 6                | 1                | 0              | 0.630339                | 1.417403  | -1.975498 |
| 7                | 6                | 0              | 3.653017                | -1.092604 | -0.110954 |
| 8                | 6                | 0              | 2.477562                | -1.976597 | 0.395062  |
| 9                | 6                | 0              | 1.270853                | -0.984344 | 0.466331  |
| 10               | 6                | 0              | 1.478483                | -0.236318 | -0.866442 |
| 11               | 6                | 0              | 2.863407                | -2.736517 | 1.642853  |
| 12               | 1                | 0              | 2.200408                | -2.728947 | -0.344551 |
| 13               | 8                | 0              | 1.440342                | -0.006389 | 1.510471  |
| 14               | 6                | 0              | -1.978923               | -2.979841 | 0.712067  |
| 15               | 6                | 0              | -2.428452               | -1.842393 | -0.257196 |
| 16               | 6                | 0              | -1.326585               | -0.702643 | 0.042595  |
| 17               | 6                | 0              | -0.121942               | -1.566722 | 0.477657  |
| 18               | 6                | 0              | -0.498873               | -2.784617 | 0.854331  |
| 19               | 1                | 0              | -2.468781               | -2.891495 | 1.690683  |
| 20               | 1                | 0              | -2.237361               | -3.971204 | 0.330536  |
| 21               | 6                | 0              | -2.286947               | -2.392408 | -1.690812 |
| 22               | 6                | 0              | -1.744473               | 0.198200  | 1.229184  |
| 23               | 1                | 0              | 0.162833                | -3.552774 | 1.234262  |
| 24               | 1                | 0              | -2.577864               | -1.671860 | -2.455674 |
| 25               | 1                | 0              | -1.257964               | -2.694960 | -1.893379 |
| 26               | 1                | 0              | -2.913866               | -3.276443 | -1.819895 |
| 27               | 1                | 0              | -0.930914               | 0.872931  | 1.492476  |
| 28               | 1                | 0              | -2.615802               | 0.808304  | 0.988159  |
| 29               | 1                | 0              | -1.984113               | -0.388172 | 2.118365  |
| 30               | 6                | 0              | -3.910349               | -1.431901 | 0.024810  |
| 31               | 6                | 0              | -4.441464               | -0.349167 | -0.939898 |
| 32               | 6                | 0              | -5.693675               | 0.376045  | -0.474331 |
| 33               | 6                | 0              | -6.240483               | 1.419858  | -1.459526 |
| 34               | 6                | 0              | -6.842345               | 2.496653  | -0.548381 |
| 35               | 6                | 0              | -6.051164               | 2.323961  | 0.746320  |
| 36               | 8                | 0              | -5.396966               | 1.132347  | 0.735010  |
| 37               | 1                | 0              | -6.476600               | -0.337578 | -0.204254 |
| 38               | 1                | 0              | -6.963001               | 0.984020  | -2.151101 |
| 39               | 1                | 0              | -5.418214               | 1.832744  | -2.049437 |
| 40               | 1                | 0              | -6.655499               | 3.505083  | -0.919911 |
| 41               | 6                | 0              | -8.345388               | 2.338669  | -0.275594 |
| 42               | 1                | 0              | -3.934910               | -1.009591 | 1.031215  |
| 43               | 1                | 0              | -4.673436               | -0.799299 | -1.911730 |
| 44               | 1                | 0              | -3.681099               | 0.410662  | -1.126916 |
| 45               | 8                | 0              | -5.988508               | 3.079578  | 1.674261  |
| 46               | 1                | 0              | -8.677392               | 3.063349  | 0.468962  |
| 47               | 1                | 0              | -8.914401               | 2.500835  | -1.193275 |
| 48               | 1                | 0              | -8.582992               | 1.338952  | 0.096884  |
| 49               | 1                | 0              | 1.265348                | -0.993946 | -1.630712 |
| 50               | 6                | 0              | 3.001327                | 0.064528  | -1.001109 |
| 51               | 6                | 0              | 3.400682                | 0.026492  | -2.486214 |

|    |   |   |           |           |           |
|----|---|---|-----------|-----------|-----------|
| 52 | 6 | 0 | 3.349672  | 1.462573  | -0.426788 |
| 53 | 1 | 0 | 4.482976  | 0.030685  | -2.621583 |
| 54 | 1 | 0 | 3.009252  | -0.855893 | -2.993970 |
| 55 | 1 | 0 | 2.997075  | 0.901285  | -3.003744 |
| 56 | 6 | 0 | 4.822525  | 1.867879  | -0.503414 |
| 57 | 6 | 0 | 5.062847  | 3.273138  | 0.002797  |
| 58 | 8 | 0 | 4.221811  | 4.121196  | 0.167694  |
| 59 | 8 | 0 | 6.378613  | 3.483666  | 0.236109  |
| 60 | 6 | 0 | 6.728361  | 4.806855  | 0.678437  |
| 61 | 6 | 0 | 4.792260  | -1.910729 | -0.701526 |
| 62 | 1 | 0 | 4.061571  | -0.594289 | 0.771448  |
| 63 | 6 | 0 | 6.052424  | -1.688020 | -0.326825 |
| 64 | 6 | 0 | 4.477063  | -3.032048 | -1.663275 |
| 65 | 1 | 0 | 6.875049  | -2.266829 | -0.731194 |
| 66 | 1 | 0 | 6.309227  | -0.927276 | 0.401242  |
| 67 | 1 | 0 | 5.388444  | -3.409072 | -2.128527 |
| 68 | 1 | 0 | 4.001774  | -3.870192 | -1.144407 |
| 69 | 1 | 0 | 3.794435  | -2.723384 | -2.456356 |
| 70 | 1 | 0 | 5.195843  | 1.845695  | -1.532196 |
| 71 | 1 | 0 | 5.471716  | 1.194490  | 0.057677  |
| 72 | 1 | 0 | 3.020362  | 1.514846  | 0.610435  |
| 73 | 1 | 0 | 2.768425  | 2.213744  | -0.965802 |
| 74 | 8 | 0 | 2.509477  | -3.862702 | 1.898651  |
| 75 | 1 | 0 | 3.554524  | -2.206765 | 2.330192  |
| 76 | 6 | 0 | 1.217975  | -0.407794 | 2.855054  |
| 77 | 1 | 0 | 1.050469  | 0.505759  | 3.425853  |
| 78 | 1 | 0 | 0.344726  | -1.055669 | 2.953166  |
| 79 | 1 | 0 | 2.088924  | -0.921571 | 3.274713  |
| 80 | 6 | 0 | -4.866743 | -2.639516 | 0.032590  |
| 81 | 1 | 0 | -5.872846 | -2.335797 | 0.328777  |
| 82 | 1 | 0 | -4.946144 | -3.106201 | -0.952447 |
| 83 | 1 | 0 | -4.550785 | -3.405353 | 0.741004  |
| 84 | 1 | 0 | 6.230118  | 5.037936  | 1.619634  |
| 85 | 1 | 0 | 7.807472  | 4.794146  | 0.809294  |
| 86 | 1 | 0 | 6.440756  | 5.547015  | -0.068014 |

---

| Center<br>Number | Atomic<br>Number | Atomic<br>Type | Coordinates (Angstroms) |           |           |
|------------------|------------------|----------------|-------------------------|-----------|-----------|
|                  |                  |                | X                       | Y         | Z         |
| 1                | 6                | 0              | -0.923725               | 0.021682  | -1.165718 |
| 2                | 6                | 0              | 0.440622                | 0.741014  | -1.154559 |
| 3                | 1                | 0              | -0.965304               | -0.558945 | -2.087746 |
| 4                | 1                | 0              | -1.718436               | 0.769163  | -1.233159 |
| 5                | 1                | 0              | 0.485619                | 1.491678  | -0.365009 |
| 6                | 1                | 0              | 0.561216                | 1.271006  | -2.103596 |
| 7                | 6                | 0              | 3.794520                | -0.884867 | -0.193851 |
| 8                | 6                | 0              | 2.731308                | -1.883233 | 0.332199  |
| 9                | 6                | 0              | 1.441352                | -0.995236 | 0.391596  |
| 10               | 6                | 0              | 1.540272                | -0.301434 | -0.981969 |
| 11               | 6                | 0              | 3.184592                | -2.572374 | 1.597929  |
| 12               | 1                | 0              | 2.525013                | -2.674836 | -0.391273 |
| 13               | 8                | 0              | 1.557055                | 0.040694  | 1.386678  |
| 14               | 6                | 0              | -1.650985               | -3.203085 | 0.794205  |
| 15               | 6                | 0              | -2.208790               | -2.120103 | -0.181115 |
| 16               | 6                | 0              | -1.178893               | -0.901336 | 0.061243  |
| 17               | 6                | 0              | 0.096411                | -1.673340 | 0.471781  |
| 18               | 6                | 0              | -0.184135               | -2.905487 | 0.883873  |
| 19               | 1                | 0              | -2.114713               | -3.129180 | 1.786597  |
| 20               | 1                | 0              | -1.851619               | -4.217329 | 0.439200  |
| 21               | 6                | 0              | -2.072912               | -2.690417 | -1.607231 |
| 22               | 6                | 0              | -1.620520               | -0.011882 | 1.247580  |
| 23               | 1                | 0              | 0.540970                | -3.618744 | 1.255235  |
| 24               | 1                | 0              | -2.435768               | -2.008641 | -2.376668 |
| 25               | 1                | 0              | -1.032120               | -2.926346 | -1.836316 |
| 26               | 1                | 0              | -2.641355               | -3.617599 | -1.698352 |
| 27               | 1                | 0              | -0.858412               | 0.736283  | 1.461154  |
| 28               | 1                | 0              | -2.549855               | 0.516403  | 1.033112  |
| 29               | 1                | 0              | -1.773526               | -0.594766 | 2.157667  |
| 30               | 6                | 0              | -3.707473               | -1.808525 | 0.140961  |
| 31               | 6                | 0              | -4.343693               | -0.782024 | -0.821588 |
| 32               | 6                | 0              | -5.659167               | -0.173291 | -0.341210 |
| 33               | 6                | 0              | -6.238664               | 0.902530  | -1.278644 |
| 34               | 6                | 0              | -5.728732               | 2.219950  | -0.685532 |
| 35               | 6                | 0              | -5.488415               | 1.863627  | 0.778870  |
| 36               | 8                | 0              | -5.460317               | 0.513952  | 0.928460  |
| 37               | 1                | 0              | -6.390462               | -0.953751 | -0.134945 |
| 38               | 1                | 0              | -7.330815               | 0.880543  | -1.244505 |
| 39               | 1                | 0              | -5.934782               | 0.747202  | -2.314188 |
| 40               | 1                | 0              | -4.738503               | 2.455160  | -1.093509 |
| 41               | 6                | 0              | -6.631463               | 3.437062  | -0.859192 |
| 42               | 1                | 0              | -3.732963               | -1.373285 | 1.141598  |
| 43               | 1                | 0              | -4.546947               | -1.257898 | -1.787031 |
| 44               | 1                | 0              | -3.647976               | 0.034685  | -1.023886 |
| 45               | 8                | 0              | -5.328140               | 2.612441  | 1.700921  |
| 46               | 1                | 0              | -6.226173               | 4.292967  | -0.318615 |
| 47               | 1                | 0              | -6.722004               | 3.703802  | -1.914216 |
| 48               | 1                | 0              | -7.633306               | 3.237645  | -0.471466 |
| 49               | 1                | 0              | 1.289603                | -1.103504 | -1.685531 |
| 50               | 6                | 0              | 3.047172                | 0.014720  | -1.266234 |
| 51               | 6                | 0              | 3.347221                | -0.408895 | -2.718459 |

|    |   |   |           |           |           |
|----|---|---|-----------|-----------|-----------|
| 52 | 6 | 0 | 3.461005  | 1.505336  | -1.185873 |
| 53 | 1 | 0 | 4.403969  | -0.287962 | -2.963852 |
| 54 | 1 | 0 | 3.068260  | -1.446614 | -2.907840 |
| 55 | 1 | 0 | 2.773830  | 0.213365  | -3.411266 |
| 56 | 6 | 0 | 3.400385  | 2.235722  | 0.156500  |
| 57 | 6 | 0 | 3.560091  | 3.731535  | 0.001443  |
| 58 | 8 | 0 | 3.396810  | 4.363703  | -1.013228 |
| 59 | 8 | 0 | 3.891029  | 4.306083  | 1.180268  |
| 60 | 6 | 0 | 4.010377  | 5.739239  | 1.162876  |
| 61 | 6 | 0 | 5.122132  | -1.499255 | -0.607579 |
| 62 | 1 | 0 | 4.015682  | -0.227648 | 0.648057  |
| 63 | 6 | 0 | 6.261556  | -0.858553 | -0.341945 |
| 64 | 6 | 0 | 5.144624  | -2.847910 | -1.284670 |
| 65 | 1 | 0 | 7.222784  | -1.263675 | -0.637046 |
| 66 | 1 | 0 | 6.274979  | 0.092068  | 0.179393  |
| 67 | 1 | 0 | 6.161240  | -3.115748 | -1.574728 |
| 68 | 1 | 0 | 4.773121  | -3.632225 | -0.618169 |
| 69 | 1 | 0 | 4.520619  | -2.875479 | -2.180267 |
| 70 | 1 | 0 | 4.164691  | 1.892457  | 0.856076  |
| 71 | 1 | 0 | 2.449311  | 2.067050  | 0.665902  |
| 72 | 1 | 0 | 2.851902  | 2.063014  | -1.900406 |
| 73 | 1 | 0 | 4.485153  | 1.581543  | -1.565579 |
| 74 | 8 | 0 | 2.908064  | -3.709759 | 1.897152  |
| 75 | 1 | 0 | 3.850514  | -1.977916 | 2.256035  |
| 76 | 6 | 0 | 1.433136  | -0.322355 | 2.755702  |
| 77 | 1 | 0 | 2.384534  | -0.675238 | 3.166260  |
| 78 | 1 | 0 | 1.140783  | 0.579841  | 3.293672  |
| 79 | 1 | 0 | 0.672595  | -1.090353 | 2.909475  |
| 80 | 6 | 0 | -4.576458 | -3.079514 | 0.196240  |
| 81 | 1 | 0 | -5.585813 | -2.843883 | 0.538866  |
| 82 | 1 | 0 | -4.668390 | -3.556758 | -0.782707 |
| 83 | 1 | 0 | -4.176868 | -3.817203 | 0.892116  |
| 84 | 1 | 0 | 4.272547  | 6.021727  | 2.179349  |
| 85 | 1 | 0 | 4.788625  | 6.048307  | 0.465503  |
| 86 | 1 | 0 | 3.066024  | 6.196887  | 0.868817  |

---



| Center<br>Number | Atomic<br>Number | Atomic<br>Type | Coordinates (Angstroms) |           |           |
|------------------|------------------|----------------|-------------------------|-----------|-----------|
|                  |                  |                | X                       | Y         | Z         |
| 1                | 6                | 0              | -0.846123               | 0.142324  | -1.045702 |
| 2                | 6                | 0              | 0.517133                | 0.823684  | -0.815777 |
| 3                | 1                | 0              | -0.820124               | -0.289844 | -2.046783 |
| 4                | 1                | 0              | -1.626523               | 0.907927  | -1.057971 |
| 5                | 1                | 0              | 0.510604                | 1.422987  | 0.096194  |
| 6                | 1                | 0              | 0.696931                | 1.506300  | -1.650515 |
| 7                | 6                | 0              | 3.785110                | -1.088398 | 0.018165  |
| 8                | 6                | 0              | 2.649330                | -2.104965 | 0.287666  |
| 9                | 6                | 0              | 1.394247                | -1.183280 | 0.449215  |
| 10               | 6                | 0              | 1.612035                | -0.238274 | -0.750478 |
| 11               | 6                | 0              | 3.006752                | -3.042899 | 1.417503  |
| 12               | 1                | 0              | 2.449942                | -2.735401 | -0.580867 |
| 13               | 8                | 0              | 1.482165                | -0.351985 | 1.623652  |
| 14               | 6                | 0              | -1.764051               | -3.328626 | 0.301181  |
| 15               | 6                | 0              | -2.250202               | -2.074381 | -0.489969 |
| 16               | 6                | 0              | -1.199918               | -0.951195 | -0.000889 |
| 17               | 6                | 0              | 0.031566                | -1.820358 | 0.331061  |
| 18               | 6                | 0              | -0.297156               | -3.096529 | 0.506134  |
| 19               | 1                | 0              | -2.271309               | -3.414983 | 1.270731  |
| 20               | 1                | 0              | -1.971226               | -4.258163 | -0.235629 |
| 21               | 6                | 0              | -2.068059               | -2.393349 | -1.987748 |
| 22               | 6                | 0              | -1.678401               | -0.250290 | 1.292743  |
| 23               | 1                | 0              | 0.391454                | -3.886024 | 0.778917  |
| 24               | 1                | 0              | -2.373076               | -1.573779 | -2.638849 |
| 25               | 1                | 0              | -1.025921               | -2.626854 | -2.213791 |
| 26               | 1                | 0              | -2.659967               | -3.267920 | -2.263669 |
| 27               | 1                | 0              | -0.903167               | 0.414781  | 1.669996  |
| 28               | 1                | 0              | -2.574108               | 0.348097  | 1.122029  |
| 29               | 1                | 0              | -1.906830               | -0.968513 | 2.082390  |
| 30               | 6                | 0              | -3.752008               | -1.771968 | -0.174925 |
| 31               | 6                | 0              | -4.320830               | -0.579609 | -0.974777 |
| 32               | 6                | 0              | -5.641794               | -0.020518 | -0.450730 |
| 33               | 6                | 0              | -6.155037               | 1.213408  | -1.216603 |
| 34               | 6                | 0              | -5.642668               | 2.397574  | -0.390658 |
| 35               | 6                | 0              | -5.475055               | 1.794907  | 1.001371  |
| 36               | 8                | 0              | -5.483305               | 0.439006  | 0.922937  |
| 37               | 1                | 0              | -6.399084               | -0.802150 | -0.408195 |
| 38               | 1                | 0              | -7.247865               | 1.218046  | -1.230675 |
| 39               | 1                | 0              | -5.808970               | 1.224313  | -2.250518 |
| 40               | 1                | 0              | -4.630281               | 2.668316  | -0.713621 |
| 41               | 6                | 0              | -6.509459               | 3.652582  | -0.392473 |
| 42               | 1                | 0              | -3.806206               | -1.505956 | 0.882265  |
| 43               | 1                | 0              | -4.492849               | -0.880373 | -2.013896 |
| 44               | 1                | 0              | -3.597499               | 0.237854  | -1.008544 |
| 45               | 8                | 0              | -5.339334               | 2.374563  | 2.041612  |
| 46               | 1                | 0              | -6.108855               | 4.393863  | 0.299697  |
| 47               | 1                | 0              | -6.548366               | 4.094149  | -1.390449 |
| 48               | 1                | 0              | -7.531307               | 3.420949  | -0.082832 |
| 49               | 1                | 0              | 1.456007                | -0.881318 | -1.625605 |
| 50               | 6                | 0              | 3.129448                | 0.127370  | -0.788013 |
| 51               | 6                | 0              | 3.589698                | 0.208053  | -2.251550 |

|    |   |   |           |           |           |
|----|---|---|-----------|-----------|-----------|
| 52 | 6 | 0 | 3.545468  | 1.420512  | -0.035333 |
| 53 | 1 | 0 | 4.656819  | 0.427622  | -2.328078 |
| 54 | 1 | 0 | 3.398189  | -0.722954 | -2.786065 |
| 55 | 1 | 0 | 3.046772  | 0.992458  | -2.783995 |
| 56 | 6 | 0 | 3.232847  | 2.769175  | -0.687887 |
| 57 | 6 | 0 | 3.822258  | 3.928263  | 0.087445  |
| 58 | 8 | 0 | 4.658264  | 3.852843  | 0.952863  |
| 59 | 8 | 0 | 3.298694  | 5.102379  | -0.332748 |
| 60 | 6 | 0 | 3.817410  | 6.280831  | 0.308646  |
| 61 | 6 | 0 | 5.065436  | -1.688999 | -0.537695 |
| 62 | 1 | 0 | 4.046617  | -0.672727 | 0.993349  |
| 63 | 6 | 0 | 6.248428  | -1.259028 | -0.095876 |
| 64 | 6 | 0 | 4.989383  | -2.804874 | -1.551557 |
| 65 | 1 | 0 | 7.178080  | -1.660834 | -0.482899 |
| 66 | 1 | 0 | 6.329480  | -0.493749 | 0.667538  |
| 67 | 1 | 0 | 5.982122  | -3.047935 | -1.931986 |
| 68 | 1 | 0 | 4.574831  | -3.713931 | -1.104887 |
| 69 | 1 | 0 | 4.353393  | -2.556986 | -2.403950 |
| 70 | 1 | 0 | 2.164195  | 2.953773  | -0.794683 |
| 71 | 1 | 0 | 3.651345  | 2.836903  | -1.696929 |
| 72 | 1 | 0 | 4.628370  | 1.377699  | 0.107678  |
| 73 | 1 | 0 | 3.107710  | 1.399035  | 0.963062  |
| 74 | 8 | 0 | 2.705061  | -4.211993 | 1.460318  |
| 75 | 1 | 0 | 3.625924  | -2.605317 | 2.226623  |
| 76 | 6 | 0 | 1.272173  | -0.954968 | 2.893684  |
| 77 | 1 | 0 | 0.944084  | -0.162859 | 3.567292  |
| 78 | 1 | 0 | 0.505608  | -1.731993 | 2.858170  |
| 79 | 1 | 0 | 2.197427  | -1.383457 | 3.291793  |
| 80 | 6 | 0 | -4.654920 | -3.005667 | -0.364582 |
| 81 | 1 | 0 | -5.670451 | -2.799651 | -0.021228 |
| 82 | 1 | 0 | -4.720601 | -3.308886 | -1.412550 |
| 83 | 1 | 0 | -4.300197 | -3.861471 | 0.209520  |
| 84 | 1 | 0 | 4.891476  | 6.363488  | 0.143446  |
| 85 | 1 | 0 | 3.293903  | 7.115899  | -0.149984 |
| 86 | 1 | 0 | 3.622881  | 6.248024  | 1.380328  |

---

| Center<br>Number | Atomic<br>Number | Atomic<br>Type | Coordinates (Angstroms) |           |           |
|------------------|------------------|----------------|-------------------------|-----------|-----------|
|                  |                  |                | X                       | Y         | Z         |
| 1                | 6                | 0              | -0.970113               | -0.053450 | -1.185439 |
| 2                | 6                | 0              | 0.400815                | 0.650093  | -1.205051 |
| 3                | 1                | 0              | -1.022532               | -0.666276 | -2.085728 |
| 4                | 1                | 0              | -1.757999               | 0.698878  | -1.275781 |
| 5                | 1                | 0              | 0.458473                | 1.427549  | -0.442825 |
| 6                | 1                | 0              | 0.522221                | 1.144238  | -2.173064 |
| 7                | 6                | 0              | 3.757973                | -1.004475 | -0.252392 |
| 8                | 6                | 0              | 2.686359                | -1.924904 | 0.369492  |
| 9                | 6                | 0              | 1.396203                | -1.038795 | 0.397524  |
| 10               | 6                | 0              | 1.492087                | -0.394129 | -0.999275 |
| 11               | 6                | 0              | 3.124806                | -2.557539 | 1.670941  |
| 12               | 1                | 0              | 2.446657                | -2.763504 | -0.294458 |
| 13               | 8                | 0              | 1.514010                | 0.032264  | 1.352551  |
| 14               | 6                | 0              | -1.732768               | -3.196266 | 0.887296  |
| 15               | 6                | 0              | -2.278476               | -2.139018 | -0.121662 |
| 16               | 6                | 0              | -1.228564               | -0.928844 | 0.074147  |
| 17               | 6                | 0              | 0.041514                | -1.701593 | 0.504238  |
| 18               | 6                | 0              | -0.262262               | -2.913295 | 0.958097  |
| 19               | 1                | 0              | -2.190535               | -3.082142 | 1.878443  |
| 20               | 1                | 0              | -1.948609               | -4.218816 | 0.566610  |
| 21               | 6                | 0              | -2.158577               | -2.760169 | -1.528009 |
| 22               | 6                | 0              | -1.648988               | 0.004873  | 1.233709  |
| 23               | 1                | 0              | 0.443473                | -3.632199 | 1.355723  |
| 24               | 1                | 0              | -2.515748               | -2.099880 | -2.318366 |
| 25               | 1                | 0              | -1.122284               | -3.017360 | -1.754905 |
| 26               | 1                | 0              | -2.740244               | -3.681994 | -1.584708 |
| 27               | 1                | 0              | -0.875814               | 0.749129  | 1.418281  |
| 28               | 1                | 0              | -2.572833               | 0.537320  | 1.006766  |
| 29               | 1                | 0              | -1.803865               | -0.546232 | 2.163085  |
| 30               | 6                | 0              | -3.770181               | -1.793945 | 0.198605  |
| 31               | 6                | 0              | -4.396218               | -0.790407 | -0.793794 |
| 32               | 6                | 0              | -5.710502               | -0.161513 | -0.336010 |
| 33               | 6                | 0              | -6.266411               | 0.908909  | -1.293606 |
| 34               | 6                | 0              | -5.748773               | 2.227712  | -0.710138 |
| 35               | 6                | 0              | -5.531913               | 1.886974  | 0.761573  |
| 36               | 8                | 0              | -5.519293               | 0.538468  | 0.927386  |
| 37               | 1                | 0              | -6.452736               | -0.931567 | -0.129772 |
| 38               | 1                | 0              | -7.359048               | 0.899534  | -1.272616 |
| 39               | 1                | 0              | -5.951753               | 0.737662  | -2.323423 |
| 40               | 1                | 0              | -4.750329               | 2.445732  | -1.107563 |
| 41               | 6                | 0              | -6.634229               | 3.453222  | -0.911152 |
| 42               | 1                | 0              | -3.782050               | -1.323776 | 1.183630  |
| 43               | 1                | 0              | -4.598024               | -1.289514 | -1.747707 |
| 44               | 1                | 0              | -3.694314               | 0.016396  | -1.013469 |
| 45               | 8                | 0              | -5.376349               | 2.644630  | 1.676927  |
| 46               | 1                | 0              | -6.225683               | 4.310942  | -0.375956 |
| 47               | 1                | 0              | -6.707431               | 3.707641  | -1.970536 |
| 48               | 1                | 0              | -7.643483               | 3.270879  | -0.534429 |
| 49               | 1                | 0              | 1.238481                | -1.219802 | -1.674919 |
| 50               | 6                | 0              | 2.996914                | -0.086155 | -1.304603 |
| 51               | 6                | 0              | 3.258451                | -0.517464 | -2.761669 |

|    |   |   |           |           |           |
|----|---|---|-----------|-----------|-----------|
| 52 | 6 | 0 | 3.401871  | 1.409443  | -1.235388 |
| 53 | 1 | 0 | 4.292497  | -0.341433 | -3.062697 |
| 54 | 1 | 0 | 3.049793  | -1.577397 | -2.914006 |
| 55 | 1 | 0 | 2.615117  | 0.053598  | -3.437625 |
| 56 | 6 | 0 | 3.401763  | 2.132979  | 0.110846  |
| 57 | 6 | 0 | 3.635821  | 3.618659  | -0.040131 |
| 58 | 8 | 0 | 3.577333  | 4.249532  | -1.067356 |
| 59 | 8 | 0 | 3.907172  | 4.187427  | 1.156722  |
| 60 | 6 | 0 | 4.104132  | 5.611444  | 1.139722  |
| 61 | 6 | 0 | 5.005697  | -1.708529 | -0.757690 |
| 62 | 1 | 0 | 4.086882  | -0.357368 | 0.561631  |
| 63 | 6 | 0 | 5.021036  | -2.951096 | -1.235516 |
| 64 | 6 | 0 | 6.275695  | -0.903043 | -0.667833 |
| 65 | 1 | 0 | 5.941847  | -3.403908 | -1.584334 |
| 66 | 1 | 0 | 4.134683  | -3.571127 | -1.296629 |
| 67 | 1 | 0 | 7.126956  | -1.445211 | -1.081319 |
| 68 | 1 | 0 | 6.188474  | 0.049361  | -1.199665 |
| 69 | 1 | 0 | 6.494936  | -0.662474 | 0.377328  |
| 70 | 1 | 0 | 4.162053  | 1.747548  | 0.793237  |
| 71 | 1 | 0 | 2.455294  | 2.004693  | 0.638849  |
| 72 | 1 | 0 | 2.755653  | 1.965089  | -1.918585 |
| 73 | 1 | 0 | 4.403335  | 1.502628  | -1.665803 |
| 74 | 8 | 0 | 4.152828  | -2.305218 | 2.249160  |
| 75 | 1 | 0 | 2.436856  | -3.321648 | 2.087026  |
| 76 | 6 | 0 | 1.412052  | -0.275361 | 2.740002  |
| 77 | 1 | 0 | 2.367198  | -0.610520 | 3.148219  |
| 78 | 1 | 0 | 1.123830  | 0.649537  | 3.240431  |
| 79 | 1 | 0 | 0.646695  | -1.030661 | 2.934399  |
| 80 | 6 | 0 | -4.657714 | -3.048688 | 0.304205  |
| 81 | 1 | 0 | -5.658399 | -2.786338 | 0.652371  |
| 82 | 1 | 0 | -4.770337 | -3.555333 | -0.657714 |
| 83 | 1 | 0 | -4.260778 | -3.770603 | 1.018012  |
| 84 | 1 | 0 | 4.306932  | 5.889552  | 2.170914  |
| 85 | 1 | 0 | 4.946300  | 5.872407  | 0.499146  |
| 86 | 1 | 0 | 3.209573  | 6.116179  | 0.775158  |

---

| Center<br>Number | Atomic<br>Number | Atomic<br>Type | Coordinates (Angstroms) |           |           |
|------------------|------------------|----------------|-------------------------|-----------|-----------|
|                  |                  |                | X                       | Y         | Z         |
| 1                | 6                | 0              | -1.093964               | 0.133266  | -1.141612 |
| 2                | 6                | 0              | 0.299343                | 0.784274  | -1.060439 |
| 3                | 1                | 0              | -1.121107               | -0.447788 | -2.064112 |
| 4                | 1                | 0              | -1.848710               | 0.917074  | -1.246812 |
| 5                | 1                | 0              | 0.350676                | 1.515799  | -0.253479 |
| 6                | 1                | 0              | 0.484971                | 1.326419  | -1.992408 |
| 7                | 6                | 0              | 3.543651                | -1.178345 | -0.187588 |
| 8                | 6                | 0              | 2.386153                | -1.992683 | 0.448830  |
| 9                | 6                | 0              | 1.159196                | -1.023461 | 0.489861  |
| 10               | 6                | 0              | 1.348129                | -0.304419 | -0.861649 |
| 11               | 6                | 0              | 2.775914                | -2.686229 | 1.734323  |
| 12               | 1                | 0              | 2.071034                | -2.804046 | -0.217140 |
| 13               | 8                | 0              | 1.301265                | -0.016368 | 1.508351  |
| 14               | 6                | 0              | -2.088665               | -3.039454 | 0.776115  |
| 15               | 6                | 0              | -2.544545               | -1.918326 | -0.208703 |
| 16               | 6                | 0              | -1.445673               | -0.771347 | 0.072047  |
| 17               | 6                | 0              | -0.231145               | -1.620819 | 0.514437  |
| 18               | 6                | 0              | -0.609720               | -2.832174 | 0.909562  |
| 19               | 1                | 0              | -2.577677               | -2.939303 | 1.753807  |
| 20               | 1                | 0              | -2.341509               | -4.037367 | 0.408367  |
| 21               | 6                | 0              | -2.404205               | -2.490662 | -1.633657 |
| 22               | 6                | 0              | -1.858120               | 0.138256  | 1.253827  |
| 23               | 1                | 0              | 0.045225                | -3.599375 | 1.303702  |
| 24               | 1                | 0              | -2.699803               | -1.783574 | -2.408877 |
| 25               | 1                | 0              | -1.374715               | -2.792212 | -1.835502 |
| 26               | 1                | 0              | -3.029300               | -3.378235 | -1.746436 |
| 27               | 1                | 0              | -1.047430               | 0.821171  | 1.502743  |
| 28               | 1                | 0              | -2.735198               | 0.740161  | 1.013716  |
| 29               | 1                | 0              | -2.088283               | -0.439752 | 2.150610  |
| 30               | 6                | 0              | -4.028001               | -1.511881 | 0.073951  |
| 31               | 6                | 0              | -4.561270               | -0.424389 | -0.882504 |
| 32               | 6                | 0              | -5.895096               | 0.200656  | -0.477335 |
| 33               | 6                | 0              | -6.328764               | 1.386341  | -1.359796 |
| 34               | 6                | 0              | -5.839782               | 2.616081  | -0.587873 |
| 35               | 6                | 0              | -5.777959               | 2.112561  | 0.851202  |
| 36               | 8                | 0              | -5.806822               | 0.753923  | 0.866967  |
| 37               | 1                | 0              | -6.673618               | -0.559416 | -0.426797 |
| 38               | 1                | 0              | -7.418076               | 1.412343  | -1.444494 |
| 39               | 1                | 0              | -5.918135               | 1.316175  | -2.367453 |
| 40               | 1                | 0              | -4.801803               | 2.840383  | -0.861020 |
| 41               | 6                | 0              | -6.670628               | 3.886400  | -0.736651 |
| 42               | 1                | 0              | -4.054565               | -1.094786 | 1.082142  |
| 43               | 1                | 0              | -4.702869               | -0.845898 | -1.883579 |
| 44               | 1                | 0              | -3.829401               | 0.378443  | -0.990886 |
| 45               | 8                | 0              | -5.701617               | 2.761792  | 1.855417  |
| 46               | 1                | 0              | -6.295150               | 4.667126  | -0.074441 |
| 47               | 1                | 0              | -6.633464               | 4.254875  | -1.763916 |
| 48               | 1                | 0              | -7.716114               | 3.700999  | -0.479124 |
| 49               | 1                | 0              | 1.130897                | -1.080548 | -1.607361 |
| 50               | 6                | 0              | 2.864921                | 0.001668  | -1.024658 |
| 51               | 6                | 0              | 3.221090                | 0.006772  | -2.521288 |

|    |   |   |           |           |           |
|----|---|---|-----------|-----------|-----------|
| 52 | 6 | 0 | 3.227677  | 1.385050  | -0.423215 |
| 53 | 1 | 0 | 4.297120  | 0.056506  | -2.687494 |
| 54 | 1 | 0 | 2.854833  | -0.883487 | -3.034460 |
| 55 | 1 | 0 | 2.767380  | 0.873229  | -3.010480 |
| 56 | 6 | 0 | 4.702874  | 1.781636  | -0.501205 |
| 57 | 6 | 0 | 4.951044  | 3.186245  | 0.003224  |
| 58 | 8 | 0 | 4.114866  | 4.039062  | 0.170077  |
| 59 | 8 | 0 | 6.268362  | 3.390787  | 0.231989  |
| 60 | 6 | 0 | 6.625576  | 4.710740  | 0.676863  |
| 61 | 6 | 0 | 4.557797  | -2.046139 | -0.920068 |
| 62 | 1 | 0 | 4.083064  | -0.718028 | 0.639659  |
| 63 | 6 | 0 | 5.864540  | -1.832688 | -0.776398 |
| 64 | 6 | 0 | 4.073086  | -3.187252 | -1.784022 |
| 65 | 1 | 0 | 6.598011  | -2.434767 | -1.300941 |
| 66 | 1 | 0 | 6.250747  | -1.064349 | -0.117892 |
| 67 | 1 | 0 | 4.882337  | -3.570724 | -2.406398 |
| 68 | 1 | 0 | 3.713900  | -4.020114 | -1.170460 |
| 69 | 1 | 0 | 3.248589  | -2.901648 | -2.441353 |
| 70 | 1 | 0 | 5.079059  | 1.755381  | -1.528790 |
| 71 | 1 | 0 | 5.346243  | 1.106780  | 0.065603  |
| 72 | 1 | 0 | 2.909805  | 1.417608  | 0.617774  |
| 73 | 1 | 0 | 2.647410  | 2.151926  | -0.941278 |
| 74 | 8 | 0 | 3.846330  | -2.578922 | 2.280329  |
| 75 | 1 | 0 | 2.008404  | -3.362563 | 2.163648  |
| 76 | 6 | 0 | 1.131524  | -0.395094 | 2.869074  |
| 77 | 1 | 0 | 2.035234  | -0.853648 | 3.277019  |
| 78 | 1 | 0 | 0.933027  | 0.524767  | 3.419501  |
| 79 | 1 | 0 | 0.286330  | -1.074706 | 3.003401  |
| 80 | 6 | 0 | -4.981929 | -2.721909 | 0.078643  |
| 81 | 1 | 0 | -5.970398 | -2.433243 | 0.440007  |
| 82 | 1 | 0 | -5.110091 | -3.148931 | -0.919448 |
| 83 | 1 | 0 | -4.629937 | -3.515402 | 0.737834  |
| 84 | 1 | 0 | 6.339500  | 5.454616  | -0.066572 |
| 85 | 1 | 0 | 6.131222  | 4.941415  | 1.620228  |
| 86 | 1 | 0 | 7.704973  | 4.692472  | 0.804820  |

---

| Center<br>Number | Atomic<br>Number | Atomic<br>Type | Coordinates (Angstroms) |           |           |
|------------------|------------------|----------------|-------------------------|-----------|-----------|
|                  |                  |                | X                       | Y         | Z         |
| 1                | 6                | 0              | -0.891294               | 0.176995  | -1.150270 |
| 2                | 6                | 0              | 0.492183                | 0.842147  | -1.021087 |
| 3                | 1                | 0              | -0.897847               | -0.366196 | -2.095895 |
| 4                | 1                | 0              | -1.652299               | 0.957327  | -1.233143 |
| 5                | 1                | 0              | 0.518338                | 1.535668  | -0.179784 |
| 6                | 1                | 0              | 0.681141                | 1.430197  | -1.924568 |
| 7                | 6                | 0              | 3.740221                | -1.095286 | -0.135874 |
| 8                | 6                | 0              | 2.575737                | -1.999671 | 0.347538  |
| 9                | 6                | 0              | 1.352744                | -1.033266 | 0.447401  |
| 10               | 6                | 0              | 1.555248                | -0.239415 | -0.858417 |
| 11               | 6                | 0              | 2.973074                | -2.803374 | 1.567065  |
| 12               | 1                | 0              | 2.299060                | -2.729080 | -0.413264 |
| 13               | 8                | 0              | 1.497463                | -0.085809 | 1.522824  |
| 14               | 6                | 0              | -1.868596               | -3.084576 | 0.619359  |
| 15               | 6                | 0              | -2.332641               | -1.924572 | -0.315248 |
| 16               | 6                | 0              | -1.246798               | -0.779800 | 0.021233  |
| 17               | 6                | 0              | -0.031127               | -1.638888 | 0.433489  |
| 18               | 6                | 0              | -0.391818               | -2.872968 | 0.771710  |
| 19               | 1                | 0              | -2.361251               | -3.034070 | 1.599230  |
| 20               | 1                | 0              | -2.112074               | -4.067418 | 0.207025  |
| 21               | 6                | 0              | -2.182511               | -2.428957 | -1.764782 |
| 22               | 6                | 0              | -1.680202               | 0.079843  | 1.232618  |
| 23               | 1                | 0              | 0.280576                | -3.641203 | 1.131781  |
| 24               | 1                | 0              | -2.478141               | -1.687999 | -2.508048 |
| 25               | 1                | 0              | -1.150465               | -2.716332 | -1.973809 |
| 26               | 1                | 0              | -2.801040               | -3.314239 | -1.922372 |
| 27               | 1                | 0              | -0.872780               | 0.750186  | 1.523938  |
| 28               | 1                | 0              | -2.554542               | 0.691040  | 1.004916  |
| 29               | 1                | 0              | -1.920727               | -0.536672 | 2.101002  |
| 30               | 6                | 0              | -3.820542               | -1.542083 | -0.024775 |
| 31               | 6                | 0              | -4.367064               | -0.445935 | -0.966008 |
| 32               | 6                | 0              | -5.613100               | 0.270950  | -0.471955 |
| 33               | 6                | 0              | -6.189471               | 1.310248  | -1.445124 |
| 34               | 6                | 0              | -6.772965               | 2.386707  | -0.521864 |
| 35               | 6                | 0              | -5.948171               | 2.220949  | 0.752537  |
| 36               | 8                | 0              | -5.292181               | 1.030690  | 0.729257  |
| 37               | 1                | 0              | -6.384437               | -0.447545 | -0.182074 |
| 38               | 1                | 0              | -6.927106               | 0.869577  | -2.117389 |
| 39               | 1                | 0              | -5.384158               | 1.725247  | -2.056617 |
| 40               | 1                | 0              | -6.600294               | 3.395016  | -0.900574 |
| 41               | 6                | 0              | -8.267849               | 2.222743  | -0.210549 |
| 42               | 1                | 0              | -3.852293               | -1.143677 | 0.991068  |
| 43               | 1                | 0              | -4.612056               | -0.883370 | -1.940417 |
| 44               | 1                | 0              | -3.611194               | 0.318252  | -1.153670 |
| 45               | 8                | 0              | -5.862488               | 2.981017  | 1.675105  |
| 46               | 1                | 0              | -8.583904               | 2.947188  | 0.541145  |
| 47               | 1                | 0              | -8.860777               | 2.381157  | -1.113632 |
| 48               | 1                | 0              | -8.491625               | 1.222603  | 0.169210  |
| 49               | 1                | 0              | 1.367545                | -0.974307 | -1.650863 |
| 50               | 6                | 0              | 3.074488                | 0.100400  | -0.966760 |
| 51               | 6                | 0              | 3.471939                | 0.111444  | -2.450571 |

|    |   |   |           |           |           |
|----|---|---|-----------|-----------|-----------|
| 52 | 6 | 0 | 3.361991  | 1.485114  | -0.329500 |
| 53 | 1 | 0 | 4.532906  | 0.312793  | -2.602554 |
| 54 | 1 | 0 | 3.254564  | -0.844958 | -2.927968 |
| 55 | 1 | 0 | 2.912837  | 0.887615  | -2.980807 |
| 56 | 6 | 0 | 4.829718  | 1.953116  | -0.312195 |
| 57 | 6 | 0 | 4.939712  | 3.293782  | 0.374048  |
| 58 | 8 | 0 | 5.165646  | 3.458040  | 1.547795  |
| 59 | 8 | 0 | 4.722659  | 4.313218  | -0.487128 |
| 60 | 6 | 0 | 4.755745  | 5.631376  | 0.088261  |
| 61 | 6 | 0 | 4.872458  | -1.868715 | -0.802878 |
| 62 | 1 | 0 | 4.168895  | -0.639311 | 0.763327  |
| 63 | 6 | 0 | 4.703180  | -3.030772 | -1.433986 |
| 64 | 6 | 0 | 6.255263  | -1.275341 | -0.692505 |
| 65 | 1 | 0 | 5.545110  | -3.543325 | -1.884665 |
| 66 | 1 | 0 | 3.744182  | -3.522172 | -1.531116 |
| 67 | 1 | 0 | 6.519294  | -1.092269 | 0.354178  |
| 68 | 1 | 0 | 7.004651  | -1.942307 | -1.119843 |
| 69 | 1 | 0 | 6.330113  | -0.314752 | -1.207797 |
| 70 | 1 | 0 | 5.226227  | 2.041353  | -1.324447 |
| 71 | 1 | 0 | 5.450981  | 1.262141  | 0.255003  |
| 72 | 1 | 0 | 2.988812  | 1.480962  | 0.694009  |
| 73 | 1 | 0 | 2.782128  | 2.233566  | -0.876373 |
| 74 | 8 | 0 | 2.552038  | -3.901985 | 1.836364  |
| 75 | 1 | 0 | 3.735381  | -2.329644 | 2.220972  |
| 76 | 6 | 0 | 1.317146  | -0.548857 | 2.853723  |
| 77 | 1 | 0 | 1.148473  | 0.335976  | 3.467493  |
| 78 | 1 | 0 | 2.208638  | -1.062252 | 3.228507  |
| 79 | 1 | 0 | 0.458798  | -1.217853 | 2.944239  |
| 80 | 6 | 0 | -4.760258 | -2.762475 | -0.047097 |
| 81 | 1 | 0 | -5.774261 | -2.476521 | 0.240399  |
| 82 | 1 | 0 | -4.820953 | -3.214530 | -1.040181 |
| 83 | 1 | 0 | -4.442935 | -3.534844 | 0.653583  |
| 84 | 1 | 0 | 5.732896  | 5.829460  | 0.528005  |
| 85 | 1 | 0 | 4.560340  | 6.313784  | -0.735059 |
| 86 | 1 | 0 | 3.991539  | 5.729202  | 0.858952  |

---



| Center<br>Number | Atomic<br>Number | Atomic<br>Type | Coordinates (Angstroms) |           |           |
|------------------|------------------|----------------|-------------------------|-----------|-----------|
|                  |                  |                | X                       | Y         | Z         |
| 1                | 6                | 0              | -0.940060               | 0.143914  | -1.135579 |
| 2                | 6                | 0              | 0.443988                | 0.811507  | -1.030796 |
| 3                | 1                | 0              | -0.953883               | -0.416791 | -2.070871 |
| 4                | 1                | 0              | -1.703020               | 0.921272  | -1.226341 |
| 5                | 1                | 0              | 0.477114                | 1.524468  | -0.206222 |
| 6                | 1                | 0              | 0.626663                | 1.377602  | -1.949125 |
| 7                | 6                | 0              | 3.705071                | -1.134708 | -0.187426 |
| 8                | 6                | 0              | 2.552791                | -1.974128 | 0.418882  |
| 9                | 6                | 0              | 1.317741                | -1.023229 | 0.480520  |
| 10               | 6                | 0              | 1.507618                | -0.265723 | -0.849423 |
| 11               | 6                | 0              | 2.959563                | -2.708261 | 1.676130  |
| 12               | 1                | 0              | 2.256644                | -2.772262 | -0.271124 |
| 13               | 8                | 0              | 1.442321                | -0.039726 | 1.525411  |
| 14               | 6                | 0              | -1.907497               | -3.080432 | 0.709153  |
| 15               | 6                | 0              | -2.371696               | -1.944516 | -0.253891 |
| 16               | 6                | 0              | -1.287331               | -0.790774 | 0.056249  |
| 17               | 6                | 0              | -0.065839               | -1.635892 | 0.484307  |
| 18               | 6                | 0              | -0.430935               | -2.860504 | 0.850506  |
| 19               | 1                | 0              | -2.398663               | -3.003771 | 1.687927  |
| 20               | 1                | 0              | -2.150865               | -4.073260 | 0.321610  |
| 21               | 6                | 0              | -2.219483               | -2.483455 | -1.690673 |
| 22               | 6                | 0              | -1.718831               | 0.090258  | 1.252903  |
| 23               | 1                | 0              | 0.232126                | -3.629109 | 1.227952  |
| 24               | 1                | 0              | -2.520225               | -1.762283 | -2.450822 |
| 25               | 1                | 0              | -1.185903               | -2.768716 | -1.894854 |
| 26               | 1                | 0              | -2.833188               | -3.375676 | -1.826608 |
| 27               | 1                | 0              | -0.914980               | 0.772992  | 1.523725  |
| 28               | 1                | 0              | -2.599808               | 0.688437  | 1.017278  |
| 29               | 1                | 0              | -1.948920               | -0.509545 | 2.135749  |
| 30               | 6                | 0              | -3.860507               | -1.558428 | 0.027324  |
| 31               | 6                | 0              | -4.407557               | -0.483022 | -0.936969 |
| 32               | 6                | 0              | -5.661156               | 0.234842  | -0.463711 |
| 33               | 6                | 0              | -6.230628               | 1.260697  | -1.455068 |
| 34               | 6                | 0              | -6.827267               | 2.345837  | -0.550440 |
| 35               | 6                | 0              | -6.016111               | 2.197409  | 0.734737  |
| 36               | 8                | 0              | -5.355128               | 1.009038  | 0.731659  |
| 37               | 1                | 0              | -6.433237               | -0.482959 | -0.174079 |
| 38               | 1                | 0              | -6.959810               | 0.809734  | -2.129702 |
| 39               | 1                | 0              | -5.420435               | 1.671337  | -2.063005 |
| 40               | 1                | 0              | -6.653293               | 3.350197  | -0.938875 |
| 41               | 6                | 0              | -8.325034               | 2.181027  | -0.253769 |
| 42               | 1                | 0              | -3.893514               | -1.138628 | 1.034468  |
| 43               | 1                | 0              | -4.643289               | -0.938763 | -1.905230 |
| 44               | 1                | 0              | -3.655073               | 0.282330  | -1.132566 |
| 45               | 8                | 0              | -5.943338               | 2.967178  | 1.650045  |
| 46               | 1                | 0              | -8.651522               | 2.913396  | 0.485660  |
| 47               | 1                | 0              | -8.908214               | 2.326928  | -1.165239 |
| 48               | 1                | 0              | -8.550130               | 1.184782  | 0.135359  |
| 49               | 1                | 0              | 1.312507                | -1.024171 | -1.618769 |
| 50               | 6                | 0              | 3.024098                | 0.067648  | -0.988419 |
| 51               | 6                | 0              | 3.385854                | 0.113696  | -2.481308 |

|    |   |   |           |           |           |
|----|---|---|-----------|-----------|-----------|
| 52 | 6 | 0 | 3.350441  | 1.438084  | -0.337703 |
| 53 | 1 | 0 | 4.453318  | 0.261762  | -2.648697 |
| 54 | 1 | 0 | 3.109053  | -0.809117 | -2.991310 |
| 55 | 1 | 0 | 2.859417  | 0.940307  | -2.966942 |
| 56 | 6 | 0 | 4.829380  | 1.872035  | -0.368530 |
| 57 | 6 | 0 | 4.988665  | 3.214693  | 0.303612  |
| 58 | 8 | 0 | 5.187073  | 3.386786  | 1.480881  |
| 59 | 8 | 0 | 4.850049  | 4.231756  | -0.578317 |
| 60 | 6 | 0 | 4.936802  | 5.554193  | -0.019717 |
| 61 | 6 | 0 | 4.726622  | -1.978176 | -0.943004 |
| 62 | 1 | 0 | 4.237295  | -0.698896 | 0.659276  |
| 63 | 6 | 0 | 4.401903  | -3.000987 | -1.732440 |
| 64 | 6 | 0 | 6.170117  | -1.598895 | -0.741788 |
| 65 | 1 | 0 | 5.164160  | -3.570666 | -2.251072 |
| 66 | 1 | 0 | 3.378726  | -3.315108 | -1.903024 |
| 67 | 1 | 0 | 6.839879  | -2.271458 | -1.278983 |
| 68 | 1 | 0 | 6.368261  | -0.579846 | -1.087252 |
| 69 | 1 | 0 | 6.424935  | -1.630284 | 0.321745  |
| 70 | 1 | 0 | 5.199007  | 1.944229  | -1.391759 |
| 71 | 1 | 0 | 5.448869  | 1.167699  | 0.186023  |
| 72 | 1 | 0 | 3.016265  | 1.426922  | 0.698498  |
| 73 | 1 | 0 | 2.765650  | 2.205297  | -0.853476 |
| 74 | 8 | 0 | 4.061051  | -2.671244 | 2.167520  |
| 75 | 1 | 0 | 2.177791  | -3.348361 | 2.132343  |
| 76 | 6 | 0 | 1.299436  | -0.463577 | 2.874998  |
| 77 | 1 | 0 | 0.455994  | -1.146952 | 3.003097  |
| 78 | 1 | 0 | 2.210993  | -0.935677 | 3.250362  |
| 79 | 1 | 0 | 1.115152  | 0.437469  | 3.460086  |
| 80 | 6 | 0 | -4.797932 | -2.780835 | 0.030439  |
| 81 | 1 | 0 | -5.811446 | -2.490992 | 0.315146  |
| 82 | 1 | 0 | -4.860688 | -3.251901 | -0.953632 |
| 83 | 1 | 0 | -4.478436 | -3.539427 | 0.745202  |
| 84 | 1 | 0 | 4.807663  | 6.234021  | -0.858211 |
| 85 | 1 | 0 | 4.153640  | 5.706358  | 0.722770  |
| 86 | 1 | 0 | 5.907847  | 5.704983  | 0.451286  |

---

| Center<br>Number | Atomic<br>Number | Atomic<br>Type | Coordinates (Angstroms) |           |           |
|------------------|------------------|----------------|-------------------------|-----------|-----------|
|                  |                  |                | X                       | Y         | Z         |
| 1                | 6                | 0              | -0.960672               | 0.216039  | -1.156765 |
| 2                | 6                | 0              | 0.435481                | 0.859981  | -1.054183 |
| 3                | 1                | 0              | -0.982700               | -0.352121 | -2.087515 |
| 4                | 1                | 0              | -1.708649               | 1.006875  | -1.256626 |
| 5                | 1                | 0              | 0.482298                | 1.578224  | -0.234888 |
| 6                | 1                | 0              | 0.630336                | 1.417405  | -1.975491 |
| 7                | 6                | 0              | 3.653015                | -1.092603 | -0.110952 |
| 8                | 6                | 0              | 2.477561                | -1.976599 | 0.395061  |
| 9                | 6                | 0              | 1.270850                | -0.984348 | 0.466330  |
| 10               | 6                | 0              | 1.478480                | -0.236319 | -0.866441 |
| 11               | 6                | 0              | 2.863407                | -2.736519 | 1.642851  |
| 12               | 1                | 0              | 2.200410                | -2.728947 | -0.344554 |
| 13               | 8                | 0              | 1.440338                | -0.006392 | 1.510472  |
| 14               | 6                | 0              | -1.978925               | -2.979845 | 0.712064  |
| 15               | 6                | 0              | -2.428454               | -1.842396 | -0.257198 |
| 16               | 6                | 0              | -1.326588               | -0.702646 | 0.042595  |
| 17               | 6                | 0              | -0.121945               | -1.566726 | 0.477656  |
| 18               | 6                | 0              | -0.498876               | -2.784621 | 0.854329  |
| 19               | 1                | 0              | -2.468785               | -2.891498 | 1.690680  |
| 20               | 1                | 0              | -2.237365               | -3.971207 | 0.330533  |
| 21               | 6                | 0              | -2.286947               | -2.392411 | -1.690815 |
| 22               | 6                | 0              | -1.744476               | 0.198194  | 1.229186  |
| 23               | 1                | 0              | 0.162829                | -3.552778 | 1.234259  |
| 24               | 1                | 0              | -2.577860               | -1.671861 | -2.455677 |
| 25               | 1                | 0              | -1.257963               | -2.694966 | -1.893381 |
| 26               | 1                | 0              | -2.913868               | -3.276444 | -1.819899 |
| 27               | 1                | 0              | -0.930917               | 0.872924  | 1.492482  |
| 28               | 1                | 0              | -2.615805               | 0.808301  | 0.988161  |
| 29               | 1                | 0              | -1.984119               | -0.388180 | 2.118365  |
| 30               | 6                | 0              | -3.910351               | -1.431905 | 0.024805  |
| 31               | 6                | 0              | -4.441464               | -0.349167 | -0.939901 |
| 32               | 6                | 0              | -5.693672               | 0.376048  | -0.474331 |
| 33               | 6                | 0              | -6.240478               | 1.419864  | -1.459524 |
| 34               | 6                | 0              | -6.842335               | 2.496659  | -0.548375 |
| 35               | 6                | 0              | -6.051152               | 2.323964  | 0.746323  |
| 36               | 8                | 0              | -5.396958               | 1.132346  | 0.735010  |
| 37               | 1                | 0              | -6.476599               | -0.337573 | -0.204254 |
| 38               | 1                | 0              | -6.963001               | 0.984031  | -2.151097 |
| 39               | 1                | 0              | -5.418210               | 1.832748  | -2.049436 |
| 40               | 1                | 0              | -6.655491               | 3.505089  | -0.919906 |
| 41               | 6                | 0              | -8.345379               | 2.338675  | -0.275584 |
| 42               | 1                | 0              | -3.934914               | -1.009597 | 1.031211  |
| 43               | 1                | 0              | -4.673439               | -0.799298 | -1.911733 |
| 44               | 1                | 0              | -3.681098               | 0.410660  | -1.126919 |
| 45               | 8                | 0              | -5.988488               | 3.079580  | 1.674264  |
| 46               | 1                | 0              | -8.677380               | 3.063355  | 0.468974  |
| 47               | 1                | 0              | -8.914393               | 2.500842  | -1.193265 |
| 48               | 1                | 0              | -8.582982               | 1.338957  | 0.096892  |
| 49               | 1                | 0              | 1.265344                | -0.993945 | -1.630712 |
| 50               | 6                | 0              | 3.001324                | 0.064527  | -1.001108 |
| 51               | 6                | 0              | 3.400679                | 0.026489  | -2.486213 |

|    |   |   |           |           |           |
|----|---|---|-----------|-----------|-----------|
| 52 | 6 | 0 | 3.349669  | 1.462573  | -0.426790 |
| 53 | 1 | 0 | 4.482972  | 0.030684  | -2.621582 |
| 54 | 1 | 0 | 3.009251  | -0.855898 | -2.993966 |
| 55 | 1 | 0 | 2.997070  | 0.901280  | -3.003745 |
| 56 | 6 | 0 | 4.822521  | 1.867882  | -0.503419 |
| 57 | 6 | 0 | 5.062843  | 3.273141  | 0.002791  |
| 58 | 8 | 0 | 4.221805  | 4.121196  | 0.167690  |
| 59 | 8 | 0 | 6.378607  | 3.483670  | 0.236103  |
| 60 | 6 | 0 | 6.728354  | 4.806860  | 0.678433  |
| 61 | 6 | 0 | 4.792262  | -1.910725 | -0.701520 |
| 62 | 1 | 0 | 4.061565  | -0.594285 | 0.771452  |
| 63 | 6 | 0 | 6.052424  | -1.688016 | -0.326812 |
| 64 | 6 | 0 | 4.477072  | -3.032045 | -1.663270 |
| 65 | 1 | 0 | 6.875052  | -2.266825 | -0.731175 |
| 66 | 1 | 0 | 6.309223  | -0.927272 | 0.401258  |
| 67 | 1 | 0 | 5.388459  | -3.409078 | -2.128505 |
| 68 | 1 | 0 | 4.001766  | -3.870183 | -1.144409 |
| 69 | 1 | 0 | 3.794462  | -2.723377 | -2.456365 |
| 70 | 1 | 0 | 5.195836  | 1.845697  | -1.532203 |
| 71 | 1 | 0 | 5.471714  | 1.194491  | 0.057667  |
| 72 | 1 | 0 | 3.020361  | 1.514847  | 0.610434  |
| 73 | 1 | 0 | 2.768420  | 2.213743  | -0.965803 |
| 74 | 8 | 0 | 2.509484  | -3.862708 | 1.898644  |
| 75 | 1 | 0 | 3.554520  | -2.206766 | 2.330194  |
| 76 | 6 | 0 | 1.217968  | -0.407798 | 2.855054  |
| 77 | 1 | 0 | 0.344712  | -1.055664 | 2.953166  |
| 78 | 1 | 0 | 2.088911  | -0.921587 | 3.274711  |
| 79 | 1 | 0 | 1.050473  | 0.505755  | 3.425855  |
| 80 | 6 | 0 | -4.866745 | -2.639519 | 0.032580  |
| 81 | 1 | 0 | -5.872849 | -2.335802 | 0.328767  |
| 82 | 1 | 0 | -4.946144 | -3.106202 | -0.952459 |
| 83 | 1 | 0 | -4.550788 | -3.405359 | 0.740993  |
| 84 | 1 | 0 | 7.807465  | 4.794150  | 0.809295  |
| 85 | 1 | 0 | 6.440751  | 5.547019  | -0.068019 |
| 86 | 1 | 0 | 6.230106  | 5.037939  | 1.619629  |

---

| Center<br>Number | Atomic<br>Number | Atomic<br>Type | Coordinates (Angstroms) |           |           |
|------------------|------------------|----------------|-------------------------|-----------|-----------|
|                  |                  |                | X                       | Y         | Z         |
| 1                | 6                | 0              | -0.980094               | 0.515751  | -0.760345 |
| 2                | 6                | 0              | 0.357268                | 1.107629  | -0.277321 |
| 3                | 1                | 0              | -0.882543               | 0.336313  | -1.831575 |
| 4                | 1                | 0              | -1.765256               | 1.267243  | -0.640998 |
| 5                | 1                | 0              | 0.281939                | 1.464806  | 0.750497  |
| 6                | 1                | 0              | 0.599470                | 1.975079  | -0.898890 |
| 7                | 6                | 0              | 3.595357                | -0.976393 | 0.212074  |
| 8                | 6                | 0              | 2.434568                | -2.011147 | 0.236225  |
| 9                | 6                | 0              | 1.166191                | -1.150038 | 0.534989  |
| 10               | 6                | 0              | 1.446167                | 0.046369  | -0.396816 |
| 11               | 6                | 0              | 2.754048                | -3.171967 | 1.150419  |
| 12               | 1                | 0              | 2.272169                | -2.442146 | -0.752556 |
| 13               | 8                | 0              | 1.171743                | -0.629049 | 1.879622  |
| 14               | 6                | 0              | -1.960820               | -3.170482 | -0.330633 |
| 15               | 6                | 0              | -2.392675               | -1.763642 | -0.849591 |
| 16               | 6                | 0              | -1.394854               | -0.793630 | -0.033207 |
| 17               | 6                | 0              | -0.182092               | -1.728780 | 0.178059  |
| 18               | 6                | 0              | -0.514840               | -3.007364 | 0.030882  |
| 19               | 1                | 0              | -2.539380               | -3.470218 | 0.552851  |
| 20               | 1                | 0              | -2.121528               | -3.951427 | -1.078683 |
| 21               | 6                | 0              | -2.089624               | -1.731723 | -2.361019 |
| 22               | 6                | 0              | -1.974496               | -0.416850 | 1.351102  |
| 23               | 1                | 0              | 0.156803                | -3.845799 | 0.165956  |
| 24               | 1                | 0              | -2.353878               | -0.783174 | -2.828926 |
| 25               | 1                | 0              | -1.030398               | -1.913835 | -2.551292 |
| 26               | 1                | 0              | -2.648272               | -2.515891 | -2.874973 |
| 27               | 1                | 0              | -1.233854               | 0.128473  | 1.934197  |
| 28               | 1                | 0              | -2.857754               | 0.216532  | 1.262006  |
| 29               | 1                | 0              | -2.257465               | -1.300712 | 1.925747  |
| 30               | 6                | 0              | -3.917512               | -1.524942 | -0.594922 |
| 31               | 6                | 0              | -4.431642               | -0.179363 | -1.151827 |
| 32               | 6                | 0              | -5.776330               | 0.278943  | -0.592023 |
| 33               | 6                | 0              | -6.252195               | 1.642227  | -1.128182 |
| 34               | 6                | 0              | -5.774982               | 2.640066  | -0.068266 |
| 35               | 6                | 0              | -5.672991               | 1.779587  | 1.188025  |
| 36               | 8                | 0              | -5.682289               | 0.463856  | 0.850518  |
| 37               | 1                | 0              | -6.534804               | -0.489492 | -0.735480 |
| 38               | 1                | 0              | -7.343250               | 1.661312  | -1.189050 |
| 39               | 1                | 0              | -5.859440               | 1.847336  | -2.124375 |
| 40               | 1                | 0              | -4.748160               | 2.956085  | -0.287997 |
| 41               | 6                | 0              | -6.637467               | 3.881871  | 0.132553  |
| 42               | 1                | 0              | -4.057567               | -1.503604 | 0.487229  |
| 43               | 1                | 0              | -4.545898               | -0.249705 | -2.238864 |
| 44               | 1                | 0              | -3.704093               | 0.614636  | -0.971757 |
| 45               | 8                | 0              | -5.582754               | 2.147364  | 2.325204  |
| 46               | 1                | 0              | -6.266236               | 4.473415  | 0.970042  |
| 47               | 1                | 0              | -6.631239               | 4.506167  | -0.763421 |
| 48               | 1                | 0              | -7.672598               | 3.606497  | 0.347958  |
| 49               | 1                | 0              | 1.350797                | -0.375983 | -1.404659 |
| 50               | 6                | 0              | 2.954300                | 0.413420  | -0.250902 |
| 51               | 6                | 0              | 3.483653                | 0.937942  | -1.595043 |

|    |   |   |           |           |           |
|----|---|---|-----------|-----------|-----------|
| 52 | 6 | 0 | 3.158696  | 1.497780  | 0.840554  |
| 53 | 1 | 0 | 4.569256  | 1.043903  | -1.597860 |
| 54 | 1 | 0 | 3.215466  | 0.279522  | -2.422240 |
| 55 | 1 | 0 | 3.050120  | 1.918146  | -1.809128 |
| 56 | 6 | 0 | 4.600764  | 1.974466  | 1.101293  |
| 57 | 6 | 0 | 5.195413  | 2.973877  | 0.133241  |
| 58 | 8 | 0 | 6.311783  | 2.918501  | -0.321433 |
| 59 | 8 | 0 | 4.346121  | 3.992835  | -0.130426 |
| 60 | 6 | 0 | 4.857885  | 5.018945  | -0.997702 |
| 61 | 6 | 0 | 4.825055  | -1.495577 | -0.520813 |
| 62 | 1 | 0 | 3.901695  | -0.831394 | 1.251045  |
| 63 | 6 | 0 | 6.034481  | -1.392766 | 0.029901  |
| 64 | 6 | 0 | 4.656768  | -2.202126 | -1.845600 |
| 65 | 1 | 0 | 6.920764  | -1.759794 | -0.474529 |
| 66 | 1 | 0 | 6.187117  | -0.937979 | 1.001599  |
| 67 | 1 | 0 | 5.625029  | -2.365844 | -2.319632 |
| 68 | 1 | 0 | 4.187455  | -3.181498 | -1.710280 |
| 69 | 1 | 0 | 4.029470  | -1.645233 | -2.543548 |
| 70 | 1 | 0 | 5.305112  | 1.147283  | 1.163711  |
| 71 | 1 | 0 | 4.613883  | 2.474781  | 2.076171  |
| 72 | 1 | 0 | 2.759467  | 1.111724  | 1.777803  |
| 73 | 1 | 0 | 2.556198  | 2.371556  | 0.585433  |
| 74 | 8 | 0 | 2.440310  | -4.318928 | 0.939060  |
| 75 | 1 | 0 | 3.354629  | -2.922028 | 2.049067  |
| 76 | 6 | 0 | 0.869450  | -1.518651 | 2.946256  |
| 77 | 1 | 0 | 0.546199  | -0.900990 | 3.784579  |
| 78 | 1 | 0 | 0.069299  | -2.214997 | 2.687347  |
| 79 | 1 | 0 | 1.750165  | -2.089686 | 3.257513  |
| 80 | 6 | 0 | -4.791530 | -2.675844 | -1.129043 |
| 81 | 1 | 0 | -5.838468 | -2.526825 | -0.857515 |
| 82 | 1 | 0 | -4.746009 | -2.753148 | -2.218331 |
| 83 | 1 | 0 | -4.495832 | -3.638853 | -0.712799 |
| 84 | 1 | 0 | 4.052614  | 5.742118  | -1.100638 |
| 85 | 1 | 0 | 5.738940  | 5.485384  | -0.557491 |
| 86 | 1 | 0 | 5.125052  | 4.599776  | -1.967545 |

---

| Center<br>Number | Atomic<br>Number | Atomic<br>Type | Coordinates (Angstroms) |           |           |
|------------------|------------------|----------------|-------------------------|-----------|-----------|
|                  |                  |                | X                       | Y         | Z         |
| 1                | 6                | 0              | -0.913464               | 0.606201  | -0.805959 |
| 2                | 6                | 0              | 0.436034                | 1.172310  | -0.327656 |
| 3                | 1                | 0              | -0.815233               | 0.401398  | -1.872594 |
| 4                | 1                | 0              | -1.678449               | 1.380747  | -0.706495 |
| 5                | 1                | 0              | 0.363563                | 1.550900  | 0.692551  |
| 6                | 1                | 0              | 0.704134                | 2.021565  | -0.963022 |
| 7                | 6                | 0              | 3.620343                | -0.989828 | 0.198009  |
| 8                | 6                | 0              | 2.430863                | -1.985822 | 0.247388  |
| 9                | 6                | 0              | 1.184029                | -1.090850 | 0.530060  |
| 10               | 6                | 0              | 1.498492                | 0.081445  | -0.420073 |
| 11               | 6                | 0              | 2.722125                | -3.147053 | 1.173520  |
| 12               | 1                | 0              | 2.245292                | -2.426370 | -0.732045 |
| 13               | 8                | 0              | 1.197674                | -0.550812 | 1.867170  |
| 14               | 6                | 0              | -1.994313               | -3.042551 | -0.308980 |
| 15               | 6                | 0              | -2.388453               | -1.633964 | -0.851752 |
| 16               | 6                | 0              | -1.365032               | -0.676330 | -0.052560 |
| 17               | 6                | 0              | -0.178753               | -1.639911 | 0.178180  |
| 18               | 6                | 0              | -0.545194               | -2.911732 | 0.052473  |
| 19               | 1                | 0              | -2.581528               | -3.313104 | 0.578361  |
| 20               | 1                | 0              | -2.174672               | -3.831472 | -1.044306 |
| 21               | 6                | 0              | -2.087077               | -1.635717 | -2.363709 |
| 22               | 6                | 0              | -1.935859               | -0.254730 | 1.322667  |
| 23               | 1                | 0              | 0.103776                | -3.764529 | 0.205716  |
| 24               | 1                | 0              | -2.329022               | -0.689119 | -2.847406 |
| 25               | 1                | 0              | -1.032663               | -1.846198 | -2.551108 |
| 26               | 1                | 0              | -2.664720               | -2.415353 | -2.863488 |
| 27               | 1                | 0              | -1.179434               | 0.280286  | 1.895102  |
| 28               | 1                | 0              | -2.800905               | 0.401383  | 1.218973  |
| 29               | 1                | 0              | -2.242561               | -1.118959 | 1.915291  |
| 30               | 6                | 0              | -3.905560               | -1.350724 | -0.600491 |
| 31               | 6                | 0              | -4.381730               | 0.000474  | -1.178752 |
| 32               | 6                | 0              | -5.686558               | 0.527711  | -0.604841 |
| 33               | 6                | 0              | -6.184259               | 1.838845  | -1.231805 |
| 34               | 6                | 0              | -6.878177               | 2.557811  | -0.068558 |
| 35               | 6                | 0              | -6.189148               | 1.962090  | 1.156971  |
| 36               | 8                | 0              | -5.507259               | 0.839759  | 0.807249  |
| 37               | 1                | 0              | -6.467559               | -0.235912 | -0.651838 |
| 38               | 1                | 0              | -6.842997               | 1.655572  | -2.081845 |
| 39               | 1                | 0              | -5.331316               | 2.421899  | -1.588537 |
| 40               | 1                | 0              | -6.682198               | 3.630934  | -0.070027 |
| 41               | 6                | 0              | -8.394973               | 2.331827  | 0.013169  |
| 42               | 1                | 0              | -4.043606               | -1.308142 | 0.481503  |
| 43               | 1                | 0              | -4.520561               | -0.089264 | -2.261933 |
| 44               | 1                | 0              | -3.628135               | 0.775099  | -1.028934 |
| 45               | 8                | 0              | -6.219024               | 2.367444  | 2.284433  |
| 46               | 1                | 0              | -8.798711               | 2.773025  | 0.925373  |
| 47               | 1                | 0              | -8.891592               | 2.793381  | -0.842769 |
| 48               | 1                | 0              | -8.644056               | 1.267473  | 0.014235  |
| 49               | 1                | 0              | 1.401601                | -0.355328 | -1.421604 |
| 50               | 6                | 0              | 3.014606                | 0.419430  | -0.265037 |
| 51               | 6                | 0              | 3.555070                | 0.892785  | -1.622070 |

|    |   |   |           |           |           |
|----|---|---|-----------|-----------|-----------|
| 52 | 6 | 0 | 3.207786  | 1.518196  | 0.813652  |
| 53 | 1 | 0 | 4.625827  | 1.101155  | -1.598002 |
| 54 | 1 | 0 | 3.395533  | 0.139310  | -2.394892 |
| 55 | 1 | 0 | 3.051238  | 1.812152  | -1.928125 |
| 56 | 6 | 0 | 4.635499  | 1.999214  | 1.109319  |
| 57 | 6 | 0 | 5.167812  | 3.035191  | 0.143491  |
| 58 | 8 | 0 | 4.520843  | 3.921446  | -0.356639 |
| 59 | 8 | 0 | 6.496264  | 2.884799  | -0.063944 |
| 60 | 6 | 0 | 7.110715  | 3.875437  | -0.908265 |
| 61 | 6 | 0 | 4.824860  | -1.533137 | -0.564728 |
| 62 | 1 | 0 | 3.952241  | -0.851768 | 1.233115  |
| 63 | 6 | 0 | 4.732980  | -2.420262 | -1.555706 |
| 64 | 6 | 0 | 6.184738  | -1.050074 | -0.124077 |
| 65 | 1 | 0 | 5.622189  | -2.782930 | -2.058118 |
| 66 | 1 | 0 | 3.793299  | -2.822525 | -1.910202 |
| 67 | 1 | 0 | 6.978916  | -1.587144 | -0.643899 |
| 68 | 1 | 0 | 6.325958  | 0.016430  | -0.316073 |
| 69 | 1 | 0 | 6.322499  | -1.199050 | 0.952085  |
| 70 | 1 | 0 | 5.350536  | 1.184026  | 1.202153  |
| 71 | 1 | 0 | 4.627523  | 2.504466  | 2.082156  |
| 72 | 1 | 0 | 2.772932  | 1.154862  | 1.743465  |
| 73 | 1 | 0 | 2.629351  | 2.396757  | 0.520514  |
| 74 | 8 | 0 | 2.293645  | -4.266695 | 1.033930  |
| 75 | 1 | 0 | 3.411725  | -2.923106 | 2.015089  |
| 76 | 6 | 0 | 0.898925  | -1.428893 | 2.943097  |
| 77 | 1 | 0 | 0.600966  | -0.801408 | 3.783488  |
| 78 | 1 | 0 | 0.083347  | -2.113650 | 2.701338  |
| 79 | 1 | 0 | 1.775560  | -2.013350 | 3.242470  |
| 80 | 6 | 0 | -4.811722 | -2.484832 | -1.115600 |
| 81 | 1 | 0 | -5.854829 | -2.297743 | -0.852048 |
| 82 | 1 | 0 | -4.764950 | -2.584102 | -2.202993 |
| 83 | 1 | 0 | -4.547149 | -3.448361 | -0.679931 |
| 84 | 1 | 0 | 6.986321  | 4.869619  | -0.479856 |
| 85 | 1 | 0 | 8.162910  | 3.606331  | -0.954367 |
| 86 | 1 | 0 | 6.664847  | 3.857235  | -1.902373 |

---



| Center<br>Number | Atomic<br>Number | Atomic<br>Type | Coordinates (Angstroms) |           |           |
|------------------|------------------|----------------|-------------------------|-----------|-----------|
|                  |                  |                | X                       | Y         | Z         |
| 1                | 6                | 0              | -0.923726               | 0.021683  | -1.165714 |
| 2                | 6                | 0              | 0.440621                | 0.741015  | -1.154558 |
| 3                | 1                | 0              | -0.965306               | -0.558944 | -2.087742 |
| 4                | 1                | 0              | -1.718437               | 0.769164  | -1.233154 |
| 5                | 1                | 0              | 0.485620                | 1.491679  | -0.365008 |
| 6                | 1                | 0              | 0.561212                | 1.271008  | -2.103595 |
| 7                | 6                | 0              | 3.794522                | -0.884866 | -0.193858 |
| 8                | 6                | 0              | 2.731312                | -1.883232 | 0.332192  |
| 9                | 6                | 0              | 1.441356                | -0.995236 | 0.391592  |
| 10               | 6                | 0              | 1.540272                | -0.301432 | -0.981972 |
| 11               | 6                | 0              | 3.184597                | -2.572376 | 1.597919  |
| 12               | 1                | 0              | 2.525015                | -2.674834 | -0.391282 |
| 13               | 8                | 0              | 1.557061                | 0.040693  | 1.386675  |
| 14               | 6                | 0              | -1.650981               | -3.203083 | 0.794212  |
| 15               | 6                | 0              | -2.208788               | -2.120102 | -0.181108 |
| 16               | 6                | 0              | -1.178890               | -0.901335 | 0.061247  |
| 17               | 6                | 0              | 0.096415                | -1.673340 | 0.471781  |
| 18               | 6                | 0              | -0.184130               | -2.905486 | 0.883876  |
| 19               | 1                | 0              | -2.114707               | -3.129177 | 1.786605  |
| 20               | 1                | 0              | -1.851616               | -4.217328 | 0.439209  |
| 21               | 6                | 0              | -2.072912               | -2.690418 | -1.607224 |
| 22               | 6                | 0              | -1.620513               | -0.011882 | 1.247587  |
| 23               | 1                | 0              | 0.540975                | -3.618743 | 1.255237  |
| 24               | 1                | 0              | -2.435770               | -2.008643 | -2.376660 |
| 25               | 1                | 0              | -1.032120               | -2.926346 | -1.836311 |
| 26               | 1                | 0              | -2.641355               | -3.617601 | -1.698343 |
| 27               | 1                | 0              | -0.858406               | 0.736285  | 1.461157  |
| 28               | 1                | 0              | -2.549850               | 0.516401  | 1.033124  |
| 29               | 1                | 0              | -1.773513               | -0.594766 | 2.157674  |
| 30               | 6                | 0              | -3.707471               | -1.808525 | 0.140971  |
| 31               | 6                | 0              | -4.343693               | -0.782028 | -0.821581 |
| 32               | 6                | 0              | -5.659168               | -0.173295 | -0.341204 |
| 33               | 6                | 0              | -6.238668               | 0.902520  | -1.278643 |
| 34               | 6                | 0              | -5.728738               | 2.219943  | -0.685537 |
| 35               | 6                | 0              | -5.488421               | 1.863628  | 0.778867  |
| 36               | 8                | 0              | -5.460319               | 0.513953  | 0.928463  |
| 37               | 1                | 0              | -6.390461               | -0.953756 | -0.134936 |
| 38               | 1                | 0              | -7.330819               | 0.880531  | -1.244502 |
| 39               | 1                | 0              | -5.934787               | 0.747188  | -2.314186 |
| 40               | 1                | 0              | -4.738510               | 2.455153  | -1.093514 |
| 41               | 6                | 0              | -6.631470               | 3.437054  | -0.859202 |
| 42               | 1                | 0              | -3.732958               | -1.373281 | 1.141606  |
| 43               | 1                | 0              | -4.546948               | -1.257906 | -1.787023 |
| 44               | 1                | 0              | -3.647978               | 0.034682  | -1.023883 |
| 45               | 8                | 0              | -5.328146               | 2.612446  | 1.700915  |
| 46               | 1                | 0              | -6.226182               | 4.292962  | -0.318629 |
| 47               | 1                | 0              | -6.722012               | 3.703789  | -1.914229 |
| 48               | 1                | 0              | -7.633313               | 3.237638  | -0.471477 |
| 49               | 1                | 0              | 1.289603                | -1.103502 | -1.685535 |
| 50               | 6                | 0              | 3.047171                | 0.014724  | -1.266238 |
| 51               | 6                | 0              | 3.347218                | -0.408888 | -2.718465 |

|    |   |   |           |           |           |
|----|---|---|-----------|-----------|-----------|
| 52 | 6 | 0 | 3.461002  | 1.505340  | -1.185874 |
| 53 | 1 | 0 | 4.403966  | -0.287954 | -2.963859 |
| 54 | 1 | 0 | 3.068256  | -1.446605 | -2.907848 |
| 55 | 1 | 0 | 2.773826  | 0.213375  | -3.411269 |
| 56 | 6 | 0 | 3.400383  | 2.235722  | 0.156501  |
| 57 | 6 | 0 | 3.560088  | 3.731536  | 0.001447  |
| 58 | 8 | 0 | 3.396787  | 4.363708  | -1.013217 |
| 59 | 8 | 0 | 3.891037  | 4.306079  | 1.180272  |
| 60 | 6 | 0 | 4.010376  | 5.739237  | 1.162885  |
| 61 | 6 | 0 | 5.122133  | -1.499252 | -0.607589 |
| 62 | 1 | 0 | 4.015684  | -0.227648 | 0.648051  |
| 63 | 6 | 0 | 6.261558  | -0.858549 | -0.341956 |
| 64 | 6 | 0 | 5.144625  | -2.847906 | -1.284681 |
| 65 | 1 | 0 | 7.222786  | -1.263671 | -0.637059 |
| 66 | 1 | 0 | 6.274981  | 0.092071  | 0.179382  |
| 67 | 1 | 0 | 6.161241  | -3.115743 | -1.574743 |
| 68 | 1 | 0 | 4.773125  | -3.632223 | -0.618180 |
| 69 | 1 | 0 | 4.520618  | -2.875475 | -2.180277 |
| 70 | 1 | 0 | 4.164688  | 1.892455  | 0.856076  |
| 71 | 1 | 0 | 2.449308  | 2.067048  | 0.665902  |
| 72 | 1 | 0 | 2.851898  | 2.063019  | -1.900405 |
| 73 | 1 | 0 | 4.485150  | 1.581549  | -1.565580 |
| 74 | 8 | 0 | 2.908065  | -3.709761 | 1.897142  |
| 75 | 1 | 0 | 3.850523  | -1.977922 | 2.256024  |
| 76 | 6 | 0 | 1.433144  | -0.322357 | 2.755698  |
| 77 | 1 | 0 | 0.672603  | -1.090355 | 2.909472  |
| 78 | 1 | 0 | 2.384542  | -0.675243 | 3.166254  |
| 79 | 1 | 0 | 1.140794  | 0.579837  | 3.293671  |
| 80 | 6 | 0 | -4.576455 | -3.079513 | 0.196256  |
| 81 | 1 | 0 | -5.585809 | -2.843882 | 0.538884  |
| 82 | 1 | 0 | -4.668389 | -3.556761 | -0.782688 |
| 83 | 1 | 0 | -4.176863 | -3.817200 | 0.892134  |
| 84 | 1 | 0 | 4.788612  | 6.048312  | 0.465502  |
| 85 | 1 | 0 | 3.066017  | 6.196881  | 0.868842  |
| 86 | 1 | 0 | 4.272560  | 6.021721  | 2.179355  |

---

| Center<br>Number | Atomic<br>Number | Atomic<br>Type | Coordinates (Angstroms) |           |           |
|------------------|------------------|----------------|-------------------------|-----------|-----------|
|                  |                  |                | X                       | Y         | Z         |
| 1                | 6                | 0              | -0.894564               | 0.609838  | -0.785323 |
| 2                | 6                | 0              | 0.460206                | 1.163969  | -0.306394 |
| 3                | 1                | 0              | -0.800884               | 0.416730  | -1.854525 |
| 4                | 1                | 0              | -1.655251               | 1.387095  | -0.674816 |
| 5                | 1                | 0              | 0.395405                | 1.534528  | 0.717292  |
| 6                | 1                | 0              | 0.731781                | 2.016337  | -0.935990 |
| 7                | 6                | 0              | 3.626454                | -1.008640 | 0.240232  |
| 8                | 6                | 0              | 2.437555                | -2.010863 | 0.256766  |
| 9                | 6                | 0              | 1.194390                | -1.106705 | 0.536634  |
| 10               | 6                | 0              | 1.514397                | 0.066689  | -0.410903 |
| 11               | 6                | 0              | 2.711563                | -3.171296 | 1.184998  |
| 12               | 1                | 0              | 2.273087                | -2.444367 | -0.730737 |
| 13               | 8                | 0              | 1.213064                | -0.566032 | 1.873231  |
| 14               | 6                | 0              | -1.986702               | -3.042413 | -0.321744 |
| 15               | 6                | 0              | -2.374990               | -1.628284 | -0.855203 |
| 16               | 6                | 0              | -1.352120               | -0.679086 | -0.044984 |
| 17               | 6                | 0              | -0.169534               | -1.647996 | 0.182157  |
| 18               | 6                | 0              | -0.538434               | -2.917887 | 0.045514  |
| 19               | 1                | 0              | -2.577964               | -3.317926 | 0.561336  |
| 20               | 1                | 0              | -2.166475               | -3.825075 | -1.063808 |
| 21               | 6                | 0              | -2.068032               | -1.619223 | -2.365920 |
| 22               | 6                | 0              | -1.926943               | -0.266443 | 1.331311  |
| 23               | 1                | 0              | 0.107635                | -3.774454 | 0.191164  |
| 24               | 1                | 0              | -2.306731               | -0.668570 | -2.843129 |
| 25               | 1                | 0              | -1.013295               | -1.830109 | -2.551125 |
| 26               | 1                | 0              | -2.645145               | -2.394051 | -2.873709 |
| 27               | 1                | 0              | -1.172920               | 0.267371  | 1.908045  |
| 28               | 1                | 0              | -2.792335               | 0.389268  | 1.228844  |
| 29               | 1                | 0              | -2.234319               | -1.133938 | 1.918746  |
| 30               | 6                | 0              | -3.892204               | -1.343540 | -0.607008 |
| 31               | 6                | 0              | -4.362606               | 0.014192  | -1.174464 |
| 32               | 6                | 0              | -5.668412               | 0.539067  | -0.600573 |
| 33               | 6                | 0              | -6.160291               | 1.857632  | -1.216506 |
| 34               | 6                | 0              | -6.856486               | 2.567159  | -0.048823 |
| 35               | 6                | 0              | -6.174242               | 1.957176  | 1.173436  |
| 36               | 8                | 0              | -5.493947               | 0.836453  | 0.815213  |
| 37               | 1                | 0              | -6.451132               | -0.222066 | -0.658334 |
| 38               | 1                | 0              | -6.816496               | 1.684325  | -2.070586 |
| 39               | 1                | 0              | -5.304533               | 2.441752  | -1.564635 |
| 40               | 1                | 0              | -6.657104               | 3.639606  | -0.038864 |
| 41               | 6                | 0              | -8.374326               | 2.345291  | 0.024676  |
| 42               | 1                | 0              | -4.034035               | -1.310599 | 0.474840  |
| 43               | 1                | 0              | -4.497432               | -0.065140 | -2.258947 |
| 44               | 1                | 0              | -3.607570               | 0.785361  | -1.014325 |
| 45               | 8                | 0              | -6.207660               | 2.351102  | 2.304805  |
| 46               | 1                | 0              | -8.780198               | 2.778320  | 0.939843  |
| 47               | 1                | 0              | -8.866100               | 2.817348  | -0.828324 |
| 48               | 1                | 0              | -8.626944               | 1.281815  | 0.013687  |
| 49               | 1                | 0              | 1.405943                | -0.365864 | -1.413139 |
| 50               | 6                | 0              | 3.033052                | 0.387560  | -0.265878 |
| 51               | 6                | 0              | 3.582855                | 0.858862  | -1.621918 |

|    |   |   |           |           |           |
|----|---|---|-----------|-----------|-----------|
| 52 | 6 | 0 | 3.276058  | 1.492372  | 0.796161  |
| 53 | 1 | 0 | 4.672243  | 0.932606  | -1.621195 |
| 54 | 1 | 0 | 3.300554  | 0.183965  | -2.431091 |
| 55 | 1 | 0 | 3.185835  | 1.846768  | -1.862959 |
| 56 | 6 | 0 | 4.729818  | 1.953790  | 0.980074  |
| 57 | 6 | 0 | 5.144897  | 3.109561  | 0.094358  |
| 58 | 8 | 0 | 4.405532  | 3.926278  | -0.397245 |
| 59 | 8 | 0 | 6.488126  | 3.153631  | -0.046338 |
| 60 | 6 | 0 | 7.000295  | 4.262506  | -0.805996 |
| 61 | 6 | 0 | 4.862848  | -1.578883 | -0.440453 |
| 62 | 1 | 0 | 3.905832  | -0.847748 | 1.284348  |
| 63 | 6 | 0 | 6.052890  | -1.515113 | 0.158455  |
| 64 | 6 | 0 | 4.721196  | -2.297951 | -1.761177 |
| 65 | 1 | 0 | 6.943263  | -1.926428 | -0.303291 |
| 66 | 1 | 0 | 6.180911  | -1.057957 | 1.132963  |
| 67 | 1 | 0 | 5.700872  | -2.521054 | -2.185103 |
| 68 | 1 | 0 | 4.194447  | -3.248542 | -1.633273 |
| 69 | 1 | 0 | 4.158081  | -1.720977 | -2.496097 |
| 70 | 1 | 0 | 5.452115  | 1.147042  | 0.859735  |
| 71 | 1 | 0 | 4.863123  | 2.322976  | 2.003538  |
| 72 | 1 | 0 | 2.895864  | 1.134848  | 1.752018  |
| 73 | 1 | 0 | 2.685346  | 2.371995  | 0.533230  |
| 74 | 8 | 0 | 2.379151  | -4.313186 | 0.973756  |
| 75 | 1 | 0 | 3.296271  | -2.928213 | 2.095803  |
| 76 | 6 | 0 | 0.875238  | -1.427246 | 2.952096  |
| 77 | 1 | 0 | 0.069661  | -2.116755 | 2.691748  |
| 78 | 1 | 0 | 1.741035  | -2.004471 | 3.292732  |
| 79 | 1 | 0 | 0.544741  | -0.787707 | 3.771089  |
| 80 | 6 | 0 | -4.799271 | -2.470488 | -1.136034 |
| 81 | 1 | 0 | -5.842567 | -2.284218 | -0.872758 |
| 82 | 1 | 0 | -4.750300 | -2.558185 | -2.224334 |
| 83 | 1 | 0 | -4.537532 | -3.439118 | -0.710052 |
| 84 | 1 | 0 | 6.726862  | 5.206244  | -0.334467 |
| 85 | 1 | 0 | 8.079969  | 4.136137  | -0.812934 |
| 86 | 1 | 0 | 6.604925  | 4.243487  | -1.821241 |

---

| Center<br>Number | Atomic<br>Number | Atomic<br>Type | Coordinates (Angstroms) |           |           |
|------------------|------------------|----------------|-------------------------|-----------|-----------|
|                  |                  |                | X                       | Y         | Z         |
| 1                | 6                | 0              | -0.887572               | 0.070735  | -1.074975 |
| 2                | 6                | 0              | 0.475866                | 0.757613  | -0.874266 |
| 3                | 1                | 0              | -0.866753               | -0.396694 | -2.060017 |
| 4                | 1                | 0              | -1.668954               | 0.834518  | -1.109720 |
| 5                | 1                | 0              | 0.472968                | 1.383787  | 0.019084  |
| 6                | 1                | 0              | 0.653765                | 1.415205  | -1.729268 |
| 7                | 6                | 0              | 3.764445                | -1.165094 | -0.089416 |
| 8                | 6                | 0              | 2.626135                | -2.117174 | 0.329889  |
| 9                | 6                | 0              | 1.366495                | -1.201783 | 0.456157  |
| 10               | 6                | 0              | 1.570677                | -0.301596 | -0.779041 |
| 11               | 6                | 0              | 2.991774                | -2.987894 | 1.511725  |
| 12               | 1                | 0              | 2.382540                | -2.823856 | -0.471733 |
| 13               | 8                | 0              | 1.452152                | -0.324213 | 1.596534  |
| 14               | 6                | 0              | -1.809051               | -3.347527 | 0.393191  |
| 15               | 6                | 0              | -2.293162               | -2.118826 | -0.436821 |
| 16               | 6                | 0              | -1.235719               | -0.984139 | 0.009513  |
| 17               | 6                | 0              | -0.001700               | -1.842317 | 0.366712  |
| 18               | 6                | 0              | -0.341604               | -3.109081 | 0.583474  |
| 19               | 1                | 0              | -2.313621               | -3.400666 | 1.366401  |
| 20               | 1                | 0              | -2.019583               | -4.293467 | -0.112855 |
| 21               | 6                | 0              | -2.121423               | -2.488744 | -1.924142 |
| 22               | 6                | 0              | -1.704108               | -0.240019 | 1.282392  |
| 23               | 1                | 0              | 0.334104                | -3.900660 | 0.882105  |
| 24               | 1                | 0              | -2.426400               | -1.689557 | -2.599859 |
| 25               | 1                | 0              | -1.082133               | -2.734909 | -2.150002 |
| 26               | 1                | 0              | -2.720309               | -3.368385 | -2.166523 |
| 27               | 1                | 0              | -0.921387               | 0.428281  | 1.636894  |
| 28               | 1                | 0              | -2.594437               | 0.361126  | 1.094314  |
| 29               | 1                | 0              | -1.937279               | -0.931361 | 2.094354  |
| 30               | 6                | 0              | -3.792569               | -1.801830 | -0.123599 |
| 31               | 6                | 0              | -4.360893               | -0.630686 | -0.954370 |
| 32               | 6                | 0              | -5.681585               | -0.056798 | -0.445211 |
| 33               | 6                | 0              | -6.184425               | 1.167210  | -1.233547 |
| 34               | 6                | 0              | -5.671493               | 2.361949  | -0.423208 |
| 35               | 6                | 0              | -5.514429               | 1.780661  | 0.978986  |
| 36               | 8                | 0              | -5.527527               | 0.423214  | 0.921499  |
| 37               | 1                | 0              | -6.443083               | -0.833898 | -0.394532 |
| 38               | 1                | 0              | -7.277077               | 1.176602  | -1.254455 |
| 39               | 1                | 0              | -5.831989               | 1.160272  | -2.265335 |
| 40               | 1                | 0              | -4.656093               | 2.623259  | -0.744373 |
| 41               | 6                | 0              | -6.532602               | 3.620600  | -0.449916 |
| 42               | 1                | 0              | -3.840994               | -1.505631 | 0.925726  |
| 43               | 1                | 0              | -4.533432               | -0.957903 | -1.985383 |
| 44               | 1                | 0              | -3.636812               | 0.184778  | -1.009558 |
| 45               | 8                | 0              | -5.382289               | 2.375348  | 2.010962  |
| 46               | 1                | 0              | -6.132367               | 4.371104  | 0.232438  |
| 47               | 1                | 0              | -6.563928               | 4.046320  | -1.454999 |
| 48               | 1                | 0              | -7.557180               | 3.398541  | -0.142326 |
| 49               | 1                | 0              | 1.411442                | -0.977515 | -1.629522 |
| 50               | 6                | 0              | 3.085164                | 0.069431  | -0.848927 |
| 51               | 6                | 0              | 3.490924                | 0.173410  | -2.327190 |

|    |   |   |           |           |           |
|----|---|---|-----------|-----------|-----------|
| 52 | 6 | 0 | 3.510493  | 1.355685  | -0.088451 |
| 53 | 1 | 0 | 4.531585  | 0.484218  | -2.446870 |
| 54 | 1 | 0 | 3.375557  | -0.781833 | -2.839620 |
| 55 | 1 | 0 | 2.866128  | 0.903811  | -2.847348 |
| 56 | 6 | 0 | 3.145846  | 2.712159  | -0.701951 |
| 57 | 6 | 0 | 3.839357  | 3.857613  | 0.004658  |
| 58 | 8 | 0 | 4.891299  | 3.793468  | 0.590740  |
| 59 | 8 | 0 | 3.138092  | 5.006623  | -0.126370 |
| 60 | 6 | 0 | 3.740396  | 6.172752  | 0.462715  |
| 61 | 6 | 0 | 4.931076  | -1.835141 | -0.796296 |
| 62 | 1 | 0 | 4.170335  | -0.765539 | 0.841490  |
| 63 | 6 | 0 | 4.810072  | -2.886710 | -1.604793 |
| 64 | 6 | 0 | 6.283303  | -1.234896 | -0.512112 |
| 65 | 1 | 0 | 5.677658  | -3.324445 | -2.084766 |
| 66 | 1 | 0 | 3.859373  | -3.358594 | -1.823437 |
| 67 | 1 | 0 | 6.511215  | -1.312759 | 0.555391  |
| 68 | 1 | 0 | 7.072859  | -1.737311 | -1.072363 |
| 69 | 1 | 0 | 6.312577  | -0.170017 | -0.762157 |
| 70 | 1 | 0 | 2.075574  | 2.909576  | -0.697569 |
| 71 | 1 | 0 | 3.466065  | 2.773053  | -1.747585 |
| 72 | 1 | 0 | 4.598225  | 1.333544  | 0.008094  |
| 73 | 1 | 0 | 3.115364  | 1.306827  | 0.926688  |
| 74 | 8 | 0 | 4.046878  | -2.949796 | 2.095178  |
| 75 | 1 | 0 | 2.223431  | -3.724762 | 1.820446  |
| 76 | 6 | 0 | 1.279517  | -0.881890 | 2.894051  |
| 77 | 1 | 0 | 2.193864  | -1.358935 | 3.254602  |
| 78 | 1 | 0 | 1.041029  | -0.049295 | 3.556217  |
| 79 | 1 | 0 | 0.457443  | -1.601616 | 2.923801  |
| 80 | 6 | 0 | -4.700498 | -3.037413 | -0.273768 |
| 81 | 1 | 0 | -5.712689 | -2.818665 | 0.071183  |
| 82 | 1 | 0 | -4.774468 | -3.368505 | -1.312690 |
| 83 | 1 | 0 | -4.345106 | -3.878957 | 0.320826  |
| 84 | 1 | 0 | 4.710121  | 6.372247  | 0.007035  |
| 85 | 1 | 0 | 3.049125  | 6.988261  | 0.265627  |
| 86 | 1 | 0 | 3.872635  | 6.031696  | 1.535031  |

---

## Coordinates of conformers at B3LYP/6-31G+(d,p) in the PCM (CHCl<sub>3</sub>)

1

| Center<br>Number | Atomic<br>Number | Atomic<br>Type | Coordinates (Angstroms) |           |           |
|------------------|------------------|----------------|-------------------------|-----------|-----------|
|                  |                  |                | X                       | Y         | Z         |
| 1                | 6                | 0              | -1.086187               | 0.145393  | -1.149989 |
| 2                | 6                | 0              | 0.309409                | 0.798067  | -1.051480 |
| 3                | 1                | 0              | -1.111393               | -0.415812 | -2.088103 |
| 4                | 1                | 0              | -1.842344               | 0.933797  | -1.237700 |
| 5                | 1                | 0              | 0.358283                | 1.505040  | -0.218361 |
| 6                | 1                | 0              | 0.492094                | 1.371400  | -1.968617 |
| 7                | 6                | 0              | 3.556225                | -1.168552 | -0.193426 |
| 8                | 6                | 0              | 2.386393                | -2.063946 | 0.311950  |
| 9                | 6                | 0              | 1.174181                | -1.076507 | 0.427968  |
| 10               | 6                | 0              | 1.364402                | -0.297209 | -0.892340 |
| 11               | 6                | 0              | 2.802960                | -2.862841 | 1.525638  |
| 12               | 1                | 0              | 2.087693                | -2.794171 | -0.443890 |
| 13               | 8                | 0              | 1.357361                | -0.122988 | 1.496900  |
| 14               | 6                | 0              | -2.087806               | -3.074407 | 0.704016  |
| 15               | 6                | 0              | -2.547782               | -1.922599 | -0.249599 |
| 16               | 6                | 0              | -1.435162               | -0.789607 | 0.045491  |
| 17               | 6                | 0              | -0.221658               | -1.661862 | 0.450149  |
| 18               | 6                | 0              | -0.600885               | -2.888766 | 0.823662  |
| 19               | 1                | 0              | -2.561798               | -2.990039 | 1.694110  |
| 20               | 1                | 0              | -2.359057               | -4.063831 | 0.318116  |
| 21               | 6                | 0              | -2.430701               | -2.458828 | -1.694853 |
| 22               | 6                | 0              | -1.828546               | 0.096082  | 1.256875  |
| 23               | 1                | 0              | 0.065178                | -3.665001 | 1.185800  |
| 24               | 1                | 0              | -2.733756               | -1.727584 | -2.448779 |
| 25               | 1                | 0              | -1.402989               | -2.761333 | -1.918361 |
| 26               | 1                | 0              | -3.064075               | -3.341891 | -1.822253 |
| 27               | 1                | 0              | -1.002055               | 0.757709  | 1.523916  |
| 28               | 1                | 0              | -2.696673               | 0.722501  | 1.033102  |
| 29               | 1                | 0              | -2.067695               | -0.505736 | 2.139125  |
| 30               | 6                | 0              | -4.027679               | -1.510271 | 0.062471  |
| 31               | 6                | 0              | -4.565814               | -0.399081 | -0.870265 |
| 32               | 6                | 0              | -5.871636               | 0.260586  | -0.422433 |
| 33               | 6                | 0              | -6.324418               | 1.438661  | -1.309191 |
| 34               | 6                | 0              | -5.763787               | 2.677603  | -0.593949 |
| 35               | 6                | 0              | -5.652095               | 2.206415  | 0.852131  |
| 36               | 8                | 0              | -5.706823               | 0.855170  | 0.910900  |
| 37               | 1                | 0              | -6.663323               | -0.481415 | -0.305630 |
| 38               | 1                | 0              | -7.418381               | 1.489791  | -1.337371 |
| 39               | 1                | 0              | -5.965598               | 1.337024  | -2.336380 |
| 40               | 1                | 0              | -4.730496               | 2.862593  | -0.920801 |
| 41               | 6                | 0              | -6.566448               | 3.970114  | -0.749547 |
| 42               | 1                | 0              | -4.036838               | -1.114400 | 1.083057  |
| 43               | 1                | 0              | -4.756201               | -0.813638 | -1.868819 |
| 44               | 1                | 0              | -3.816936               | 0.387423  | -1.004045 |
| 45               | 8                | 0              | -5.517654               | 2.882621  | 1.851147  |
| 46               | 1                | 0              | -6.128629               | 4.771679  | -0.148569 |
| 47               | 1                | 0              | -6.574362               | 4.288796  | -1.796317 |
| 48               | 1                | 0              | -7.603453               | 3.828180  | -0.427331 |
| 49               | 1                | 0              | 1.151775                | -1.040222 | -1.674661 |
| 50               | 6                | 0              | 2.887543                | 0.024454  | -1.031991 |

|    |   |   |           |           |           |
|----|---|---|-----------|-----------|-----------|
| 51 | 6 | 0 | 3.260945  | 0.006983  | -2.526430 |
| 52 | 6 | 0 | 3.200631  | 1.420004  | -0.423274 |
| 53 | 1 | 0 | 4.325355  | 0.189474  | -2.698444 |
| 54 | 1 | 0 | 3.019577  | -0.954976 | -2.987242 |
| 55 | 1 | 0 | 2.703000  | 0.786374  | -3.058516 |
| 56 | 6 | 0 | 4.667212  | 1.863156  | -0.424111 |
| 57 | 6 | 0 | 4.853867  | 3.270687  | 0.105201  |
| 58 | 8 | 0 | 3.983965  | 4.116248  | 0.214315  |
| 59 | 8 | 0 | 6.144619  | 3.500212  | 0.430413  |
| 60 | 6 | 0 | 6.465405  | 4.828238  | 0.899143  |
| 61 | 6 | 0 | 4.679597  | -1.960164 | -0.863242 |
| 62 | 1 | 0 | 3.995917  | -0.705836 | 0.700428  |
| 63 | 6 | 0 | 4.489973  | -3.122792 | -1.506325 |
| 64 | 6 | 0 | 6.074821  | -1.386554 | -0.749718 |
| 65 | 1 | 0 | 5.326050  | -3.648151 | -1.960073 |
| 66 | 1 | 0 | 3.518658  | -3.594084 | -1.613398 |
| 67 | 1 | 0 | 6.169365  | -0.434165 | -1.282746 |
| 68 | 1 | 0 | 6.334889  | -1.189235 | 0.298158  |
| 69 | 1 | 0 | 6.818785  | -2.073214 | -1.162415 |
| 70 | 1 | 0 | 5.092460  | 1.864458  | -1.436166 |
| 71 | 1 | 0 | 5.301854  | 1.200772  | 0.170642  |
| 72 | 1 | 0 | 2.827826  | 1.444254  | 0.603051  |
| 73 | 1 | 0 | 2.625720  | 2.168621  | -0.977964 |
| 74 | 8 | 0 | 2.420792  | -3.993465 | 1.777533  |
| 75 | 1 | 0 | 3.539349  | -2.373290 | 2.196054  |
| 76 | 6 | 0 | 1.168213  | -0.564344 | 2.837633  |
| 77 | 1 | 0 | 1.066162  | 0.337831  | 3.445561  |
| 78 | 1 | 0 | 0.267226  | -1.175899 | 2.948116  |
| 79 | 1 | 0 | 2.032309  | -1.132220 | 3.205848  |
| 80 | 6 | 0 | -4.992064 | -2.716705 | 0.054889  |
| 81 | 1 | 0 | -5.982173 | -2.425325 | 0.418807  |
| 82 | 1 | 0 | -5.122676 | -3.132499 | -0.950491 |
| 83 | 1 | 0 | -4.643103 | -3.520802 | 0.707514  |
| 84 | 1 | 0 | 5.908002  | 5.053937  | 1.810766  |
| 85 | 1 | 0 | 7.535976  | 4.813257  | 1.098722  |
| 86 | 1 | 0 | 6.227774  | 5.569024  | 0.132581  |

---



2

| Center<br>Number | Atomic<br>Number | Atomic<br>Type | Coordinates (Angstroms) |           |           |
|------------------|------------------|----------------|-------------------------|-----------|-----------|
|                  |                  |                | X                       | Y         | Z         |
| 1                | 6                | 0              | -0.821828               | 0.153939  | -1.055909 |
| 2                | 6                | 0              | 0.548310                | 0.821810  | -0.807185 |
| 3                | 1                | 0              | -0.789982               | -0.266699 | -2.064790 |
| 4                | 1                | 0              | -1.598012               | 0.927546  | -1.065614 |
| 5                | 1                | 0              | 0.541768                | 1.412727  | 0.114046  |
| 6                | 1                | 0              | 0.739058                | 1.512397  | -1.636219 |
| 7                | 6                | 0              | 3.801985                | -1.130115 | 0.018385  |
| 8                | 6                | 0              | 2.658113                | -2.149205 | 0.248513  |
| 9                | 6                | 0              | 1.403117                | -1.222290 | 0.430299  |
| 10               | 6                | 0              | 1.636037                | -0.253285 | -0.750566 |
| 11               | 6                | 0              | 3.015081                | -3.129188 | 1.343581  |
| 12               | 1                | 0              | 2.452557                | -2.745859 | -0.645554 |
| 13               | 8                | 0              | 1.499548                | -0.418950 | 1.626945  |
| 14               | 6                | 0              | -1.795399               | -3.328354 | 0.249760  |
| 15               | 6                | 0              | -2.256657               | -2.056377 | -0.535609 |
| 16               | 6                | 0              | -1.192587               | -0.953078 | -0.026544 |
| 17               | 6                | 0              | 0.030083                | -1.843209 | 0.298699  |
| 18               | 6                | 0              | -0.321991               | -3.122949 | 0.462920  |
| 19               | 1                | 0              | -2.310278               | -3.411379 | 1.219094  |
| 20               | 1                | 0              | -2.016928               | -4.253301 | -0.295123 |
| 21               | 6                | 0              | -2.066616               | -2.363108 | -2.039143 |
| 22               | 6                | 0              | -1.665731               | -0.265240 | 1.281176  |
| 23               | 1                | 0              | 0.355088                | -3.926713 | 0.731756  |
| 24               | 1                | 0              | -2.361532               | -1.532803 | -2.685929 |
| 25               | 1                | 0              | -1.021864               | -2.602269 | -2.260691 |
| 26               | 1                | 0              | -2.665610               | -3.232198 | -2.327460 |
| 27               | 1                | 0              | -0.875929               | 0.376638  | 1.676471  |
| 28               | 1                | 0              | -2.547941               | 0.358469  | 1.111452  |
| 29               | 1                | 0              | -1.916378               | -0.995903 | 2.056437  |
| 30               | 6                | 0              | -3.760864               | -1.738038 | -0.227516 |
| 31               | 6                | 0              | -4.298418               | -0.507805 | -0.996855 |
| 32               | 6                | 0              | -5.666842               | 0.005973  | -0.545521 |
| 33               | 6                | 0              | -6.123645               | 1.299576  | -1.250013 |
| 34               | 6                | 0              | -5.676752               | 2.417518  | -0.295544 |
| 35               | 6                | 0              | -5.639907               | 1.707971  | 1.054127  |
| 36               | 8                | 0              | -5.628201               | 0.366110  | 0.878455  |
| 37               | 1                | 0              | -6.421701               | -0.778451 | -0.618859 |
| 38               | 1                | 0              | -7.214777               | 1.309478  | -1.347590 |
| 39               | 1                | 0              | -5.695508               | 1.392355  | -2.251177 |
| 40               | 1                | 0              | -4.634103               | 2.694751  | -0.507605 |
| 41               | 6                | 0              | -6.531245               | 3.685914  | -0.291094 |
| 42               | 1                | 0              | -3.822996               | -1.507630 | 0.841184  |
| 43               | 1                | 0              | -4.398003               | -0.752201 | -2.062383 |
| 44               | 1                | 0              | -3.587070               | 0.321836  | -0.936764 |
| 45               | 8                | 0              | -5.609024               | 2.206194  | 2.160634  |
| 46               | 1                | 0              | -6.178098               | 4.387626  | 0.469341  |
| 47               | 1                | 0              | -6.481915               | 4.180151  | -1.266088 |
| 48               | 1                | 0              | -7.579752               | 3.451183  | -0.079365 |
| 49               | 1                | 0              | 1.482882                | -0.878626 | -1.642040 |
| 50               | 6                | 0              | 3.159976                | 0.108296  | -0.768199 |
| 51               | 6                | 0              | 3.624209                | 0.183426  | -2.235573 |

|    |   |   |           |           |           |
|----|---|---|-----------|-----------|-----------|
| 52 | 6 | 0 | 3.549122  | 1.403480  | 0.002951  |
| 53 | 1 | 0 | 4.665748  | 0.508700  | -2.327278 |
| 54 | 1 | 0 | 3.537892  | -0.790749 | -2.725479 |
| 55 | 1 | 0 | 3.006107  | 0.891059  | -2.799087 |
| 56 | 6 | 0 | 3.280739  | 2.747631  | -0.687035 |
| 57 | 6 | 0 | 3.826000  | 3.922375  | 0.098977  |
| 58 | 8 | 0 | 4.652665  | 3.865384  | 0.992182  |
| 59 | 8 | 0 | 3.293416  | 5.085906  | -0.333223 |
| 60 | 6 | 0 | 3.773144  | 6.290522  | 0.303190  |
| 61 | 6 | 0 | 5.089352  | -1.714378 | -0.545471 |
| 62 | 1 | 0 | 4.056552  | -0.742849 | 1.014168  |
| 63 | 6 | 0 | 5.149840  | -2.877930 | -1.211689 |
| 64 | 6 | 0 | 6.349564  | -0.922269 | -0.274633 |
| 65 | 1 | 0 | 6.098396  | -3.258661 | -1.581031 |
| 66 | 1 | 0 | 4.277791  | -3.491074 | -1.413755 |
| 67 | 1 | 0 | 6.307700  | 0.077050  | -0.722688 |
| 68 | 1 | 0 | 6.491976  | -0.774640 | 0.803500  |
| 69 | 1 | 0 | 7.232207  | -1.431249 | -0.671400 |
| 70 | 1 | 0 | 2.219038  | 2.931056  | -0.864196 |
| 71 | 1 | 0 | 3.763324  | 2.793201  | -1.671687 |
| 72 | 1 | 0 | 4.622974  | 1.359022  | 0.211169  |
| 73 | 1 | 0 | 3.050203  | 1.390046  | 0.975867  |
| 74 | 8 | 0 | 2.647052  | -4.291555 | 1.383299  |
| 75 | 1 | 0 | 3.690850  | -2.743998 | 2.134359  |
| 76 | 6 | 0 | 1.290677  | -1.054848 | 2.884324  |
| 77 | 1 | 0 | 1.073219  | -0.259307 | 3.601117  |
| 78 | 1 | 0 | 0.448854  | -1.754304 | 2.857709  |
| 79 | 1 | 0 | 2.188775  | -1.587107 | 3.223157  |
| 80 | 6 | 0 | -4.681379 | -2.954731 | -0.467837 |
| 81 | 1 | 0 | -5.689322 | -2.760538 | -0.089003 |
| 82 | 1 | 0 | -4.772838 | -3.196813 | -1.532694 |
| 83 | 1 | 0 | -4.319558 | -3.846700 | 0.049269  |
| 84 | 1 | 0 | 4.849787  | 6.396094  | 0.153085  |
| 85 | 1 | 0 | 3.237023  | 7.105883  | -0.180484 |
| 86 | 1 | 0 | 3.553746  | 6.267828  | 1.372705  |

---

## 3

| Center<br>Number | Atomic<br>Number | Atomic<br>Type | Coordinates (Angstroms) |           |           |
|------------------|------------------|----------------|-------------------------|-----------|-----------|
|                  |                  |                | X                       | Y         | Z         |
| 1                | 6                | 0              | -1.052220               | 0.069589  | -1.179980 |
| 2                | 6                | 0              | 0.325530                | 0.764189  | -1.130240 |
| 3                | 1                | 0              | -1.073640               | -0.531321 | -2.093370 |
| 4                | 1                | 0              | -1.831600               | 0.832149  | -1.289800 |
| 5                | 1                | 0              | 0.366260                | 1.504299  | -0.325980 |
| 6                | 1                | 0              | 0.477360                | 1.304969  | -2.072350 |
| 7                | 6                | 0              | 3.638430                | -1.073180 | -0.238330 |
| 8                | 6                | 0              | 2.501380                | -1.982620 | 0.313370  |
| 9                | 6                | 0              | 1.263100                | -1.026000 | 0.408730  |
| 10               | 6                | 0              | 1.412970                | -0.295030 | -0.944010 |
| 11               | 6                | 0              | 2.954750                | -2.727640 | 1.548450  |
| 12               | 1                | 0              | 2.213820                | -2.747240 | -0.412450 |
| 13               | 8                | 0              | 1.434150                | -0.024570 | 1.435440  |
| 14               | 6                | 0              | -1.939810               | -3.095091 | 0.819100  |
| 15               | 6                | 0              | -2.446300               | -1.994321 | -0.170000 |
| 16               | 6                | 0              | -1.357850               | -0.823271 | 0.058880  |
| 17               | 6                | 0              | -0.115510               | -1.647041 | 0.476700  |
| 18               | 6                | 0              | -0.456380               | -2.867751 | 0.903980  |
| 19               | 1                | 0              | -2.397590               | -2.983941 | 1.814120  |
| 20               | 1                | 0              | -2.192310               | -4.105371 | 0.477100  |
| 21               | 6                | 0              | -2.340510               | -2.584431 | -1.595060 |
| 22               | 6                | 0              | -1.753360               | 0.100999  | 1.240330  |
| 23               | 1                | 0              | 0.235450                | -3.612221 | 1.284070  |
| 24               | 1                | 0              | -2.673360               | -1.890461 | -2.371260 |
| 25               | 1                | 0              | -1.309370               | -2.870431 | -1.824330 |
| 26               | 1                | 0              | -2.953760               | -3.486851 | -1.677680 |
| 27               | 1                | 0              | -0.942460               | 0.797619  | 1.462920  |
| 28               | 1                | 0              | -2.644800               | 0.690959  | 1.010130  |
| 29               | 1                | 0              | -1.955930               | -0.470901 | 2.151140  |
| 30               | 6                | 0              | -3.930770               | -1.606371 | 0.152570  |
| 31               | 6                | 0              | -4.515100               | -0.553421 | -0.819430 |
| 32               | 6                | 0              | -5.825050               | 0.098689  | -0.373210 |
| 33               | 6                | 0              | -6.335130               | 1.208719  | -1.314840 |
| 34               | 6                | 0              | -5.790010               | 2.503449  | -0.692070 |
| 35               | 6                | 0              | -5.619770               | 2.123069  | 0.775090  |
| 36               | 8                | 0              | -5.637920               | 0.777279  | 0.916460  |
| 37               | 1                | 0              | -6.592420               | -0.654721 | -0.187590 |
| 38               | 1                | 0              | -7.430390               | 1.229309  | -1.313760 |
| 39               | 1                | 0              | -6.002470               | 1.054319  | -2.344280 |
| 40               | 1                | 0              | -4.773301               | 2.698009  | -1.062450 |
| 41               | 6                | 0              | -6.636221               | 3.760819  | -0.897770 |
| 42               | 1                | 0              | -3.931850               | -1.164571 | 1.154340  |
| 43               | 1                | 0              | -4.717890               | -1.020171 | -1.792120 |
| 44               | 1                | 0              | -3.787470               | 0.241809  | -1.008030 |
| 45               | 8                | 0              | -5.469871               | 2.861589  | 1.726770  |
| 46               | 1                | 0              | -6.205211               | 4.609599  | -0.359990 |
| 47               | 1                | 0              | -6.685861               | 4.015189  | -1.960840 |
| 48               | 1                | 0              | -7.658111               | 3.608549  | -0.534510 |
| 49               | 1                | 0              | 1.211050                | -1.073330 | -1.694070 |
| 50               | 6                | 0              | 2.925410                | 0.061440  | -1.118160 |
| 51               | 6                | 0              | 3.281050                | -0.007230 | -2.614920 |

|    |   |   |           |           |           |
|----|---|---|-----------|-----------|-----------|
| 52 | 6 | 0 | 3.202750  | 1.490860  | -0.572640 |
| 53 | 1 | 0 | 4.334840  | 0.209790  | -2.809670 |
| 54 | 1 | 0 | 3.071990  | -0.997970 | -3.027860 |
| 55 | 1 | 0 | 2.686380  | 0.725260  | -3.173010 |
| 56 | 6 | 0 | 4.668320  | 1.980280  | -0.608540 |
| 57 | 6 | 0 | 4.745749  | 3.414060  | -0.136210 |
| 58 | 8 | 0 | 4.548439  | 4.391530  | -0.838760 |
| 59 | 8 | 0 | 5.029639  | 3.500820  | 1.179750  |
| 60 | 6 | 0 | 5.072439  | 4.830020  | 1.744420  |
| 61 | 6 | 0 | 4.781270  | -1.854950 | -0.886190 |
| 62 | 1 | 0 | 4.069630  | -0.560680 | 0.631890  |
| 63 | 6 | 0 | 4.625100  | -3.052540 | -1.471500 |
| 64 | 6 | 0 | 6.156230  | -1.228340 | -0.816850 |
| 65 | 1 | 0 | 5.473750  | -3.569480 | -1.911310 |
| 66 | 1 | 0 | 3.669910  | -3.561830 | -1.543210 |
| 67 | 1 | 0 | 6.918570  | -1.904440 | -1.212880 |
| 68 | 1 | 0 | 6.209080  | -0.295500 | -1.388670 |
| 69 | 1 | 0 | 6.422840  | -0.979770 | 0.218400  |
| 70 | 1 | 0 | 5.064500  | 1.961340  | -1.627020 |
| 71 | 1 | 0 | 5.301780  | 1.362000  | 0.030550  |
| 72 | 1 | 0 | 2.840880  | 1.547000  | 0.456600  |
| 73 | 1 | 0 | 2.605210  | 2.195590  | -1.162180 |
| 74 | 8 | 0 | 2.596230  | -3.853670 | 1.850300  |
| 75 | 1 | 0 | 3.695290  | -2.201450 | 2.185470  |
| 76 | 6 | 0 | 1.289400  | -0.419560 | 2.795960  |
| 77 | 1 | 0 | 1.156720  | 0.500380  | 3.370440  |
| 78 | 1 | 0 | 0.419650  | -1.066461 | 2.947760  |
| 79 | 1 | 0 | 2.185740  | -0.931730 | 3.168440  |
| 80 | 6 | 0 | -4.862840 | -2.836091 | 0.218140  |
| 81 | 1 | 0 | -5.855730 | -2.552271 | 0.580540  |
| 82 | 1 | 0 | -4.995290 | -3.304561 | -0.763530 |
| 83 | 1 | 0 | -4.485570 | -3.597521 | 0.905260  |
| 84 | 1 | 0 | 4.104989  | 5.322800  | 1.626880  |
| 85 | 1 | 0 | 5.305749  | 4.688660  | 2.798720  |
| 86 | 1 | 0 | 5.847339  | 5.423970  | 1.255250  |

---

| Center<br>Number | Atomic<br>Number | Atomic<br>Type | Coordinates (Angstroms) |           |           |
|------------------|------------------|----------------|-------------------------|-----------|-----------|
|                  |                  |                | X                       | Y         | Z         |
| 1                | 6                | 0              | -0.894205               | 0.018072  | -1.196963 |
| 2                | 6                | 0              | 0.477859                | 0.728825  | -1.183647 |
| 3                | 1                | 0              | -0.931249               | -0.575704 | -2.114236 |
| 4                | 1                | 0              | -1.685810               | 0.770990  | -1.281787 |
| 5                | 1                | 0              | 0.525200                | 1.487423  | -0.397173 |
| 6                | 1                | 0              | 0.606319                | 1.249137  | -2.140150 |
| 7                | 6                | 0              | 3.824304                | -0.928910 | -0.203831 |
| 8                | 6                | 0              | 2.746033                | -1.916691 | 0.315205  |
| 9                | 6                | 0              | 1.461420                | -1.013662 | 0.378597  |
| 10               | 6                | 0              | 1.571767                | -0.323175 | -0.998358 |
| 11               | 6                | 0              | 3.202845                | -2.626410 | 1.569961  |
| 12               | 1                | 0              | 2.523225                | -2.697856 | -0.418939 |
| 13               | 8                | 0              | 1.594238                | 0.024003  | 1.373247  |
| 14               | 6                | 0              | -1.675296               | -3.175467 | 0.810668  |
| 15               | 6                | 0              | -2.210496               | -2.097910 | -0.189416 |
| 16               | 6                | 0              | -1.163625               | -0.889806 | 0.041609  |
| 17               | 6                | 0              | 0.103901                | -1.674341 | 0.464976  |
| 18               | 6                | 0              | -0.200177               | -2.901340 | 0.900973  |
| 19               | 1                | 0              | -2.143640               | -3.073357 | 1.801788  |
| 20               | 1                | 0              | -1.892282               | -4.195473 | 0.473306  |
| 21               | 6                | 0              | -2.071090               | -2.694433 | -1.609049 |
| 22               | 6                | 0              | -1.593351               | 0.018390  | 1.223814  |
| 23               | 1                | 0              | 0.514323                | -3.620876 | 1.286958  |
| 24               | 1                | 0              | -2.424436               | -2.021107 | -2.394127 |
| 25               | 1                | 0              | -1.027946               | -2.942032 | -1.828276 |
| 26               | 1                | 0              | -2.648662               | -3.620331 | -1.687504 |
| 27               | 1                | 0              | -0.813260               | 0.751832  | 1.438655  |
| 28               | 1                | 0              | -2.510703               | 0.568353  | 0.996652  |
| 29               | 1                | 0              | -1.765671               | -0.559267 | 2.137135  |
| 30               | 6                | 0              | -3.711017               | -1.762022 | 0.119107  |
| 31               | 6                | 0              | -4.317758               | -0.715469 | -0.845449 |
| 32               | 6                | 0              | -5.696624               | -0.179395 | -0.455932 |
| 33               | 6                | 0              | -6.220691               | 0.947946  | -1.368882 |
| 34               | 6                | 0              | -5.815708               | 2.237205  | -0.637476 |
| 35               | 6                | 0              | -5.713309               | 1.781206  | 0.814331  |
| 36               | 8                | 0              | -5.644028               | 0.431321  | 0.879040  |
| 37               | 1                | 0              | -6.419152               | -0.992186 | -0.368072 |
| 38               | 1                | 0              | -7.311971               | 0.892625  | -1.446317 |
| 39               | 1                | 0              | -5.808020               | 0.879727  | -2.378464 |
| 40               | 1                | 0              | -4.794933               | 2.526644  | -0.925309 |
| 41               | 6                | 0              | -6.738933               | 3.441539  | -0.829633 |
| 42               | 1                | 0              | -3.738478               | -1.333542 | 1.126382  |
| 43               | 1                | 0              | -4.430985               | -1.154023 | -1.845341 |
| 44               | 1                | 0              | -3.641667               | 0.137569  | -0.959785 |
| 45               | 8                | 0              | -5.679484               | 2.469657  | 1.813663  |
| 46               | 1                | 0              | -6.406320               | 4.285188  | -0.218927 |
| 47               | 1                | 0              | -6.741108               | 3.754572  | -1.878120 |
| 48               | 1                | 0              | -7.767313               | 3.196371  | -0.543795 |
| 49               | 1                | 0              | 1.320720                | -1.126388 | -1.704788 |
| 50               | 6                | 0              | 3.086526                | -0.010010 | -1.274225 |
| 51               | 6                | 0              | 3.390280                | -0.460162 | -2.721198 |

|    |   |   |           |           |           |
|----|---|---|-----------|-----------|-----------|
| 52 | 6 | 0 | 3.471867  | 1.493738  | -1.200538 |
| 53 | 1 | 0 | 4.430663  | -0.271242 | -3.003126 |
| 54 | 1 | 0 | 3.198617  | -1.528685 | -2.858021 |
| 55 | 1 | 0 | 2.751351  | 0.088735  | -3.423271 |
| 56 | 6 | 0 | 3.442496  | 2.204150  | 0.156785  |
| 57 | 6 | 0 | 3.617390  | 3.702142  | 0.036125  |
| 58 | 8 | 0 | 3.516940  | 4.358840  | -0.986000 |
| 59 | 8 | 0 | 3.884780  | 4.258021  | 1.238322  |
| 60 | 6 | 0 | 4.023861  | 5.694916  | 1.268922  |
| 61 | 6 | 0 | 5.138165  | -1.564405 | -0.633053 |
| 62 | 1 | 0 | 4.064664  | -0.284753 | 0.651011  |
| 63 | 6 | 0 | 5.270307  | -2.862158 | -0.948029 |
| 64 | 6 | 0 | 6.338435  | -0.644183 | -0.648780 |
| 65 | 1 | 0 | 6.236105  | -3.269636 | -1.234823 |
| 66 | 1 | 0 | 4.440679  | -3.561450 | -0.936534 |
| 67 | 1 | 0 | 7.248193  | -1.179208 | -0.934050 |
| 68 | 1 | 0 | 6.202458  | 0.187474  | -1.349647 |
| 69 | 1 | 0 | 6.498996  | -0.196635 | 0.340507  |
| 70 | 1 | 0 | 4.220469  | 1.838223  | 0.834247  |
| 71 | 1 | 0 | 2.498321  | 2.027352  | 0.682113  |
| 72 | 1 | 0 | 2.812767  | 2.036517  | -1.885968 |
| 73 | 1 | 0 | 4.477325  | 1.610706  | -1.621624 |
| 74 | 8 | 0 | 2.863032  | -3.752716 | 1.892607  |
| 75 | 1 | 0 | 3.922513  | -2.070668 | 2.205006  |
| 76 | 6 | 0 | 1.476442  | -0.336163 | 2.746480  |
| 77 | 1 | 0 | 1.288752  | 0.590824  | 3.293715  |
| 78 | 1 | 0 | 0.647866  | -1.029879 | 2.920286  |
| 79 | 1 | 0 | 2.403139  | -0.780949 | 3.130598  |
| 80 | 6 | 0 | -4.601003 | -3.023829 | 0.159051  |
| 81 | 1 | 0 | -5.596170 | -2.785228 | 0.546327  |
| 82 | 1 | 0 | -4.733352 | -3.465338 | -0.835186 |
| 83 | 1 | 0 | -4.187278 | -3.793498 | 0.815145  |
| 84 | 1 | 0 | 4.852296  | 6.010208  | 0.630852  |
| 85 | 1 | 0 | 3.101278  | 6.173353  | 0.932968  |
| 86 | 1 | 0 | 4.226664  | 5.943360  | 2.309808  |

---

## 5

| Center<br>Number | Atomic<br>Number | Atomic<br>Type | Coordinates (Angstroms) |           |           |
|------------------|------------------|----------------|-------------------------|-----------|-----------|
|                  |                  |                | X                       | Y         | Z         |
| 1                | 6                | 0              | -1.022274               | 0.154094  | -1.108582 |
| 2                | 6                | 0              | 0.360775                | 0.825180  | -0.967436 |
| 3                | 1                | 0              | -1.030667               | -0.361871 | -2.072483 |
| 4                | 1                | 0              | -1.791852               | 0.932241  | -1.164120 |
| 5                | 1                | 0              | 0.390017                | 1.490572  | -0.099789 |
| 6                | 1                | 0              | 0.539931                | 1.445325  | -1.854394 |
| 7                | 6                | 0              | 3.635614                | -1.126056 | -0.178350 |
| 8                | 6                | 0              | 2.477340                | -2.060657 | 0.280855  |
| 9                | 6                | 0              | 1.247417                | -1.099704 | 0.431220  |
| 10               | 6                | 0              | 1.433276                | -0.258764 | -0.851191 |
| 11               | 6                | 0              | 2.899833                | -2.905413 | 1.461288  |
| 12               | 1                | 0              | 2.194675                | -2.761884 | -0.507975 |
| 13               | 8                | 0              | 1.406060                | -0.190980 | 1.541659  |
| 14               | 6                | 0              | -1.977581               | -3.169782 | 0.578944  |
| 15               | 6                | 0              | -2.451628               | -1.981665 | -0.321680 |
| 16               | 6                | 0              | -1.363738               | -0.842796 | 0.038011  |
| 17               | 6                | 0              | -0.137903               | -1.710074 | 0.413994  |
| 18               | 6                | 0              | -0.496165               | -2.960642 | 0.723904  |
| 19               | 1                | 0              | -2.462984               | -3.145190 | 1.566686  |
| 20               | 1                | 0              | -2.224575               | -4.144022 | 0.141410  |
| 21               | 6                | 0              | -2.311460               | -2.444703 | -1.790167 |
| 22               | 6                | 0              | -1.787952               | -0.021901 | 1.283967  |
| 23               | 1                | 0              | 0.182519                | -3.739738 | 1.055272  |
| 24               | 1                | 0              | -2.618315               | -1.681988 | -2.510572 |
| 25               | 1                | 0              | -1.276934               | -2.720431 | -2.017009 |
| 26               | 1                | 0              | -2.929270               | -3.330073 | -1.967250 |
| 27               | 1                | 0              | -0.976567               | 0.640189  | 1.592700  |
| 28               | 1                | 0              | -2.664138               | 0.599325  | 1.077471  |
| 29               | 1                | 0              | -2.027557               | -0.668123 | 2.134133  |
| 30               | 6                | 0              | -3.942587               | -1.613272 | -0.006021 |
| 31               | 6                | 0              | -4.495815               | -0.476781 | -0.899386 |
| 32               | 6                | 0              | -5.801062               | 0.161748  | -0.420642 |
| 33               | 6                | 0              | -6.282755               | 1.344684  | -1.285310 |
| 34               | 6                | 0              | -5.719506               | 2.580981  | -0.567735 |
| 35               | 6                | 0              | -5.577019               | 2.095623  | 0.871007  |
| 36               | 8                | 0              | -5.618887               | 0.743350  | 0.916290  |
| 37               | 1                | 0              | -6.581950               | -0.590666 | -0.297723 |
| 38               | 1                | 0              | -7.377480               | 1.385623  | -1.291112 |
| 39               | 1                | 0              | -5.943616               | 1.257561  | -2.320462 |
| 40               | 1                | 0              | -4.693900               | 2.777840  | -0.911609 |
| 41               | 6                | 0              | -6.535338               | 3.868274  | -0.695459 |
| 42               | 1                | 0              | -3.969642               | -1.260226 | 1.029833  |
| 43               | 1                | 0              | -4.692191               | -0.863160 | -1.908035 |
| 44               | 1                | 0              | -3.753105               | 0.318311  | -1.016205 |
| 45               | 8                | 0              | -5.429437               | 2.762590  | 1.874369  |
| 46               | 1                | 0              | -6.093742               | 4.667275  | -0.093797 |
| 47               | 1                | 0              | -6.564334               | 4.197839  | -1.738493 |
| 48               | 1                | 0              | -7.565327               | 3.714263  | -0.356787 |
| 49               | 1                | 0              | 1.238839                | -0.967938 | -1.668709 |
| 50               | 6                | 0              | 2.952299                | 0.092574  | -0.964741 |
| 51               | 6                | 0              | 3.335164                | 0.155691  | -2.455336 |

|    |   |   |           |           |           |
|----|---|---|-----------|-----------|-----------|
| 52 | 6 | 0 | 3.237620  | 1.460350  | -0.282950 |
| 53 | 1 | 0 | 4.396947  | 0.364891  | -2.612101 |
| 54 | 1 | 0 | 3.112751  | -0.786670 | -2.963720 |
| 55 | 1 | 0 | 2.766456  | 0.950187  | -2.952420 |
| 56 | 6 | 0 | 4.710597  | 1.926466  | -0.249768 |
| 57 | 6 | 0 | 4.819157  | 3.259973  | 0.453246  |
| 58 | 8 | 0 | 4.938077  | 3.407899  | 1.657993  |
| 59 | 8 | 0 | 4.737304  | 4.294630  | -0.409259 |
| 60 | 6 | 0 | 4.778893  | 5.619276  | 0.165798  |
| 61 | 6 | 0 | 4.772804  | -1.868161 | -0.880977 |
| 62 | 1 | 0 | 4.066808  | -0.697779 | 0.736331  |
| 63 | 6 | 0 | 4.603151  | -3.003949 | -1.575381 |
| 64 | 6 | 0 | 6.157909  | -1.276776 | -0.739284 |
| 65 | 1 | 0 | 5.448312  | -3.494813 | -2.050355 |
| 66 | 1 | 0 | 3.640078  | -3.486542 | -1.704165 |
| 67 | 1 | 0 | 6.913039  | -1.928498 | -1.186837 |
| 68 | 1 | 0 | 6.234722  | -0.296855 | -1.223160 |
| 69 | 1 | 0 | 6.415881  | -1.128824 | 0.317165  |
| 70 | 1 | 0 | 5.117782  | 2.023507  | -1.259036 |
| 71 | 1 | 0 | 5.324026  | 1.221765  | 0.315139  |
| 72 | 1 | 0 | 2.861820  | 1.422283  | 0.741747  |
| 73 | 1 | 0 | 2.656308  | 2.225674  | -0.810586 |
| 74 | 8 | 0 | 2.531564  | -4.050889 | 1.661482  |
| 75 | 1 | 0 | 3.626412  | -2.435518 | 2.155847  |
| 76 | 6 | 0 | 1.215071  | -0.693602 | 2.860652  |
| 77 | 1 | 0 | 0.312031  | -1.306782 | 2.942053  |
| 78 | 1 | 0 | 2.077090  | -1.280138 | 3.202983  |
| 79 | 1 | 0 | 1.116001  | 0.180228  | 3.508901  |
| 80 | 6 | 0 | -4.880921 | -2.838071 | -0.074529 |
| 81 | 1 | 0 | -5.886555 | -2.577518 | 0.269851  |
| 82 | 1 | 0 | -4.975444 | -3.226127 | -1.094820 |
| 83 | 1 | 0 | -4.532953 | -3.653749 | 0.564150  |
| 84 | 1 | 0 | 4.701128  | 6.303182  | -0.678186 |
| 85 | 1 | 0 | 3.942633  | 5.760263  | 0.853903  |
| 86 | 1 | 0 | 5.720141  | 5.771104  | 0.698289  |

---



## 6

| Center<br>Number | Atomic<br>Number | Atomic<br>Type | Coordinates (Angstroms) |           |           |
|------------------|------------------|----------------|-------------------------|-----------|-----------|
|                  |                  |                | X                       | Y         | Z         |
| 1                | 6                | 0              | -0.821658               | 0.153800  | -1.056135 |
| 2                | 6                | 0              | 0.548436                | 0.821711  | -0.807273 |
| 3                | 1                | 0              | -0.789652               | -0.266949 | -2.064965 |
| 4                | 1                | 0              | -1.597848               | 0.927398  | -1.066044 |
| 5                | 1                | 0              | 0.541750                | 1.412726  | 0.113893  |
| 6                | 1                | 0              | 0.739306                | 1.512210  | -1.636354 |
| 7                | 6                | 0              | 3.802001                | -1.130081 | 0.019027  |
| 8                | 6                | 0              | 2.658109                | -2.149171 | 0.249058  |
| 9                | 6                | 0              | 1.403069                | -1.222257 | 0.430545  |
| 10               | 6                | 0              | 1.636169                | -0.253362 | -0.750375 |
| 11               | 6                | 0              | 3.014909                | -3.129044 | 1.344279  |
| 12               | 1                | 0              | 2.452715                | -2.745913 | -0.644988 |
| 13               | 8                | 0              | 1.499293                | -0.418798 | 1.627129  |
| 14               | 6                | 0              | -1.795398               | -3.328371 | 0.249710  |
| 15               | 6                | 0              | -2.256563               | -2.056458 | -0.535816 |
| 16               | 6                | 0              | -1.192564               | -0.953111 | -0.026709 |
| 17               | 6                | 0              | 0.030063                | -1.843205 | 0.298788  |
| 18               | 6                | 0              | -0.322022               | -3.122936 | 0.463060  |
| 19               | 1                | 0              | -2.310409               | -3.411327 | 1.218980  |
| 20               | 1                | 0              | -2.016844               | -4.253361 | -0.295134 |
| 21               | 6                | 0              | -2.066343               | -2.363304 | -2.039304 |
| 22               | 6                | 0              | -1.665889               | -0.265143 | 1.280877  |
| 23               | 1                | 0              | 0.355027                | -3.926671 | 0.732060  |
| 24               | 1                | 0              | -2.361177               | -1.533046 | -2.686188 |
| 25               | 1                | 0              | -1.021565               | -2.602488 | -2.260711 |
| 26               | 1                | 0              | -2.665306               | -3.232414 | -2.327627 |
| 27               | 1                | 0              | -0.876150               | 0.376789  | 1.676209  |
| 28               | 1                | 0              | -2.548086               | 0.358536  | 1.110973  |
| 29               | 1                | 0              | -1.916624               | -0.995730 | 2.056180  |
| 30               | 6                | 0              | -3.760809               | -1.738104 | -0.227930 |
| 31               | 6                | 0              | -4.298277               | -0.507915 | -0.997401 |
| 32               | 6                | 0              | -5.666735               | 0.005906  | -0.546218 |
| 33               | 6                | 0              | -6.123471               | 1.299468  | -1.250832 |
| 34               | 6                | 0              | -5.676671               | 2.417470  | -0.296389 |
| 35               | 6                | 0              | -5.639936               | 1.708005  | 1.053327  |
| 36               | 8                | 0              | -5.628210               | 0.366134  | 0.877739  |
| 37               | 1                | 0              | -6.421594               | -0.778517 | -0.619569 |
| 38               | 1                | 0              | -7.214594               | 1.309362  | -1.348515 |
| 39               | 1                | 0              | -5.695236               | 1.392185  | -2.251960 |
| 40               | 1                | 0              | -4.634007               | 2.694703  | -0.508377 |
| 41               | 6                | 0              | -6.531180               | 3.685856  | -0.292085 |
| 42               | 1                | 0              | -3.823075               | -1.507634 | 0.840749  |
| 43               | 1                | 0              | -4.397769               | -0.752382 | -2.062922 |
| 44               | 1                | 0              | -3.586924               | 0.321720  | -0.937304 |
| 45               | 8                | 0              | -5.609128               | 2.206296  | 2.159805  |
| 46               | 1                | 0              | -6.178108               | 4.387612  | 0.468343  |
| 47               | 1                | 0              | -6.481767               | 4.180041  | -1.267102 |
| 48               | 1                | 0              | -7.579702               | 3.451124  | -0.080438 |
| 49               | 1                | 0              | 1.483174                | -0.878789 | -1.641817 |
| 50               | 6                | 0              | 3.160103                | 0.108246  | -0.767782 |
| 51               | 6                | 0              | 3.624592                | 0.183248  | -2.235081 |

|    |   |   |           |           |           |
|----|---|---|-----------|-----------|-----------|
| 52 | 6 | 0 | 3.549077  | 1.403516  | 0.003315  |
| 53 | 1 | 0 | 4.666152  | 0.508499  | -2.326631 |
| 54 | 1 | 0 | 3.538346  | -0.790965 | -2.724922 |
| 55 | 1 | 0 | 3.006599  | 0.890844  | -2.798759 |
| 56 | 6 | 0 | 3.280832  | 2.747585  | -0.686887 |
| 57 | 6 | 0 | 3.825830  | 3.922435  | 0.099150  |
| 58 | 8 | 0 | 4.652301  | 3.865575  | 0.992543  |
| 59 | 8 | 0 | 3.293264  | 5.085893  | -0.333267 |
| 60 | 6 | 0 | 3.772779  | 6.290595  | 0.303146  |
| 61 | 6 | 0 | 5.089473  | -1.714370 | -0.544563 |
| 62 | 1 | 0 | 4.056394  | -0.742719 | 1.014817  |
| 63 | 6 | 0 | 5.150094  | -2.877981 | -1.210667 |
| 64 | 6 | 0 | 6.349622  | -0.922205 | -0.273594 |
| 65 | 1 | 0 | 6.098717  | -3.258723 | -1.579824 |
| 66 | 1 | 0 | 4.278091  | -3.491163 | -1.412817 |
| 67 | 1 | 0 | 6.491875  | -0.774507 | 0.804551  |
| 68 | 1 | 0 | 7.232338  | -1.431181 | -0.670204 |
| 69 | 1 | 0 | 6.307786  | 0.077085  | -0.721714 |
| 70 | 1 | 0 | 2.219174  | 2.930947  | -0.864372 |
| 71 | 1 | 0 | 3.763697  | 2.793064  | -1.671405 |
| 72 | 1 | 0 | 4.622882  | 1.359091  | 0.211778  |
| 73 | 1 | 0 | 3.049940  | 1.390186  | 0.976121  |
| 74 | 8 | 0 | 2.646884  | -4.291410 | 1.384052  |
| 75 | 1 | 0 | 3.690544  | -2.743770 | 2.135131  |
| 76 | 6 | 0 | 1.290228  | -1.054573 | 2.884538  |
| 77 | 1 | 0 | 0.448443  | -1.754072 | 2.857847  |
| 78 | 1 | 0 | 2.188291  | -1.586752 | 3.223589  |
| 79 | 1 | 0 | 1.072603  | -0.258967 | 3.601208  |
| 80 | 6 | 0 | -4.681292 | -2.954813 | -0.468294 |
| 81 | 1 | 0 | -5.689282 | -2.760600 | -0.089595 |
| 82 | 1 | 0 | -4.772621 | -3.196954 | -1.533148 |
| 83 | 1 | 0 | -4.319532 | -3.846752 | 0.048906  |
| 84 | 1 | 0 | 4.849449  | 6.396215  | 0.153274  |
| 85 | 1 | 0 | 3.236718  | 7.105879  | -0.180724 |
| 86 | 1 | 0 | 3.553141  | 6.267983  | 1.372613  |

---

| Center<br>Number | Atomic<br>Number | Atomic<br>Type | Coordinates (Angstroms) |           |           |
|------------------|------------------|----------------|-------------------------|-----------|-----------|
|                  |                  |                | X                       | Y         | Z         |
| 1                | 6                | 0              | -0.857085               | 0.070228  | -1.175256 |
| 2                | 6                | 0              | 0.501599                | 0.800828  | -1.083403 |
| 3                | 1                | 0              | -0.862246               | -0.466932 | -2.127364 |
| 4                | 1                | 0              | -1.659745               | 0.813767  | -1.232772 |
| 5                | 1                | 0              | 0.516559                | 1.507947  | -0.249416 |
| 6                | 1                | 0              | 0.642336                | 1.383976  | -2.001455 |
| 7                | 6                | 0              | 3.853824                | -0.881537 | -0.146654 |
| 8                | 6                | 0              | 2.776370                | -1.913762 | 0.280836  |
| 9                | 6                | 0              | 1.479947                | -1.030987 | 0.380964  |
| 10               | 6                | 0              | 1.610616                | -0.242149 | -0.940416 |
| 11               | 6                | 0              | 3.217764                | -2.701611 | 1.493754  |
| 12               | 1                | 0              | 2.575870                | -2.646248 | -0.508049 |
| 13               | 8                | 0              | 1.581626                | -0.065054 | 1.447273  |
| 14               | 6                | 0              | -1.635636               | -3.254115 | 0.603970  |
| 15               | 6                | 0              | -2.169412               | -2.116405 | -0.327778 |
| 16               | 6                | 0              | -1.138663               | -0.916072 | -0.001903 |
| 17               | 6                | 0              | 0.130029                | -1.712669 | 0.392045  |
| 18               | 6                | 0              | -0.165902               | -2.970042 | 0.737874  |
| 19               | 1                | 0              | -2.120109               | -3.225539 | 1.592067  |
| 20               | 1                | 0              | -1.834797               | -4.251094 | 0.194617  |
| 21               | 6                | 0              | -2.007277               | -2.613681 | -1.782793 |
| 22               | 6                | 0              | -1.599247               | -0.087778 | 1.226694  |
| 23               | 1                | 0              | 0.550772                | -3.705853 | 1.087600  |
| 24               | 1                | 0              | -2.356817               | -1.891054 | -2.524593 |
| 25               | 1                | 0              | -0.959870               | -2.839430 | -2.005638 |
| 26               | 1                | 0              | -2.576236               | -3.536165 | -1.931956 |
| 27               | 1                | 0              | -0.830221               | 0.636806  | 1.501640  |
| 28               | 1                | 0              | -2.517077               | 0.467837  | 1.015995  |
| 29               | 1                | 0              | -1.783978               | -0.721737 | 2.099392  |
| 30               | 6                | 0              | -3.677359               | -1.817107 | -0.016681 |
| 31               | 6                | 0              | -4.285325               | -0.714121 | -0.915700 |
| 32               | 6                | 0              | -5.670118               | -0.213306 | -0.500629 |
| 33               | 6                | 0              | -6.191301               | 0.974379  | -1.335338 |
| 34               | 6                | 0              | -5.792528               | 2.209198  | -0.512531 |
| 35               | 6                | 0              | -5.702457               | 1.652608  | 0.904517  |
| 36               | 8                | 0              | -5.631388               | 0.301461  | 0.874863  |
| 37               | 1                | 0              | -6.390024               | -1.032818 | -0.476903 |
| 38               | 1                | 0              | -7.282016               | 0.922889  | -1.422652 |
| 39               | 1                | 0              | -5.772733               | 0.977398  | -2.344807 |
| 40               | 1                | 0              | -4.768955               | 2.516475  | -0.770561 |
| 41               | 6                | 0              | -6.713571               | 3.424996  | -0.627425 |
| 42               | 1                | 0              | -3.721642               | -1.457566 | 1.016415  |
| 43               | 1                | 0              | -4.389362               | -1.088228 | -1.942477 |
| 44               | 1                | 0              | -3.614877               | 0.149381  | -0.970737 |
| 45               | 8                | 0              | -5.678436               | 2.269243  | 1.949823  |
| 46               | 1                | 0              | -6.387669               | 4.222071  | 0.046251  |
| 47               | 1                | 0              | -6.704620               | 3.812908  | -1.650530 |
| 48               | 1                | 0              | -7.744957               | 3.160638  | -0.371049 |
| 49               | 1                | 0              | 1.396607                | -0.997818 | -1.709044 |
| 50               | 6                | 0              | 3.123671                | 0.116363  | -1.148670 |
| 51               | 6                | 0              | 3.474467                | -0.190214 | -2.622185 |

|    |   |   |           |           |           |
|----|---|---|-----------|-----------|-----------|
| 52 | 6 | 0 | 3.493354  | 1.612189  | -0.928975 |
| 53 | 1 | 0 | 4.516690  | 0.047846  | -2.854888 |
| 54 | 1 | 0 | 3.314179  | -1.245931 | -2.859943 |
| 55 | 1 | 0 | 2.839729  | 0.405295  | -3.288973 |
| 56 | 6 | 0 | 3.372828  | 2.224555  | 0.484903  |
| 57 | 6 | 0 | 3.781893  | 3.678781  | 0.448766  |
| 58 | 8 | 0 | 4.931815  | 4.085091  | 0.491383  |
| 59 | 8 | 0 | 2.718770  | 4.502260  | 0.331020  |
| 60 | 6 | 0 | 3.003622  | 5.915514  | 0.241459  |
| 61 | 6 | 0 | 5.177655  | -1.473559 | -0.608072 |
| 62 | 1 | 0 | 4.081085  | -0.305349 | 0.758823  |
| 63 | 6 | 0 | 5.321126  | -2.741406 | -1.023754 |
| 64 | 6 | 0 | 6.371698  | -0.548193 | -0.535111 |
| 65 | 1 | 0 | 6.292916  | -3.120371 | -1.328867 |
| 66 | 1 | 0 | 4.495293  | -3.443102 | -1.079560 |
| 67 | 1 | 0 | 7.290847  | -1.058142 | -0.835708 |
| 68 | 1 | 0 | 6.245750  | 0.327802  | -1.181692 |
| 69 | 1 | 0 | 6.507664  | -0.165500 | 0.484354  |
| 70 | 1 | 0 | 4.049113  | 1.723625  | 1.182026  |
| 71 | 1 | 0 | 2.358564  | 2.129844  | 0.868800  |
| 72 | 1 | 0 | 2.872117  | 2.203201  | -1.613352 |
| 73 | 1 | 0 | 4.526214  | 1.757878  | -1.264823 |
| 74 | 8 | 0 | 2.890197  | -3.852692 | 1.729797  |
| 75 | 1 | 0 | 3.913613  | -2.179758 | 2.181863  |
| 76 | 6 | 0 | 1.434256  | -0.519563 | 2.789215  |
| 77 | 1 | 0 | 1.232012  | 0.367482  | 3.394433  |
| 78 | 1 | 0 | 0.604109  | -1.224701 | 2.897077  |
| 79 | 1 | 0 | 2.353112  | -0.988763 | 3.163186  |
| 80 | 6 | 0 | -4.553606 | -3.088027 | -0.074505 |
| 81 | 1 | 0 | -5.558025 | -2.885302 | 0.309212  |
| 82 | 1 | 0 | -4.663192 | -3.465079 | -1.097546 |
| 83 | 1 | 0 | -4.142859 | -3.894542 | 0.537816  |
| 84 | 1 | 0 | 3.524137  | 6.254641  | 1.139597  |
| 85 | 1 | 0 | 3.617953  | 6.123485  | -0.637314 |
| 86 | 1 | 0 | 2.032728  | 6.401334  | 0.154926  |

---

| Center<br>Number | Atomic<br>Number | Atomic<br>Type | Coordinates (Angstroms) |           |           |
|------------------|------------------|----------------|-------------------------|-----------|-----------|
|                  |                  |                | X                       | Y         | Z         |
| 1                | 6                | 0              | -1.094073               | 0.178073  | -1.129221 |
| 2                | 6                | 0              | 0.299581                | 0.835828  | -1.029732 |
| 3                | 1                | 0              | -1.118471               | -0.377157 | -2.070886 |
| 4                | 1                | 0              | -1.853970               | 0.963523  | -1.210500 |
| 5                | 1                | 0              | 0.348512                | 1.539391  | -0.193569 |
| 6                | 1                | 0              | 0.479484                | 1.413108  | -1.944902 |
| 7                | 6                | 0              | 3.554852                | -1.112722 | -0.170800 |
| 8                | 6                | 0              | 2.390157                | -2.022273 | 0.332547  |
| 9                | 6                | 0              | 1.173245                | -1.037046 | 0.444439  |
| 10               | 6                | 0              | 1.357752                | -0.256821 | -0.876739 |
| 11               | 6                | 0              | 2.807949                | -2.803437 | 1.555129  |
| 12               | 1                | 0              | 2.107190                | -2.760530 | -0.423183 |
| 13               | 8                | 0              | 1.353937                | -0.080910 | 1.511156  |
| 14               | 6                | 0              | -2.072948               | -3.059372 | 0.710058  |
| 15               | 6                | 0              | -2.539746               | -1.908304 | -0.241442 |
| 16               | 6                | 0              | -1.438027               | -0.766207 | 0.060941  |
| 17               | 6                | 0              | -0.218593               | -1.630012 | 0.465793  |
| 18               | 6                | 0              | -0.588132               | -2.861171 | 0.834577  |
| 19               | 1                | 0              | -2.550817               | -2.982318 | 1.698852  |
| 20               | 1                | 0              | -2.334359               | -4.049792 | 0.320038  |
| 21               | 6                | 0              | -2.413030               | -2.438332 | -1.688137 |
| 22               | 6                | 0              | -1.843454               | 0.111598  | 1.274004  |
| 23               | 1                | 0              | 0.083311                | -3.633649 | 1.195361  |
| 24               | 1                | 0              | -2.720604               | -1.707206 | -2.440321 |
| 25               | 1                | 0              | -1.381869               | -2.730482 | -1.909527 |
| 26               | 1                | 0              | -3.037786               | -3.326700 | -1.820674 |
| 27               | 1                | 0              | -1.025618               | 0.782975  | 1.543501  |
| 28               | 1                | 0              | -2.718273               | 0.728359  | 1.049949  |
| 29               | 1                | 0              | -2.077284               | -0.494574 | 2.154649  |
| 30               | 6                | 0              | -4.024466               | -1.510823 | 0.066996  |
| 31               | 6                | 0              | -4.570164               | -0.402146 | -0.864498 |
| 32               | 6                | 0              | -5.879937               | 0.248484  | -0.415012 |
| 33               | 6                | 0              | -6.345327               | 1.419665  | -1.304357 |
| 34               | 6                | 0              | -5.794024               | 2.665995  | -0.594704 |
| 35               | 6                | 0              | -5.672831               | 2.200402  | 0.852444  |
| 36               | 8                | 0              | -5.715612               | 0.848887  | 0.915728  |
| 37               | 1                | 0              | -6.665146               | -0.499560 | -0.293029 |
| 38               | 1                | 0              | -7.439755               | 1.460913  | -1.329951 |
| 39               | 1                | 0              | -5.988198               | 1.317835  | -2.332111 |
| 40               | 1                | 0              | -4.763706               | 2.859963  | -0.925674 |
| 41               | 6                | 0              | -6.609741               | 3.950192  | -0.751601 |
| 42               | 1                | 0              | -4.040997               | -1.118406 | 1.088814  |
| 43               | 1                | 0              | -4.758320               | -0.817305 | -1.863222 |
| 44               | 1                | 0              | -3.826589               | 0.389452  | -0.998161 |
| 45               | 8                | 0              | -5.540381               | 2.880870  | 1.848805  |
| 46               | 1                | 0              | -6.177598               | 4.758001  | -0.154905 |
| 47               | 1                | 0              | -6.624494               | 4.265235  | -1.799395 |
| 48               | 1                | 0              | -7.644166               | 3.799255  | -0.425209 |
| 49               | 1                | 0              | 1.140608                | -1.000682 | -1.656991 |
| 50               | 6                | 0              | 2.878576                | 0.061484  | -1.025072 |
| 51               | 6                | 0              | 3.259869                | 0.067401  | -2.519679 |

|    |   |   |           |           |           |
|----|---|---|-----------|-----------|-----------|
| 52 | 6 | 0 | 3.223211  | 1.449793  | -0.415662 |
| 53 | 1 | 0 | 4.343253  | 0.072572  | -2.668726 |
| 54 | 1 | 0 | 2.858139  | -0.800287 | -3.049754 |
| 55 | 1 | 0 | 2.851827  | 0.961158  | -3.006026 |
| 56 | 6 | 0 | 4.694364  | 1.872853  | -0.516312 |
| 57 | 6 | 0 | 4.948923  | 3.249385  | 0.060395  |
| 58 | 8 | 0 | 4.114337  | 4.122845  | 0.219041  |
| 59 | 8 | 0 | 6.254061  | 3.419511  | 0.364168  |
| 60 | 6 | 0 | 6.634547  | 4.718058  | 0.869278  |
| 61 | 6 | 0 | 4.692014  | -1.911383 | -0.800646 |
| 62 | 1 | 0 | 3.974709  | -0.631645 | 0.719634  |
| 63 | 6 | 0 | 5.963281  | -1.697268 | -0.426784 |
| 64 | 6 | 0 | 4.367364  | -3.004483 | -1.797421 |
| 65 | 1 | 0 | 6.785080  | -2.262116 | -0.859273 |
| 66 | 1 | 0 | 6.225658  | -0.959001 | 0.326337  |
| 67 | 1 | 0 | 5.274672  | -3.357514 | -2.294912 |
| 68 | 1 | 0 | 3.909822  | -3.867171 | -1.297289 |
| 69 | 1 | 0 | 3.662332  | -2.676624 | -2.566227 |
| 70 | 1 | 0 | 5.027597  | 1.916996  | -1.561242 |
| 71 | 1 | 0 | 5.366031  | 1.168681  | -0.018985 |
| 72 | 1 | 0 | 2.917525  | 1.461910  | 0.633105  |
| 73 | 1 | 0 | 2.618864  | 2.209066  | -0.922865 |
| 74 | 8 | 0 | 2.497170  | -3.962868 | 1.775084  |
| 75 | 1 | 0 | 3.478669  | -2.274200 | 2.261672  |
| 76 | 6 | 0 | 1.137467  | -0.506444 | 2.853579  |
| 77 | 1 | 0 | 1.016150  | 0.402944  | 3.447103  |
| 78 | 1 | 0 | 0.238039  | -1.121853 | 2.952179  |
| 79 | 1 | 0 | 1.996079  | -1.063797 | 3.248717  |
| 80 | 6 | 0 | -4.977166 | -2.726475 | 0.052084  |
| 81 | 1 | 0 | -5.972576 | -2.444809 | 0.409114  |
| 82 | 1 | 0 | -5.096676 | -3.142806 | -0.954430 |
| 83 | 1 | 0 | -4.625321 | -3.527605 | 0.706812  |
| 84 | 1 | 0 | 7.707748  | 4.656734  | 1.044446  |
| 85 | 1 | 0 | 6.409082  | 5.492796  | 0.133190  |
| 86 | 1 | 0 | 6.105162  | 4.933291  | 1.799944  |

---

| Center<br>Number | Atomic<br>Number | Atomic<br>Type | Coordinates (Angstroms) |           |           |
|------------------|------------------|----------------|-------------------------|-----------|-----------|
|                  |                  |                | X                       | Y         | Z         |
| 1                | 6                | 0              | -1.071677               | 0.123894  | -1.152169 |
| 2                | 6                | 0              | 0.307833                | 0.816322  | -1.107282 |
| 3                | 1                | 0              | -1.099273               | -0.471334 | -2.069107 |
| 4                | 1                | 0              | -1.851183               | 0.887540  | -1.252551 |
| 5                | 1                | 0              | 0.356155                | 1.553690  | -0.300753 |
| 6                | 1                | 0              | 0.456691                | 1.359305  | -2.048527 |
| 7                | 6                | 0              | 3.622345                | -1.028011 | -0.237654 |
| 8                | 6                | 0              | 2.487228                | -1.936398 | 0.331074  |
| 9                | 6                | 0              | 1.251788                | -0.972854 | 0.426371  |
| 10               | 6                | 0              | 1.392516                | -0.246589 | -0.930224 |
| 11               | 6                | 0              | 2.946978                | -2.655494 | 1.576714  |
| 12               | 1                | 0              | 2.202805                | -2.712813 | -0.384913 |
| 13               | 8                | 0              | 1.431262                | 0.032765  | 1.447184  |
| 14               | 6                | 0              | -1.942790               | -3.050950 | 0.843467  |
| 15               | 6                | 0              | -2.452151               | -1.954284 | -0.149118 |
| 16               | 6                | 0              | -1.371941               | -0.776166 | 0.083366  |
| 17               | 6                | 0              | -0.125676               | -1.594127 | 0.501519  |
| 18               | 6                | 0              | -0.460799               | -2.815760 | 0.930375  |
| 19               | 1                | 0              | -2.403841               | -2.940438 | 1.837011  |
| 20               | 1                | 0              | -2.188875               | -4.063077 | 0.502413  |
| 21               | 6                | 0              | -2.335512               | -2.545194 | -1.573025 |
| 22               | 6                | 0              | -1.775169               | 0.142732  | 1.266386  |
| 23               | 1                | 0              | 0.233807                | -3.557710 | 1.310885  |
| 24               | 1                | 0              | -2.670259               | -1.854839 | -2.351556 |
| 25               | 1                | 0              | -1.301210               | -2.823437 | -1.797468 |
| 26               | 1                | 0              | -2.941533               | -3.452316 | -1.657079 |
| 27               | 1                | 0              | -0.970744               | 0.846914  | 1.489277  |
| 28               | 1                | 0              | -2.671254               | 0.725582  | 1.036225  |
| 29               | 1                | 0              | -1.973325               | -0.431416 | 2.176678  |
| 30               | 6                | 0              | -3.940833               | -1.576986 | 0.166641  |
| 31               | 6                | 0              | -4.527776               | -0.526879 | -0.806697 |
| 32               | 6                | 0              | -5.855342               | 0.099698  | -0.376196 |
| 33               | 6                | 0              | -6.368754               | 1.209658  | -1.316053 |
| 34               | 6                | 0              | -5.856628               | 2.507563  | -0.672300 |
| 35               | 6                | 0              | -5.704263               | 2.116196  | 0.793975  |
| 36               | 8                | 0              | -5.700449               | 0.768960  | 0.922370  |
| 37               | 1                | 0              | -6.612968               | -0.668029 | -0.210454 |
| 38               | 1                | 0              | -7.464073               | 1.211360  | -1.333116 |
| 39               | 1                | 0              | -6.016344               | 1.070725  | -2.341126 |
| 40               | 1                | 0              | -4.837414               | 2.722763  | -1.023647 |
| 41               | 6                | 0              | -6.720729               | 3.752207  | -0.880894 |
| 42               | 1                | 0              | -3.950140               | -1.136669 | 1.169055  |
| 43               | 1                | 0              | -4.708239               | -0.989805 | -1.785552 |
| 44               | 1                | 0              | -3.810545               | 0.281679  | -0.978395 |
| 45               | 8                | 0              | -5.583739               | 2.847931  | 1.754994  |
| 46               | 1                | 0              | -6.313643               | 4.603021  | -0.327922 |
| 47               | 1                | 0              | -6.756480               | 4.015863  | -1.942262 |
| 48               | 1                | 0              | -7.745937               | 3.579064  | -0.536888 |
| 49               | 1                | 0              | 1.176291                | -1.027086 | -1.673977 |
| 50               | 6                | 0              | 2.903129                | 0.094513  | -1.124889 |
| 51               | 6                | 0              | 3.253390                | 0.050228  | -2.625731 |

|    |   |   |           |           |           |
|----|---|---|-----------|-----------|-----------|
| 52 | 6 | 0 | 3.231905  | 1.512535  | -0.577412 |
| 53 | 1 | 0 | 4.333038  | 0.073342  | -2.797422 |
| 54 | 1 | 0 | 2.860271  | -0.846369 | -3.112098 |
| 55 | 1 | 0 | 2.816262  | 0.915194  | -3.137988 |
| 56 | 6 | 0 | 4.697305  | 1.972715  | -0.757775 |
| 57 | 6 | 0 | 4.882846  | 3.356948  | -0.181557 |
| 58 | 8 | 0 | 4.542349  | 4.392204  | -0.729866 |
| 59 | 8 | 0 | 5.448832  | 3.327745  | 1.043132  |
| 60 | 6 | 0 | 5.625378  | 4.600934  | 1.702622  |
| 61 | 6 | 0 | 4.760636  | -1.831543 | -0.859362 |
| 62 | 1 | 0 | 4.053480  | -0.501436 | 0.620852  |
| 63 | 6 | 0 | 6.034603  | -1.578672 | -0.520405 |
| 64 | 6 | 0 | 4.436733  | -2.969715 | -1.804328 |
| 65 | 1 | 0 | 6.858633  | -2.145401 | -0.946083 |
| 66 | 1 | 0 | 6.296536  | -0.805085 | 0.196589  |
| 67 | 1 | 0 | 5.340361  | -3.326281 | -2.305931 |
| 68 | 1 | 0 | 4.005548  | -3.819657 | -1.260799 |
| 69 | 1 | 0 | 3.710363  | -2.685905 | -2.570736 |
| 70 | 1 | 0 | 4.954369  | 2.030161  | -1.818630 |
| 71 | 1 | 0 | 5.389168  | 1.283780  | -0.270153 |
| 72 | 1 | 0 | 2.969573  | 1.550236  | 0.482900  |
| 73 | 1 | 0 | 2.591561  | 2.238245  | -1.091373 |
| 74 | 8 | 0 | 2.663901  | -3.809906 | 1.852808  |
| 75 | 1 | 0 | 3.622029  | -2.083907 | 2.244941  |
| 76 | 6 | 0 | 1.257788  | -0.340978 | 2.811176  |
| 77 | 1 | 0 | 2.145575  | -0.846663 | 3.210991  |
| 78 | 1 | 0 | 1.112413  | 0.587978  | 3.367904  |
| 79 | 1 | 0 | 0.385232  | -0.985465 | 2.955044  |
| 80 | 6 | 0 | -4.863922 | -2.813878 | 0.226045  |
| 81 | 1 | 0 | -5.858433 | -2.539416 | 0.590949  |
| 82 | 1 | 0 | -4.993583 | -3.277914 | -0.758133 |
| 83 | 1 | 0 | -4.480620 | -3.576318 | 0.908638  |
| 84 | 1 | 0 | 6.095725  | 4.369275  | 2.657168  |
| 85 | 1 | 0 | 6.267660  | 5.250984  | 1.104818  |
| 86 | 1 | 0 | 4.658458  | 5.084531  | 1.857350  |

---



| Center<br>Number | Atomic<br>Number | Atomic<br>Type | Coordinates (Angstroms) |           |           |
|------------------|------------------|----------------|-------------------------|-----------|-----------|
|                  |                  |                | X                       | Y         | Z         |
| 1                | 6                | 0              | -1.052227               | 0.069587  | -1.179976 |
| 2                | 6                | 0              | 0.325528                | 0.764195  | -1.130232 |
| 3                | 1                | 0              | -1.073648               | -0.531315 | -2.093365 |
| 4                | 1                | 0              | -1.831601               | 0.832147  | -1.289791 |
| 5                | 1                | 0              | 0.366250                | 1.504297  | -0.325975 |
| 6                | 1                | 0              | 0.477348                | 1.304972  | -2.072342 |
| 7                | 6                | 0              | 3.638430                | -1.073176 | -0.238333 |
| 8                | 6                | 0              | 2.501382                | -1.982617 | 0.313365  |
| 9                | 6                | 0              | 1.263103                | -1.026000 | 0.408727  |
| 10               | 6                | 0              | 1.412969                | -0.295035 | -0.944013 |
| 11               | 6                | 0              | 2.954749                | -2.727648 | 1.548442  |
| 12               | 1                | 0              | 2.213817                | -2.747239 | -0.412456 |
| 13               | 8                | 0              | 1.434145                | -0.024574 | 1.435437  |
| 14               | 6                | 0              | -1.939811               | -3.095100 | 0.819102  |
| 15               | 6                | 0              | -2.446302               | -1.994325 | -0.169992 |
| 16               | 6                | 0              | -1.357850               | -0.823276 | 0.058883  |
| 17               | 6                | 0              | -0.115516               | -1.647041 | 0.476697  |
| 18               | 6                | 0              | -0.456377               | -2.867761 | 0.903980  |
| 19               | 1                | 0              | -2.397588               | -2.983952 | 1.814120  |
| 20               | 1                | 0              | -2.192312               | -4.105378 | 0.477101  |
| 21               | 6                | 0              | -2.340521               | -2.584432 | -1.595062 |
| 22               | 6                | 0              | -1.753360               | 0.100995  | 1.240334  |
| 23               | 1                | 0              | 0.235455                | -3.612228 | 1.284064  |
| 24               | 1                | 0              | -2.673372               | -1.890453 | -2.371255 |
| 25               | 1                | 0              | -1.309382               | -2.870424 | -1.824331 |
| 26               | 1                | 0              | -2.953769               | -3.486851 | -1.677685 |
| 27               | 1                | 0              | -0.942455               | 0.797609  | 1.462930  |
| 28               | 1                | 0              | -2.644798               | 0.690956  | 1.010136  |
| 29               | 1                | 0              | -1.955930               | -0.470909 | 2.151147  |
| 30               | 6                | 0              | -3.930767               | -1.606370 | 0.152584  |
| 31               | 6                | 0              | -4.515107               | -0.553430 | -0.819420 |
| 32               | 6                | 0              | -5.825045               | 0.098690  | -0.373195 |
| 33               | 6                | 0              | -6.335135               | 1.208711  | -1.314828 |
| 34               | 6                | 0              | -5.789996               | 2.503448  | -0.692079 |
| 35               | 6                | 0              | -5.619744               | 2.123079  | 0.775081  |
| 36               | 8                | 0              | -5.637903               | 0.777295  | 0.916466  |
| 37               | 1                | 0              | -6.592422               | -0.654712 | -0.187553 |
| 38               | 1                | 0              | -7.430391               | 1.229316  | -1.313730 |
| 39               | 1                | 0              | -6.002495               | 1.054304  | -2.344272 |
| 40               | 1                | 0              | -4.773283               | 2.697992  | -1.062473 |
| 41               | 6                | 0              | -6.636193               | 3.760827  | -0.897787 |
| 42               | 1                | 0              | -3.931843               | -1.164569 | 1.154347  |
| 43               | 1                | 0              | -4.717908               | -1.020184 | -1.792108 |
| 44               | 1                | 0              | -3.787472               | 0.241798  | -1.008036 |
| 45               | 8                | 0              | -5.469828               | 2.861616  | 1.726755  |
| 46               | 1                | 0              | -6.205163               | 4.609611  | -0.360021 |
| 47               | 1                | 0              | -6.685837               | 4.015184  | -1.960863 |
| 48               | 1                | 0              | -7.658081               | 3.608577  | -0.534518 |
| 49               | 1                | 0              | 1.211045                | -1.073327 | -1.694068 |
| 50               | 6                | 0              | 2.925405                | 0.061439  | -1.118166 |
| 51               | 6                | 0              | 3.281039                | -0.007225 | -2.614926 |

|    |   |   |           |           |           |
|----|---|---|-----------|-----------|-----------|
| 52 | 6 | 0 | 3.202739  | 1.490861  | -0.572642 |
| 53 | 1 | 0 | 4.334826  | 0.209799  | -2.809679 |
| 54 | 1 | 0 | 3.071982  | -0.997961 | -3.027870 |
| 55 | 1 | 0 | 2.686365  | 0.725264  | -3.173013 |
| 56 | 6 | 0 | 4.668311  | 1.980283  | -0.608537 |
| 57 | 6 | 0 | 4.745743  | 3.414059  | -0.136202 |
| 58 | 8 | 0 | 4.548437  | 4.391529  | -0.838751 |
| 59 | 8 | 0 | 5.029626  | 3.500819  | 1.179753  |
| 60 | 6 | 0 | 5.072427  | 4.830016  | 1.744426  |
| 61 | 6 | 0 | 4.781262  | -1.854953 | -0.886208 |
| 62 | 1 | 0 | 4.069633  | -0.560678 | 0.631881  |
| 63 | 6 | 0 | 4.625094  | -3.052540 | -1.471509 |
| 64 | 6 | 0 | 6.156221  | -1.228333 | -0.816868 |
| 65 | 1 | 0 | 5.473742  | -3.569474 | -1.911326 |
| 66 | 1 | 0 | 3.669903  | -3.561829 | -1.543211 |
| 67 | 1 | 0 | 6.918569  | -1.904433 | -1.212907 |
| 68 | 1 | 0 | 6.209069  | -0.295492 | -1.388681 |
| 69 | 1 | 0 | 6.422837  | -0.979771 | 0.218386  |
| 70 | 1 | 0 | 5.064492  | 1.961348  | -1.627019 |
| 71 | 1 | 0 | 5.301774  | 1.361996  | 0.030559  |
| 72 | 1 | 0 | 2.840869  | 1.546997  | 0.456606  |
| 73 | 1 | 0 | 2.605204  | 2.195595  | -1.162174 |
| 74 | 8 | 0 | 2.596228  | -3.853677 | 1.850294  |
| 75 | 1 | 0 | 3.695298  | -2.201452 | 2.185460  |
| 76 | 6 | 0 | 1.289401  | -0.419571 | 2.795956  |
| 77 | 1 | 0 | 1.156725  | 0.500370  | 3.370442  |
| 78 | 1 | 0 | 0.419649  | -1.066466 | 2.947764  |
| 79 | 1 | 0 | 2.185744  | -0.931739 | 3.168432  |
| 80 | 6 | 0 | -4.862842 | -2.836089 | 0.218151  |
| 81 | 1 | 0 | -5.855733 | -2.552274 | 0.580550  |
| 82 | 1 | 0 | -4.995283 | -3.304570 | -0.763515 |
| 83 | 1 | 0 | -4.485569 | -3.597520 | 0.905285  |
| 84 | 1 | 0 | 4.104971  | 5.322787  | 1.626894  |
| 85 | 1 | 0 | 5.305745  | 4.688657  | 2.798729  |
| 86 | 1 | 0 | 5.847317  | 5.423974  | 1.255251  |

---

| Center<br>Number | Atomic<br>Number | Atomic<br>Type | Coordinates (Angstroms) |           |           |
|------------------|------------------|----------------|-------------------------|-----------|-----------|
|                  |                  |                | X                       | Y         | Z         |
| 1                | 6                | 0              | -1.027486               | 0.161272  | -1.106422 |
| 2                | 6                | 0              | 0.352299                | 0.842672  | -0.978677 |
| 3                | 1                | 0              | -1.035573               | -0.366707 | -2.063826 |
| 4                | 1                | 0              | -1.802343               | 0.933554  | -1.169206 |
| 5                | 1                | 0              | 0.381549                | 1.519496  | -0.119777 |
| 6                | 1                | 0              | 0.525537                | 1.451844  | -1.874290 |
| 7                | 6                | 0              | 3.640992                | -1.073925 | -0.166865 |
| 8                | 6                | 0              | 2.489959                | -2.015611 | 0.308357  |
| 9                | 6                | 0              | 1.254661                | -1.056623 | 0.443422  |
| 10               | 6                | 0              | 1.431048                | -0.233476 | -0.852543 |
| 11               | 6                | 0              | 2.918688                | -2.824899 | 1.509113  |
| 12               | 1                | 0              | 2.221686                | -2.736668 | -0.468957 |
| 13               | 8                | 0              | 1.411724                | -0.128835 | 1.538140  |
| 14               | 6                | 0              | -1.953496               | -3.147578 | 0.628893  |
| 15               | 6                | 0              | -2.438629               | -1.976075 | -0.287699 |
| 16               | 6                | 0              | -1.359278               | -0.823468 | 0.053782  |
| 17               | 6                | 0              | -0.125999               | -1.675950 | 0.439086  |
| 18               | 6                | 0              | -0.473493               | -2.924804 | 0.767375  |
| 19               | 1                | 0              | -2.436911               | -3.112151 | 1.617266  |
| 20               | 1                | 0              | -2.193826               | -4.129871 | 0.206076  |
| 21               | 6                | 0              | -2.297616               | -2.458213 | -1.749837 |
| 22               | 6                | 0              | -1.788104               | 0.011405  | 1.288865  |
| 23               | 1                | 0              | 0.211426                | -3.694790 | 1.107703  |
| 24               | 1                | 0              | -2.613097               | -1.708337 | -2.479933 |
| 25               | 1                | 0              | -1.261224               | -2.727846 | -1.975439 |
| 26               | 1                | 0              | -2.907923               | -3.351369 | -1.913286 |
| 27               | 1                | 0              | -0.983843               | 0.688362  | 1.583756  |
| 28               | 1                | 0              | -2.672160               | 0.619002  | 1.076230  |
| 29               | 1                | 0              | -2.017154               | -0.623859 | 2.150065  |
| 30               | 6                | 0              | -3.931928               | -1.615675 | 0.026247  |
| 31               | 6                | 0              | -4.496577               | -0.495067 | -0.880014 |
| 32               | 6                | 0              | -5.806312               | 0.137671  | -0.405795 |
| 33               | 6                | 0              | -6.303256               | 1.303326  | -1.285217 |
| 34               | 6                | 0              | -5.752889               | 2.555910  | -0.586038 |
| 35               | 6                | 0              | -5.598470               | 2.091555  | 0.858433  |
| 36               | 8                | 0              | -5.624977               | 0.739683  | 0.922161  |
| 37               | 1                | 0              | -6.579229               | -0.620616 | -0.269289 |
| 38               | 1                | 0              | -7.398371               | 1.331545  | -1.289094 |
| 39               | 1                | 0              | -5.965351               | 1.205972  | -2.319865 |
| 40               | 1                | 0              | -4.731380               | 2.761635  | -0.936730 |
| 41               | 6                | 0              | -6.586044               | 3.830701  | -0.727359 |
| 42               | 1                | 0              | -3.959759               | -1.250093 | 1.057708  |
| 43               | 1                | 0              | -4.691793               | -0.895694 | -1.883298 |
| 44               | 1                | 0              | -3.761048               | 0.304966  | -1.008436 |
| 45               | 8                | 0              | -5.453679               | 2.773553  | 1.852057  |
| 46               | 1                | 0              | -6.152169               | 4.643607  | -0.138864 |
| 47               | 1                | 0              | -6.624132               | 4.145378  | -1.774682 |
| 48               | 1                | 0              | -7.612358               | 3.667927  | -0.381701 |
| 49               | 1                | 0              | 1.233880                | -0.956598 | -1.657216 |
| 50               | 6                | 0              | 2.946718                | 0.117563  | -0.980829 |
| 51               | 6                | 0              | 3.336897                | 0.190447  | -2.470578 |

|    |   |   |           |           |           |
|----|---|---|-----------|-----------|-----------|
| 52 | 6 | 0 | 3.260913  | 1.485569  | -0.311622 |
| 53 | 1 | 0 | 4.420804  | 0.225070  | -2.611251 |
| 54 | 1 | 0 | 2.956932  | -0.664967 | -3.035253 |
| 55 | 1 | 0 | 2.913155  | 1.093439  | -2.925423 |
| 56 | 6 | 0 | 4.730690  | 1.957055  | -0.413036 |
| 57 | 6 | 0 | 4.924694  | 3.236749  | 0.366156  |
| 58 | 8 | 0 | 5.215945  | 3.300219  | 1.548980  |
| 59 | 8 | 0 | 4.703474  | 4.329999  | -0.394161 |
| 60 | 6 | 0 | 4.809471  | 5.609129  | 0.268351  |
| 61 | 6 | 0 | 4.786545  | -1.836700 | -0.825946 |
| 62 | 1 | 0 | 4.058505  | -0.616344 | 0.736866  |
| 63 | 6 | 0 | 6.055882  | -1.616985 | -0.448920 |
| 64 | 6 | 0 | 4.473520  | -2.903524 | -1.854597 |
| 65 | 1 | 0 | 6.883643  | -2.157469 | -0.900768 |
| 66 | 1 | 0 | 6.310454  | -0.899625 | 0.326719  |
| 67 | 1 | 0 | 5.384704  | -3.231540 | -2.361998 |
| 68 | 1 | 0 | 4.025969  | -3.785673 | -1.379998 |
| 69 | 1 | 0 | 3.764659  | -2.562259 | -2.614164 |
| 70 | 1 | 0 | 5.014411  | 2.127561  | -1.454170 |
| 71 | 1 | 0 | 5.406618  | 1.214610  | 0.015822  |
| 72 | 1 | 0 | 2.973785  | 1.435909  | 0.741141  |
| 73 | 1 | 0 | 2.630654  | 2.250134  | -0.780645 |
| 74 | 8 | 0 | 2.623380  | -3.994212 | 1.695396  |
| 75 | 1 | 0 | 3.582346  | -2.306923 | 2.230354  |
| 76 | 6 | 0 | 1.200339  | -0.598450 | 2.866817  |
| 77 | 1 | 0 | 1.076249  | 0.291180  | 3.488839  |
| 78 | 1 | 0 | 0.303998  | -1.221066 | 2.947064  |
| 79 | 1 | 0 | 2.062459  | -1.163363 | 3.242549  |
| 80 | 6 | 0 | -4.860474 | -2.848835 | -0.024779 |
| 81 | 1 | 0 | -5.867022 | -2.592290 | 0.319902  |
| 82 | 1 | 0 | -4.955259 | -3.249542 | -1.040133 |
| 83 | 1 | 0 | -4.504271 | -3.654251 | 0.622325  |
| 84 | 1 | 0 | 4.596469  | 6.351259  | -0.499772 |
| 85 | 1 | 0 | 4.082846  | 5.676491  | 1.080886  |
| 86 | 1 | 0 | 5.816923  | 5.746725  | 0.666856  |

---

| Center<br>Number | Atomic<br>Number | Atomic<br>Type | Coordinates (Angstroms) |           |           |
|------------------|------------------|----------------|-------------------------|-----------|-----------|
|                  |                  |                | X                       | Y         | Z         |
| 1                | 6                | 0              | -0.880920               | 0.167397  | -1.101454 |
| 2                | 6                | 0              | 0.501052                | 0.825054  | -0.893915 |
| 3                | 1                | 0              | -0.863979               | -0.297486 | -2.090990 |
| 4                | 1                | 0              | -1.645131               | 0.951937  | -1.139285 |
| 5                | 1                | 0              | 0.512457                | 1.459000  | -0.002052 |
| 6                | 1                | 0              | 0.693796                | 1.473049  | -1.756082 |
| 7                | 6                | 0              | 3.731114                | -1.135014 | 0.001696  |
| 8                | 6                | 0              | 2.575219                | -2.128956 | 0.276465  |
| 9                | 6                | 0              | 1.334729                | -1.176779 | 0.425307  |
| 10               | 6                | 0              | 1.573159                | -0.262700 | -0.798304 |
| 11               | 6                | 0              | 2.923770                | -3.068060 | 1.409356  |
| 12               | 1                | 0              | 2.358162                | -2.758788 | -0.591811 |
| 13               | 8                | 0              | 1.454686                | -0.323094 | 1.584673  |
| 14               | 6                | 0              | -1.893927               | -3.242852 | 0.353575  |
| 15               | 6                | 0              | -2.344188               | -1.996220 | -0.477805 |
| 16               | 6                | 0              | -1.260030               | -0.888112 | -0.022902 |
| 17               | 6                | 0              | -0.048159               | -1.781844 | 0.330743  |
| 18               | 6                | 0              | -0.416691               | -3.048623 | 0.549902  |
| 19               | 1                | 0              | -2.404416               | -3.283235 | 1.327988  |
| 20               | 1                | 0              | -2.129967               | -4.185105 | -0.154440 |
| 21               | 6                | 0              | -2.173601               | -2.366239 | -1.969451 |
| 22               | 6                | 0              | -1.712892               | -0.138728 | 1.257519  |
| 23               | 1                | 0              | 0.251031                | -3.850164 | 0.847299  |
| 24               | 1                | 0              | -2.460795               | -1.557689 | -2.646626 |
| 25               | 1                | 0              | -1.135357               | -2.632526 | -2.190750 |
| 26               | 1                | 0              | -2.790477               | -3.235489 | -2.216097 |
| 27               | 1                | 0              | -0.909543               | 0.504632  | 1.621414  |
| 28               | 1                | 0              | -2.584146               | 0.494095  | 1.066556  |
| 29               | 1                | 0              | -1.971840               | -0.832402 | 2.063375  |
| 30               | 6                | 0              | -3.841055               | -1.644760 | -0.169533 |
| 31               | 6                | 0              | -4.366419               | -0.433352 | -0.976220 |
| 32               | 6                | 0              | -5.727972               | 0.110354  | -0.539030 |
| 33               | 6                | 0              | -6.163815               | 1.394951  | -1.272933 |
| 34               | 6                | 0              | -5.707206               | 2.526912  | -0.339671 |
| 35               | 6                | 0              | -5.684847               | 1.845497  | 1.024548  |
| 36               | 8                | 0              | -5.687527               | 0.500060  | 0.876938  |
| 37               | 1                | 0              | -6.494021               | -0.664471 | -0.597694 |
| 38               | 1                | 0              | -7.254130               | 1.417210  | -1.377304 |
| 39               | 1                | 0              | -5.728625               | 1.460640  | -2.273191 |
| 40               | 1                | 0              | -4.660311               | 2.786846  | -0.552216 |
| 41               | 6                | 0              | -6.545666               | 3.805684  | -0.364979 |
| 42               | 1                | 0              | -3.891187               | -1.376835 | 0.890932  |
| 43               | 1                | 0              | -4.471197               | -0.709253 | -2.033623 |
| 44               | 1                | 0              | -3.645495               | 0.389423  | -0.943457 |
| 45               | 8                | 0              | -5.653713               | 2.366093  | 2.120614  |
| 46               | 1                | 0              | -6.186935               | 4.517914  | 0.382958  |
| 47               | 1                | 0              | -6.485659               | 4.279665  | -1.349370 |
| 48               | 1                | 0              | -7.598009               | 3.588537  | -0.153475 |
| 49               | 1                | 0              | 1.405900                | -0.922776 | -1.661651 |
| 50               | 6                | 0              | 3.102270                | 0.074506  | -0.838386 |
| 51               | 6                | 0              | 3.564593                | 0.078038  | -2.307599 |

|    |   |   |           |           |           |
|----|---|---|-----------|-----------|-----------|
| 52 | 6 | 0 | 3.508232  | 1.400068  | -0.127654 |
| 53 | 1 | 0 | 4.615089  | 0.367831  | -2.413591 |
| 54 | 1 | 0 | 3.447781  | -0.911866 | -2.757719 |
| 55 | 1 | 0 | 2.966296  | 0.781480  | -2.897021 |
| 56 | 6 | 0 | 3.286446  | 2.716870  | -0.908925 |
| 57 | 6 | 0 | 3.719070  | 3.913922  | -0.092584 |
| 58 | 8 | 0 | 2.967332  | 4.719633  | 0.430021  |
| 59 | 8 | 0 | 5.062763  | 3.991261  | 0.012132  |
| 60 | 6 | 0 | 5.588371  | 5.081974  | 0.799258  |
| 61 | 6 | 0 | 5.011200  | -1.756911 | -0.537648 |
| 62 | 1 | 0 | 3.990146  | -0.708876 | 0.980422  |
| 63 | 6 | 0 | 5.056568  | -2.944393 | -1.161095 |
| 64 | 6 | 0 | 6.281298  | -0.971296 | -0.295500 |
| 65 | 1 | 0 | 6.000088  | -3.350821 | -1.515587 |
| 66 | 1 | 0 | 4.176355  | -3.552407 | -1.342371 |
| 67 | 1 | 0 | 6.426872  | -0.788342 | 0.776910  |
| 68 | 1 | 0 | 7.157369  | -1.504309 | -0.674816 |
| 69 | 1 | 0 | 6.250884  | 0.012007  | -0.778756 |
| 70 | 1 | 0 | 2.237062  | 2.868581  | -1.159379 |
| 71 | 1 | 0 | 3.867705  | 2.708847  | -1.836087 |
| 72 | 1 | 0 | 4.576977  | 1.341322  | 0.103809  |
| 73 | 1 | 0 | 2.980952  | 1.452196  | 0.829405  |
| 74 | 8 | 0 | 2.542669  | -4.223486 | 1.496460  |
| 75 | 1 | 0 | 3.606136  | -2.659304 | 2.182586  |
| 76 | 6 | 0 | 1.236036  | -0.895868 | 2.870534  |
| 77 | 1 | 0 | 0.370915  | -1.566484 | 2.881801  |
| 78 | 1 | 0 | 2.118189  | -1.443631 | 3.226363  |
| 79 | 1 | 0 | 1.051990  | -0.062133 | 3.552388  |
| 80 | 6 | 0 | -4.781141 | -2.855247 | -0.360523 |
| 81 | 1 | 0 | -5.782109 | -2.634408 | 0.022225  |
| 82 | 1 | 0 | -4.887005 | -3.130519 | -1.415967 |
| 83 | 1 | 0 | -4.425914 | -3.735027 | 0.181525  |
| 84 | 1 | 0 | 5.218387  | 5.022696  | 1.825019  |
| 85 | 1 | 0 | 6.670534  | 4.961815  | 0.773879  |
| 86 | 1 | 0 | 5.297922  | 6.039245  | 0.361115  |

---

| Center<br>Number | Atomic<br>Number | Atomic<br>Type | Coordinates (Angstroms) |           |           |
|------------------|------------------|----------------|-------------------------|-----------|-----------|
|                  |                  |                | X                       | Y         | Z         |
| 1                | 6                | 0              | -1.022266               | 0.154093  | -1.108601 |
| 2                | 6                | 0              | 0.360783                | 0.825179  | -0.967449 |
| 3                | 1                | 0              | -1.030654               | -0.361873 | -2.072501 |
| 4                | 1                | 0              | -1.791843               | 0.932241  | -1.164143 |
| 5                | 1                | 0              | 0.390019                | 1.490573  | -0.099802 |
| 6                | 1                | 0              | 0.539943                | 1.445324  | -1.854405 |
| 7                | 6                | 0              | 3.635617                | -1.126056 | -0.178345 |
| 8                | 6                | 0              | 2.477342                | -2.060656 | 0.280856  |
| 9                | 6                | 0              | 1.247419                | -1.099704 | 0.431212  |
| 10               | 6                | 0              | 1.433284                | -0.258763 | -0.851197 |
| 11               | 6                | 0              | 2.899829                | -2.905413 | 1.461290  |
| 12               | 1                | 0              | 2.194683                | -2.761881 | -0.507976 |
| 13               | 8                | 0              | 1.406058                | -0.190981 | 1.541654  |
| 14               | 6                | 0              | -1.977580               | -3.169783 | 0.578921  |
| 15               | 6                | 0              | -2.451628               | -1.981661 | -0.321698 |
| 16               | 6                | 0              | -1.363735               | -0.842795 | 0.037994  |
| 17               | 6                | 0              | -0.137902               | -1.710075 | 0.413981  |
| 18               | 6                | 0              | -0.496166               | -2.960641 | 0.723887  |
| 19               | 1                | 0              | -2.462987               | -3.145198 | 1.566662  |
| 20               | 1                | 0              | -2.224571               | -4.144019 | 0.141381  |
| 21               | 6                | 0              | -2.311465               | -2.444691 | -1.790187 |
| 22               | 6                | 0              | -1.787952               | -0.021895 | 1.283947  |
| 23               | 1                | 0              | 0.182518                | -3.739739 | 1.055254  |
| 24               | 1                | 0              | -2.618323               | -1.681971 | -2.510588 |
| 25               | 1                | 0              | -1.276939               | -2.720419 | -2.017034 |
| 26               | 1                | 0              | -2.929277               | -3.330060 | -1.967271 |
| 27               | 1                | 0              | -0.976564               | 0.640192  | 1.592683  |
| 28               | 1                | 0              | -2.664134               | 0.599335  | 1.077446  |
| 29               | 1                | 0              | -2.027563               | -0.668115 | 2.134111  |
| 30               | 6                | 0              | -3.942585               | -1.613268 | -0.006028 |
| 31               | 6                | 0              | -4.495822               | -0.476780 | -0.899391 |
| 32               | 6                | 0              | -5.801067               | 0.161746  | -0.420636 |
| 33               | 6                | 0              | -6.282771               | 1.344681  | -1.285299 |
| 34               | 6                | 0              | -5.719519               | 2.580980  | -0.567727 |
| 35               | 6                | 0              | -5.577034               | 2.095621  | 0.871015  |
| 36               | 8                | 0              | -5.618883               | 0.743347  | 0.916296  |
| 37               | 1                | 0              | -6.581952               | -0.590670 | -0.297709 |
| 38               | 1                | 0              | -7.377495               | 1.385619  | -1.291093 |
| 39               | 1                | 0              | -5.943639               | 1.257560  | -2.320454 |
| 40               | 1                | 0              | -4.693911               | 2.777837  | -0.911603 |
| 41               | 6                | 0              | -6.535348               | 3.868272  | -0.695451 |
| 42               | 1                | 0              | -3.969635               | -1.260222 | 1.029825  |
| 43               | 1                | 0              | -4.692204               | -0.863159 | -1.908039 |
| 44               | 1                | 0              | -3.753114               | 0.318316  | -1.016214 |
| 45               | 8                | 0              | -5.429412               | 2.762588  | 1.874371  |
| 46               | 1                | 0              | -6.093750               | 4.667273  | -0.093791 |
| 47               | 1                | 0              | -6.564346               | 4.197837  | -1.738485 |
| 48               | 1                | 0              | -7.565337               | 3.714262  | -0.356777 |
| 49               | 1                | 0              | 1.238850                | -0.967937 | -1.668717 |
| 50               | 6                | 0              | 2.952306                | 0.092574  | -0.964741 |
| 51               | 6                | 0              | 3.335177                | 0.155687  | -2.455334 |

|    |   |   |           |           |           |
|----|---|---|-----------|-----------|-----------|
| 52 | 6 | 0 | 3.237625  | 1.460352  | -0.282952 |
| 53 | 1 | 0 | 4.396961  | 0.364888  | -2.612097 |
| 54 | 1 | 0 | 3.112766  | -0.786676 | -2.963715 |
| 55 | 1 | 0 | 2.766471  | 0.950179  | -2.952423 |
| 56 | 6 | 0 | 4.710603  | 1.926465  | -0.249756 |
| 57 | 6 | 0 | 4.819158  | 3.259973  | 0.453257  |
| 58 | 8 | 0 | 4.938065  | 3.407898  | 1.658005  |
| 59 | 8 | 0 | 4.737309  | 4.294630  | -0.409247 |
| 60 | 6 | 0 | 4.778891  | 5.619276  | 0.165813  |
| 61 | 6 | 0 | 4.772810  | -1.868163 | -0.880964 |
| 62 | 1 | 0 | 4.066808  | -0.697776 | 0.736337  |
| 63 | 6 | 0 | 4.603159  | -3.003954 | -1.575364 |
| 64 | 6 | 0 | 6.157917  | -1.276784 | -0.739263 |
| 65 | 1 | 0 | 5.448323  | -3.494821 | -2.050332 |
| 66 | 1 | 0 | 3.640086  | -3.486546 | -1.704150 |
| 67 | 1 | 0 | 6.913049  | -1.928509 | -1.186809 |
| 68 | 1 | 0 | 6.234737  | -0.296863 | -1.223143 |
| 69 | 1 | 0 | 6.415881  | -1.128828 | 0.317185  |
| 70 | 1 | 0 | 5.117798  | 2.023507  | -1.259023 |
| 71 | 1 | 0 | 5.324025  | 1.221764  | 0.315156  |
| 72 | 1 | 0 | 2.861818  | 1.422288  | 0.741745  |
| 73 | 1 | 0 | 2.656319  | 2.225677  | -0.810593 |
| 74 | 8 | 0 | 2.531524  | -4.050872 | 1.661503  |
| 75 | 1 | 0 | 3.626384  | -2.435513 | 2.155869  |
| 76 | 6 | 0 | 1.215076  | -0.693613 | 2.860645  |
| 77 | 1 | 0 | 0.312027  | -1.306783 | 2.942049  |
| 78 | 1 | 0 | 2.077089  | -1.280163 | 3.202964  |
| 79 | 1 | 0 | 1.116022  | 0.180214  | 3.508904  |
| 80 | 6 | 0 | -4.880918 | -2.838070 | -0.074528 |
| 81 | 1 | 0 | -5.886551 | -2.577516 | 0.269858  |
| 82 | 1 | 0 | -4.975447 | -3.226127 | -1.094818 |
| 83 | 1 | 0 | -4.532944 | -3.653746 | 0.564149  |
| 84 | 1 | 0 | 4.701133  | 6.303182  | -0.678172 |
| 85 | 1 | 0 | 3.942624  | 5.760260  | 0.853909  |
| 86 | 1 | 0 | 5.720135  | 5.771104  | 0.698312  |

---



| Center<br>Number | Atomic<br>Number | Atomic<br>Type | Coordinates (Angstroms) |           |           |
|------------------|------------------|----------------|-------------------------|-----------|-----------|
|                  |                  |                | X                       | Y         | Z         |
| 1                | 6                | 0              | -0.894206               | 0.018077  | -1.196955 |
| 2                | 6                | 0              | 0.477859                | 0.728830  | -1.183639 |
| 3                | 1                | 0              | -0.931252               | -0.575696 | -2.114230 |
| 4                | 1                | 0              | -1.685810               | 0.770997  | -1.281775 |
| 5                | 1                | 0              | 0.525202                | 1.487425  | -0.397163 |
| 6                | 1                | 0              | 0.606318                | 1.249143  | -2.140141 |
| 7                | 6                | 0              | 3.824304                | -0.928911 | -0.203833 |
| 8                | 6                | 0              | 2.746033                | -1.916692 | 0.315204  |
| 9                | 6                | 0              | 1.461421                | -1.013661 | 0.378600  |
| 10               | 6                | 0              | 1.571765                | -0.323172 | -0.998354 |
| 11               | 6                | 0              | 3.202847                | -2.626413 | 1.569957  |
| 12               | 1                | 0              | 2.523222                | -2.697855 | -0.418941 |
| 13               | 8                | 0              | 1.594241                | 0.024002  | 1.373252  |
| 14               | 6                | 0              | -1.675295               | -3.175469 | 0.810666  |
| 15               | 6                | 0              | -2.210495               | -2.097909 | -0.189415 |
| 16               | 6                | 0              | -1.163626               | -0.889805 | 0.041615  |
| 17               | 6                | 0              | 0.103901                | -1.674340 | 0.464980  |
| 18               | 6                | 0              | -0.200176               | -2.901340 | 0.900974  |
| 19               | 1                | 0              | -2.143639               | -3.073360 | 1.801787  |
| 20               | 1                | 0              | -1.892280               | -4.195474 | 0.473302  |
| 21               | 6                | 0              | -2.071087               | -2.694426 | -1.609050 |
| 22               | 6                | 0              | -1.593355               | 0.018388  | 1.223820  |
| 23               | 1                | 0              | 0.514324                | -3.620877 | 1.286956  |
| 24               | 1                | 0              | -2.424434               | -2.021097 | -2.394125 |
| 25               | 1                | 0              | -1.027942               | -2.942022 | -1.828277 |
| 26               | 1                | 0              | -2.648656               | -3.620324 | -1.687510 |
| 27               | 1                | 0              | -0.813267               | 0.751831  | 1.438663  |
| 28               | 1                | 0              | -2.510708               | 0.568349  | 0.996657  |
| 29               | 1                | 0              | -1.765675               | -0.559270 | 2.137141  |
| 30               | 6                | 0              | -3.711016               | -1.762023 | 0.119109  |
| 31               | 6                | 0              | -4.317761               | -0.715470 | -0.845446 |
| 32               | 6                | 0              | -5.696626               | -0.179397 | -0.455924 |
| 33               | 6                | 0              | -6.220701               | 0.947938  | -1.368876 |
| 34               | 6                | 0              | -5.815713               | 2.237201  | -0.637481 |
| 35               | 6                | 0              | -5.713308               | 1.781210  | 0.814329  |
| 36               | 8                | 0              | -5.644024               | 0.431326  | 0.879045  |
| 37               | 1                | 0              | -6.419151               | -0.992191 | -0.368055 |
| 38               | 1                | 0              | -7.311982               | 0.892615  | -1.446301 |
| 39               | 1                | 0              | -5.808040               | 0.879713  | -2.378462 |
| 40               | 1                | 0              | -4.794938               | 2.526634  | -0.925320 |
| 41               | 6                | 0              | -6.738935               | 3.441536  | -0.829641 |
| 42               | 1                | 0              | -3.738477               | -1.333542 | 1.126384  |
| 43               | 1                | 0              | -4.430991               | -1.154025 | -1.845337 |
| 44               | 1                | 0              | -3.641670               | 0.137568  | -0.959785 |
| 45               | 8                | 0              | -5.679484               | 2.469667  | 1.813656  |
| 46               | 1                | 0              | -6.406317               | 4.285186  | -0.218939 |
| 47               | 1                | 0              | -6.741112               | 3.754565  | -1.878129 |
| 48               | 1                | 0              | -7.767315               | 3.196372  | -0.543800 |
| 49               | 1                | 0              | 1.320715                | -1.126384 | -1.704784 |
| 50               | 6                | 0              | 3.086524                | -0.010010 | -1.274225 |
| 51               | 6                | 0              | 3.390275                | -0.460164 | -2.721198 |

|    |   |   |           |           |           |
|----|---|---|-----------|-----------|-----------|
| 52 | 6 | 0 | 3.471867  | 1.493738  | -1.200540 |
| 53 | 1 | 0 | 4.430658  | -0.271246 | -3.003128 |
| 54 | 1 | 0 | 3.198610  | -1.528687 | -2.858020 |
| 55 | 1 | 0 | 2.751345  | 0.088734  | -3.423270 |
| 56 | 6 | 0 | 3.442502  | 2.204150  | 0.156783  |
| 57 | 6 | 0 | 3.617385  | 3.702143  | 0.036124  |
| 58 | 8 | 0 | 3.516898  | 4.358844  | -0.985996 |
| 59 | 8 | 0 | 3.884812  | 4.258019  | 1.238313  |
| 60 | 6 | 0 | 4.023884  | 5.694914  | 1.268915  |
| 61 | 6 | 0 | 5.138164  | -1.564405 | -0.633058 |
| 62 | 1 | 0 | 4.064665  | -0.284754 | 0.651009  |
| 63 | 6 | 0 | 5.270304  | -2.862158 | -0.948037 |
| 64 | 6 | 0 | 6.338434  | -0.644185 | -0.648784 |
| 65 | 1 | 0 | 6.236102  | -3.269636 | -1.234833 |
| 66 | 1 | 0 | 4.440676  | -3.561449 | -0.936541 |
| 67 | 1 | 0 | 7.248190  | -1.179209 | -0.934062 |
| 68 | 1 | 0 | 6.202456  | 0.187477  | -1.349645 |
| 69 | 1 | 0 | 6.499001  | -0.196644 | 0.340504  |
| 70 | 1 | 0 | 4.220482  | 1.838226  | 0.834239  |
| 71 | 1 | 0 | 2.498331  | 2.027346  | 0.682116  |
| 72 | 1 | 0 | 2.812764  | 2.036517  | -1.885968 |
| 73 | 1 | 0 | 4.477324  | 1.610706  | -1.621630 |
| 74 | 8 | 0 | 2.863040  | -3.752722 | 1.892598  |
| 75 | 1 | 0 | 3.922512  | -2.070670 | 2.205006  |
| 76 | 6 | 0 | 1.476442  | -0.336164 | 2.746485  |
| 77 | 1 | 0 | 1.288768  | 0.590827  | 3.293720  |
| 78 | 1 | 0 | 0.647856  | -1.029868 | 2.920291  |
| 79 | 1 | 0 | 2.403133  | -0.780965 | 3.130602  |
| 80 | 6 | 0 | -4.601002 | -3.023830 | 0.159055  |
| 81 | 1 | 0 | -5.596172 | -2.785227 | 0.546325  |
| 82 | 1 | 0 | -4.733347 | -3.465343 | -0.835181 |
| 83 | 1 | 0 | -4.187280 | -3.793496 | 0.815154  |
| 84 | 1 | 0 | 4.852297  | 6.010215  | 0.630820  |
| 85 | 1 | 0 | 3.101288  | 6.173347  | 0.932992  |
| 86 | 1 | 0 | 4.226719  | 5.943356  | 2.309796  |

---

| Center<br>Number | Atomic<br>Number | Atomic<br>Type | Coordinates (Angstroms) |           |           |
|------------------|------------------|----------------|-------------------------|-----------|-----------|
|                  |                  |                | X                       | Y         | Z         |
| 1                | 6                | 0              | -0.955114               | 0.178442  | -1.177880 |
| 2                | 6                | 0              | 0.443171                | 0.825990  | -1.082930 |
| 3                | 1                | 0              | -0.974686               | -0.405760 | -2.102141 |
| 4                | 1                | 0              | -1.706047               | 0.968351  | -1.291436 |
| 5                | 1                | 0              | 0.489150                | 1.552465  | -0.266636 |
| 6                | 1                | 0              | 0.636842                | 1.376166  | -2.011903 |
| 7                | 6                | 0              | 3.671251                | -1.138244 | -0.151432 |
| 8                | 6                | 0              | 2.491840                | -2.013867 | 0.366085  |
| 9                | 6                | 0              | 1.285036                | -1.016543 | 0.449112  |
| 10               | 6                | 0              | 1.490553                | -0.270856 | -0.888281 |
| 11               | 6                | 0              | 2.894008                | -2.785374 | 1.602033  |
| 12               | 1                | 0              | 2.194231                | -2.760388 | -0.374076 |
| 13               | 8                | 0              | 1.465586                | -0.039021 | 1.496503  |
| 14               | 6                | 0              | -1.989929               | -2.988958 | 0.747866  |
| 15               | 6                | 0              | -2.435859               | -1.858709 | -0.237198 |
| 16               | 6                | 0              | -1.319529               | -0.724237 | 0.038068  |
| 17               | 6                | 0              | -0.114385               | -1.592992 | 0.474287  |
| 18               | 6                | 0              | -0.503016               | -2.808537 | 0.874483  |
| 19               | 1                | 0              | -2.470605               | -2.877315 | 1.732012  |
| 20               | 1                | 0              | -2.264628               | -3.985877 | 0.384281  |
| 21               | 6                | 0              | -2.310223               | -2.429810 | -1.668442 |
| 22               | 6                | 0              | -1.718925               | 0.195115  | 1.222219  |
| 23               | 1                | 0              | 0.155710                | -3.579261 | 1.260910  |
| 24               | 1                | 0              | -2.607784               | -1.716306 | -2.441387 |
| 25               | 1                | 0              | -1.281115               | -2.737508 | -1.877811 |
| 26               | 1                | 0              | -2.942700               | -3.315698 | -1.779669 |
| 27               | 1                | 0              | -0.891384               | 0.860073  | 1.478112  |
| 28               | 1                | 0              | -2.583385               | 0.817750  | 0.975094  |
| 29               | 1                | 0              | -1.965792               | -0.383142 | 2.118239  |
| 30               | 6                | 0              | -3.915823               | -1.431350 | 0.052353  |
| 31               | 6                | 0              | -4.441974               | -0.346634 | -0.918151 |
| 32               | 6                | 0              | -5.712548               | 0.368960  | -0.478619 |
| 33               | 6                | 0              | -6.247742               | 1.412499  | -1.474161 |
| 34               | 6                | 0              | -6.875961               | 2.489551  | -0.573822 |
| 35               | 6                | 0              | -6.103857               | 2.321422  | 0.731844  |
| 36               | 8                | 0              | -5.443975               | 1.139990  | 0.742703  |
| 37               | 1                | 0              | -6.497066               | -0.346870 | -0.212457 |
| 38               | 1                | 0              | -6.958215               | 0.970493  | -2.177925 |
| 39               | 1                | 0              | -5.416092               | 1.832502  | -2.050542 |
| 40               | 1                | 0              | -6.691209               | 3.500943  | -0.947196 |
| 41               | 6                | 0              | -8.388078               | 2.319525  | -0.330591 |
| 42               | 1                | 0              | -3.929740               | -1.005117 | 1.060983  |
| 43               | 1                | 0              | -4.658509               | -0.797320 | -1.895956 |
| 44               | 1                | 0              | -3.683587               | 0.421410  | -1.094352 |
| 45               | 8                | 0              | -6.056560               | 3.087404  | 1.672829  |
| 46               | 1                | 0              | -8.747471               | 3.051586  | 0.398059  |
| 47               | 1                | 0              | -8.932643               | 2.469482  | -1.267644 |
| 48               | 1                | 0              | -8.626469               | 1.318328  | 0.044370  |
| 49               | 1                | 0              | 1.279693                | -1.031765 | -1.653736 |
| 50               | 6                | 0              | 3.016688                | 0.038376  | -1.023505 |
| 51               | 6                | 0              | 3.403069                | -0.017037 | -2.513608 |

|    |   |   |           |           |           |
|----|---|---|-----------|-----------|-----------|
| 52 | 6 | 0 | 3.334175  | 1.446183  | -0.445863 |
| 53 | 1 | 0 | 4.471083  | 0.149824  | -2.678768 |
| 54 | 1 | 0 | 3.155735  | -0.986727 | -2.954486 |
| 55 | 1 | 0 | 2.858902  | 0.756002  | -3.068808 |
| 56 | 6 | 0 | 4.802550  | 1.882826  | -0.453223 |
| 57 | 6 | 0 | 4.994940  | 3.300340  | 0.046790  |
| 58 | 8 | 0 | 4.122446  | 4.140788  | 0.172594  |
| 59 | 8 | 0 | 6.293960  | 3.544403  | 0.325791  |
| 60 | 6 | 0 | 6.618766  | 4.880547  | 0.767864  |
| 61 | 6 | 0 | 4.794552  | -1.953311 | -0.792535 |
| 62 | 1 | 0 | 4.106550  | -0.656758 | 0.734613  |
| 63 | 6 | 0 | 4.602234  | -3.129016 | -1.410539 |
| 64 | 6 | 0 | 6.192564  | -1.386447 | -0.680074 |
| 65 | 1 | 0 | 5.438421  | -3.670344 | -1.844914 |
| 66 | 1 | 0 | 3.628512  | -3.595796 | -1.515598 |
| 67 | 1 | 0 | 6.935424  | -2.086524 | -1.071667 |
| 68 | 1 | 0 | 6.297378  | -0.446517 | -1.232955 |
| 69 | 1 | 0 | 6.445333  | -1.167855 | 0.365375  |
| 70 | 1 | 0 | 5.231608  | 1.858737  | -1.463297 |
| 71 | 1 | 0 | 5.432997  | 1.231362  | 0.158339  |
| 72 | 1 | 0 | 2.958402  | 1.496719  | 0.578350  |
| 73 | 1 | 0 | 2.763936  | 2.184011  | -1.019534 |
| 74 | 8 | 0 | 2.506651  | -3.909109 | 1.876059  |
| 75 | 1 | 0 | 3.624490  | -2.282037 | 2.268638  |
| 76 | 6 | 0 | 1.261944  | -0.446950 | 2.845579  |
| 77 | 1 | 0 | 1.151861  | 0.469802  | 3.429857  |
| 78 | 1 | 0 | 0.360679  | -1.057126 | 2.961123  |
| 79 | 1 | 0 | 2.122749  | -1.003944 | 3.237341  |
| 80 | 6 | 0 | -4.884437 | -2.634045 | 0.072567  |
| 81 | 1 | 0 | -5.883752 | -2.323437 | 0.393159  |
| 82 | 1 | 0 | -4.988360 | -3.094250 | -0.916328 |
| 83 | 1 | 0 | -4.558060 | -3.408729 | 0.770957  |
| 84 | 1 | 0 | 6.347489  | 5.610381  | 0.001977  |
| 85 | 1 | 0 | 6.091834  | 5.111874  | 1.696090  |
| 86 | 1 | 0 | 7.695790  | 4.877311  | 0.929730  |

---

| Center<br>Number | Atomic<br>Number | Atomic<br>Type | Coordinates (Angstroms) |           |           |
|------------------|------------------|----------------|-------------------------|-----------|-----------|
|                  |                  |                | X                       | Y         | Z         |
| 1                | 6                | 0              | -1.135653               | 0.111763  | -1.125949 |
| 2                | 6                | 0              | 0.256548                | 0.773901  | -1.052572 |
| 3                | 1                | 0              | -1.165745               | -0.466084 | -2.053807 |
| 4                | 1                | 0              | -1.898392               | 0.892896  | -1.219886 |
| 5                | 1                | 0              | 0.309800                | 1.497994  | -0.234583 |
| 6                | 1                | 0              | 0.428237                | 1.328639  | -1.982957 |
| 7                | 6                | 0              | 3.527412                | -1.191615 | -0.253083 |
| 8                | 6                | 0              | 2.379068                | -2.021494 | 0.384267  |
| 9                | 6                | 0              | 1.148247                | -1.056950 | 0.465115  |
| 10               | 6                | 0              | 1.317271                | -0.312707 | -0.878310 |
| 11               | 6                | 0              | 2.795974                | -2.756820 | 1.636438  |
| 12               | 1                | 0              | 2.056537                | -2.822436 | -0.294989 |
| 13               | 8                | 0              | 1.312844                | -0.067080 | 1.504768  |
| 14               | 6                | 0              | -2.104865               | -3.076267 | 0.799975  |
| 15               | 6                | 0              | -2.573563               | -1.950783 | -0.179296 |
| 16               | 6                | 0              | -1.468679               | -0.803767 | 0.089077  |
| 17               | 6                | 0              | -0.243998               | -1.656474 | 0.507400  |
| 18               | 6                | 0              | -0.619222               | -2.875870 | 0.908588  |
| 19               | 1                | 0              | -2.575810               | -2.970823 | 1.789314  |
| 20               | 1                | 0              | -2.369920               | -4.076351 | 0.438347  |
| 21               | 6                | 0              | -2.453358               | -2.519142 | -1.612038 |
| 22               | 6                | 0              | -1.864361               | 0.101042  | 1.285460  |
| 23               | 1                | 0              | 0.040652                | -3.649092 | 1.289643  |
| 24               | 1                | 0              | -2.765237               | -1.808358 | -2.381554 |
| 25               | 1                | 0              | -1.422914               | -2.815406 | -1.831281 |
| 26               | 1                | 0              | -3.077851               | -3.411275 | -1.718405 |
| 27               | 1                | 0              | -1.044439               | 0.778084  | 1.532914  |
| 28               | 1                | 0              | -2.741744               | 0.711430  | 1.054334  |
| 29               | 1                | 0              | -2.090545               | -0.485649 | 2.181225  |
| 30               | 6                | 0              | -4.056419               | -1.543003 | 0.124983  |
| 31               | 6                | 0              | -4.604866               | -0.459644 | -0.834072 |
| 32               | 6                | 0              | -5.915512               | 0.199668  | -0.400293 |
| 33               | 6                | 0              | -6.384145               | 1.346138  | -1.319688 |
| 34               | 6                | 0              | -5.837146               | 2.612335  | -0.642530 |
| 35               | 6                | 0              | -5.711755               | 2.184293  | 0.815890  |
| 36               | 8                | 0              | -5.750649               | 0.834671  | 0.914005  |
| 37               | 1                | 0              | -6.699107               | -0.546485 | -0.258044 |
| 38               | 1                | 0              | -7.478656               | 1.383244  | -1.346652 |
| 39               | 1                | 0              | -6.026373               | 1.218811  | -2.344381 |
| 40               | 1                | 0              | -4.808227               | 2.802662  | -0.979840 |
| 41               | 6                | 0              | -6.659154               | 3.888310  | -0.830839 |
| 42               | 1                | 0              | -4.067520               | -1.122556 | 1.135715  |
| 43               | 1                | 0              | -4.792755               | -0.900182 | -1.821868 |
| 44               | 1                | 0              | -3.863056               | 0.329795  | -0.987939 |
| 45               | 8                | 0              | -5.579263               | 2.890311  | 1.794234  |
| 46               | 1                | 0              | -6.230419               | 4.712977  | -0.255136 |
| 47               | 1                | 0              | -6.676278               | 4.176614  | -1.886255 |
| 48               | 1                | 0              | -7.692591               | 3.740636  | -0.499780 |
| 49               | 1                | 0              | 1.097420                | -1.079991 | -1.635941 |
| 50               | 6                | 0              | 2.834732                | 0.008519  | -1.056087 |
| 51               | 6                | 0              | 3.160743                | 0.028881  | -2.562431 |

|    |   |   |           |           |           |
|----|---|---|-----------|-----------|-----------|
| 52 | 6 | 0 | 3.185168  | 1.389406  | -0.433232 |
| 53 | 1 | 0 | 4.226813  | 0.171102  | -2.760917 |
| 54 | 1 | 0 | 2.865755  | -0.903202 | -3.051228 |
| 55 | 1 | 0 | 2.622325  | 0.851292  | -3.047786 |
| 56 | 6 | 0 | 4.657359  | 1.811001  | -0.509434 |
| 57 | 6 | 0 | 4.900785  | 3.199292  | 0.045328  |
| 58 | 8 | 0 | 4.059844  | 4.067978  | 0.195046  |
| 59 | 8 | 0 | 6.205907  | 3.384658  | 0.339931  |
| 60 | 6 | 0 | 6.577321  | 4.692074  | 0.828243  |
| 61 | 6 | 0 | 4.535595  | -2.046498 | -1.021497 |
| 62 | 1 | 0 | 4.077550  | -0.745883 | 0.581268  |
| 63 | 6 | 0 | 4.196942  | -3.102666 | -1.775731 |
| 64 | 6 | 0 | 5.984895  | -1.641067 | -0.887736 |
| 65 | 1 | 0 | 4.952902  | -3.675907 | -2.305748 |
| 66 | 1 | 0 | 3.170968  | -3.435140 | -1.905614 |
| 67 | 1 | 0 | 6.645330  | -2.329425 | -1.422254 |
| 68 | 1 | 0 | 6.158763  | -0.633465 | -1.283668 |
| 69 | 1 | 0 | 6.283993  | -1.621828 | 0.167550  |
| 70 | 1 | 0 | 5.019142  | 1.834902  | -1.545741 |
| 71 | 1 | 0 | 5.315059  | 1.120409  | 0.025825  |
| 72 | 1 | 0 | 2.870946  | 1.393926  | 0.612475  |
| 73 | 1 | 0 | 2.588663  | 2.156005  | -0.938830 |
| 74 | 8 | 0 | 3.915725  | -2.729413 | 2.118581  |
| 75 | 1 | 0 | 2.018665  | -3.390908 | 2.105877  |
| 76 | 6 | 0 | 1.156331  | -0.474564 | 2.861030  |
| 77 | 1 | 0 | 0.263997  | -1.092911 | 3.004943  |
| 78 | 1 | 0 | 2.035509  | -1.015867 | 3.229281  |
| 79 | 1 | 0 | 1.050227  | 0.443429  | 3.444077  |
| 80 | 6 | 0 | -5.010663 | -2.757335 | 0.147851  |
| 81 | 1 | 0 | -6.003028 | -2.464850 | 0.504470  |
| 82 | 1 | 0 | -5.138113 | -3.199061 | -0.846798 |
| 83 | 1 | 0 | -4.655929 | -3.542152 | 0.820577  |
| 84 | 1 | 0 | 7.651933  | 4.642315  | 0.998357  |
| 85 | 1 | 0 | 6.340915  | 5.456505  | 0.084797  |
| 86 | 1 | 0 | 6.051080  | 4.912875  | 1.759387  |

---

| Center<br>Number | Atomic<br>Number | Atomic<br>Type | Coordinates (Angstroms) |           |           |
|------------------|------------------|----------------|-------------------------|-----------|-----------|
|                  |                  |                | X                       | Y         | Z         |
| 1                | 6                | 0              | -0.704470               | 0.214670  | -1.067228 |
| 2                | 6                | 0              | 0.674688                | 0.863089  | -0.816097 |
| 3                | 1                | 0              | -0.674406               | -0.210940 | -2.074089 |
| 4                | 1                | 0              | -1.467980               | 1.000571  | -1.083430 |
| 5                | 1                | 0              | 0.672486                | 1.460970  | 0.100604  |
| 6                | 1                | 0              | 0.880035                | 1.544395  | -1.649336 |
| 7                | 6                | 0              | 3.893939                | -1.128826 | 0.046178  |
| 8                | 6                | 0              | 2.734402                | -2.130351 | 0.274997  |
| 9                | 6                | 0              | 1.491252                | -1.184438 | 0.440096  |
| 10               | 6                | 0              | 1.745982                | -0.227422 | -0.746123 |
| 11               | 6                | 0              | 3.068805                | -3.105972 | 1.380835  |
| 12               | 1                | 0              | 2.527627                | -2.731245 | -0.615968 |
| 13               | 8                | 0              | 1.590752                | -0.373594 | 1.631371  |
| 14               | 6                | 0              | -1.733695               | -3.248435 | 0.247152  |
| 15               | 6                | 0              | -2.173926               | -1.973034 | -0.544259 |
| 16               | 6                | 0              | -1.097428               | -0.881486 | -0.034111 |
| 17               | 6                | 0              | 0.110590                | -1.786877 | 0.302668  |
| 18               | 6                | 0              | -0.258987               | -3.061544 | 0.468294  |
| 19               | 1                | 0              | -2.254715               | -3.321490 | 1.214056  |
| 20               | 1                | 0              | -1.965346               | -4.172007 | -0.296006 |
| 21               | 6                | 0              | -1.983069               | -2.285426 | -2.046418 |
| 22               | 6                | 0              | -1.571218               | -0.178547 | 1.265298  |
| 23               | 1                | 0              | 0.405765                | -3.873161 | 0.744275  |
| 24               | 1                | 0              | -2.269527               | -1.453638 | -2.695236 |
| 25               | 1                | 0              | -0.939911               | -2.534129 | -2.264953 |
| 26               | 1                | 0              | -2.588550               | -3.150005 | -2.334686 |
| 27               | 1                | 0              | -0.776911               | 0.458746  | 1.659137  |
| 28               | 1                | 0              | -2.447869               | 0.450201  | 1.086067  |
| 29               | 1                | 0              | -1.830559               | -0.901516 | 2.045185  |
| 30               | 6                | 0              | -3.674180               | -1.632669 | -0.243693 |
| 31               | 6                | 0              | -4.194664               | -0.403972 | -1.028874 |
| 32               | 6                | 0              | -5.500973               | 0.192840  | -0.522167 |
| 33               | 6                | 0              | -6.031653               | 1.387133  | -1.333286 |
| 34               | 6                | 0              | -6.732827               | 2.260998  | -0.279653 |
| 35               | 6                | 0              | -6.000343               | 1.880897  | 1.004132  |
| 36               | 8                | 0              | -5.300529               | 0.736066  | 0.828103  |
| 37               | 1                | 0              | -6.272677               | -0.577278 | -0.422375 |
| 38               | 1                | 0              | -6.697410               | 1.064523  | -2.138362 |
| 39               | 1                | 0              | -5.192643               | 1.929182  | -1.783432 |
| 40               | 1                | 0              | -6.574690               | 3.329013  | -0.455096 |
| 41               | 6                | 0              | -8.244989               | 2.001156  | -0.135490 |
| 42               | 1                | 0              | -3.734973               | -1.389985 | 0.822479  |
| 43               | 1                | 0              | -4.362205               | -0.678969 | -2.078814 |
| 44               | 1                | 0              | -3.451798               | 0.398822  | -1.034140 |
| 45               | 8                | 0              | -6.010711               | 2.465424  | 2.068450  |
| 46               | 1                | 0              | -8.658680               | 2.575014  | 0.698493  |
| 47               | 1                | 0              | -8.760706               | 2.303708  | -1.051783 |
| 48               | 1                | 0              | -8.457991               | 0.941125  | 0.039807  |
| 49               | 1                | 0              | 1.588940                | -0.856513 | -1.634254 |
| 50               | 6                | 0              | 3.275284                | 0.111271  | -0.756381 |
| 51               | 6                | 0              | 3.751139                | 0.164806  | -2.220974 |

|    |   |   |           |           |           |
|----|---|---|-----------|-----------|-----------|
| 52 | 6 | 0 | 3.677664  | 1.408449  | 0.004717  |
| 53 | 1 | 0 | 4.799044  | 0.470367  | -2.307769 |
| 54 | 1 | 0 | 3.650878  | -0.811981 | -2.702969 |
| 55 | 1 | 0 | 3.149819  | 0.878241  | -2.795211 |
| 56 | 6 | 0 | 3.435742  | 2.748347  | -0.702788 |
| 57 | 6 | 0 | 3.988091  | 3.924975  | 0.075303  |
| 58 | 8 | 0 | 4.792400  | 3.866956  | 0.988641  |
| 59 | 8 | 0 | 3.490083  | 5.091261  | -0.389515 |
| 60 | 6 | 0 | 3.978688  | 6.297156  | 0.237471  |
| 61 | 6 | 0 | 5.178124  | -1.734847 | -0.501731 |
| 62 | 1 | 0 | 4.145102  | -0.736413 | 1.040793  |
| 63 | 6 | 0 | 5.228789  | -2.904765 | -1.157506 |
| 64 | 6 | 0 | 6.446376  | -0.956813 | -0.227529 |
| 65 | 1 | 0 | 6.175237  | -3.301092 | -1.515692 |
| 66 | 1 | 0 | 4.350376  | -3.508044 | -1.361719 |
| 67 | 1 | 0 | 6.582190  | -0.801611 | 0.850389  |
| 68 | 1 | 0 | 7.325466  | -1.480504 | -0.612891 |
| 69 | 1 | 0 | 6.420757  | 0.038976  | -0.684558 |
| 70 | 1 | 0 | 2.378512  | 2.944315  | -0.893302 |
| 71 | 1 | 0 | 3.928707  | 2.775871  | -1.682874 |
| 72 | 1 | 0 | 4.748786  | 1.349881  | 0.223289  |
| 73 | 1 | 0 | 3.170111  | 1.413179  | 0.973230  |
| 74 | 8 | 0 | 2.685578  | -4.263232 | 1.426591  |
| 75 | 1 | 0 | 3.742277  | -2.723017 | 2.174646  |
| 76 | 6 | 0 | 1.360926  | -0.995815 | 2.891865  |
| 77 | 1 | 0 | 0.509113  | -1.682941 | 2.863239  |
| 78 | 1 | 0 | 2.247805  | -1.538460 | 3.243642  |
| 79 | 1 | 0 | 1.148666  | -0.191183 | 3.600040  |
| 80 | 6 | 0 | -4.610056 | -2.839175 | -0.473792 |
| 81 | 1 | 0 | -5.626929 | -2.612416 | -0.138360 |
| 82 | 1 | 0 | -4.670301 | -3.115273 | -1.532397 |
| 83 | 1 | 0 | -4.284190 | -3.719595 | 0.085554  |
| 84 | 1 | 0 | 5.060031  | 6.380806  | 0.108475  |
| 85 | 1 | 0 | 3.468050  | 7.114059  | -0.270571 |
| 86 | 1 | 0 | 3.736598  | 6.296171  | 1.302298  |

---



| Center<br>Number | Atomic<br>Number | Atomic<br>Type | Coordinates (Angstroms) |           |           |
|------------------|------------------|----------------|-------------------------|-----------|-----------|
|                  |                  |                | X                       | Y         | Z         |
| 1                | 6                | 0              | -0.790091               | 0.037265  | -1.226760 |
| 2                | 6                | 0              | 0.589313                | 0.733682  | -1.220406 |
| 3                | 1                | 0              | -0.826748               | -0.579017 | -2.129090 |
| 4                | 1                | 0              | -1.571721               | 0.797325  | -1.336228 |
| 5                | 1                | 0              | 0.638269                | 1.511438  | -0.453181 |
| 6                | 1                | 0              | 0.730567                | 1.228250  | -2.188708 |
| 7                | 6                | 0              | 3.909798                | -0.928188 | -0.166555 |
| 8                | 6                | 0              | 2.818115                | -1.895339 | 0.362978  |
| 9                | 6                | 0              | 1.541192                | -0.979561 | 0.392802  |
| 10               | 6                | 0              | 1.671075                | -0.323690 | -0.999374 |
| 11               | 6                | 0              | 3.256306                | -2.580703 | 1.637706  |
| 12               | 1                | 0              | 2.596334                | -2.690580 | -0.356225 |
| 13               | 8                | 0              | 1.675768                | 0.080302  | 1.363546  |
| 14               | 6                | 0              | -1.620688               | -3.098427 | 0.851820  |
| 15               | 6                | 0              | -2.139881               | -2.037071 | -0.172910 |
| 16               | 6                | 0              | -1.079270               | -0.835213 | 0.033101  |
| 17               | 6                | 0              | 0.176099                | -1.623970 | 0.483342  |
| 18               | 6                | 0              | -0.143143               | -2.838258 | 0.943510  |
| 19               | 1                | 0              | -2.091052               | -2.969648 | 1.838812  |
| 20               | 1                | 0              | -1.849186               | -4.122778 | 0.535541  |
| 21               | 6                | 0              | -2.005143               | -2.663740 | -1.580025 |
| 22               | 6                | 0              | -1.508404               | 0.110371  | 1.185653  |
| 23               | 1                | 0              | 0.561578                | -3.556000 | 1.350182  |
| 24               | 1                | 0              | -2.353013               | -2.002424 | -2.377852 |
| 25               | 1                | 0              | -0.963691               | -2.923272 | -1.793619 |
| 26               | 1                | 0              | -2.588943               | -3.587054 | -1.641523 |
| 27               | 1                | 0              | -0.722481               | 0.841840  | 1.386102  |
| 28               | 1                | 0              | -2.419614               | 0.660240  | 0.935081  |
| 29               | 1                | 0              | -1.691648               | -0.440404 | 2.113667  |
| 30               | 6                | 0              | -3.636184               | -1.674889 | 0.122881  |
| 31               | 6                | 0              | -4.232640               | -0.663843 | -0.885918 |
| 32               | 6                | 0              | -5.527545               | 0.011232  | -0.453712 |
| 33               | 6                | 0              | -6.134038               | 0.974920  | -1.487951 |
| 34               | 6                | 0              | -6.794620               | 2.066136  | -0.628811 |
| 35               | 6                | 0              | -5.986689               | 2.003864  | 0.664309  |
| 36               | 8                | 0              | -5.271070               | 0.856778  | 0.720444  |
| 37               | 1                | 0              | -6.270325               | -0.726339 | -0.132952 |
| 38               | 1                | 0              | -6.837262               | 0.463879  | -2.150966 |
| 39               | 1                | 0              | -5.336658               | 1.403668  | -2.104826 |
| 40               | 1                | 0              | -6.668109               | 3.064339  | -1.057928 |
| 41               | 6                | 0              | -8.290843               | 1.837124  | -0.339866 |
| 42               | 1                | 0              | -3.658594               | -1.204971 | 1.111862  |
| 43               | 1                | 0              | -4.444626               | -1.170562 | -1.836861 |
| 44               | 1                | 0              | -3.515250               | 0.129856  | -1.112707 |
| 45               | 8                | 0              | -5.955032               | 2.820416  | 1.562557  |
| 46               | 1                | 0              | -8.668446               | 2.586976  | 0.360922  |
| 47               | 1                | 0              | -8.862942               | 1.914337  | -1.269268 |
| 48               | 1                | 0              | -8.472349               | 0.845923  | 0.089483  |
| 49               | 1                | 0              | 1.419285                | -1.141364 | -1.688682 |
| 50               | 6                | 0              | 3.191325                | -0.030325 | -1.267245 |
| 51               | 6                | 0              | 3.506173                | -0.518572 | -2.699386 |

|    |   |   |           |           |           |
|----|---|---|-----------|-----------|-----------|
| 52 | 6 | 0 | 3.588642  | 1.471598  | -1.227425 |
| 53 | 1 | 0 | 4.550847  | -0.344467 | -2.975078 |
| 54 | 1 | 0 | 3.307423  | -1.588592 | -2.812523 |
| 55 | 1 | 0 | 2.878869  | 0.017855  | -3.421297 |
| 56 | 6 | 0 | 3.553384  | 2.215758  | 0.111479  |
| 57 | 6 | 0 | 3.740794  | 3.708979  | -0.044583 |
| 58 | 8 | 0 | 3.670859  | 4.338917  | -1.085884 |
| 59 | 8 | 0 | 3.982259  | 4.294962  | 1.148840  |
| 60 | 6 | 0 | 4.131085  | 5.731155  | 1.144567  |
| 61 | 6 | 0 | 5.224026  | -1.582511 | -0.564562 |
| 62 | 1 | 0 | 4.143976  | -0.265636 | 0.675849  |
| 63 | 6 | 0 | 5.351046  | -2.888125 | -0.847648 |
| 64 | 6 | 0 | 6.430579  | -0.670663 | -0.587484 |
| 65 | 1 | 0 | 6.317442  | -3.308506 | -1.113024 |
| 66 | 1 | 0 | 4.516615  | -3.581527 | -0.830009 |
| 67 | 1 | 0 | 7.339915  | -1.217948 | -0.849980 |
| 68 | 1 | 0 | 6.308139  | 0.145686  | -1.308621 |
| 69 | 1 | 0 | 6.582860  | -0.201611 | 0.393126  |
| 70 | 1 | 0 | 4.323777  | 1.861400  | 0.803797  |
| 71 | 1 | 0 | 2.604295  | 2.057792  | 0.633777  |
| 72 | 1 | 0 | 2.939721  | 2.002249  | -1.931769 |
| 73 | 1 | 0 | 4.598442  | 1.569747  | -1.642712 |
| 74 | 8 | 0 | 2.901670  | -3.695629 | 1.983304  |
| 75 | 1 | 0 | 3.976684  | -2.018131 | 2.265934  |
| 76 | 6 | 0 | 1.542190  | -0.246162 | 2.743667  |
| 77 | 1 | 0 | 0.702581  | -0.924075 | 2.926766  |
| 78 | 1 | 0 | 2.459323  | -0.695094 | 3.145706  |
| 79 | 1 | 0 | 1.363438  | 0.695934  | 3.267561  |
| 80 | 6 | 0 | -4.539433 | -2.924148 | 0.212913  |
| 81 | 1 | 0 | -5.551227 | -2.650376 | 0.528188  |
| 82 | 1 | 0 | -4.627290 | -3.437904 | -0.750853 |
| 83 | 1 | 0 | -4.167725 | -3.644926 | 0.945622  |
| 84 | 1 | 0 | 4.975921  | 6.023936  | 0.517359  |
| 85 | 1 | 0 | 3.219736  | 6.206509  | 0.775199  |
| 86 | 1 | 0 | 4.312034  | 6.005934  | 2.182861  |

---

| Center<br>Number | Atomic<br>Number | Atomic<br>Type | Coordinates (Angstroms) |           |           |
|------------------|------------------|----------------|-------------------------|-----------|-----------|
|                  |                  |                | X                       | Y         | Z         |
| 1                | 6                | 0              | -0.914254               | 0.110503  | -1.219663 |
| 2                | 6                | 0              | 0.472097                | 0.788391  | -1.173774 |
| 3                | 1                | 0              | -0.931905               | -0.517515 | -2.114652 |
| 4                | 1                | 0              | -1.682079               | 0.879181  | -1.362269 |
| 5                | 1                | 0              | 0.513106                | 1.552739  | -0.392702 |
| 6                | 1                | 0              | 0.643183                | 1.296826  | -2.130428 |
| 7                | 6                | 0              | 3.748676                | -1.061540 | -0.179713 |
| 8                | 6                | 0              | 2.592786                | -1.934027 | 0.391656  |
| 9                | 6                | 0              | 1.365957                | -0.959505 | 0.436405  |
| 10               | 6                | 0              | 1.542578                | -0.278435 | -0.939001 |
| 11               | 6                | 0              | 3.021138                | -2.637718 | 1.659539  |
| 12               | 1                | 0              | 2.303250                | -2.721876 | -0.308147 |
| 13               | 8                | 0              | 1.534666                | 0.074550  | 1.430552  |
| 14               | 6                | 0              | -1.862490               | -2.984401 | 0.860838  |
| 15               | 6                | 0              | -2.344079               | -1.908166 | -0.166646 |
| 16               | 6                | 0              | -1.247628               | -0.740243 | 0.042157  |
| 17               | 6                | 0              | -0.020432               | -1.562708 | 0.504737  |
| 18               | 6                | 0              | -0.378819               | -2.767297 | 0.962369  |
| 19               | 1                | 0              | -2.334492               | -2.841532 | 1.845052  |
| 20               | 1                | 0              | -2.119122               | -4.001677 | 0.543346  |
| 21               | 6                | 0              | -2.224583               | -2.539379 | -1.573065 |
| 22               | 6                | 0              | -1.653465               | 0.225687  | 1.186409  |
| 23               | 1                | 0              | 0.300312                | -3.505965 | 1.375209  |
| 24               | 1                | 0              | -2.544831               | -1.865564 | -2.372101 |
| 25               | 1                | 0              | -1.192043               | -2.835864 | -1.781893 |
| 26               | 1                | 0              | -2.840418               | -3.441463 | -1.638245 |
| 27               | 1                | 0              | -0.839845               | 0.922628  | 1.398763  |
| 28               | 1                | 0              | -2.536796               | 0.813931  | 0.922799  |
| 29               | 1                | 0              | -1.873383               | -0.315292 | 2.112208  |
| 30               | 6                | 0              | -3.828974               | -1.498409 | 0.123896  |
| 31               | 6                | 0              | -4.390129               | -0.469925 | -0.887261 |
| 32               | 6                | 0              | -5.673885               | 0.233023  | -0.466477 |
| 33               | 6                | 0              | -6.244129               | 1.218835  | -1.500442 |
| 34               | 6                | 0              | -6.892868               | 2.316315  | -0.640318 |
| 35               | 6                | 0              | -6.102883               | 2.226046  | 0.662285  |
| 36               | 8                | 0              | -5.413217               | 1.063009  | 0.717663  |
| 37               | 1                | 0              | -6.438112               | -0.489287 | -0.161881 |
| 38               | 1                | 0              | -6.948737               | 0.729081  | -2.177942 |
| 39               | 1                | 0              | -5.428736               | 1.635420  | -2.101983 |
| 40               | 1                | 0              | -6.740571               | 3.315317  | -1.059023 |
| 41               | 6                | 0              | -8.396876               | 2.115178  | -0.372034 |
| 42               | 1                | 0              | -3.838903               | -1.026346 | 1.112061  |
| 43               | 1                | 0              | -4.603640               | -0.967370 | -1.842741 |
| 44               | 1                | 0              | -3.651783               | 0.307670  | -1.102544 |
| 45               | 8                | 0              | -6.064856               | 3.034259  | 1.567752  |
| 46               | 1                | 0              | -8.768268               | 2.866642  | 0.330330  |
| 47               | 1                | 0              | -8.955542               | 2.211385  | -1.307811 |
| 48               | 1                | 0              | -8.603313               | 1.124262  | 0.046548  |
| 49               | 1                | 0              | 1.337937                | -1.079545 | -1.663839 |
| 50               | 6                | 0              | 3.061914                | 0.050429  | -1.107765 |
| 51               | 6                | 0              | 3.434981                | -0.077010 | -2.596505 |

|    |   |   |           |           |           |
|----|---|---|-----------|-----------|-----------|
| 52 | 6 | 0 | 3.355033  | 1.494212  | -0.610657 |
| 53 | 1 | 0 | 4.495441  | 0.113024  | -2.783157 |
| 54 | 1 | 0 | 3.212900  | -1.077472 | -2.977987 |
| 55 | 1 | 0 | 2.862266  | 0.646604  | -3.188222 |
| 56 | 6 | 0 | 4.827288  | 1.962714  | -0.656914 |
| 57 | 6 | 0 | 4.922148  | 3.411717  | -0.236941 |
| 58 | 8 | 0 | 4.721447  | 4.365235  | -0.970704 |
| 59 | 8 | 0 | 5.227115  | 3.542609  | 1.070680  |
| 60 | 6 | 0 | 5.289740  | 4.890382  | 1.587353  |
| 61 | 6 | 0 | 4.886602  | -1.883602 | -0.784743 |
| 62 | 1 | 0 | 4.177963  | -0.523815 | 0.676098  |
| 63 | 6 | 0 | 4.719273  | -3.098594 | -1.329624 |
| 64 | 6 | 0 | 6.269825  | -1.275141 | -0.720754 |
| 65 | 1 | 0 | 5.565201  | -3.643343 | -1.740115 |
| 66 | 1 | 0 | 3.757372  | -3.595891 | -1.395649 |
| 67 | 1 | 0 | 7.026361  | -1.974146 | -1.087022 |
| 68 | 1 | 0 | 6.341495  | -0.361955 | -1.321435 |
| 69 | 1 | 0 | 6.529448  | -0.997082 | 0.308756  |
| 70 | 1 | 0 | 5.226885  | 1.900574  | -1.672537 |
| 71 | 1 | 0 | 5.450452  | 1.360221  | 0.006831  |
| 72 | 1 | 0 | 2.989029  | 1.591252  | 0.414215  |
| 73 | 1 | 0 | 2.769742  | 2.185563  | -1.227516 |
| 74 | 8 | 0 | 2.645691  | -3.747695 | 1.998107  |
| 75 | 1 | 0 | 3.759019  | -2.096318 | 2.286854  |
| 76 | 6 | 0 | 1.366156  | -0.272843 | 2.801283  |
| 77 | 1 | 0 | 1.229394  | 0.666696  | 3.342128  |
| 78 | 1 | 0 | 0.490714  | -0.910099 | 2.961105  |
| 79 | 1 | 0 | 2.253722  | -0.776376 | 3.205198  |
| 80 | 6 | 0 | -4.771263 | -2.718780 | 0.212594  |
| 81 | 1 | 0 | -5.772408 | -2.414905 | 0.533953  |
| 82 | 1 | 0 | -4.879328 | -3.225245 | -0.753002 |
| 83 | 1 | 0 | -4.419139 | -3.454384 | 0.940132  |
| 84 | 1 | 0 | 5.535607  | 4.783953  | 2.642916  |
| 85 | 1 | 0 | 6.063727  | 5.459181  | 1.067685  |
| 86 | 1 | 0 | 4.325503  | 5.388192  | 1.464886  |

---

| Center<br>Number | Atomic<br>Number | Atomic<br>Type | Coordinates (Angstroms) |           |           |
|------------------|------------------|----------------|-------------------------|-----------|-----------|
|                  |                  |                | X                       | Y         | Z         |
| 1                | 6                | 0              | -0.891373               | 0.191303  | -1.141590 |
| 2                | 6                | 0              | 0.496097                | 0.854597  | -1.006084 |
| 3                | 1                | 0              | -0.895608               | -0.349669 | -2.091770 |
| 4                | 1                | 0              | -1.653335               | 0.974460  | -1.224111 |
| 5                | 1                | 0              | 0.523628                | 1.543627  | -0.156986 |
| 6                | 1                | 0              | 0.688392                | 1.448755  | -1.907985 |
| 7                | 6                | 0              | 3.747383                | -1.103051 | -0.138541 |
| 8                | 6                | 0              | 2.577296                | -2.015023 | 0.335854  |
| 9                | 6                | 0              | 1.354742                | -1.039755 | 0.450958  |
| 10               | 6                | 0              | 1.558476                | -0.234211 | -0.851388 |
| 11               | 6                | 0              | 2.983124                | -2.830692 | 1.542227  |
| 12               | 1                | 0              | 2.295033                | -2.734949 | -0.435982 |
| 13               | 8                | 0              | 1.512483                | -0.103999 | 1.538807  |
| 14               | 6                | 0              | -1.888810               | -3.077527 | 0.628768  |
| 15               | 6                | 0              | -2.344010               | -1.912455 | -0.310487 |
| 16               | 6                | 0              | -1.251086               | -0.772001 | 0.028121  |
| 17               | 6                | 0              | -0.035603               | -1.638550 | 0.438477  |
| 18               | 6                | 0              | -0.406789               | -2.877023 | 0.780377  |
| 19               | 1                | 0              | -2.382187               | -3.018459 | 1.611198  |
| 20               | 1                | 0              | -2.141616               | -4.062059 | 0.218472  |
| 21               | 6                | 0              | -2.192677               | -2.416790 | -1.764224 |
| 22               | 6                | 0              | -1.680604               | 0.086164  | 1.247081  |
| 23               | 1                | 0              | 0.262157                | -3.652271 | 1.139331  |
| 24               | 1                | 0              | -2.491811               | -1.673634 | -2.508053 |
| 25               | 1                | 0              | -1.156879               | -2.700550 | -1.974505 |
| 26               | 1                | 0              | -2.810640               | -3.305608 | -1.922530 |
| 27               | 1                | 0              | -0.866247               | 0.749913  | 1.544767  |
| 28               | 1                | 0              | -2.550635               | 0.707197  | 1.015609  |
| 29               | 1                | 0              | -1.930875               | -0.535497 | 2.112592  |
| 30               | 6                | 0              | -3.834794               | -1.524186 | -0.021190 |
| 31               | 6                | 0              | -4.371631               | -0.413160 | -0.956048 |
| 32               | 6                | 0              | -5.641596               | 0.284088  | -0.486197 |
| 33               | 6                | 0              | -6.201862               | 1.337406  | -1.457357 |
| 34               | 6                | 0              | -6.822625               | 2.397041  | -0.531592 |
| 35               | 6                | 0              | -6.027405               | 2.216406  | 0.758407  |
| 36               | 8                | 0              | -5.359540               | 1.039592  | 0.741853  |
| 37               | 1                | 0              | -6.415015               | -0.442742 | -0.217332 |
| 38               | 1                | 0              | -6.920820               | 0.899799  | -2.155235 |
| 39               | 1                | 0              | -5.383323               | 1.771834  | -2.041840 |
| 40               | 1                | 0              | -6.651202               | 3.414861  | -0.893739 |
| 41               | 6                | 0              | -8.329347               | 2.213381  | -0.265623 |
| 42               | 1                | 0              | -3.868649               | -1.138523 | 1.003080  |
| 43               | 1                | 0              | -4.592925               | -0.836942 | -1.944769 |
| 44               | 1                | 0              | -3.618173               | 0.363365  | -1.115804 |
| 45               | 8                | 0              | -5.968806               | 2.970011  | 1.708740  |
| 46               | 1                | 0              | -8.681026               | 2.932919  | 0.479092  |
| 47               | 1                | 0              | -8.890504               | 2.373018  | -1.191222 |
| 48               | 1                | 0              | -8.555408               | 1.205585  | 0.099196  |
| 49               | 1                | 0              | 1.365454                | -0.963144 | -1.651733 |
| 50               | 6                | 0              | 3.081136                | 0.101619  | -0.960488 |
| 51               | 6                | 0              | 3.478204                | 0.124862  | -2.448402 |

|    |   |   |           |           |           |
|----|---|---|-----------|-----------|-----------|
| 52 | 6 | 0 | 3.372634  | 1.483553  | -0.310253 |
| 53 | 1 | 0 | 4.543773  | 0.318367  | -2.599144 |
| 54 | 1 | 0 | 3.249956  | -0.826895 | -2.936276 |
| 55 | 1 | 0 | 2.923405  | 0.913585  | -2.969857 |
| 56 | 6 | 0 | 4.849527  | 1.936874  | -0.273743 |
| 57 | 6 | 0 | 4.963102  | 3.286671  | 0.396662  |
| 58 | 8 | 0 | 5.060495  | 3.464350  | 1.599341  |
| 59 | 8 | 0 | 4.912805  | 4.299508  | -0.493643 |
| 60 | 6 | 0 | 4.962292  | 5.637938  | 0.047879  |
| 61 | 6 | 0 | 4.882327  | -1.873149 | -0.814282 |
| 62 | 1 | 0 | 4.175936  | -0.655910 | 0.768304  |
| 63 | 6 | 0 | 4.706723  | -3.024042 | -1.481848 |
| 64 | 6 | 0 | 6.271974  | -1.291227 | -0.677279 |
| 65 | 1 | 0 | 5.550470  | -3.534134 | -1.938753 |
| 66 | 1 | 0 | 3.739974  | -3.500463 | -1.606130 |
| 67 | 1 | 0 | 7.024068  | -1.961135 | -1.102557 |
| 68 | 1 | 0 | 6.361729  | -0.324670 | -1.185299 |
| 69 | 1 | 0 | 6.523777  | -1.118814 | 0.376944  |
| 70 | 1 | 0 | 5.268218  | 2.004923  | -1.280630 |
| 71 | 1 | 0 | 5.450557  | 1.241044  | 0.315163  |
| 72 | 1 | 0 | 2.986636  | 1.475374  | 0.711242  |
| 73 | 1 | 0 | 2.803804  | 2.240482  | -0.863042 |
| 74 | 8 | 0 | 2.606644  | -3.968601 | 1.768739  |
| 75 | 1 | 0 | 3.705187  | -2.346491 | 2.231623  |
| 76 | 6 | 0 | 1.303714  | -0.569487 | 2.868590  |
| 77 | 1 | 0 | 1.201344  | 0.322112  | 3.491670  |
| 78 | 1 | 0 | 0.396832  | -1.176076 | 2.955847  |
| 79 | 1 | 0 | 2.158835  | -1.150388 | 3.236922  |
| 80 | 6 | 0 | -4.780793 | -2.744238 | -0.060588 |
| 81 | 1 | 0 | -5.794331 | -2.460406 | 0.239925  |
| 82 | 1 | 0 | -4.848847 | -3.177926 | -1.064363 |
| 83 | 1 | 0 | -4.459117 | -3.532103 | 0.625188  |
| 84 | 1 | 0 | 5.897326  | 5.791894  | 0.590670  |
| 85 | 1 | 0 | 4.905861  | 6.300779  | -0.814397 |
| 86 | 1 | 0 | 4.117708  | 5.806667  | 0.719317  |

---

| Center<br>Number | Atomic<br>Number | Atomic<br>Type | Coordinates (Angstroms) |           |           |
|------------------|------------------|----------------|-------------------------|-----------|-----------|
|                  |                  |                | X                       | Y         | Z         |
| 1                | 6                | 0              | -1.101849               | 0.052790  | -1.150619 |
| 2                | 6                | 0              | 0.278232                | 0.742912  | -1.129028 |
| 3                | 1                | 0              | -1.134469               | -0.565610 | -2.051800 |
| 4                | 1                | 0              | -1.880922               | 0.814530  | -1.266888 |
| 5                | 1                | 0              | 0.330065                | 1.501972  | -0.343452 |
| 6                | 1                | 0              | 0.425155                | 1.259159  | -2.085349 |
| 7                | 6                | 0              | 3.598337                | -1.123323 | -0.291670 |
| 8                | 6                | 0              | 2.475945                | -1.940588 | 0.404799  |
| 9                | 6                | 0              | 1.227128                | -0.998052 | 0.456965  |
| 10               | 6                | 0              | 1.361199                | -0.316169 | -0.922776 |
| 11               | 6                | 0              | 2.924954                | -2.603969 | 1.685759  |
| 12               | 1                | 0              | 2.159694                | -2.780761 | -0.228285 |
| 13               | 8                | 0              | 1.384424                | 0.045095  | 1.445114  |
| 14               | 6                | 0              | -1.978529               | -3.066339 | 0.925933  |
| 15               | 6                | 0              | -2.483532               | -1.994435 | -0.094295 |
| 16               | 6                | 0              | -1.399313               | -0.814660 | 0.108396  |
| 17               | 6                | 0              | -0.151728               | -1.622646 | 0.547338  |
| 18               | 6                | 0              | -0.496297               | -2.830989 | 1.005729  |
| 19               | 1                | 0              | -2.438833               | -2.929387 | 1.916322  |
| 20               | 1                | 0              | -2.226322               | -4.086270 | 0.610462  |
| 21               | 6                | 0              | -2.368372               | -2.622690 | -1.502446 |
| 22               | 6                | 0              | -1.798573               | 0.133120  | 1.269853  |
| 23               | 1                | 0              | 0.183922                | -3.574147 | 1.410500  |
| 24               | 1                | 0              | -2.702012               | -1.952070 | -2.298344 |
| 25               | 1                | 0              | -1.334526               | -2.907860 | -1.720531 |
| 26               | 1                | 0              | -2.975805               | -3.530787 | -1.563040 |
| 27               | 1                | 0              | -0.992663               | 0.840882  | 1.474358  |
| 28               | 1                | 0              | -2.694554               | 0.710785  | 1.026977  |
| 29               | 1                | 0              | -1.995920               | -0.419217 | 2.193788  |
| 30               | 6                | 0              | -3.971035               | -1.604236 | 0.211721  |
| 31               | 6                | 0              | -4.554850               | -0.578231 | -0.788597 |
| 32               | 6                | 0              | -5.883992               | 0.058294  | -0.377741 |
| 33               | 6                | 0              | -6.388190               | 1.152959  | -1.340323 |
| 34               | 6                | 0              | -5.877128               | 2.460739  | -0.715728 |
| 35               | 6                | 0              | -5.734199               | 2.094402  | 0.757910  |
| 36               | 8                | 0              | -5.736095               | 0.749431  | 0.909868  |
| 37               | 1                | 0              | -6.644430               | -0.704911 | -0.204126 |
| 38               | 1                | 0              | -7.483329               | 1.157026  | -1.364936 |
| 39               | 1                | 0              | -6.029213               | 0.995338  | -2.360430 |
| 40               | 1                | 0              | -4.855497               | 2.668187  | -1.064730 |
| 41               | 6                | 0              | -6.737676               | 3.703307  | -0.950284 |
| 42               | 1                | 0              | -3.978161               | -1.137142 | 1.201960  |
| 43               | 1                | 0              | -4.731919               | -1.064150 | -1.756801 |
| 44               | 1                | 0              | -3.837163               | 0.226066  | -0.976703 |
| 45               | 8                | 0              | -5.616386               | 2.842151  | 1.706737  |
| 46               | 1                | 0              | -6.332593               | 4.562444  | -0.408800 |
| 47               | 1                | 0              | -6.766216               | 3.949477  | -2.016057 |
| 48               | 1                | 0              | -7.765356               | 3.537539  | -0.609993 |
| 49               | 1                | 0              | 1.143745                | -1.121423 | -1.640443 |
| 50               | 6                | 0              | 2.869813                | 0.021534  | -1.141130 |
| 51               | 6                | 0              | 3.173252                | -0.022967 | -2.650828 |

|    |   |   |           |           |           |
|----|---|---|-----------|-----------|-----------|
| 52 | 6 | 0 | 3.203465  | 1.436505  | -0.588335 |
| 53 | 1 | 0 | 4.233442  | 0.128332  | -2.871305 |
| 54 | 1 | 0 | 2.887799  | -0.982656 | -3.089071 |
| 55 | 1 | 0 | 2.613716  | 0.766078  | -3.166559 |
| 56 | 6 | 0 | 4.674100  | 1.891981  | -0.730516 |
| 57 | 6 | 0 | 4.831842  | 3.305939  | -0.220642 |
| 58 | 8 | 0 | 4.526299  | 4.309261  | -0.844067 |
| 59 | 8 | 0 | 5.328184  | 3.344031  | 1.032920  |
| 60 | 6 | 0 | 5.470821  | 4.651143  | 1.631173  |
| 61 | 6 | 0 | 4.610051  | -1.995294 | -1.035954 |
| 62 | 1 | 0 | 4.154407  | -0.625311 | 0.508650  |
| 63 | 6 | 0 | 4.283376  | -3.105385 | -1.714067 |
| 64 | 6 | 0 | 6.049361  | -1.540215 | -0.971306 |
| 65 | 1 | 0 | 5.042010  | -3.687898 | -2.229867 |
| 66 | 1 | 0 | 3.265134  | -3.475226 | -1.793891 |
| 67 | 1 | 0 | 6.715224  | -2.242278 | -1.480615 |
| 68 | 1 | 0 | 6.180619  | -0.555785 | -1.436026 |
| 69 | 1 | 0 | 6.377780  | -1.444048 | 0.070997  |
| 70 | 1 | 0 | 4.979713  | 1.897787  | -1.780211 |
| 71 | 1 | 0 | 5.343305  | 1.234528  | -0.171635 |
| 72 | 1 | 0 | 2.921572  | 1.476264  | 0.466227  |
| 73 | 1 | 0 | 2.578252  | 2.165988  | -1.115700 |
| 74 | 8 | 0 | 4.051020  | -2.532405 | 2.147750  |
| 75 | 1 | 0 | 2.165942  | -3.226277 | 2.198855  |
| 76 | 6 | 0 | 1.260958  | -0.300921 | 2.821931  |
| 77 | 1 | 0 | 0.398488  | -0.949853 | 3.007233  |
| 78 | 1 | 0 | 2.167717  | -0.783762 | 3.203869  |
| 79 | 1 | 0 | 1.120217  | 0.638852  | 3.361400  |
| 80 | 6 | 0 | -4.897851 | -2.836244 | 0.304257  |
| 81 | 1 | 0 | -5.890560 | -2.549076 | 0.664065  |
| 82 | 1 | 0 | -5.031184 | -3.324623 | -0.667591 |
| 83 | 1 | 0 | -4.515903 | -3.582505 | 1.005315  |
| 84 | 1 | 0 | 5.878873  | 4.471020  | 2.624670  |
| 85 | 1 | 0 | 6.153692  | 5.265371  | 1.040371  |
| 86 | 1 | 0 | 4.499174  | 5.145270  | 1.697723  |

---



| Center<br>Number | Atomic<br>Number | Atomic<br>Type | Coordinates (Angstroms) |           |           |
|------------------|------------------|----------------|-------------------------|-----------|-----------|
|                  |                  |                | X                       | Y         | Z         |
| 1                | 6                | 0              | -0.704536               | 0.214745  | -1.067131 |
| 2                | 6                | 0              | 0.674642                | 0.863142  | -0.816054 |
| 3                | 1                | 0              | -0.674541               | -0.210806 | -2.074020 |
| 4                | 1                | 0              | -1.468043               | 1.000652  | -1.083238 |
| 5                | 1                | 0              | 0.672502                | 1.460974  | 0.100679  |
| 6                | 1                | 0              | 0.879939                | 1.544491  | -1.649270 |
| 7                | 6                | 0              | 3.893939                | -1.128838 | 0.045900  |
| 8                | 6                | 0              | 2.734410                | -2.130366 | 0.274749  |
| 9                | 6                | 0              | 1.491277                | -1.184454 | 0.439979  |
| 10               | 6                | 0              | 1.745933                | -0.227381 | -0.746209 |
| 11               | 6                | 0              | 3.068883                | -3.106047 | 1.380513  |
| 12               | 1                | 0              | 2.527570                | -2.731214 | -0.616233 |
| 13               | 8                | 0              | 1.590864                | -0.373671 | 1.631289  |
| 14               | 6                | 0              | -1.733690               | -3.248427 | 0.247137  |
| 15               | 6                | 0              | -2.173959               | -1.972991 | -0.544197 |
| 16               | 6                | 0              | -1.097433               | -0.881467 | -0.034052 |
| 17               | 6                | 0              | 0.110603                | -1.786878 | 0.302613  |
| 18               | 6                | 0              | -0.258970               | -3.061551 | 0.468205  |
| 19               | 1                | 0              | -2.254657               | -3.321519 | 1.214067  |
| 20               | 1                | 0              | -1.965375               | -4.171975 | -0.296046 |
| 21               | 6                | 0              | -1.983170               | -2.285317 | -2.046378 |
| 22               | 6                | 0              | -1.571152               | -0.178598 | 1.265422  |
| 23               | 1                | 0              | 0.405795                | -3.873183 | 0.744110  |
| 24               | 1                | 0              | -2.269652               | -1.453499 | -2.695146 |
| 25               | 1                | 0              | -0.940022               | -2.534015 | -2.264968 |
| 26               | 1                | 0              | -2.588667               | -3.149881 | -2.334658 |
| 27               | 1                | 0              | -0.776821               | 0.458668  | 1.659255  |
| 28               | 1                | 0              | -2.447809               | 0.450164  | 1.086271  |
| 29               | 1                | 0              | -1.830458               | -0.901609 | 2.045283  |
| 30               | 6                | 0              | -3.674197               | -1.632638 | -0.243546 |
| 31               | 6                | 0              | -4.194719               | -0.403911 | -1.028655 |
| 32               | 6                | 0              | -5.501013               | 0.192872  | -0.521877 |
| 33               | 6                | 0              | -6.031731               | 1.387193  | -1.332928 |
| 34               | 6                | 0              | -6.732882               | 2.261005  | -0.279236 |
| 35               | 6                | 0              | -6.000351               | 1.880860  | 1.004509  |
| 36               | 8                | 0              | -5.300526               | 0.736046  | 0.828409  |
| 37               | 1                | 0              | -6.272708               | -0.577255 | -0.422088 |
| 38               | 1                | 0              | -6.697510               | 1.064611  | -2.137998 |
| 39               | 1                | 0              | -5.192740               | 1.929272  | -1.783076 |
| 40               | 1                | 0              | -6.574765               | 3.329030  | -0.454640 |
| 41               | 6                | 0              | -8.245036               | 2.001138  | -0.135034 |
| 42               | 1                | 0              | -3.734940               | -1.389995 | 0.822639  |
| 43               | 1                | 0              | -4.362297               | -0.678865 | -2.078600 |
| 44               | 1                | 0              | -3.451857               | 0.398887  | -1.033916 |
| 45               | 8                | 0              | -6.010689               | 2.465343  | 2.068852  |
| 46               | 1                | 0              | -8.658706               | 2.574957  | 0.698987  |
| 47               | 1                | 0              | -8.760787               | 2.303722  | -1.051298 |
| 48               | 1                | 0              | -8.458020               | 0.941097  | 0.040226  |
| 49               | 1                | 0              | 1.588823                | -0.856426 | -1.634360 |
| 50               | 6                | 0              | 3.275237                | 0.111301  | -0.756558 |
| 51               | 6                | 0              | 3.750988                | 0.164903  | -2.221182 |

|    |   |   |           |           |           |
|----|---|---|-----------|-----------|-----------|
| 52 | 6 | 0 | 3.677683  | 1.408438  | 0.004574  |
| 53 | 1 | 0 | 4.798884  | 0.470476  | -2.308037 |
| 54 | 1 | 0 | 3.650699  | -0.811864 | -2.703211 |
| 55 | 1 | 0 | 3.149621  | 0.878359  | -2.795346 |
| 56 | 6 | 0 | 3.435715  | 2.748375  | -0.702841 |
| 57 | 6 | 0 | 3.988157  | 3.924955  | 0.075256  |
| 58 | 8 | 0 | 4.792564  | 3.866881  | 0.988503  |
| 59 | 8 | 0 | 3.490107  | 5.091271  | -0.389445 |
| 60 | 6 | 0 | 3.978793  | 6.297129  | 0.237549  |
| 61 | 6 | 0 | 5.178081  | -1.734843 | -0.502127 |
| 62 | 1 | 0 | 4.145173  | -0.736475 | 1.040515  |
| 63 | 6 | 0 | 5.228693  | -2.904727 | -1.157965 |
| 64 | 6 | 0 | 6.446359  | -0.956836 | -0.227965 |
| 65 | 1 | 0 | 6.175114  | -3.301045 | -1.516233 |
| 66 | 1 | 0 | 4.350262  | -3.507987 | -1.362154 |
| 67 | 1 | 0 | 6.582244  | -0.801691 | 0.849952  |
| 68 | 1 | 0 | 7.325419  | -1.480516 | -0.613411 |
| 69 | 1 | 0 | 6.420722  | 0.038977  | -0.684940 |
| 70 | 1 | 0 | 2.378471  | 2.944369  | -0.893247 |
| 71 | 1 | 0 | 3.928589  | 2.775942  | -1.682972 |
| 72 | 1 | 0 | 4.748822  | 1.349852  | 0.223058  |
| 73 | 1 | 0 | 3.170206  | 1.413122  | 0.973128  |
| 74 | 8 | 0 | 2.685640  | -4.263303 | 1.426243  |
| 75 | 1 | 0 | 3.742423  | -2.723141 | 2.174290  |
| 76 | 6 | 0 | 1.361130  | -0.995959 | 2.891766  |
| 77 | 1 | 0 | 0.509301  | -1.683068 | 2.863171  |
| 78 | 1 | 0 | 2.248027  | -1.538642 | 3.243440  |
| 79 | 1 | 0 | 1.148944  | -0.191363 | 3.600004  |
| 80 | 6 | 0 | -4.610083 | -2.839136 | -0.473646 |
| 81 | 1 | 0 | -5.626940 | -2.612394 | -0.138155 |
| 82 | 1 | 0 | -4.670380 | -3.115194 | -1.532259 |
| 83 | 1 | 0 | -4.284187 | -3.719577 | 0.085650  |
| 84 | 1 | 0 | 3.736804  | 6.296101  | 1.302399  |
| 85 | 1 | 0 | 5.060125  | 6.380764  | 0.108455  |
| 86 | 1 | 0 | 3.468122  | 7.114063  | -0.270408 |

---

| Center<br>Number | Atomic<br>Number | Atomic<br>Type | Coordinates (Angstroms) |           |           |
|------------------|------------------|----------------|-------------------------|-----------|-----------|
|                  |                  |                | X                       | Y         | Z         |
| 1                | 6                | 0              | 1.239352                | -0.303746 | -1.162915 |
| 2                | 6                | 0              | -0.101452               | -1.066445 | -1.104470 |
| 3                | 1                | 0              | 1.244644                | 0.261301  | -2.099188 |
| 4                | 1                | 0              | 2.059449                | -1.027383 | -1.230584 |
| 5                | 1                | 0              | -0.117242               | -1.772917 | -0.269660 |
| 6                | 1                | 0              | -0.207837               | -1.653159 | -2.025221 |
| 7                | 6                | 0              | -3.519026               | 0.654348  | -0.367202 |
| 8                | 6                | 0              | -2.434719               | 1.623500  | 0.192026  |
| 9                | 6                | 0              | -1.157164               | 0.727607  | 0.348291  |
| 10               | 6                | 0              | -1.245629               | -0.058500 | -0.977553 |
| 11               | 6                | 0              | -2.954970               | 2.377632  | 1.394112  |
| 12               | 1                | 0              | -2.157897               | 2.382486  | -0.543827 |
| 13               | 8                | 0              | -1.294874               | -0.243831 | 1.405603  |
| 14               | 6                | 0              | 1.927448                | 2.975690  | 0.727068  |
| 15               | 6                | 0              | 2.503956                | 1.870608  | -0.217874 |
| 16               | 6                | 0              | 1.477862                | 0.651508  | 0.043294  |
| 17               | 6                | 0              | 0.187219                | 1.421104  | 0.414736  |
| 18               | 6                | 0              | 0.457243                | 2.672284  | 0.802614  |
| 19               | 1                | 0              | 2.378763                | 2.923792  | 1.729875  |
| 20               | 1                | 0              | 2.129273                | 3.985850  | 0.352545  |
| 21               | 6                | 0              | 2.380535                | 2.405526  | -1.663172 |
| 22               | 6                | 0              | 1.907295                | -0.203900 | 1.264442  |
| 23               | 1                | 0              | -0.278603               | 3.391953  | 1.146269  |
| 24               | 1                | 0              | 2.754842                | 1.704179  | -2.413232 |
| 25               | 1                | 0              | 1.338275                | 2.630669  | -1.909114 |
| 26               | 1                | 0              | 2.947954                | 3.334732  | -1.771457 |
| 27               | 1                | 0              | 1.132647                | -0.935381 | 1.503518  |
| 28               | 1                | 0              | 2.832648                | -0.752325 | 1.067211  |
| 29               | 1                | 0              | 2.065572                | 0.411506  | 2.155428  |
| 30               | 6                | 0              | 4.005287                | 1.577715  | 0.130123  |
| 31               | 6                | 0              | 4.653295                | 0.517323  | -0.792057 |
| 32               | 6                | 0              | 6.018762                | -0.004922 | -0.341393 |
| 33               | 6                | 0              | 6.597053                | -1.122268 | -1.233541 |
| 34               | 6                | 0              | 6.166479                | -2.418629 | -0.530154 |
| 35               | 6                | 0              | 5.995000                | -1.972107 | 0.918205  |
| 36               | 8                | 0              | 5.910769                | -0.623098 | 0.986902  |
| 37               | 1                | 0              | 6.727857                | 0.814762  | -0.215918 |
| 38               | 1                | 0              | 7.690382                | -1.057822 | -1.255929 |
| 39               | 1                | 0              | 6.234718                | -1.051253 | -2.262090 |
| 40               | 1                | 0              | 5.161514                | -2.711129 | -0.866716 |
| 41               | 6                | 0              | 7.103894                | -3.616890 | -0.687981 |
| 42               | 1                | 0              | 4.022817                | 1.180242  | 1.150142  |
| 43               | 1                | 0              | 4.801046                | 0.940507  | -1.794073 |
| 44               | 1                | 0              | 3.986015                | -0.341227 | -0.916560 |
| 45               | 8                | 0              | 5.922776                | -2.666516 | 1.911255  |
| 46               | 1                | 0              | 6.747210                | -4.467205 | -0.100548 |
| 47               | 1                | 0              | 7.157155                | -3.921150 | -1.737722 |
| 48               | 1                | 0              | 8.116370                | -3.369331 | -0.351912 |
| 49               | 1                | 0              | -1.067589               | 0.701925  | -1.751757 |
| 50               | 6                | 0              | -2.736460               | -0.495156 | -1.168012 |
| 51               | 6                | 0              | -3.044724               | -0.513800 | -2.677573 |

|    |   |   |           |           |           |
|----|---|---|-----------|-----------|-----------|
| 52 | 6 | 0 | -2.959591 | -1.914195 | -0.565781 |
| 53 | 1 | 0 | -4.082607 | -0.779158 | -2.897223 |
| 54 | 1 | 0 | -2.858480 | 0.462034  | -3.134293 |
| 55 | 1 | 0 | -2.405366 | -1.249731 | -3.179357 |
| 56 | 6 | 0 | -4.343325 | -2.576256 | -0.693894 |
| 57 | 6 | 0 | -5.308147 | -2.332620 | 0.449489  |
| 58 | 8 | 0 | -5.033422 | -1.857338 | 1.536843  |
| 59 | 8 | 0 | -6.546646 | -2.767540 | 0.132533  |
| 60 | 6 | 0 | -7.550393 | -2.672716 | 1.166685  |
| 61 | 6 | 0 | -4.649634 | 1.371383  | -1.103716 |
| 62 | 1 | 0 | -3.974837 | 0.164786  | 0.500412  |
| 63 | 6 | 0 | -4.501622 | 2.533440  | -1.758153 |
| 64 | 6 | 0 | -6.008873 | 0.712911  | -1.038323 |
| 65 | 1 | 0 | -5.345414 | 2.998785  | -2.260716 |
| 66 | 1 | 0 | -3.557379 | 3.063643  | -1.825073 |
| 67 | 1 | 0 | -6.763809 | 1.302181  | -1.565825 |
| 68 | 1 | 0 | -5.998474 | -0.288663 | -1.482064 |
| 69 | 1 | 0 | -6.331086 | 0.594185  | 0.003592  |
| 70 | 1 | 0 | -4.210075 | -3.666709 | -0.712633 |
| 71 | 1 | 0 | -4.852540 | -2.345271 | -1.633933 |
| 72 | 1 | 0 | -2.674256 | -1.901317 | 0.487626  |
| 73 | 1 | 0 | -2.252883 | -2.580809 | -1.071490 |
| 74 | 8 | 0 | -2.671093 | 3.533547  | 1.663196  |
| 75 | 1 | 0 | -3.673390 | 1.828344  | 2.036070  |
| 76 | 6 | 0 | -1.200527 | 0.203785  | 2.753838  |
| 77 | 1 | 0 | -1.034994 | -0.688515 | 3.362315  |
| 78 | 1 | 0 | -0.367675 | 0.899070  | 2.900743  |
| 79 | 1 | 0 | -2.129952 | 0.680220  | 3.089974  |
| 80 | 6 | 0 | 4.867109  | 2.859479  | 0.146771  |
| 81 | 1 | 0 | 5.865475  | 2.651801  | 0.543658  |
| 82 | 1 | 0 | 4.994969  | 3.281243  | -0.856522 |
| 83 | 1 | 0 | 4.433446  | 3.634139  | 0.783966  |
| 84 | 1 | 0 | -7.691462 | -1.631991 | 1.465851  |
| 85 | 1 | 0 | -8.461718 | -3.069833 | 0.721812  |
| 86 | 1 | 0 | -7.256760 | -3.266003 | 2.035377  |

---

| Center<br>Number | Atomic<br>Number | Atomic<br>Type | Coordinates (Angstroms) |           |           |
|------------------|------------------|----------------|-------------------------|-----------|-----------|
|                  |                  |                | X                       | Y         | Z         |
| 1                | 6                | 0              | -0.857083               | 0.070231  | -1.175260 |
| 2                | 6                | 0              | 0.501601                | 0.800829  | -1.083405 |
| 3                | 1                | 0              | -0.862242               | -0.466929 | -2.127369 |
| 4                | 1                | 0              | -1.659742               | 0.813770  | -1.232777 |
| 5                | 1                | 0              | 0.516560                | 1.507948  | -0.249416 |
| 6                | 1                | 0              | 0.642340                | 1.383978  | -2.001455 |
| 7                | 6                | 0              | 3.853823                | -0.881540 | -0.146653 |
| 8                | 6                | 0              | 2.776368                | -1.913763 | 0.280835  |
| 9                | 6                | 0              | 1.479945                | -1.030986 | 0.380963  |
| 10               | 6                | 0              | 1.610617                | -0.242148 | -0.940416 |
| 11               | 6                | 0              | 3.217758                | -2.701616 | 1.493751  |
| 12               | 1                | 0              | 2.575866                | -2.646248 | -0.508052 |
| 13               | 8                | 0              | 1.581625                | -0.065055 | 1.447274  |
| 14               | 6                | 0              | -1.635639               | -3.254113 | 0.603961  |
| 15               | 6                | 0              | -2.169414               | -2.116401 | -0.327785 |
| 16               | 6                | 0              | -1.138664               | -0.916070 | -0.001908 |
| 17               | 6                | 0              | 0.130026                | -1.712668 | 0.392042  |
| 18               | 6                | 0              | -0.165905               | -2.970041 | 0.737871  |
| 19               | 1                | 0              | -2.120115               | -3.225540 | 1.592056  |
| 20               | 1                | 0              | -1.834798               | -4.251091 | 0.194604  |
| 21               | 6                | 0              | -2.007281               | -2.613675 | -1.782800 |
| 22               | 6                | 0              | -1.599249               | -0.087775 | 1.226688  |
| 23               | 1                | 0              | 0.550767                | -3.705851 | 1.087599  |
| 24               | 1                | 0              | -2.356822               | -1.891047 | -2.524598 |
| 25               | 1                | 0              | -0.959874               | -2.839422 | -2.005648 |
| 26               | 1                | 0              | -2.576240               | -3.536159 | -1.931964 |
| 27               | 1                | 0              | -0.830222               | 0.636806  | 1.501637  |
| 28               | 1                | 0              | -2.517076               | 0.467844  | 1.015986  |
| 29               | 1                | 0              | -1.783987               | -0.721734 | 2.099385  |
| 30               | 6                | 0              | -3.677361               | -1.817104 | -0.016685 |
| 31               | 6                | 0              | -4.285328               | -0.714114 | -0.915700 |
| 32               | 6                | 0              | -5.670121               | -0.213301 | -0.500625 |
| 33               | 6                | 0              | -6.191305               | 0.974387  | -1.335328 |
| 34               | 6                | 0              | -5.792530               | 2.209202  | -0.512518 |
| 35               | 6                | 0              | -5.702460               | 1.652607  | 0.904529  |
| 36               | 8                | 0              | -5.631390               | 0.301460  | 0.874869  |
| 37               | 1                | 0              | -6.390026               | -1.032814 | -0.476903 |
| 38               | 1                | 0              | -7.282019               | 0.922897  | -1.422642 |
| 39               | 1                | 0              | -5.772738               | 0.977409  | -2.344799 |
| 40               | 1                | 0              | -4.768956               | 2.516478  | -0.770546 |
| 41               | 6                | 0              | -6.713571               | 3.425003  | -0.627408 |
| 42               | 1                | 0              | -3.721643               | -1.457567 | 1.016412  |
| 43               | 1                | 0              | -4.389366               | -1.088217 | -1.942478 |
| 44               | 1                | 0              | -3.614881               | 0.149387  | -0.970733 |
| 45               | 8                | 0              | -5.678437               | 2.269237  | 1.949838  |
| 46               | 1                | 0              | -6.387667               | 4.222075  | 0.046272  |
| 47               | 1                | 0              | -6.704618               | 3.812918  | -1.650511 |
| 48               | 1                | 0              | -7.744957               | 3.160645  | -0.371034 |
| 49               | 1                | 0              | 1.396609                | -0.997817 | -1.709045 |
| 50               | 6                | 0              | 3.123673                | 0.116363  | -1.148668 |
| 51               | 6                | 0              | 3.474469                | -0.190213 | -2.622183 |

|    |   |   |           |           |           |
|----|---|---|-----------|-----------|-----------|
| 52 | 6 | 0 | 3.493357  | 1.612188  | -0.928971 |
| 53 | 1 | 0 | 4.516692  | 0.047849  | -2.854886 |
| 54 | 1 | 0 | 3.314184  | -1.245930 | -2.859942 |
| 55 | 1 | 0 | 2.839731  | 0.405295  | -3.288971 |
| 56 | 6 | 0 | 3.372832  | 2.224553  | 0.484907  |
| 57 | 6 | 0 | 3.781902  | 3.678778  | 0.448772  |
| 58 | 8 | 0 | 4.931825  | 4.085085  | 0.491413  |
| 59 | 8 | 0 | 2.718785  | 4.502259  | 0.330994  |
| 60 | 6 | 0 | 3.003642  | 5.915511  | 0.241430  |
| 61 | 6 | 0 | 5.177653  | -1.473564 | -0.608071 |
| 62 | 1 | 0 | 4.081085  | -0.305353 | 0.758825  |
| 63 | 6 | 0 | 5.321122  | -2.741410 | -1.023755 |
| 64 | 6 | 0 | 6.371698  | -0.548201 | -0.535106 |
| 65 | 1 | 0 | 6.292911  | -3.120377 | -1.328868 |
| 66 | 1 | 0 | 4.495287  | -3.443105 | -1.079564 |
| 67 | 1 | 0 | 7.290846  | -1.058152 | -0.835702 |
| 68 | 1 | 0 | 6.245755  | 0.327795  | -1.181687 |
| 69 | 1 | 0 | 6.507663  | -0.165510 | 0.484359  |
| 70 | 1 | 0 | 4.049115  | 1.723620  | 1.182031  |
| 71 | 1 | 0 | 2.358567  | 2.129845  | 0.868802  |
| 72 | 1 | 0 | 2.872122  | 2.203201  | -1.613348 |
| 73 | 1 | 0 | 4.526219  | 1.757874  | -1.264819 |
| 74 | 8 | 0 | 2.890189  | -3.852697 | 1.729790  |
| 75 | 1 | 0 | 3.913607  | -2.179766 | 2.181864  |
| 76 | 6 | 0 | 1.434247  | -0.519567 | 2.789214  |
| 77 | 1 | 0 | 1.232011  | 0.367479  | 3.394434  |
| 78 | 1 | 0 | 0.604091  | -1.224697 | 2.897072  |
| 79 | 1 | 0 | 2.353097  | -0.988778 | 3.163187  |
| 80 | 6 | 0 | -4.553607 | -3.088023 | -0.074513 |
| 81 | 1 | 0 | -5.558025 | -2.885301 | 0.309206  |
| 82 | 1 | 0 | -4.663194 | -3.465073 | -1.097554 |
| 83 | 1 | 0 | -4.142859 | -3.894541 | 0.537806  |
| 84 | 1 | 0 | 3.524140  | 6.254643  | 1.139576  |
| 85 | 1 | 0 | 3.617991  | 6.123474  | -0.637332 |
| 86 | 1 | 0 | 2.032751  | 6.401333  | 0.154874  |

---

| Center<br>Number | Atomic<br>Number | Atomic<br>Type | Coordinates (Angstroms) |           |           |
|------------------|------------------|----------------|-------------------------|-----------|-----------|
|                  |                  |                | X                       | Y         | Z         |
| 1                | 6                | 0              | -0.966058               | 0.219807  | -1.149856 |
| 2                | 6                | 0              | 0.431337                | 0.869941  | -1.053363 |
| 3                | 1                | 0              | -0.986690               | -0.355566 | -2.079596 |
| 4                | 1                | 0              | -1.719524               | 1.008601  | -1.253721 |
| 5                | 1                | 0              | 0.479208                | 1.590916  | -0.232106 |
| 6                | 1                | 0              | 0.622562                | 1.426269  | -1.979226 |
| 7                | 6                | 0              | 3.666009                | -1.084400 | -0.132090 |
| 8                | 6                | 0              | 2.490962                | -1.972951 | 0.385123  |
| 9                | 6                | 0              | 1.281145                | -0.975837 | 0.468404  |
| 10               | 6                | 0              | 1.479967                | -0.226837 | -0.868513 |
| 11               | 6                | 0              | 2.895775                | -2.729500 | 1.627301  |
| 12               | 1                | 0              | 2.205818                | -2.725946 | -0.355082 |
| 13               | 8                | 0              | 1.462689                | 0.001633  | 1.515203  |
| 14               | 6                | 0              | -1.981227               | -2.968213 | 0.756957  |
| 15               | 6                | 0              | -2.431417               | -1.838049 | -0.226551 |
| 16               | 6                | 0              | -1.325727               | -0.695405 | 0.058597  |
| 17               | 6                | 0              | -0.115337               | -1.557692 | 0.493555  |
| 18               | 6                | 0              | -0.496057               | -2.777305 | 0.888612  |
| 19               | 1                | 0              | -2.466289               | -2.862706 | 1.739604  |
| 20               | 1                | 0              | -2.247378               | -3.965961 | 0.389423  |
| 21               | 6                | 0              | -2.293247               | -2.402672 | -1.659214 |
| 22               | 6                | 0              | -1.737149               | 0.213406  | 1.246706  |
| 23               | 1                | 0              | 0.167002                | -3.545530 | 1.273090  |
| 24               | 1                | 0              | -2.593601               | -1.689099 | -2.430976 |
| 25               | 1                | 0              | -1.260342               | -2.700115 | -1.864604 |
| 26               | 1                | 0              | -2.917036               | -3.293829 | -1.776790 |
| 27               | 1                | 0              | -0.917640               | 0.886634  | 1.507099  |
| 28               | 1                | 0              | -2.607454               | 0.828026  | 1.000198  |
| 29               | 1                | 0              | -1.979952               | -0.371283 | 2.139592  |
| 30               | 6                | 0              | -3.916486               | -1.424460 | 0.056377  |
| 31               | 6                | 0              | -4.446914               | -0.342021 | -0.914415 |
| 32               | 6                | 0              | -5.723108               | 0.364987  | -0.477452 |
| 33               | 6                | 0              | -6.266801               | 1.400191  | -1.477005 |
| 34               | 6                | 0              | -6.903504               | 2.475645  | -0.580782 |
| 35               | 6                | 0              | -6.129474               | 2.319206  | 0.725198  |
| 36               | 8                | 0              | -5.460361               | 1.142950  | 0.740743  |
| 37               | 1                | 0              | -6.501839               | -0.355988 | -0.208253 |
| 38               | 1                | 0              | -6.973807               | 0.949596  | -2.178813 |
| 39               | 1                | 0              | -5.438678               | 1.824584  | -2.055264 |
| 40               | 1                | 0              | -6.727369               | 3.487013  | -0.958365 |
| 41               | 6                | 0              | -8.414033               | 2.294053  | -0.336038 |
| 42               | 1                | 0              | -3.939962               | -1.001418 | 1.066170  |
| 43               | 1                | 0              | -4.657848               | -0.793380 | -1.893120 |
| 44               | 1                | 0              | -3.693189               | 0.431211  | -1.088047 |
| 45               | 8                | 0              | -6.087724               | 3.089483  | 1.662894  |
| 46               | 1                | 0              | -8.779094               | 3.026292  | 0.389597  |
| 47               | 1                | 0              | -8.960249               | 2.435423  | -1.273463 |
| 48               | 1                | 0              | -8.643993               | 1.292580  | 0.043440  |
| 49               | 1                | 0              | 1.261795                | -0.986537 | -1.633079 |
| 50               | 6                | 0              | 3.003846                | 0.076273  | -1.015066 |
| 51               | 6                | 0              | 3.391948                | 0.047761  | -2.507684 |

|    |   |   |           |           |           |
|----|---|---|-----------|-----------|-----------|
| 52 | 6 | 0 | 3.357938  | 1.474132  | -0.433215 |
| 53 | 1 | 0 | 4.475959  | 0.042065  | -2.652009 |
| 54 | 1 | 0 | 2.985877  | -0.827678 | -3.021490 |
| 55 | 1 | 0 | 2.992330  | 0.934134  | -3.014150 |
| 56 | 6 | 0 | 4.831505  | 1.883516  | -0.543957 |
| 57 | 6 | 0 | 5.104043  | 3.260321  | 0.023921  |
| 58 | 8 | 0 | 4.267436  | 4.109317  | 0.276068  |
| 59 | 8 | 0 | 6.427965  | 3.459857  | 0.205022  |
| 60 | 6 | 0 | 6.822591  | 4.758655  | 0.697981  |
| 61 | 6 | 0 | 4.800324  | -1.905897 | -0.737114 |
| 62 | 1 | 0 | 4.084796  | -0.587443 | 0.750053  |
| 63 | 6 | 0 | 6.070344  | -1.696051 | -0.356531 |
| 64 | 6 | 0 | 4.474062  | -3.014507 | -1.715979 |
| 65 | 1 | 0 | 6.890752  | -2.276111 | -0.771141 |
| 66 | 1 | 0 | 6.332784  | -0.945858 | 0.384748  |
| 67 | 1 | 0 | 5.382357  | -3.385326 | -2.198531 |
| 68 | 1 | 0 | 4.003958  | -3.863358 | -1.204009 |
| 69 | 1 | 0 | 3.779216  | -2.694320 | -2.497154 |
| 70 | 1 | 0 | 5.163976  | 1.913226  | -1.589290 |
| 71 | 1 | 0 | 5.499047  | 1.177232  | -0.042626 |
| 72 | 1 | 0 | 3.052312  | 1.510477  | 0.614808  |
| 73 | 1 | 0 | 2.758220  | 2.227156  | -0.955249 |
| 74 | 8 | 0 | 2.577096  | -3.882266 | 1.870095  |
| 75 | 1 | 0 | 3.564173  | -2.188695 | 2.327229  |
| 76 | 6 | 0 | 1.232895  | -0.392686 | 2.864817  |
| 77 | 1 | 0 | 1.110793  | 0.530209  | 3.436941  |
| 78 | 1 | 0 | 0.329934  | -1.001924 | 2.969303  |
| 79 | 1 | 0 | 2.085647  | -0.944802 | 3.279575  |
| 80 | 6 | 0 | -4.874464 | -2.635798 | 0.067683  |
| 81 | 1 | 0 | -5.879440 | -2.334129 | 0.378984  |
| 82 | 1 | 0 | -4.965154 | -3.096665 | -0.922183 |
| 83 | 1 | 0 | -4.547744 | -3.407652 | 0.769063  |
| 84 | 1 | 0 | 7.908670  | 4.722255  | 0.771026  |
| 85 | 1 | 0 | 6.510358  | 5.540105  | 0.001724  |
| 86 | 1 | 0 | 6.377797  | 4.943866  | 1.678034  |

---



| Center<br>Number | Atomic<br>Number | Atomic<br>Type | Coordinates (Angstroms) |           |           |
|------------------|------------------|----------------|-------------------------|-----------|-----------|
|                  |                  |                | X                       | Y         | Z         |
| 1                | 6                | 0              | -0.897902               | 0.202554  | -1.136628 |
| 2                | 6                | 0              | 0.487495                | 0.873648  | -1.014341 |
| 3                | 1                | 0              | -0.903076               | -0.349032 | -2.080755 |
| 4                | 1                | 0              | -1.664019               | 0.980957  | -1.224972 |
| 5                | 1                | 0              | 0.516592                | 1.572572  | -0.173267 |
| 6                | 1                | 0              | 0.674305                | 1.457801  | -1.923872 |
| 7                | 6                | 0              | 3.750322                | -1.053489 | -0.127155 |
| 8                | 6                | 0              | 2.586264                | -1.972103 | 0.361563  |
| 9                | 6                | 0              | 1.359813                | -0.997435 | 0.463193  |
| 10               | 6                | 0              | 1.554373                | -0.209162 | -0.851683 |
| 11               | 6                | 0              | 2.997246                | -2.754698 | 1.585926  |
| 12               | 1                | 0              | 2.317059                | -2.710030 | -0.399495 |
| 13               | 8                | 0              | 1.518767                | -0.044192 | 1.535520  |
| 14               | 6                | 0              | -1.870263               | -3.050621 | 0.679151  |
| 15               | 6                | 0              | -2.334615               | -1.901731 | -0.275657 |
| 16               | 6                | 0              | -1.248942               | -0.749311 | 0.045459  |
| 17               | 6                | 0              | -0.026987               | -1.602685 | 0.464254  |
| 18               | 6                | 0              | -0.389205               | -2.838664 | 0.824136  |
| 19               | 1                | 0              | -2.361766               | -2.980169 | 1.661745  |
| 20               | 1                | 0              | -2.117851               | -4.042382 | 0.283504  |
| 21               | 6                | 0              | -2.181533               | -2.424736 | -1.722521 |
| 22               | 6                | 0              | -1.682360               | 0.121718  | 1.253868  |
| 23               | 1                | 0              | 0.285023                | -3.605572 | 1.191520  |
| 24               | 1                | 0              | -2.488174               | -1.694338 | -2.475857 |
| 25               | 1                | 0              | -1.143738               | -2.702580 | -1.930736 |
| 26               | 1                | 0              | -2.792286               | -3.320740 | -1.867724 |
| 27               | 1                | 0              | -0.874382               | 0.799013  | 1.538297  |
| 28               | 1                | 0              | -2.559678               | 0.730018  | 1.016721  |
| 29               | 1                | 0              | -1.922932               | -0.489525 | 2.129406  |
| 30               | 6                | 0              | -3.827670               | -1.520101 | 0.010676  |
| 31               | 6                | 0              | -4.373422               | -0.424699 | -0.937320 |
| 32               | 6                | 0              | -5.648781               | 0.268022  | -0.475548 |
| 33               | 6                | 0              | -6.219808               | 1.301950  | -1.461080 |
| 34               | 6                | 0              | -6.849095               | 2.368992  | -0.549717 |
| 35               | 6                | 0              | -6.049674               | 2.215000  | 0.741112  |
| 36               | 8                | 0              | -5.371602               | 1.043849  | 0.740949  |
| 37               | 1                | 0              | -6.415459               | -0.461454 | -0.194971 |
| 38               | 1                | 0              | -6.935559               | 0.847523  | -2.151462 |
| 39               | 1                | 0              | -5.406100               | 1.735454  | -2.052945 |
| 40               | 1                | 0              | -6.688384               | 3.383019  | -0.927105 |
| 41               | 6                | 0              | -8.353361               | 2.174508  | -0.277660 |
| 42               | 1                | 0              | -3.862996               | -1.122059 | 1.030180  |
| 43               | 1                | 0              | -4.591422               | -0.862211 | -1.920751 |
| 44               | 1                | 0              | -3.626304               | 0.355951  | -1.106627 |
| 45               | 8                | 0              | -5.995691               | 2.983406  | 1.679763  |
| 46               | 1                | 0              | -8.710362               | 2.901318  | 0.457388  |
| 47               | 1                | 0              | -8.918038               | 2.315251  | -1.204176 |
| 48               | 1                | 0              | -8.568785               | 1.169982  | 0.102267  |
| 49               | 1                | 0              | 1.356196                | -0.950636 | -1.639230 |
| 50               | 6                | 0              | 3.074342                | 0.123455  | -0.976722 |
| 51               | 6                | 0              | 3.476906                | 0.155556  | -2.464628 |

|    |   |   |           |           |           |
|----|---|---|-----------|-----------|-----------|
| 52 | 6 | 0 | 3.397988  | 1.505037  | -0.340270 |
| 53 | 1 | 0 | 4.562242  | 0.175975  | -2.596553 |
| 54 | 1 | 0 | 3.093056  | -0.709459 | -3.011812 |
| 55 | 1 | 0 | 3.065802  | 1.051300  | -2.944647 |
| 56 | 6 | 0 | 4.873580  | 1.958029  | -0.443105 |
| 57 | 6 | 0 | 5.076362  | 3.253994  | 0.306361  |
| 58 | 8 | 0 | 5.353387  | 3.342975  | 1.490989  |
| 59 | 8 | 0 | 4.880888  | 4.330914  | -0.483666 |
| 60 | 6 | 0 | 4.996754  | 5.624460  | 0.148489  |
| 61 | 6 | 0 | 4.894469  | -1.842972 | -0.756372 |
| 62 | 1 | 0 | 4.163684  | -0.577328 | 0.768777  |
| 63 | 6 | 0 | 6.161887  | -1.628608 | -0.369901 |
| 64 | 6 | 0 | 4.580764  | -2.928091 | -1.765378 |
| 65 | 1 | 0 | 6.988717  | -2.187430 | -0.800667 |
| 66 | 1 | 0 | 6.415553  | -0.897219 | 0.392855  |
| 67 | 1 | 0 | 5.493001  | -3.273767 | -2.258998 |
| 68 | 1 | 0 | 4.122401  | -3.796738 | -1.276425 |
| 69 | 1 | 0 | 3.880548  | -2.596072 | -2.536860 |
| 70 | 1 | 0 | 5.166214  | 2.100225  | -1.486004 |
| 71 | 1 | 0 | 5.538384  | 1.218720  | 0.008108  |
| 72 | 1 | 0 | 3.103107  | 1.485879  | 0.711321  |
| 73 | 1 | 0 | 2.779359  | 2.263796  | -0.833611 |
| 74 | 8 | 0 | 2.690529  | -3.916575 | 1.798648  |
| 75 | 1 | 0 | 3.658406  | -2.224158 | 2.300245  |
| 76 | 6 | 0 | 1.290814  | -0.477287 | 2.873718  |
| 77 | 1 | 0 | 0.388738  | -1.090546 | 2.961117  |
| 78 | 1 | 0 | 2.144686  | -1.039002 | 3.272475  |
| 79 | 1 | 0 | 1.167989  | 0.429145  | 3.471276  |
| 80 | 6 | 0 | -4.765196 | -2.747163 | -0.012200 |
| 81 | 1 | 0 | -5.779927 | -2.466943 | 0.287636  |
| 82 | 1 | 0 | -4.832768 | -3.192831 | -1.010742 |
| 83 | 1 | 0 | -4.436649 | -3.524882 | 0.681850  |
| 84 | 1 | 0 | 4.801723  | 6.350161  | -0.639837 |
| 85 | 1 | 0 | 4.262554  | 5.721046  | 0.951174  |
| 86 | 1 | 0 | 6.001671  | 5.758778  | 0.554494  |

---

| Center<br>Number | Atomic<br>Number | Atomic<br>Type | Coordinates (Angstroms) |           |           |
|------------------|------------------|----------------|-------------------------|-----------|-----------|
|                  |                  |                | X                       | Y         | Z         |
| 1                | 6                | 0              | -0.758710               | 0.107201  | -1.185526 |
| 2                | 6                | 0              | 0.609796                | 0.820327  | -1.102994 |
| 3                | 1                | 0              | -0.769357               | -0.445796 | -2.128550 |
| 4                | 1                | 0              | -1.549538               | 0.862034  | -1.256763 |
| 5                | 1                | 0              | 0.632272                | 1.542904  | -0.282529 |
| 6                | 1                | 0              | 0.761134                | 1.384154  | -2.031411 |
| 7                | 6                | 0              | 3.936014                | -0.888992 | -0.125709 |
| 8                | 6                | 0              | 2.843462                | -1.898242 | 0.318328  |
| 9                | 6                | 0              | 1.558894                | -0.995993 | 0.398243  |
| 10               | 6                | 0              | 1.703774                | -0.234607 | -0.937503 |
| 11               | 6                | 0              | 3.270883                | -2.668879 | 1.547042  |
| 12               | 1                | 0              | 2.635046                | -2.642451 | -0.457342 |
| 13               | 8                | 0              | 1.671624                | -0.011435 | 1.446037  |
| 14               | 6                | 0              | -1.584791               | -3.175293 | 0.651966  |
| 15               | 6                | 0              | -2.101201               | -2.049029 | -0.302367 |
| 16               | 6                | 0              | -1.057478               | -0.854126 | 0.004886  |
| 17               | 6                | 0              | 0.199772                | -1.659149 | 0.418275  |
| 18               | 6                | 0              | -0.112036               | -2.906708 | 0.785247  |
| 19               | 1                | 0              | -2.071278               | -3.121187 | 1.638110  |
| 20               | 1                | 0              | -1.796646               | -4.177165 | 0.261096  |
| 21               | 6                | 0              | -1.940939               | -2.571600 | -1.748651 |
| 22               | 6                | 0              | -1.515142               | 0.004653  | 1.213321  |
| 23               | 1                | 0              | 0.594707                | -3.644563 | 1.150473  |
| 24               | 1                | 0              | -2.286879               | -1.858644 | -2.501585 |
| 25               | 1                | 0              | -0.894441               | -2.805549 | -1.967026 |
| 26               | 1                | 0              | -2.513812               | -3.493762 | -1.883992 |
| 27               | 1                | 0              | -0.738714               | 0.725755  | 1.477078  |
| 28               | 1                | 0              | -2.426528               | 0.564352  | 0.985980  |
| 29               | 1                | 0              | -1.709210               | -0.609865 | 2.098124  |
| 30               | 6                | 0              | -3.605853               | -1.725475 | -0.003736 |
| 31               | 6                | 0              | -4.201391               | -0.648653 | -0.943304 |
| 32               | 6                | 0              | -5.503520               | -0.014081 | -0.472929 |
| 33               | 6                | 0              | -6.120805               | 1.003512  | -1.447429 |
| 34               | 6                | 0              | -6.791889               | 2.034776  | -0.524692 |
| 35               | 6                | 0              | -5.984477               | 1.902121  | 0.763469  |
| 36               | 8                | 0              | -5.256482               | 0.761653  | 0.750404  |
| 37               | 1                | 0              | -6.238332               | -0.777435 | -0.197610 |
| 38               | 1                | 0              | -6.819128               | 0.525362  | -2.139574 |
| 39               | 1                | 0              | -5.328384               | 1.476186  | -2.038204 |
| 40               | 1                | 0              | -6.673686               | 3.058151  | -0.892553 |
| 41               | 6                | 0              | -8.286487               | 1.776473  | -0.252313 |
| 42               | 1                | 0              | -3.648335               | -1.332455 | 1.017468  |
| 43               | 1                | 0              | -4.404405               | -1.089360 | -1.928510 |
| 44               | 1                | 0              | -3.488721               | 0.164031  | -1.110241 |
| 45               | 8                | 0              | -5.962283               | 2.662689  | 1.709856  |
| 46               | 1                | 0              | -8.671191               | 2.480910  | 0.490480  |
| 47               | 1                | 0              | -8.858189               | 1.903221  | -1.176528 |
| 48               | 1                | 0              | -8.460484               | 0.760477  | 0.118199  |
| 49               | 1                | 0              | 1.481218                | -1.001720 | -1.692238 |
| 50               | 6                | 0              | 3.222085                | 0.099709  | -1.148318 |
| 51               | 6                | 0              | 3.571182                | -0.239474 | -2.615197 |

|    |   |   |           |           |           |
|----|---|---|-----------|-----------|-----------|
| 52 | 6 | 0 | 3.610036  | 1.594589  | -0.956228 |
| 53 | 1 | 0 | 4.616886  | -0.020459 | -2.850960 |
| 54 | 1 | 0 | 3.396270  | -1.297171 | -2.833105 |
| 55 | 1 | 0 | 2.945699  | 0.352244  | -3.294044 |
| 56 | 6 | 0 | 3.500886  | 2.233984  | 0.446489  |
| 57 | 6 | 0 | 3.927985  | 3.682213  | 0.383318  |
| 58 | 8 | 0 | 5.083616  | 4.074049  | 0.402582  |
| 59 | 8 | 0 | 2.873762  | 4.517633  | 0.271219  |
| 60 | 6 | 0 | 3.174537  | 5.925925  | 0.159335  |
| 61 | 6 | 0 | 5.252519  | -1.508070 | -0.572215 |
| 62 | 1 | 0 | 4.169014  | -0.299437 | 0.769664  |
| 63 | 6 | 0 | 5.380337  | -2.786487 | -0.959736 |
| 64 | 6 | 0 | 6.458484  | -0.596989 | -0.517382 |
| 65 | 1 | 0 | 6.347698  | -3.184242 | -1.254820 |
| 66 | 1 | 0 | 4.545867  | -3.478904 | -1.001073 |
| 67 | 1 | 0 | 7.371040  | -1.124768 | -0.807104 |
| 68 | 1 | 0 | 6.344028  | 0.267397  | -1.181400 |
| 69 | 1 | 0 | 6.599045  | -0.195696 | 0.494278  |
| 70 | 1 | 0 | 4.173599  | 1.737629  | 1.150480  |
| 71 | 1 | 0 | 2.486953  | 2.159534  | 0.835759  |
| 72 | 1 | 0 | 2.994008  | 2.180351  | -1.649750 |
| 73 | 1 | 0 | 4.643661  | 1.722230  | -1.296980 |
| 74 | 8 | 0 | 2.928087  | -3.811219 | 1.803393  |
| 75 | 1 | 0 | 3.971027  | -2.143123 | 2.227795  |
| 76 | 6 | 0 | 1.510938  | -0.437204 | 2.795664  |
| 77 | 1 | 0 | 0.667375  | -1.124553 | 2.913635  |
| 78 | 1 | 0 | 2.419509  | -0.916009 | 3.182481  |
| 79 | 1 | 0 | 1.322878  | 0.464961  | 3.382856  |
| 80 | 6 | 0 | -4.495681 | -2.987718 | -0.024106 |
| 81 | 1 | 0 | -5.516409 | -2.749056 | 0.290997  |
| 82 | 1 | 0 | -4.558872 | -3.427773 | -1.025397 |
| 83 | 1 | 0 | -4.129160 | -3.757595 | 0.659592  |
| 84 | 1 | 0 | 2.208501  | 6.422503  | 0.079891  |
| 85 | 1 | 0 | 3.711496  | 6.270065  | 1.045830  |
| 86 | 1 | 0 | 3.779083  | 6.115057  | -0.730389 |

---

| Center<br>Number | Atomic<br>Number | Atomic<br>Type | Coordinates (Angstroms) |           |           |
|------------------|------------------|----------------|-------------------------|-----------|-----------|
|                  |                  |                | X                       | Y         | Z         |
| 1                | 6                | 0              | -1.027483               | 0.161270  | -1.106431 |
| 2                | 6                | 0              | 0.352304                | 0.842668  | -0.978691 |
| 3                | 1                | 0              | -1.035573               | -0.366711 | -2.063834 |
| 4                | 1                | 0              | -1.802338               | 0.933553  | -1.169216 |
| 5                | 1                | 0              | 0.381554                | 1.519496  | -0.119793 |
| 6                | 1                | 0              | 0.525541                | 1.451836  | -1.874306 |
| 7                | 6                | 0              | 3.640996                | -1.073921 | -0.166862 |
| 8                | 6                | 0              | 2.489964                | -2.015606 | 0.308361  |
| 9                | 6                | 0              | 1.254663                | -1.056622 | 0.443415  |
| 10               | 6                | 0              | 1.431052                | -0.233479 | -0.852552 |
| 11               | 6                | 0              | 2.918689                | -2.824888 | 1.509123  |
| 12               | 1                | 0              | 2.221696                | -2.736669 | -0.468950 |
| 13               | 8                | 0              | 1.411720                | -0.128829 | 1.538130  |
| 14               | 6                | 0              | -1.953492               | -3.147579 | 0.628885  |
| 15               | 6                | 0              | -2.438629               | -1.976073 | -0.287702 |
| 16               | 6                | 0              | -1.359275               | -0.823468 | 0.053775  |
| 17               | 6                | 0              | -0.125996               | -1.675951 | 0.439077  |
| 18               | 6                | 0              | -0.473490               | -2.924805 | 0.767364  |
| 19               | 1                | 0              | -2.436905               | -3.112156 | 1.617259  |
| 20               | 1                | 0              | -2.193824               | -4.129871 | 0.206065  |
| 21               | 6                | 0              | -2.297624               | -2.458208 | -1.749841 |
| 22               | 6                | 0              | -1.788093               | 0.011408  | 1.288858  |
| 23               | 1                | 0              | 0.211430                | -3.694791 | 1.107691  |
| 24               | 1                | 0              | -2.613114               | -1.708333 | -2.479934 |
| 25               | 1                | 0              | -1.261233               | -2.727837 | -1.975451 |
| 26               | 1                | 0              | -2.907930               | -3.351367 | -1.913288 |
| 27               | 1                | 0              | -0.983826               | 0.688357  | 1.583750  |
| 28               | 1                | 0              | -2.672143               | 0.619014  | 1.076224  |
| 29               | 1                | 0              | -2.017150               | -0.623854 | 2.150058  |
| 30               | 6                | 0              | -3.931926               | -1.615675 | 0.026252  |
| 31               | 6                | 0              | -4.496584               | -0.495071 | -0.880010 |
| 32               | 6                | 0              | -5.806317               | 0.137665  | -0.405785 |
| 33               | 6                | 0              | -6.303271               | 1.303314  | -1.285210 |
| 34               | 6                | 0              | -5.752904               | 2.555904  | -0.586042 |
| 35               | 6                | 0              | -5.598472               | 2.091557  | 0.858431  |
| 36               | 8                | 0              | -5.624977               | 0.739685  | 0.922166  |
| 37               | 1                | 0              | -6.579231               | -0.620624 | -0.269271 |
| 38               | 1                | 0              | -7.398386               | 1.331529  | -1.289081 |
| 39               | 1                | 0              | -5.965372               | 1.205956  | -2.319860 |
| 40               | 1                | 0              | -4.731399               | 2.761630  | -0.936741 |
| 41               | 6                | 0              | -6.586065               | 3.830691  | -0.727363 |
| 42               | 1                | 0              | -3.959753               | -1.250090 | 1.057713  |
| 43               | 1                | 0              | -4.691805               | -0.895702 | -1.883291 |
| 44               | 1                | 0              | -3.761058               | 0.304963  | -1.008440 |
| 45               | 8                | 0              | -5.453685               | 2.773560  | 1.852052  |
| 46               | 1                | 0              | -6.152189               | 4.643601  | -0.138874 |
| 47               | 1                | 0              | -6.624161               | 4.145363  | -1.774687 |
| 48               | 1                | 0              | -7.612376               | 3.667915  | -0.381697 |
| 49               | 1                | 0              | 1.233887                | -0.956604 | -1.657223 |
| 50               | 6                | 0              | 2.946723                | 0.117561  | -0.980833 |
| 51               | 6                | 0              | 3.336905                | 0.190440  | -2.470582 |

|    |   |   |           |           |           |
|----|---|---|-----------|-----------|-----------|
| 52 | 6 | 0 | 3.260915  | 1.485570  | -0.311631 |
| 53 | 1 | 0 | 4.420812  | 0.225068  | -2.611254 |
| 54 | 1 | 0 | 2.956946  | -0.664979 | -3.035254 |
| 55 | 1 | 0 | 2.913161  | 1.093428  | -2.925432 |
| 56 | 6 | 0 | 4.730691  | 1.957057  | -0.413044 |
| 57 | 6 | 0 | 4.924696  | 3.236747  | 0.366154  |
| 58 | 8 | 0 | 5.215963  | 3.300211  | 1.548975  |
| 59 | 8 | 0 | 4.703463  | 4.330000  | -0.394153 |
| 60 | 6 | 0 | 4.809461  | 5.609127  | 0.268365  |
| 61 | 6 | 0 | 4.786552  | -1.836697 | -0.825936 |
| 62 | 1 | 0 | 4.058505  | -0.616335 | 0.736868  |
| 63 | 6 | 0 | 6.055887  | -1.616980 | -0.448905 |
| 64 | 6 | 0 | 4.473533  | -2.903525 | -1.854584 |
| 65 | 1 | 0 | 6.883650  | -2.157465 | -0.900749 |
| 66 | 1 | 0 | 6.310456  | -0.899617 | 0.326733  |
| 67 | 1 | 0 | 5.384718  | -3.231542 | -2.361980 |
| 68 | 1 | 0 | 4.025979  | -3.785672 | -1.379983 |
| 69 | 1 | 0 | 3.764674  | -2.562264 | -2.614156 |
| 70 | 1 | 0 | 5.014411  | 2.127568  | -1.454178 |
| 71 | 1 | 0 | 5.406620  | 1.214610  | 0.015809  |
| 72 | 1 | 0 | 2.973783  | 1.435913  | 0.741131  |
| 73 | 1 | 0 | 2.630657  | 2.250134  | -0.780658 |
| 74 | 8 | 0 | 2.623365  | -3.994195 | 1.695421  |
| 75 | 1 | 0 | 3.582361  | -2.306914 | 2.230354  |
| 76 | 6 | 0 | 1.200348  | -0.598445 | 2.866808  |
| 77 | 1 | 0 | 0.304019  | -1.221078 | 2.947059  |
| 78 | 1 | 0 | 2.062480  | -1.163343 | 3.242537  |
| 79 | 1 | 0 | 1.076244  | 0.291183  | 3.488830  |
| 80 | 6 | 0 | -4.860470 | -2.848837 | -0.024764 |
| 81 | 1 | 0 | -5.867019 | -2.592291 | 0.319916  |
| 82 | 1 | 0 | -4.955256 | -3.249551 | -1.040115 |
| 83 | 1 | 0 | -4.504265 | -3.654247 | 0.622345  |
| 84 | 1 | 0 | 4.596450  | 6.351260  | -0.499752 |
| 85 | 1 | 0 | 4.082843  | 5.676482  | 1.080907  |
| 86 | 1 | 0 | 5.816917  | 5.746724  | 0.666862  |

---

| Center<br>Number | Atomic<br>Number | Atomic<br>Type | Coordinates (Angstroms) |           |           |
|------------------|------------------|----------------|-------------------------|-----------|-----------|
|                  |                  |                | X                       | Y         | Z         |
| 1                | 6                | 0              | -0.941090               | 0.163596  | -1.182302 |
| 2                | 6                | 0              | 0.446077                | 0.840901  | -1.145425 |
| 3                | 1                | 0              | -0.967593               | -0.457934 | -2.081639 |
| 4                | 1                | 0              | -1.710302               | 0.933133  | -1.311750 |
| 5                | 1                | 0              | 0.496138                | 1.601684  | -0.361224 |
| 6                | 1                | 0              | 0.610347                | 1.352954  | -2.101383 |
| 7                | 6                | 0              | 3.730798                | -1.014672 | -0.191099 |
| 8                | 6                | 0              | 2.580225                | -1.887070 | 0.402495  |
| 9                | 6                | 0              | 1.355343                | -0.906633 | 0.454791  |
| 10               | 6                | 0              | 1.515677                | -0.228852 | -0.924401 |
| 11               | 6                | 0              | 3.022326                | -2.567394 | 1.676073  |
| 12               | 1                | 0              | 2.290147                | -2.685149 | -0.286855 |
| 13               | 8                | 0              | 1.536493                | 0.130355  | 1.443224  |
| 14               | 6                | 0              | -1.862603               | -2.941639 | 0.900906  |
| 15               | 6                | 0              | -2.350213               | -1.872435 | -0.131253 |
| 16               | 6                | 0              | -1.263223               | -0.695644 | 0.077145  |
| 17               | 6                | 0              | -0.029442               | -1.510799 | 0.536246  |
| 18               | 6                | 0              | -0.380000               | -2.715624 | 0.999051  |
| 19               | 1                | 0              | -2.334906               | -2.797059 | 1.884676  |
| 20               | 1                | 0              | -2.113511               | -3.961662 | 0.587845  |
| 21               | 6                | 0              | -2.220604               | -2.506919 | -1.535378 |
| 22               | 6                | 0              | -1.675007               | 0.264228  | 1.224284  |
| 23               | 1                | 0              | 0.303705                | -3.450743 | 1.411125  |
| 24               | 1                | 0              | -2.544654               | -1.838737 | -2.337499 |
| 25               | 1                | 0              | -1.184682               | -2.794195 | -1.740183 |
| 26               | 1                | 0              | -2.827826               | -3.414872 | -1.599457 |
| 27               | 1                | 0              | -0.867975               | 0.969522  | 1.434993  |
| 28               | 1                | 0              | -2.564431               | 0.844186  | 0.962704  |
| 29               | 1                | 0              | -1.887787               | -0.279523 | 2.150065  |
| 30               | 6                | 0              | -3.839301               | -1.473951 | 0.153002  |
| 31               | 6                | 0              | -4.405666               | -0.456236 | -0.866087 |
| 32               | 6                | 0              | -5.697360               | 0.237644  | -0.455038 |
| 33               | 6                | 0              | -6.272763               | 1.210230  | -1.498599 |
| 34               | 6                | 0              | -6.934821               | 2.308065  | -0.649221 |
| 35               | 6                | 0              | -6.149066               | 2.234858  | 0.657044  |
| 36               | 8                | 0              | -5.448585               | 1.078809  | 0.723709  |
| 37               | 1                | 0              | -6.456074               | -0.489359 | -0.147861 |
| 38               | 1                | 0              | -6.970421               | 0.708965  | -2.174851 |
| 39               | 1                | 0              | -5.459055               | 1.629722  | -2.100397 |
| 40               | 1                | 0              | -6.790062               | 3.305273  | -1.074818 |
| 41               | 6                | 0              | -8.437985               | 2.094972  | -0.385471 |
| 42               | 1                | 0              | -3.856613               | -0.996485 | 1.138480  |
| 43               | 1                | 0              | -4.610613               | -0.961093 | -1.819522 |
| 44               | 1                | 0              | -3.673413               | 0.326746  | -1.082666 |
| 45               | 8                | 0              | -6.122249               | 3.050056  | 1.556577  |
| 46               | 1                | 0              | -8.819271               | 2.848009  | 0.309867  |
| 47               | 1                | 0              | -8.993587               | 2.179166  | -1.324225 |
| 48               | 1                | 0              | -8.637021               | 1.105233  | 0.039448  |
| 49               | 1                | 0              | 1.294660                | -1.031362 | -1.642814 |
| 50               | 6                | 0              | 3.031644                | 0.086274  | -1.120008 |
| 51               | 6                | 0              | 3.389086                | -0.012796 | -2.616512 |

|    |   |   |           |           |           |
|----|---|---|-----------|-----------|-----------|
| 52 | 6 | 0 | 3.375574  | 1.517375  | -0.617952 |
| 53 | 1 | 0 | 4.469685  | -0.009627 | -2.783677 |
| 54 | 1 | 0 | 2.986157  | -0.919946 | -3.074433 |
| 55 | 1 | 0 | 2.965438  | 0.840102  | -3.159408 |
| 56 | 6 | 0 | 4.848323  | 1.951438  | -0.803275 |
| 57 | 6 | 0 | 5.047783  | 3.353730  | -0.277659 |
| 58 | 8 | 0 | 4.748182  | 4.373014  | -0.877314 |
| 59 | 8 | 0 | 5.574162  | 3.362003  | 0.964975  |
| 60 | 6 | 0 | 5.756776  | 4.656614  | 1.579481  |
| 61 | 6 | 0 | 4.861217  | -1.854742 | -0.778071 |
| 62 | 1 | 0 | 4.165566  | -0.464578 | 0.650703  |
| 63 | 6 | 0 | 6.136355  | -1.608126 | -0.438756 |
| 64 | 6 | 0 | 4.528852  | -3.019054 | -1.687613 |
| 65 | 1 | 0 | 6.955283  | -2.199617 | -0.839879 |
| 66 | 1 | 0 | 6.404246  | -0.814804 | 0.254039  |
| 67 | 1 | 0 | 5.431702  | -3.404385 | -2.168970 |
| 68 | 1 | 0 | 4.081457  | -3.844733 | -1.120404 |
| 69 | 1 | 0 | 3.813341  | -2.751241 | -2.469847 |
| 70 | 1 | 0 | 5.114595  | 1.965146  | -1.863166 |
| 71 | 1 | 0 | 5.526436  | 1.272334  | -0.283444 |
| 72 | 1 | 0 | 3.106228  | 1.594062  | 0.438545  |
| 73 | 1 | 0 | 2.748291  | 2.233311  | -1.160881 |
| 74 | 8 | 0 | 2.723991  | -3.708389 | 1.989568  |
| 75 | 1 | 0 | 3.698473  | -1.980717 | 2.329997  |
| 76 | 6 | 0 | 1.346959  | -0.197092 | 2.816884  |
| 77 | 1 | 0 | 1.203115  | 0.750541  | 3.341609  |
| 78 | 1 | 0 | 0.468353  | -0.830485 | 2.972987  |
| 79 | 1 | 0 | 2.227143  | -0.695727 | 3.241632  |
| 80 | 6 | 0 | -4.771058 | -2.702058 | 0.245746  |
| 81 | 1 | 0 | -5.776738 | -2.404754 | 0.558957  |
| 82 | 1 | 0 | -4.869038 | -3.216970 | -0.716467 |
| 83 | 1 | 0 | -4.416663 | -3.428766 | 0.981097  |
| 84 | 1 | 0 | 6.193121  | 4.453893  | 2.556500  |
| 85 | 1 | 0 | 6.430056  | 5.270119  | 0.977169  |
| 86 | 1 | 0 | 4.795707  | 5.164498  | 1.685196  |

---



| Center<br>Number | Atomic<br>Number | Atomic<br>Type | Coordinates (Angstroms) |           |           |
|------------------|------------------|----------------|-------------------------|-----------|-----------|
|                  |                  |                | X                       | Y         | Z         |
| 1                | 6                | 0              | -0.908224               | 0.522189  | -0.759024 |
| 2                | 6                | 0              | 0.435120                | 1.081082  | -0.242622 |
| 3                | 1                | 0              | -0.796259               | 0.380403  | -1.837285 |
| 4                | 1                | 0              | -1.683907               | 1.284743  | -0.625136 |
| 5                | 1                | 0              | 0.355740                | 1.417563  | 0.795768  |
| 6                | 1                | 0              | 0.683748                | 1.957517  | -0.850805 |
| 7                | 6                | 0              | 3.620892                | -1.064099 | 0.310848  |
| 8                | 6                | 0              | 2.469202                | -2.091960 | 0.179686  |
| 9                | 6                | 0              | 1.198356                | -1.224776 | 0.491889  |
| 10               | 6                | 0              | 1.519110                | 0.010193  | -0.381814 |
| 11               | 6                | 0              | 2.746702                | -3.325239 | 1.009957  |
| 12               | 1                | 0              | 2.340897                | -2.436038 | -0.851224 |
| 13               | 8                | 0              | 1.194784                | -0.753585 | 1.858160  |
| 14               | 6                | 0              | -1.962909               | -3.165263 | -0.478799 |
| 15               | 6                | 0              | -2.363150               | -1.728259 | -0.949589 |
| 16               | 6                | 0              | -1.354856               | -0.808418 | -0.086499 |
| 17               | 6                | 0              | -0.156370               | -1.770628 | 0.098524  |
| 18               | 6                | 0              | -0.513514               | -3.044346 | -0.099327 |
| 19               | 1                | 0              | -2.556654               | -3.485067 | 0.391336  |
| 20               | 1                | 0              | -2.132497               | -3.917540 | -1.257826 |
| 21               | 6                | 0              | -2.042860               | -1.643055 | -2.459594 |
| 22               | 6                | 0              | -1.940406               | -0.476475 | 1.311316  |
| 23               | 1                | 0              | 0.142958                | -3.901235 | 0.008652  |
| 24               | 1                | 0              | -2.288147               | -0.670729 | -2.894197 |
| 25               | 1                | 0              | -0.981341               | -1.833539 | -2.645299 |
| 26               | 1                | 0              | -2.609196               | -2.400527 | -3.009619 |
| 27               | 1                | 0              | -1.191837               | 0.031504  | 1.922737  |
| 28               | 1                | 0              | -2.811215               | 0.180597  | 1.236418  |
| 29               | 1                | 0              | -2.246865               | -1.379935 | 1.847534  |
| 30               | 6                | 0              | -3.890065               | -1.473779 | -0.698260 |
| 31               | 6                | 0              | -4.367892               | -0.081159 | -1.174127 |
| 32               | 6                | 0              | -5.756748               | 0.338824  | -0.689323 |
| 33               | 6                | 0              | -6.165953               | 1.768983  | -1.097831 |
| 34               | 6                | 0              | -5.785706               | 2.626623  | 0.119070  |
| 35               | 6                | 0              | -5.822354               | 1.619190  | 1.263696  |
| 36               | 8                | 0              | -5.797030               | 0.355976  | 0.778840  |
| 37               | 1                | 0              | -6.510368               | -0.392854 | -0.984914 |
| 38               | 1                | 0              | -7.247732               | 1.818106  | -1.263007 |
| 39               | 1                | 0              | -5.670061               | 2.086443  | -2.018396 |
| 40               | 1                | 0              | -4.735304               | 2.941771  | 0.041601  |
| 41               | 6                | 0              | -6.651356               | 3.862029  | 0.371653  |
| 42               | 1                | 0              | -4.043352               | -1.521554 | 0.384755  |
| 43               | 1                | 0              | -4.405271               | -0.057323 | -2.270907 |
| 44               | 1                | 0              | -3.654886               | 0.693503  | -0.875141 |
| 45               | 8                | 0              | -5.854734               | 1.843146  | 2.456375  |
| 46               | 1                | 0              | -6.347601               | 4.365931  | 1.293154  |
| 47               | 1                | 0              | -6.553314               | 4.570036  | -0.456876 |
| 48               | 1                | 0              | -7.707547               | 3.587488  | 0.463428  |
| 49               | 1                | 0              | 1.437466                | -0.364617 | -1.412054 |
| 50               | 6                | 0              | 3.039944                | 0.339379  | -0.189984 |
| 51               | 6                | 0              | 3.620522                | 0.768375  | -1.550327 |

|    |   |   |           |           |           |
|----|---|---|-----------|-----------|-----------|
| 52 | 6 | 0 | 3.342738  | 1.397909  | 0.913192  |
| 53 | 1 | 0 | 4.679561  | 1.034703  | -1.486601 |
| 54 | 1 | 0 | 3.528988  | -0.035176 | -2.286968 |
| 55 | 1 | 0 | 3.080018  | 1.636518  | -1.942302 |
| 56 | 6 | 0 | 3.148645  | 2.893745  | 0.580682  |
| 57 | 6 | 0 | 4.225690  | 3.575118  | -0.238875 |
| 58 | 8 | 0 | 4.013499  | 4.384548  | -1.126620 |
| 59 | 8 | 0 | 5.469807  | 3.240032  | 0.160010  |
| 60 | 6 | 0 | 6.563755  | 3.892084  | -0.520941 |
| 61 | 6 | 0 | 4.955829  | -1.505407 | -0.272420 |
| 62 | 1 | 0 | 3.787468  | -0.944967 | 1.390271  |
| 63 | 6 | 0 | 5.079674  | -2.455516 | -1.212022 |
| 64 | 6 | 0 | 6.181611  | -0.831952 | 0.304217  |
| 65 | 1 | 0 | 6.058315  | -2.742773 | -1.587359 |
| 66 | 1 | 0 | 4.230878  | -2.977951 | -1.640841 |
| 67 | 1 | 0 | 6.240536  | -0.997804 | 1.387841  |
| 68 | 1 | 0 | 7.098433  | -1.215879 | -0.151505 |
| 69 | 1 | 0 | 6.157953  | 0.253539  | 0.155972  |
| 70 | 1 | 0 | 3.124166  | 3.441962  | 1.532623  |
| 71 | 1 | 0 | 2.200906  | 3.099062  | 0.083738  |
| 72 | 1 | 0 | 4.378865  | 1.269302  | 1.240458  |
| 73 | 1 | 0 | 2.717236  | 1.162163  | 1.777924  |
| 74 | 8 | 0 | 2.383784  | -4.453722 | 0.722532  |
| 75 | 1 | 0 | 3.358510  | -3.164981 | 1.921320  |
| 76 | 6 | 0 | 0.884320  | -1.683542 | 2.891480  |
| 77 | 1 | 0 | 0.037258  | -2.325284 | 2.628615  |
| 78 | 1 | 0 | 1.746710  | -2.314243 | 3.143035  |
| 79 | 1 | 0 | 0.624857  | -1.091025 | 3.772201  |
| 80 | 6 | 0 | -4.779525 | -2.575310 | -1.315406 |
| 81 | 1 | 0 | -5.823435 | -2.448232 | -1.012630 |
| 82 | 1 | 0 | -4.752183 | -2.558707 | -2.410757 |
| 83 | 1 | 0 | -4.477851 | -3.573036 | -0.986914 |
| 84 | 1 | 0 | 7.467949  | 3.498357  | -0.058717 |
| 85 | 1 | 0 | 6.542002  | 3.655277  | -1.586867 |
| 86 | 1 | 0 | 6.503192  | 4.974127  | -0.386153 |

---

| Center<br>Number | Atomic<br>Number | Atomic<br>Type | Coordinates (Angstroms) |           |           |
|------------------|------------------|----------------|-------------------------|-----------|-----------|
|                  |                  |                | X                       | Y         | Z         |
| 1                | 6                | 0              | -1.022266               | 0.154088  | -1.108607 |
| 2                | 6                | 0              | 0.360782                | 0.825176  | -0.967454 |
| 3                | 1                | 0              | -1.030652               | -0.361880 | -2.072506 |
| 4                | 1                | 0              | -1.791844               | 0.932236  | -1.164153 |
| 5                | 1                | 0              | 0.390016                | 1.490570  | -0.099808 |
| 6                | 1                | 0              | 0.539943                | 1.445319  | -1.854411 |
| 7                | 6                | 0              | 3.635616                | -1.126057 | -0.178343 |
| 8                | 6                | 0              | 2.477341                | -2.060656 | 0.280862  |
| 9                | 6                | 0              | 1.247416                | -1.099704 | 0.431213  |
| 10               | 6                | 0              | 1.433283                | -0.258766 | -0.851198 |
| 11               | 6                | 0              | 2.899827                | -2.905406 | 1.461301  |
| 12               | 1                | 0              | 2.194682                | -2.761885 | -0.507967 |
| 13               | 8                | 0              | 1.406053                | -0.190978 | 1.541653  |
| 14               | 6                | 0              | -1.977582               | -3.169784 | 0.578922  |
| 15               | 6                | 0              | -2.451630               | -1.981664 | -0.321700 |
| 16               | 6                | 0              | -1.363737               | -0.842797 | 0.037989  |
| 17               | 6                | 0              | -0.137905               | -1.710076 | 0.413980  |
| 18               | 6                | 0              | -0.496168               | -2.960642 | 0.723888  |
| 19               | 1                | 0              | -2.462989               | -3.145196 | 1.566663  |
| 20               | 1                | 0              | -2.224574               | -4.144021 | 0.141385  |
| 21               | 6                | 0              | -2.311470               | -2.444699 | -1.790187 |
| 22               | 6                | 0              | -1.787956               | -0.021894 | 1.283940  |
| 23               | 1                | 0              | 0.182516                | -3.739739 | 1.055257  |
| 24               | 1                | 0              | -2.618335               | -1.681984 | -2.510590 |
| 25               | 1                | 0              | -1.276944               | -2.720422 | -2.017036 |
| 26               | 1                | 0              | -2.929277               | -3.330072 | -1.967265 |
| 27               | 1                | 0              | -0.976568               | 0.640194  | 1.592674  |
| 28               | 1                | 0              | -2.664137               | 0.599334  | 1.077436  |
| 29               | 1                | 0              | -2.027567               | -0.668112 | 2.134106  |
| 30               | 6                | 0              | -3.942587               | -1.613269 | -0.006029 |
| 31               | 6                | 0              | -4.495821               | -0.476780 | -0.899391 |
| 32               | 6                | 0              | -5.801063               | 0.161750  | -0.420635 |
| 33               | 6                | 0              | -6.282761               | 1.344690  | -1.285294 |
| 34               | 6                | 0              | -5.719501               | 2.580983  | -0.567719 |
| 35               | 6                | 0              | -5.577021               | 2.095620  | 0.871022  |
| 36               | 8                | 0              | -5.618878               | 0.743347  | 0.916299  |
| 37               | 1                | 0              | -6.581952               | -0.590663 | -0.297711 |
| 38               | 1                | 0              | -7.377485               | 1.385635  | -1.291086 |
| 39               | 1                | 0              | -5.943633               | 1.257569  | -2.320450 |
| 40               | 1                | 0              | -4.693892               | 2.777833  | -0.911594 |
| 41               | 6                | 0              | -6.535322               | 3.868281  | -0.695443 |
| 42               | 1                | 0              | -3.969636               | -1.260224 | 1.029824  |
| 43               | 1                | 0              | -4.692207               | -0.863158 | -1.908038 |
| 44               | 1                | 0              | -3.753111               | 0.318313  | -1.016216 |
| 45               | 8                | 0              | -5.429395               | 2.762584  | 1.874379  |
| 46               | 1                | 0              | -6.093717               | 4.667280  | -0.093783 |
| 47               | 1                | 0              | -6.564317               | 4.197846  | -1.738477 |
| 48               | 1                | 0              | -7.565311               | 3.714278  | -0.356769 |
| 49               | 1                | 0              | 1.238850                | -0.967943 | -1.668717 |
| 50               | 6                | 0              | 2.952305                | 0.092571  | -0.964742 |
| 51               | 6                | 0              | 3.335177                | 0.155681  | -2.455334 |

|    |   |   |           |           |           |
|----|---|---|-----------|-----------|-----------|
| 52 | 6 | 0 | 3.237624  | 1.460351  | -0.282956 |
| 53 | 1 | 0 | 4.396961  | 0.364882  | -2.612097 |
| 54 | 1 | 0 | 3.112767  | -0.786683 | -2.963713 |
| 55 | 1 | 0 | 2.766471  | 0.950172  | -2.952426 |
| 56 | 6 | 0 | 4.710601  | 1.926466  | -0.249766 |
| 57 | 6 | 0 | 4.819157  | 3.259975  | 0.453246  |
| 58 | 8 | 0 | 4.938079  | 3.407901  | 1.657992  |
| 59 | 8 | 0 | 4.737287  | 4.294632  | -0.409257 |
| 60 | 6 | 0 | 4.778867  | 5.619277  | 0.165801  |
| 61 | 6 | 0 | 4.772808  | -1.868167 | -0.880960 |
| 62 | 1 | 0 | 4.066808  | -0.697776 | 0.736338  |
| 63 | 6 | 0 | 4.603155  | -3.003960 | -1.575357 |
| 64 | 6 | 0 | 6.157914  | -1.276787 | -0.739263 |
| 65 | 1 | 0 | 5.448319  | -3.494829 | -2.050324 |
| 66 | 1 | 0 | 3.640082  | -3.486552 | -1.704140 |
| 67 | 1 | 0 | 6.913046  | -1.928514 | -1.186808 |
| 68 | 1 | 0 | 6.234734  | -0.296868 | -1.223147 |
| 69 | 1 | 0 | 6.415880  | -1.128829 | 0.317184  |
| 70 | 1 | 0 | 5.117791  | 2.023508  | -1.259035 |
| 71 | 1 | 0 | 5.324027  | 1.221767  | 0.315144  |
| 72 | 1 | 0 | 2.861820  | 1.422289  | 0.741743  |
| 73 | 1 | 0 | 2.656315  | 2.225674  | -0.810597 |
| 74 | 8 | 0 | 2.531524  | -4.050866 | 1.661519  |
| 75 | 1 | 0 | 3.626379  | -2.435500 | 2.155879  |
| 76 | 6 | 0 | 1.215072  | -0.693608 | 2.860645  |
| 77 | 1 | 0 | 2.077095  | -1.280142 | 3.202970  |
| 78 | 1 | 0 | 1.116002  | 0.180219  | 3.508901  |
| 79 | 1 | 0 | 0.312034  | -1.306793 | 2.942049  |
| 80 | 6 | 0 | -4.880921 | -2.838070 | -0.074528 |
| 81 | 1 | 0 | -5.886554 | -2.577515 | 0.269858  |
| 82 | 1 | 0 | -4.975452 | -3.226127 | -1.094818 |
| 83 | 1 | 0 | -4.532948 | -3.653747 | 0.564148  |
| 84 | 1 | 0 | 4.701112  | 6.303183  | -0.678184 |
| 85 | 1 | 0 | 3.942597  | 5.760263  | 0.853894  |
| 86 | 1 | 0 | 5.720109  | 5.771107  | 0.698304  |

---

| Center<br>Number | Atomic<br>Number | Atomic<br>Type | Coordinates (Angstroms) |           |           |
|------------------|------------------|----------------|-------------------------|-----------|-----------|
|                  |                  |                | X                       | Y         | Z         |
| 1                | 6                | 0              | -1.003255               | 0.555487  | -0.839329 |
| 2                | 6                | 0              | 0.341193                | 1.137406  | -0.354764 |
| 3                | 1                | 0              | -0.889754               | 0.330068  | -1.903161 |
| 4                | 1                | 0              | -1.775884               | 1.329156  | -0.766090 |
| 5                | 1                | 0              | 0.257984                | 1.530424  | 0.662698  |
| 6                | 1                | 0              | 0.612152                | 1.980089  | -1.002311 |
| 7                | 6                | 0              | 3.541402                | -1.011776 | 0.203053  |
| 8                | 6                | 0              | 2.350670                | -2.015798 | 0.263914  |
| 9                | 6                | 0              | 1.096432                | -1.117468 | 0.539657  |
| 10               | 6                | 0              | 1.411640                | 0.047285  | -0.425208 |
| 11               | 6                | 0              | 2.657385                | -3.160344 | 1.202726  |
| 12               | 1                | 0              | 2.164875                | -2.468916 | -0.712768 |
| 13               | 8                | 0              | 1.111238                | -0.565334 | 1.874184  |
| 14               | 6                | 0              | -2.086466               | -3.094184 | -0.280089 |
| 15               | 6                | 0              | -2.475436               | -1.692326 | -0.855767 |
| 16               | 6                | 0              | -1.457090               | -0.718403 | -0.066157 |
| 17               | 6                | 0              | -0.267200               | -1.675933 | 0.191121  |
| 18               | 6                | 0              | -0.636279               | -2.957292 | 0.089925  |
| 19               | 1                | 0              | -2.683506               | -3.345577 | 0.610010  |
| 20               | 1                | 0              | -2.261382               | -3.900167 | -1.002196 |
| 21               | 6                | 0              | -2.158485               | -1.723780 | -2.368497 |
| 22               | 6                | 0              | -2.037192               | -0.276254 | 1.303143  |
| 23               | 1                | 0              | 0.013069                | -3.809437 | 0.262483  |
| 24               | 1                | 0              | -2.400083               | -0.786522 | -2.876348 |
| 25               | 1                | 0              | -1.098251               | -1.932785 | -2.541027 |
| 26               | 1                | 0              | -2.729720               | -2.518318 | -2.857762 |
| 27               | 1                | 0              | -1.280836               | 0.262363  | 1.877575  |
| 28               | 1                | 0              | -2.896456               | 0.388779  | 1.179449  |
| 29               | 1                | 0              | -2.360031               | -1.132378 | 1.903481  |
| 30               | 6                | 0              | -3.999853               | -1.408496 | -0.621011 |
| 31               | 6                | 0              | -4.464544               | -0.042616 | -1.180026 |
| 32               | 6                | 0              | -5.865539               | 0.401562  | -0.755092 |
| 33               | 6                | 0              | -6.245910               | 1.823937  | -1.214713 |
| 34               | 6                | 0              | -5.890814               | 2.709816  | -0.010437 |
| 35               | 6                | 0              | -5.983271               | 1.735477  | 1.159288  |
| 36               | 8                | 0              | -5.957622               | 0.459095  | 0.709829  |
| 37               | 1                | 0              | -6.615212               | -0.331169 | -1.057910 |
| 38               | 1                | 0              | -7.321945               | 1.880557  | -1.412176 |
| 39               | 1                | 0              | -5.720448               | 2.110934  | -2.128953 |
| 40               | 1                | 0              | -4.832676               | 3.003965  | -0.061604 |
| 41               | 6                | 0              | -6.741186               | 3.966952  | 0.178253  |
| 42               | 1                | 0              | -4.153867               | -1.388299 | 0.462756  |
| 43               | 1                | 0              | -4.472897               | -0.074096 | -2.277222 |
| 44               | 1                | 0              | -3.758637               | 0.745893  | -0.901670 |
| 45               | 8                | 0              | -6.056402               | 1.992404  | 2.343438  |
| 46               | 1                | 0              | -6.459802               | 4.491215  | 1.095563  |
| 47               | 1                | 0              | -6.601492               | 4.649687  | -0.665388 |
| 48               | 1                | 0              | -7.804929               | 3.714232  | 0.240941  |
| 49               | 1                | 0              | 1.320648                | -0.403217 | -1.424254 |
| 50               | 6                | 0              | 2.927584                | 0.394224  | -0.268278 |
| 51               | 6                | 0              | 3.470060                | 0.868935  | -1.628434 |

|    |   |   |           |           |           |
|----|---|---|-----------|-----------|-----------|
| 52 | 6 | 0 | 3.116273  | 1.498456  | 0.810744  |
| 53 | 1 | 0 | 4.542519  | 1.083119  | -1.601689 |
| 54 | 1 | 0 | 3.314851  | 0.112150  | -2.402526 |
| 55 | 1 | 0 | 2.957663  | 1.785897  | -1.938190 |
| 56 | 6 | 0 | 4.547062  | 1.981332  | 1.111923  |
| 57 | 6 | 0 | 5.087675  | 3.019518  | 0.150669  |
| 58 | 8 | 0 | 4.446066  | 3.943174  | -0.318677 |
| 59 | 8 | 0 | 6.403217  | 2.840030  | -0.095917 |
| 60 | 6 | 0 | 7.041940  | 3.822301  | -0.941525 |
| 61 | 6 | 0 | 4.745562  | -1.558340 | -0.566479 |
| 62 | 1 | 0 | 3.879339  | -0.865827 | 1.237787  |
| 63 | 6 | 0 | 4.645602  | -2.427784 | -1.583874 |
| 64 | 6 | 0 | 6.111313  | -1.094721 | -0.110285 |
| 65 | 1 | 0 | 5.534481  | -2.791449 | -2.092303 |
| 66 | 1 | 0 | 3.698605  | -2.805805 | -1.954419 |
| 67 | 1 | 0 | 6.905918  | -1.636554 | -0.630460 |
| 68 | 1 | 0 | 6.263870  | -0.025605 | -0.295585 |
| 69 | 1 | 0 | 6.239747  | -1.251099 | 0.968473  |
| 70 | 1 | 0 | 5.260742  | 1.161409  | 1.204520  |
| 71 | 1 | 0 | 4.535507  | 2.484471  | 2.088441  |
| 72 | 1 | 0 | 2.680660  | 1.133636  | 1.742535  |
| 73 | 1 | 0 | 2.532622  | 2.376485  | 0.515228  |
| 74 | 8 | 0 | 2.296027  | -4.312951 | 1.033287  |
| 75 | 1 | 0 | 3.291283  | -2.910265 | 2.078684  |
| 76 | 6 | 0 | 0.772885  | -1.420096 | 2.961874  |
| 77 | 1 | 0 | 0.596754  | -0.767197 | 3.820098  |
| 78 | 1 | 0 | -0.130734 | -2.004593 | 2.762760  |
| 79 | 1 | 0 | 1.591737  | -2.106221 | 3.213008  |
| 80 | 6 | 0 | -4.900392 | -2.537245 | -1.169424 |
| 81 | 1 | 0 | -5.937979 | -2.396455 | -0.851569 |
| 82 | 1 | 0 | -4.894642 | -2.570835 | -2.264830 |
| 83 | 1 | 0 | -4.591306 | -3.518962 | -0.802006 |
| 84 | 1 | 0 | 6.963149  | 4.815601  | -0.494520 |
| 85 | 1 | 0 | 8.084002  | 3.512634  | -1.007268 |
| 86 | 1 | 0 | 6.579492  | 3.828644  | -1.930837 |

---

| Center<br>Number | Atomic<br>Number | Atomic<br>Type | Coordinates (Angstroms) |           |           |
|------------------|------------------|----------------|-------------------------|-----------|-----------|
|                  |                  |                | X                       | Y         | Z         |
| 1                | 6                | 0              | -0.768233               | 0.227861  | -1.107686 |
| 2                | 6                | 0              | 0.620877                | 0.868144  | -0.893871 |
| 3                | 1                | 0              | -0.750593               | -0.241286 | -2.095187 |
| 4                | 1                | 0              | -1.521058               | 1.022789  | -1.153563 |
| 5                | 1                | 0              | 0.634576                | 1.506096  | -0.004949 |
| 6                | 1                | 0              | 0.828243                | 1.509318  | -1.757843 |
| 7                | 6                | 0              | 3.818962                | -1.130989 | 0.031232  |
| 8                | 6                | 0              | 2.647562                | -2.106922 | 0.305559  |
| 9                | 6                | 0              | 1.419207                | -1.136909 | 0.441477  |
| 10               | 6                | 0              | 1.677626                | -0.233069 | -0.785706 |
| 11               | 6                | 0              | 2.976752                | -3.043305 | 1.446286  |
| 12               | 1                | 0              | 2.426858                | -2.739100 | -0.560079 |
| 13               | 8                | 0              | 1.544296                | -0.278054 | 1.596179  |
| 14               | 6                | 0              | -1.833623               | -3.164000 | 0.353608  |
| 15               | 6                | 0              | -2.263367               | -1.915150 | -0.484701 |
| 16               | 6                | 0              | -1.169127               | -0.817440 | -0.026712 |
| 17               | 6                | 0              | 0.028986                | -1.724306 | 0.340252  |
| 18               | 6                | 0              | -0.355759               | -2.986137 | 0.560360  |
| 19               | 1                | 0              | -2.351346               | -3.195291 | 1.324600  |
| 20               | 1                | 0              | -2.077742               | -4.105008 | -0.153054 |
| 21               | 6                | 0              | -2.089127               | -2.290210 | -1.974584 |
| 22               | 6                | 0              | -1.624543               | -0.054233 | 1.244560  |
| 23               | 1                | 0              | 0.300122                | -3.794452 | 0.865671  |
| 24               | 1                | 0              | -2.367202               | -1.480323 | -2.654101 |
| 25               | 1                | 0              | -1.052034               | -2.565028 | -2.190805 |
| 26               | 1                | 0              | -2.711348               | -3.155197 | -2.222742 |
| 27               | 1                | 0              | -0.816772               | 0.582799  | 1.610080  |
| 28               | 1                | 0              | -2.488676               | 0.584821  | 1.042317  |
| 29               | 1                | 0              | -1.895249               | -0.740306 | 2.053313  |
| 30               | 6                | 0              | -3.757138               | -1.544230 | -0.187160 |
| 31               | 6                | 0              | -4.265622               | -0.336415 | -1.011305 |
| 32               | 6                | 0              | -5.566430               | 0.289572  | -0.525732 |
| 33               | 6                | 0              | -6.072914               | 1.475434  | -1.364436 |
| 34               | 6                | 0              | -6.766286               | 2.381963  | -0.333529 |
| 35               | 6                | 0              | -6.050674               | 2.014764  | 0.963460  |
| 36               | 8                | 0              | -5.367689               | 0.855843  | 0.815037  |
| 37               | 1                | 0              | -6.350358               | -0.466926 | -0.416907 |
| 38               | 1                | 0              | -6.739049               | 1.147127  | -2.166921 |
| 39               | 1                | 0              | -5.222557               | 1.994372  | -1.820455 |
| 40               | 1                | 0              | -6.587945               | 3.443354  | -0.528663 |
| 41               | 6                | 0              | -8.283793               | 2.151420  | -0.196103 |
| 42               | 1                | 0              | -3.807914               | -1.264062 | 0.870240  |
| 43               | 1                | 0              | -4.435341               | -0.642339 | -2.052359 |
| 44               | 1                | 0              | -3.514631               | 0.458165  | -1.040954 |
| 45               | 8                | 0              | -6.061258               | 2.618924  | 2.016676  |
| 46               | 1                | 0              | -8.693644               | 2.748924  | 0.623053  |
| 47               | 1                | 0              | -8.787358               | 2.444382  | -1.122227 |
| 48               | 1                | 0              | -8.516396               | 1.098900  | -0.001437 |
| 49               | 1                | 0              | 1.506618                | -0.895781 | -1.646311 |
| 50               | 6                | 0              | 3.211331                | 0.082468  | -0.818996 |
| 51               | 6                | 0              | 3.681638                | 0.071521  | -2.285575 |

|    |   |   |           |           |           |
|----|---|---|-----------|-----------|-----------|
| 52 | 6 | 0 | 3.634599  | 1.405246  | -0.113275 |
| 53 | 1 | 0 | 4.736149  | 0.348070  | -2.386974 |
| 54 | 1 | 0 | 3.555233  | -0.919533 | -2.730507 |
| 55 | 1 | 0 | 3.095223  | 0.778560  | -2.882522 |
| 56 | 6 | 0 | 3.420877  | 2.724630  | -0.893759 |
| 57 | 6 | 0 | 3.910839  | 3.905543  | -0.086995 |
| 58 | 8 | 0 | 3.203658  | 4.660728  | 0.558628  |
| 59 | 8 | 0 | 5.254799  | 4.025544  | -0.139353 |
| 60 | 6 | 0 | 5.838545  | 5.097150  | 0.632900  |
| 61 | 6 | 0 | 5.092972  | -1.774323 | -0.497557 |
| 62 | 1 | 0 | 4.079102  | -0.702919 | 1.008803  |
| 63 | 6 | 0 | 5.124762  | -2.965700 | -1.114343 |
| 64 | 6 | 0 | 6.372952  | -1.005608 | -0.252930 |
| 65 | 1 | 0 | 6.064331  | -3.387495 | -1.461291 |
| 66 | 1 | 0 | 4.236914  | -3.561929 | -1.297554 |
| 67 | 1 | 0 | 7.243454  | -1.553747 | -0.623400 |
| 68 | 1 | 0 | 6.359466  | -0.025404 | -0.743138 |
| 69 | 1 | 0 | 6.514839  | -0.817423 | 0.819068  |
| 70 | 1 | 0 | 2.366627  | 2.899934  | -1.106260 |
| 71 | 1 | 0 | 3.970411  | 2.700441  | -1.838949 |
| 72 | 1 | 0 | 4.704971  | 1.334435  | 0.109119  |
| 73 | 1 | 0 | 3.115475  | 1.464903  | 0.847626  |
| 74 | 8 | 0 | 2.582146  | -4.193953 | 1.537132  |
| 75 | 1 | 0 | 3.657802  | -2.637760 | 2.222360  |
| 76 | 6 | 0 | 1.303154  | -0.837145 | 2.883870  |
| 77 | 1 | 0 | 0.416850  | -1.479397 | 2.895597  |
| 78 | 1 | 0 | 2.165639  | -1.411355 | 3.246230  |
| 79 | 1 | 0 | 1.143740  | 0.005983  | 3.560334  |
| 80 | 6 | 0 | -4.709823 | -2.745871 | -0.369301 |
| 81 | 1 | 0 | -5.720468 | -2.496212 | -0.031530 |
| 82 | 1 | 0 | -4.783452 | -3.055313 | -1.417808 |
| 83 | 1 | 0 | -4.388709 | -3.611767 | 0.215008  |
| 84 | 1 | 0 | 6.911800  | 5.025741  | 0.461959  |
| 85 | 1 | 0 | 5.458206  | 6.061717  | 0.289987  |
| 86 | 1 | 0 | 5.608476  | 4.969744  | 1.692887  |

---



| Center<br>Number | Atomic<br>Number | Atomic<br>Type | Coordinates (Angstroms) |           |           |
|------------------|------------------|----------------|-------------------------|-----------|-----------|
|                  |                  |                | X                       | Y         | Z         |
| 1                | 6                | 0              | -0.986992               | 0.563204  | -0.819840 |
| 2                | 6                | 0              | 0.360547                | 1.134180  | -0.330063 |
| 3                | 1                | 0              | -0.875509               | 0.351990  | -1.886773 |
| 4                | 1                | 0              | -1.756917               | 1.338412  | -0.735337 |
| 5                | 1                | 0              | 0.281734                | 1.516445  | 0.691882  |
| 6                | 1                | 0              | 0.634624                | 1.982317  | -0.969131 |
| 7                | 6                | 0              | 3.546541                | -1.017599 | 0.253454  |
| 8                | 6                | 0              | 2.360195                | -2.032120 | 0.271448  |
| 9                | 6                | 0              | 1.105268                | -1.130115 | 0.543930  |
| 10               | 6                | 0              | 1.425413                | 0.040013  | -0.413268 |
| 11               | 6                | 0              | 2.650565                | -3.182740 | 1.205363  |
| 12               | 1                | 0              | 2.199644                | -2.471334 | -0.717430 |
| 13               | 8                | 0              | 1.120993                | -0.581976 | 1.879884  |
| 14               | 6                | 0              | -2.077354               | -3.092718 | -0.305287 |
| 15               | 6                | 0              | -2.461656               | -1.684032 | -0.867957 |
| 16               | 6                | 0              | -1.445606               | -0.719775 | -0.063545 |
| 17               | 6                | 0              | -0.258226               | -1.682191 | 0.188523  |
| 18               | 6                | 0              | -0.628629               | -2.961850 | 0.072581  |
| 19               | 1                | 0              | -2.678745               | -3.352411 | 0.579443  |
| 20               | 1                | 0              | -2.250119               | -3.890788 | -1.036613 |
| 21               | 6                | 0              | -2.138062               | -1.699533 | -2.379409 |
| 22               | 6                | 0              | -2.031638               | -0.291468 | 1.307652  |
| 23               | 1                | 0              | 0.018108                | -3.817510 | 0.238033  |
| 24               | 1                | 0              | -2.377704               | -0.756851 | -2.878042 |
| 25               | 1                | 0              | -1.077088               | -1.906715 | -2.549611 |
| 26               | 1                | 0              | -2.707117               | -2.488743 | -2.879686 |
| 27               | 1                | 0              | -1.278680               | 0.243689  | 1.889738  |
| 28               | 1                | 0              | -2.891200               | 0.373446  | 1.186321  |
| 29               | 1                | 0              | -2.356008               | -1.153186 | 1.899060  |
| 30               | 6                | 0              | -3.986735               | -1.401216 | -0.636568 |
| 31               | 6                | 0              | -4.448126               | -0.028545 | -1.181476 |
| 32               | 6                | 0              | -5.849139               | 0.412762  | -0.753526 |
| 33               | 6                | 0              | -6.227872               | 1.840082  | -1.199052 |
| 34               | 6                | 0              | -5.875456               | 2.713405  | 0.015164  |
| 35               | 6                | 0              | -5.968580               | 1.726766  | 1.174472  |
| 36               | 8                | 0              | -5.942731               | 0.455114  | 0.711746  |
| 37               | 1                | 0              | -6.599143               | -0.316132 | -1.064691 |
| 38               | 1                | 0              | -7.303391               | 1.899084  | -1.398552 |
| 39               | 1                | 0              | -5.700071               | 2.136332  | -2.108964 |
| 40               | 1                | 0              | -4.817671               | 3.009539  | -0.031187 |
| 41               | 6                | 0              | -6.727816               | 3.967324  | 0.216070  |
| 42               | 1                | 0              | -4.145174               | -1.393573 | 0.446729  |
| 43               | 1                | 0              | -4.454965               | -0.048074 | -2.278962 |
| 44               | 1                | 0              | -3.741521               | 0.755864  | -0.893490 |
| 45               | 8                | 0              | -6.042387               | 1.971273  | 2.361196  |
| 46               | 1                | 0              | -6.448619               | 4.481870  | 1.139509  |
| 47               | 1                | 0              | -6.587663               | 4.659425  | -0.619821 |
| 48               | 1                | 0              | -7.791313               | 3.712480  | 0.274191  |
| 49               | 1                | 0              | 1.327524                | -0.402789 | -1.415084 |
| 50               | 6                | 0              | 2.942639                | 0.374517  | -0.259310 |
| 51               | 6                | 0              | 3.497783                | 0.851904  | -1.615215 |

|    |   |   |           |           |           |
|----|---|---|-----------|-----------|-----------|
| 52 | 6 | 0 | 3.169914  | 1.485241  | 0.805520  |
| 53 | 1 | 0 | 4.588467  | 0.943428  | -1.605380 |
| 54 | 1 | 0 | 3.232580  | 0.170600  | -2.428023 |
| 55 | 1 | 0 | 3.082088  | 1.833934  | -1.862798 |
| 56 | 6 | 0 | 4.624670  | 1.949739  | 1.010442  |
| 57 | 6 | 0 | 5.068194  | 3.085251  | 0.110256  |
| 58 | 8 | 0 | 4.349730  | 3.966838  | -0.327918 |
| 59 | 8 | 0 | 6.398743  | 3.046097  | -0.114458 |
| 60 | 6 | 0 | 6.954290  | 4.128222  | -0.893193 |
| 61 | 6 | 0 | 4.789114  | -1.583468 | -0.428868 |
| 62 | 1 | 0 | 3.825619  | -0.851858 | 1.299992  |
| 63 | 6 | 0 | 5.985950  | -1.512275 | 0.175327  |
| 64 | 6 | 0 | 4.651193  | -2.304881 | -1.753310 |
| 65 | 1 | 0 | 6.881228  | -1.918151 | -0.288474 |
| 66 | 1 | 0 | 6.110712  | -1.054330 | 1.153031  |
| 67 | 1 | 0 | 5.634048  | -2.510259 | -2.185956 |
| 68 | 1 | 0 | 4.142152  | -3.267910 | -1.623066 |
| 69 | 1 | 0 | 4.068868  | -1.738397 | -2.485087 |
| 70 | 1 | 0 | 5.345041  | 1.133643  | 0.926698  |
| 71 | 1 | 0 | 4.731032  | 2.344494  | 2.030312  |
| 72 | 1 | 0 | 2.779570  | 1.126933  | 1.759946  |
| 73 | 1 | 0 | 2.575681  | 2.363818  | 0.534163  |
| 74 | 8 | 0 | 2.354960  | -4.345665 | 0.982891  |
| 75 | 1 | 0 | 3.211616  | -2.929341 | 2.127521  |
| 76 | 6 | 0 | 0.755828  | -1.428811 | 2.965781  |
| 77 | 1 | 0 | 1.566253  | -2.116182 | 3.238723  |
| 78 | 1 | 0 | 0.563547  | -0.769908 | 3.815949  |
| 79 | 1 | 0 | -0.145552 | -2.010838 | 2.751039  |
| 80 | 6 | 0 | -4.885818 | -2.522668 | -1.202083 |
| 81 | 1 | 0 | -5.924962 | -2.383757 | -0.888514 |
| 82 | 1 | 0 | -4.874032 | -2.544366 | -2.297735 |
| 83 | 1 | 0 | -4.580226 | -3.508773 | -0.843611 |
| 84 | 1 | 0 | 8.022995  | 3.925536  | -0.947748 |
| 85 | 1 | 0 | 6.514518  | 4.140622  | -1.892802 |
| 86 | 1 | 0 | 6.768886  | 5.085203  | -0.400541 |

---

| Center<br>Number | Atomic<br>Number | Atomic<br>Type | Coordinates (Angstroms) |           |           |
|------------------|------------------|----------------|-------------------------|-----------|-----------|
|                  |                  |                | X                       | Y         | Z         |
| 1                | 6                | 0              | -0.790087               | 0.037268  | -1.226766 |
| 2                | 6                | 0              | 0.589318                | 0.733683  | -1.220411 |
| 3                | 1                | 0              | -0.826744               | -0.579015 | -2.129094 |
| 4                | 1                | 0              | -1.571715               | 0.797330  | -1.336235 |
| 5                | 1                | 0              | 0.638274                | 1.511440  | -0.453188 |
| 6                | 1                | 0              | 0.730573                | 1.228250  | -2.188714 |
| 7                | 6                | 0              | 3.909800                | -0.928192 | -0.166557 |
| 8                | 6                | 0              | 2.818115                | -1.895340 | 0.362977  |
| 9                | 6                | 0              | 1.541194                | -0.979560 | 0.392798  |
| 10               | 6                | 0              | 1.671079                | -0.323689 | -0.999377 |
| 11               | 6                | 0              | 3.256304                | -2.580701 | 1.637707  |
| 12               | 1                | 0              | 2.596333                | -2.690582 | -0.356225 |
| 13               | 8                | 0              | 1.675770                | 0.080303  | 1.363543  |
| 14               | 6                | 0              | -1.620690               | -3.098420 | 0.851817  |
| 15               | 6                | 0              | -2.139883               | -2.037062 | -0.172912 |
| 16               | 6                | 0              | -1.079268               | -0.835207 | 0.033097  |
| 17               | 6                | 0              | 0.176099                | -1.623966 | 0.483339  |
| 18               | 6                | 0              | -0.143145               | -2.838253 | 0.943507  |
| 19               | 1                | 0              | -2.091054               | -2.969641 | 1.838809  |
| 20               | 1                | 0              | -1.849189               | -4.122771 | 0.535538  |
| 21               | 6                | 0              | -2.005149               | -2.663732 | -1.580027 |
| 22               | 6                | 0              | -1.508400               | 0.110379  | 1.185648  |
| 23               | 1                | 0              | 0.561574                | -3.555997 | 1.350178  |
| 24               | 1                | 0              | -2.353022               | -2.002416 | -2.377853 |
| 25               | 1                | 0              | -0.963698               | -2.923263 | -1.793625 |
| 26               | 1                | 0              | -2.588950               | -3.587046 | -1.641524 |
| 27               | 1                | 0              | -0.722474               | 0.841845  | 1.386097  |
| 28               | 1                | 0              | -2.419608               | 0.660251  | 0.935075  |
| 29               | 1                | 0              | -1.691647               | -0.440395 | 2.113662  |
| 30               | 6                | 0              | -3.636184               | -1.674878 | 0.122883  |
| 31               | 6                | 0              | -4.232641               | -0.663833 | -0.885916 |
| 32               | 6                | 0              | -5.527553               | 0.011233  | -0.453717 |
| 33               | 6                | 0              | -6.134041               | 0.974926  | -1.487954 |
| 34               | 6                | 0              | -6.794633               | 2.066135  | -0.628813 |
| 35               | 6                | 0              | -5.986713               | 2.003857  | 0.664314  |
| 36               | 8                | 0              | -5.271092               | 0.856772  | 0.720448  |
| 37               | 1                | 0              | -6.270332               | -0.726343 | -0.132969 |
| 38               | 1                | 0              | -6.837258               | 0.463887  | -2.150978 |
| 39               | 1                | 0              | -5.336657               | 1.403681  | -2.104820 |
| 40               | 1                | 0              | -6.668123               | 3.064341  | -1.057923 |
| 41               | 6                | 0              | -8.290858               | 1.837115  | -0.339881 |
| 42               | 1                | 0              | -3.658589               | -1.204957 | 1.111863  |
| 43               | 1                | 0              | -4.444620               | -1.170551 | -1.836861 |
| 44               | 1                | 0              | -3.515254               | 0.129871  | -1.112700 |
| 45               | 8                | 0              | -5.955063               | 2.820405  | 1.562566  |
| 46               | 1                | 0              | -8.668470               | 2.586961  | 0.360908  |
| 47               | 1                | 0              | -8.862949               | 1.914332  | -1.269287 |
| 48               | 1                | 0              | -8.472364               | 0.845911  | 0.089460  |
| 49               | 1                | 0              | 1.419288                | -1.141364 | -1.688685 |
| 50               | 6                | 0              | 3.191329                | -0.030326 | -1.267246 |
| 51               | 6                | 0              | 3.506178                | -0.518570 | -2.699388 |

|    |   |   |           |           |           |
|----|---|---|-----------|-----------|-----------|
| 52 | 6 | 0 | 3.588648  | 1.471596  | -1.227423 |
| 53 | 1 | 0 | 4.550852  | -0.344466 | -2.975079 |
| 54 | 1 | 0 | 3.307427  | -1.588591 | -2.812528 |
| 55 | 1 | 0 | 2.878875  | 0.017859  | -3.421298 |
| 56 | 6 | 0 | 3.553391  | 2.215752  | 0.111483  |
| 57 | 6 | 0 | 3.740811  | 3.708973  | -0.044575 |
| 58 | 8 | 0 | 3.670882  | 4.338914  | -1.085875 |
| 59 | 8 | 0 | 3.982278  | 4.294951  | 1.148850  |
| 60 | 6 | 0 | 4.131113  | 5.731143  | 1.144582  |
| 61 | 6 | 0 | 5.224027  | -1.582517 | -0.564564 |
| 62 | 1 | 0 | 4.143980  | -0.265640 | 0.675847  |
| 63 | 6 | 0 | 5.351044  | -2.888131 | -0.847650 |
| 64 | 6 | 0 | 6.430581  | -0.670671 | -0.587486 |
| 65 | 1 | 0 | 6.317439  | -3.308514 | -1.113029 |
| 66 | 1 | 0 | 4.516611  | -3.581532 | -0.830012 |
| 67 | 1 | 0 | 7.339914  | -1.217956 | -0.849991 |
| 68 | 1 | 0 | 6.308139  | 0.145682  | -1.308617 |
| 69 | 1 | 0 | 6.582868  | -0.201627 | 0.393127  |
| 70 | 1 | 0 | 4.323779  | 1.861388  | 0.803803  |
| 71 | 1 | 0 | 2.604299  | 2.057791  | 0.633778  |
| 72 | 1 | 0 | 2.939729  | 2.002249  | -1.931766 |
| 73 | 1 | 0 | 4.598449  | 1.569744  | -1.642709 |
| 74 | 8 | 0 | 2.901667  | -3.695626 | 1.983307  |
| 75 | 1 | 0 | 3.976682  | -2.018128 | 2.265935  |
| 76 | 6 | 0 | 1.542188  | -0.246160 | 2.743663  |
| 77 | 1 | 0 | 0.702578  | -0.924072 | 2.926759  |
| 78 | 1 | 0 | 2.459319  | -0.695093 | 3.145705  |
| 79 | 1 | 0 | 1.363434  | 0.695936  | 3.267557  |
| 80 | 6 | 0 | -4.539435 | -2.924135 | 0.212921  |
| 81 | 1 | 0 | -5.551226 | -2.650360 | 0.528203  |
| 82 | 1 | 0 | -4.627299 | -3.437891 | -0.750843 |
| 83 | 1 | 0 | -4.167724 | -3.644913 | 0.945629  |
| 84 | 1 | 0 | 4.975954  | 6.023920  | 0.517379  |
| 85 | 1 | 0 | 3.219770  | 6.206504  | 0.775210  |
| 86 | 1 | 0 | 4.312058  | 6.005918  | 2.182878  |

---

| Center<br>Number | Atomic<br>Number | Atomic<br>Type | Coordinates (Angstroms) |           |           |
|------------------|------------------|----------------|-------------------------|-----------|-----------|
|                  |                  |                | X                       | Y         | Z         |
| 1                | 6                | 0              | -1.002686               | 0.152722  | -1.151326 |
| 2                | 6                | 0              | 0.394477                | 0.804347  | -1.078844 |
| 3                | 1                | 0              | -1.028099               | -0.446290 | -2.065899 |
| 4                | 1                | 0              | -1.757410               | 0.937942  | -1.270907 |
| 5                | 1                | 0              | 0.446213                | 1.546465  | -0.277195 |
| 6                | 1                | 0              | 0.580639                | 1.335888  | -2.019895 |
| 7                | 6                | 0              | 3.639686                | -1.169203 | -0.199172 |
| 8                | 6                | 0              | 2.477757                | -1.972232 | 0.447554  |
| 9                | 6                | 0              | 1.254822                | -0.995265 | 0.492580  |
| 10               | 6                | 0              | 1.443396                | -0.287149 | -0.867739 |
| 11               | 6                | 0              | 2.876450                | -2.680526 | 1.721066  |
| 12               | 1                | 0              | 2.153720                | -2.786536 | -0.214849 |
| 13               | 8                | 0              | 1.417837                | 0.018860  | 1.508689  |
| 14               | 6                | 0              | -2.016718               | -2.981977 | 0.839520  |
| 15               | 6                | 0              | -2.465940               | -1.876944 | -0.171206 |
| 16               | 6                | 0              | -1.356198               | -0.730923 | 0.081852  |
| 17               | 6                | 0              | -0.142799               | -1.582166 | 0.535025  |
| 18               | 6                | 0              | -0.531127               | -2.789153 | 0.960615  |
| 19               | 1                | 0              | -2.498109               | -2.850177 | 1.820598  |
| 20               | 1                | 0              | -2.285202               | -3.988285 | 0.498119  |
| 21               | 6                | 0              | -2.333020               | -2.479075 | -1.589120 |
| 22               | 6                | 0              | -1.760491               | 0.206428  | 1.250084  |
| 23               | 1                | 0              | 0.118773                | -3.557535 | 1.367666  |
| 24               | 1                | 0              | -2.635246               | -1.785272 | -2.377812 |
| 25               | 1                | 0              | -1.300938               | -2.781988 | -1.790767 |
| 26               | 1                | 0              | -2.957883               | -3.372483 | -1.681772 |
| 27               | 1                | 0              | -0.939205               | 0.884897  | 1.489760  |
| 28               | 1                | 0              | -2.632321               | 0.814468  | 0.993223  |
| 29               | 1                | 0              | -1.998788               | -0.357025 | 2.157767  |
| 30               | 6                | 0              | -3.949251               | -1.452282 | 0.105276  |
| 31               | 6                | 0              | -4.479072               | -0.392805 | -0.890642 |
| 32               | 6                | 0              | -5.759279               | 0.319371  | -0.474431 |
| 33               | 6                | 0              | -6.295603               | 1.338621  | -1.494233 |
| 34               | 6                | 0              | -6.939733               | 2.427458  | -0.619740 |
| 35               | 6                | 0              | -6.176338               | 2.291500  | 0.694761  |
| 36               | 8                | 0              | -5.506712               | 1.115862  | 0.733707  |
| 37               | 1                | 0              | -6.539751               | -0.398099 | -0.200955 |
| 38               | 1                | 0              | -6.997078               | 0.876807  | -2.194276 |
| 39               | 1                | 0              | -5.463336               | 1.754472  | -2.072713 |
| 40               | 1                | 0              | -6.760781               | 3.432937  | -1.011449 |
| 41               | 6                | 0              | -8.452077               | 2.248914  | -0.384504 |
| 42               | 1                | 0              | -3.968442               | -1.003442 | 1.103978  |
| 43               | 1                | 0              | -4.684278               | -0.864998 | -1.860654 |
| 44               | 1                | 0              | -3.726852               | 0.378859  | -1.076626 |
| 45               | 8                | 0              | -6.142735               | 3.075756  | 1.621031  |
| 46               | 1                | 0              | -8.823373               | 2.992060  | 0.326718  |
| 47               | 1                | 0              | -8.990625               | 2.375381  | -1.328458 |
| 48               | 1                | 0              | -8.684511               | 1.253260  | 0.008502  |
| 49               | 1                | 0              | 1.223032                | -1.071391 | -1.607652 |
| 50               | 6                | 0              | 2.965324                | 0.015516  | -1.039797 |
| 51               | 6                | 0              | 3.305921                | -0.007574 | -2.542715 |

|    |   |   |           |           |           |
|----|---|---|-----------|-----------|-----------|
| 52 | 6 | 0 | 3.323977  | 1.408844  | -0.449934 |
| 53 | 1 | 0 | 4.375695  | 0.115934  | -2.733166 |
| 54 | 1 | 0 | 3.004255  | -0.948752 | -3.009527 |
| 55 | 1 | 0 | 2.783071  | 0.808279  | -3.055479 |
| 56 | 6 | 0 | 4.798811  | 1.817399  | -0.534125 |
| 57 | 6 | 0 | 5.054937  | 3.215738  | -0.011045 |
| 58 | 8 | 0 | 4.210660  | 4.066806  | 0.205096  |
| 59 | 8 | 0 | 6.375918  | 3.430615  | 0.173714  |
| 60 | 6 | 0 | 6.757463  | 4.746592  | 0.629740  |
| 61 | 6 | 0 | 4.647995  | -2.052923 | -0.934101 |
| 62 | 1 | 0 | 4.185167  | -0.706390 | 0.629031  |
| 63 | 6 | 0 | 4.308333  | -3.127788 | -1.660961 |
| 64 | 6 | 0 | 6.098983  | -1.653931 | -0.799478 |
| 65 | 1 | 0 | 5.064793  | -3.721224 | -2.167510 |
| 66 | 1 | 0 | 3.281130  | -3.456412 | -1.790758 |
| 67 | 1 | 0 | 6.759068  | -2.362107 | -1.307901 |
| 68 | 1 | 0 | 6.283112  | -0.659617 | -1.223298 |
| 69 | 1 | 0 | 6.389346  | -1.605601 | 0.257337  |
| 70 | 1 | 0 | 5.165805  | 1.809412  | -1.568424 |
| 71 | 1 | 0 | 5.450027  | 1.135715  | 0.021334  |
| 72 | 1 | 0 | 3.007025  | 1.442421  | 0.594279  |
| 73 | 1 | 0 | 2.733621  | 2.166603  | -0.975842 |
| 74 | 8 | 0 | 3.991070  | -2.648631 | 2.214728  |
| 75 | 1 | 0 | 2.090297  | -3.298990 | 2.196659  |
| 76 | 6 | 0 | 1.242892  | -0.353307 | 2.872656  |
| 77 | 1 | 0 | 0.341345  | -0.956654 | 3.022478  |
| 78 | 1 | 0 | 2.111317  | -0.896528 | 3.262987  |
| 79 | 1 | 0 | 1.143030  | 0.579970  | 3.432022  |
| 80 | 6 | 0 | -4.910250 | -2.660445 | 0.150067  |
| 81 | 1 | 0 | -5.911727 | -2.349164 | 0.462918  |
| 82 | 1 | 0 | -5.010248 | -3.142195 | -0.828922 |
| 83 | 1 | 0 | -4.580579 | -3.418164 | 0.865389  |
| 84 | 1 | 0 | 7.842970  | 4.719594  | 0.714444  |
| 85 | 1 | 0 | 6.447272  | 5.503978  | -0.093550 |
| 86 | 1 | 0 | 6.301909  | 4.959152  | 1.599218  |

---

| Center<br>Number | Atomic<br>Number | Atomic<br>Type | Coordinates (Angstroms) |           |           |
|------------------|------------------|----------------|-------------------------|-----------|-----------|
|                  |                  |                | X                       | Y         | Z         |
| 1                | 6                | 0              | -1.094100               | 0.178121  | -1.129191 |
| 2                | 6                | 0              | 0.299561                | 0.835866  | -1.029719 |
| 3                | 1                | 0              | -1.118530               | -0.377072 | -2.070876 |
| 4                | 1                | 0              | -1.853996               | 0.963579  | -1.210417 |
| 5                | 1                | 0              | 0.348517                | 1.539399  | -0.193533 |
| 6                | 1                | 0              | 0.479439                | 1.413177  | -1.944874 |
| 7                | 6                | 0              | 3.554849                | -1.112721 | -0.170938 |
| 8                | 6                | 0              | 2.390164                | -2.022287 | 0.332407  |
| 9                | 6                | 0              | 1.173257                | -1.037061 | 0.444362  |
| 10               | 6                | 0              | 1.357732                | -0.256792 | -0.876794 |
| 11               | 6                | 0              | 2.807987                | -2.803491 | 1.554954  |
| 12               | 1                | 0              | 2.107177                | -2.760519 | -0.423339 |
| 13               | 8                | 0              | 1.353979                | -0.080960 | 1.511106  |
| 14               | 6                | 0              | -2.072931               | -3.059393 | 0.709989  |
| 15               | 6                | 0              | -2.539752               | -1.908286 | -0.241454 |
| 16               | 6                | 0              | -1.438024               | -0.766203 | 0.060945  |
| 17               | 6                | 0              | -0.218580               | -1.630026 | 0.465732  |
| 18               | 6                | 0              | -0.588111               | -2.861198 | 0.834477  |
| 19               | 1                | 0              | -2.550774               | -2.982379 | 1.698798  |
| 20               | 1                | 0              | -2.334351               | -4.049798 | 0.319936  |
| 21               | 6                | 0              | -2.413077               | -2.438259 | -1.688172 |
| 22               | 6                | 0              | -1.843418               | 0.111556  | 1.274052  |
| 23               | 1                | 0              | 0.083341                | -3.633692 | 1.195212  |
| 24               | 1                | 0              | -2.720664               | -1.707100 | -2.440321 |
| 25               | 1                | 0              | -1.381925               | -2.730409 | -1.909601 |
| 26               | 1                | 0              | -3.037845               | -3.326616 | -1.820728 |
| 27               | 1                | 0              | -1.025577               | 0.782926  | 1.543549  |
| 28               | 1                | 0              | -2.718247               | 0.728323  | 1.050044  |
| 29               | 1                | 0              | -2.077221               | -0.494648 | 2.154681  |
| 30               | 6                | 0              | -4.024463               | -1.510816 | 0.067042  |
| 31               | 6                | 0              | -4.570184               | -0.402095 | -0.864388 |
| 32               | 6                | 0              | -5.879955               | 0.248503  | -0.414853 |
| 33               | 6                | 0              | -6.345344               | 1.419746  | -1.304116 |
| 34               | 6                | 0              | -5.794025               | 2.666023  | -0.594383 |
| 35               | 6                | 0              | -5.672841               | 2.200332  | 0.852735  |
| 36               | 8                | 0              | -5.715632               | 0.848813  | 0.915928  |
| 37               | 1                | 0              | -6.665164               | -0.499550 | -0.292923 |
| 38               | 1                | 0              | -7.439773               | 1.461005  | -1.329697 |
| 39               | 1                | 0              | -5.988226               | 1.317983  | -2.331880 |
| 40               | 1                | 0              | -4.763702               | 2.859994  | -0.925338 |
| 41               | 6                | 0              | -6.609720               | 3.950244  | -0.751196 |
| 42               | 1                | 0              | -4.040965               | -1.118442 | 1.088876  |
| 43               | 1                | 0              | -4.758351               | -0.817204 | -1.863131 |
| 44               | 1                | 0              | -3.826615               | 0.389514  | -0.998021 |
| 45               | 8                | 0              | -5.540391               | 2.880733  | 1.849142  |
| 46               | 1                | 0              | -6.177559               | 4.758008  | -0.154453 |
| 47               | 1                | 0              | -6.624472               | 4.265351  | -1.798972 |
| 48               | 1                | 0              | -7.644145               | 3.799305  | -0.424808 |
| 49               | 1                | 0              | 1.140565                | -1.000625 | -1.657066 |
| 50               | 6                | 0              | 2.878554                | 0.061514  | -1.025156 |
| 51               | 6                | 0              | 3.259810                | 0.067475  | -2.519772 |

|    |   |   |           |           |           |
|----|---|---|-----------|-----------|-----------|
| 52 | 6 | 0 | 3.223206  | 1.449802  | -0.415711 |
| 53 | 1 | 0 | 4.343191  | 0.072648  | -2.668846 |
| 54 | 1 | 0 | 2.858066  | -0.800197 | -3.049863 |
| 55 | 1 | 0 | 2.851758  | 0.961247  | -3.006082 |
| 56 | 6 | 0 | 4.694355  | 1.872864  | -0.516378 |
| 57 | 6 | 0 | 4.948927  | 3.249383  | 0.060356  |
| 58 | 8 | 0 | 4.114341  | 4.122833  | 0.219055  |
| 59 | 8 | 0 | 6.254074  | 3.419507  | 0.364086  |
| 60 | 6 | 0 | 6.634574  | 4.718043  | 0.869216  |
| 61 | 6 | 0 | 4.691994  | -1.911361 | -0.800841 |
| 62 | 1 | 0 | 3.974729  | -0.631673 | 0.719501  |
| 63 | 6 | 0 | 5.963272  | -1.697252 | -0.427012 |
| 64 | 6 | 0 | 4.367318  | -3.004436 | -1.797634 |
| 65 | 1 | 0 | 6.785060  | -2.262086 | -0.859543 |
| 66 | 1 | 0 | 6.225671  | -0.959006 | 0.326122  |
| 67 | 1 | 0 | 5.274610  | -3.357441 | -2.295171 |
| 68 | 1 | 0 | 3.909806  | -3.867143 | -1.297507 |
| 69 | 1 | 0 | 3.662250  | -2.676565 | -2.566403 |
| 70 | 1 | 0 | 5.027573  | 1.917032  | -1.561313 |
| 71 | 1 | 0 | 5.366033  | 1.168682  | -0.019079 |
| 72 | 1 | 0 | 2.917542  | 1.461888  | 0.633063  |
| 73 | 1 | 0 | 2.618849  | 2.209091  | -0.922877 |
| 74 | 8 | 0 | 2.497221  | -3.962932 | 1.774873  |
| 75 | 1 | 0 | 3.478717  | -2.274275 | 2.261502  |
| 76 | 6 | 0 | 1.137540  | -0.506537 | 2.853521  |
| 77 | 1 | 0 | 1.016239  | 0.402832  | 3.447077  |
| 78 | 1 | 0 | 0.238113  | -1.121947 | 2.952124  |
| 79 | 1 | 0 | 1.996160  | -1.063905 | 3.248619  |
| 80 | 6 | 0 | -4.977167 | -2.726464 | 0.052104  |
| 81 | 1 | 0 | -5.972563 | -2.444813 | 0.409183  |
| 82 | 1 | 0 | -5.096713 | -3.142745 | -0.954426 |
| 83 | 1 | 0 | -4.625300 | -3.527627 | 0.706780  |
| 84 | 1 | 0 | 7.707784  | 4.656727  | 1.044321  |
| 85 | 1 | 0 | 6.409055  | 5.492802  | 0.133165  |
| 86 | 1 | 0 | 6.105238  | 4.933239  | 1.799919  |

---



| Center<br>Number | Atomic<br>Number | Atomic<br>Type | Coordinates (Angstroms) |           |           |
|------------------|------------------|----------------|-------------------------|-----------|-----------|
|                  |                  |                | X                       | Y         | Z         |
| 1                | 6                | 0              | -0.962705               | 0.069946  | -1.205386 |
| 2                | 6                | 0              | 0.424646                | 0.746052  | -1.198119 |
| 3                | 1                | 0              | -0.991068               | -0.586760 | -2.078919 |
| 4                | 1                | 0              | -1.731815               | 0.833946  | -1.364324 |
| 5                | 1                | 0              | 0.474235                | 1.541428  | -0.449349 |
| 6                | 1                | 0              | 0.589315                | 1.213709  | -2.176212 |
| 7                | 6                | 0              | 3.714922                | -1.103520 | -0.216479 |
| 8                | 6                | 0              | 2.574706                | -1.870883 | 0.507234  |
| 9                | 6                | 0              | 1.332378                | -0.920486 | 0.485857  |
| 10               | 6                | 0              | 1.493867                | -0.312220 | -0.924928 |
| 11               | 6                | 0              | 2.996765                | -2.463336 | 1.831499  |
| 12               | 1                | 0              | 2.263016                | -2.743837 | -0.082423 |
| 13               | 8                | 0              | 1.477259                | 0.172920  | 1.420265  |
| 14               | 6                | 0              | -1.889481               | -2.955182 | 0.985744  |
| 15               | 6                | 0              | -2.374796               | -1.921160 | -0.081679 |
| 16               | 6                | 0              | -1.286352               | -0.738726 | 0.086763  |
| 17               | 6                | 0              | -0.051428               | -1.533049 | 0.581676  |
| 18               | 6                | 0              | -0.408089               | -2.721801 | 1.080432  |
| 19               | 1                | 0              | -2.364509               | -2.779690 | 1.962936  |
| 20               | 1                | 0              | -2.136667               | -3.985449 | 0.705020  |
| 21               | 6                | 0              | -2.247327               | -2.603500 | -1.463403 |
| 22               | 6                | 0              | -1.701361               | 0.263737  | 1.195950  |
| 23               | 1                | 0              | 0.262407                | -3.451445 | 1.524280  |
| 24               | 1                | 0              | -2.573478               | -1.963029 | -2.286906 |
| 25               | 1                | 0              | -1.211724               | -2.897173 | -1.661329 |
| 26               | 1                | 0              | -2.854046               | -3.513502 | -1.495468 |
| 27               | 1                | 0              | -0.897025               | 0.979468  | 1.378363  |
| 28               | 1                | 0              | -2.593494               | 0.828678  | 0.912338  |
| 29               | 1                | 0              | -1.911731               | -0.244445 | 2.142392  |
| 30               | 6                | 0              | -3.863271               | -1.512063 | 0.190701  |
| 31               | 6                | 0              | -4.429374               | -0.522564 | -0.855950 |
| 32               | 6                | 0              | -5.719460               | 0.183566  | -0.460339 |
| 33               | 6                | 0              | -6.288228               | 1.142355  | -1.520330 |
| 34               | 6                | 0              | -6.947742               | 2.255961  | -0.689505 |
| 35               | 6                | 0              | -6.165489               | 2.199744  | 0.619568  |
| 36               | 8                | 0              | -5.470056               | 1.041800  | 0.705710  |
| 37               | 1                | 0              | -6.481962               | -0.535590 | -0.144033 |
| 38               | 1                | 0              | -6.986493               | 0.633948  | -2.190567 |
| 39               | 1                | 0              | -5.471374               | 1.549273  | -2.126483 |
| 40               | 1                | 0              | -6.797860               | 3.245820  | -1.130185 |
| 41               | 6                | 0              | -8.452312               | 2.053165  | -0.425841 |
| 42               | 1                | 0              | -3.878637               | -1.006124 | 1.161797  |
| 43               | 1                | 0              | -4.636496               | -1.052920 | -1.794924 |
| 44               | 1                | 0              | -3.696178               | 0.252959  | -1.094398 |
| 45               | 8                | 0              | -6.137325               | 3.028295  | 1.506670  |
| 46               | 1                | 0              | -8.831817               | 2.818152  | 0.257320  |
| 47               | 1                | 0              | -9.005600               | 2.125580  | -1.366912 |
| 48               | 1                | 0              | -8.656251               | 1.070753  | 0.013457  |
| 49               | 1                | 0              | 1.277782                | -1.150516 | -1.603979 |
| 50               | 6                | 0              | 3.009182                | -0.000690 | -1.137782 |
| 51               | 6                | 0              | 3.335891                | -0.131283 | -2.637638 |

|    |   |   |           |           |           |
|----|---|---|-----------|-----------|-----------|
| 52 | 6 | 0 | 3.348826  | 1.438589  | -0.656400 |
| 53 | 1 | 0 | 4.401637  | -0.006550 | -2.847452 |
| 54 | 1 | 0 | 3.044466  | -1.110058 | -3.027188 |
| 55 | 1 | 0 | 2.796277  | 0.635561  | -3.205583 |
| 56 | 6 | 0 | 4.827521  | 1.869263  | -0.796098 |
| 57 | 6 | 0 | 4.996151  | 3.303885  | -0.352453 |
| 58 | 8 | 0 | 4.842925  | 4.279574  | -1.068890 |
| 59 | 8 | 0 | 5.307342  | 3.396491  | 0.956771  |
| 60 | 6 | 0 | 5.433547  | 4.729488  | 1.498305  |
| 61 | 6 | 0 | 4.728349  | -2.024800 | -0.896315 |
| 62 | 1 | 0 | 4.265140  | -0.566748 | 0.562611  |
| 63 | 6 | 0 | 4.401807  | -3.172132 | -1.509259 |
| 64 | 6 | 0 | 6.169649  | -1.574072 | -0.846152 |
| 65 | 1 | 0 | 5.162060  | -3.788323 | -1.981703 |
| 66 | 1 | 0 | 3.382404  | -3.541076 | -1.576627 |
| 67 | 1 | 0 | 6.836246  | -2.310646 | -1.303102 |
| 68 | 1 | 0 | 6.311343  | -0.622199 | -1.371625 |
| 69 | 1 | 0 | 6.488501  | -1.413778 | 0.191218  |
| 70 | 1 | 0 | 5.153338  | 1.817690  | -1.837614 |
| 71 | 1 | 0 | 5.475434  | 1.232133  | -0.189657 |
| 72 | 1 | 0 | 3.048714  | 1.538676  | 0.388962  |
| 73 | 1 | 0 | 2.740550  | 2.143779  | -1.234643 |
| 74 | 8 | 0 | 4.119138  | -2.385298 | 2.301341  |
| 75 | 1 | 0 | 2.220051  | -3.037862 | 2.373117  |
| 76 | 6 | 0 | 1.336671  | -0.101428 | 2.811512  |
| 77 | 1 | 0 | 0.481597  | -0.754040 | 3.017613  |
| 78 | 1 | 0 | 2.245075  | -0.548022 | 3.232013  |
| 79 | 1 | 0 | 1.171993  | 0.862790  | 3.298590  |
| 80 | 6 | 0 | -4.796975 | -2.735476 | 0.319635  |
| 81 | 1 | 0 | -5.800792 | -2.427539 | 0.628357  |
| 82 | 1 | 0 | -4.899613 | -3.275789 | -0.628060 |
| 83 | 1 | 0 | -4.441681 | -3.443107 | 1.073059  |
| 84 | 1 | 0 | 5.672530  | 4.591836  | 2.551865  |
| 85 | 1 | 0 | 6.234592  | 5.270315  | 0.989872  |
| 86 | 1 | 0 | 4.494413  | 5.275176  | 1.384623  |

---

| Center<br>Number | Atomic<br>Number | Atomic<br>Type | Coordinates (Angstroms) |           |           |
|------------------|------------------|----------------|-------------------------|-----------|-----------|
|                  |                  |                | X                       | Y         | Z         |
| 1                | 6                | 0              | -1.022269               | 0.154088  | -1.108603 |
| 2                | 6                | 0              | 0.360779                | 0.825176  | -0.967448 |
| 3                | 1                | 0              | -1.030654               | -0.361877 | -2.072503 |
| 4                | 1                | 0              | -1.791847               | 0.932236  | -1.164147 |
| 5                | 1                | 0              | 0.390015                | 1.490568  | -0.099801 |
| 6                | 1                | 0              | 0.539940                | 1.445321  | -1.854405 |
| 7                | 6                | 0              | 3.635613                | -1.126058 | -0.178341 |
| 8                | 6                | 0              | 2.477338                | -2.060660 | 0.280856  |
| 9                | 6                | 0              | 1.247414                | -1.099707 | 0.431213  |
| 10               | 6                | 0              | 1.433280                | -0.258767 | -0.851196 |
| 11               | 6                | 0              | 2.899823                | -2.905414 | 1.461293  |
| 12               | 1                | 0              | 2.194679                | -2.761886 | -0.507975 |
| 13               | 8                | 0              | 1.406055                | -0.190984 | 1.541655  |
| 14               | 6                | 0              | -1.977585               | -3.169786 | 0.578921  |
| 15               | 6                | 0              | -2.451633               | -1.981666 | -0.321699 |
| 16               | 6                | 0              | -1.363739               | -0.842799 | 0.037991  |
| 17               | 6                | 0              | -0.137907               | -1.710078 | 0.413980  |
| 18               | 6                | 0              | -0.496170               | -2.960644 | 0.723886  |
| 19               | 1                | 0              | -2.462991               | -3.145200 | 1.566662  |
| 20               | 1                | 0              | -2.224576               | -4.144023 | 0.141383  |
| 21               | 6                | 0              | -2.311471               | -2.444700 | -1.790187 |
| 22               | 6                | 0              | -1.787957               | -0.021898 | 1.283943  |
| 23               | 1                | 0              | 0.182514                | -3.739743 | 1.055255  |
| 24               | 1                | 0              | -2.618338               | -1.681985 | -2.510590 |
| 25               | 1                | 0              | -1.276943               | -2.720419 | -2.017037 |
| 26               | 1                | 0              | -2.929275               | -3.330075 | -1.967266 |
| 27               | 1                | 0              | -0.976569               | 0.640189  | 1.592680  |
| 28               | 1                | 0              | -2.664138               | 0.599332  | 1.077441  |
| 29               | 1                | 0              | -2.027569               | -0.668117 | 2.134108  |
| 30               | 6                | 0              | -3.942590               | -1.613271 | -0.006029 |
| 31               | 6                | 0              | -4.495823               | -0.476781 | -0.899392 |
| 32               | 6                | 0              | -5.801061               | 0.161754  | -0.420632 |
| 33               | 6                | 0              | -6.282759               | 1.344694  | -1.285292 |
| 34               | 6                | 0              | -5.719495               | 2.580987  | -0.567720 |
| 35               | 6                | 0              | -5.577010               | 2.095625  | 0.871021  |
| 36               | 8                | 0              | -5.618870               | 0.743352  | 0.916300  |
| 37               | 1                | 0              | -6.581953               | -0.590656 | -0.297704 |
| 38               | 1                | 0              | -7.377482               | 1.385640  | -1.291084 |
| 39               | 1                | 0              | -5.943631               | 1.257571  | -2.320449 |
| 40               | 1                | 0              | -4.693887               | 2.777837  | -0.911598 |
| 41               | 6                | 0              | -6.535315               | 3.868286  | -0.695441 |
| 42               | 1                | 0              | -3.969639               | -1.260226 | 1.029824  |
| 43               | 1                | 0              | -4.692211               | -0.863160 | -1.908038 |
| 44               | 1                | 0              | -3.753111               | 0.318310  | -1.016219 |
| 45               | 8                | 0              | -5.429379               | 2.762590  | 1.874377  |
| 46               | 1                | 0              | -6.093710               | 4.667282  | -0.093780 |
| 47               | 1                | 0              | -6.564312               | 4.197853  | -1.738473 |
| 48               | 1                | 0              | -7.565305               | 3.714282  | -0.356766 |
| 49               | 1                | 0              | 1.238847                | -0.967941 | -1.668716 |
| 50               | 6                | 0              | 2.952303                | 0.092571  | -0.964739 |
| 51               | 6                | 0              | 3.335175                | 0.155681  | -2.455332 |

|    |   |   |           |           |           |
|----|---|---|-----------|-----------|-----------|
| 52 | 6 | 0 | 3.237620  | 1.460350  | -0.282953 |
| 53 | 1 | 0 | 4.396958  | 0.364889  | -2.612093 |
| 54 | 1 | 0 | 3.112772  | -0.786684 | -2.963710 |
| 55 | 1 | 0 | 2.766464  | 0.950169  | -2.952424 |
| 56 | 6 | 0 | 4.710597  | 1.926467  | -0.249763 |
| 57 | 6 | 0 | 4.819153  | 3.259978  | 0.453245  |
| 58 | 8 | 0 | 4.938073  | 3.407906  | 1.657991  |
| 59 | 8 | 0 | 4.737285  | 4.294632  | -0.409260 |
| 60 | 6 | 0 | 4.778867  | 5.619279  | 0.165796  |
| 61 | 6 | 0 | 4.772809  | -1.868163 | -0.880957 |
| 62 | 1 | 0 | 4.066799  | -0.697778 | 0.736343  |
| 63 | 6 | 0 | 4.603161  | -3.003952 | -1.575360 |
| 64 | 6 | 0 | 6.157915  | -1.276782 | -0.739252 |
| 65 | 1 | 0 | 5.448327  | -3.494819 | -2.050325 |
| 66 | 1 | 0 | 3.640088  | -3.486543 | -1.704150 |
| 67 | 1 | 0 | 6.913050  | -1.928513 | -1.186786 |
| 68 | 1 | 0 | 6.234739  | -0.296867 | -1.223142 |
| 69 | 1 | 0 | 6.415873  | -1.128817 | 0.317197  |
| 70 | 1 | 0 | 5.117788  | 2.023507  | -1.259032 |
| 71 | 1 | 0 | 5.324024  | 1.221770  | 0.315148  |
| 72 | 1 | 0 | 2.861817  | 1.422288  | 0.741746  |
| 73 | 1 | 0 | 2.656310  | 2.225673  | -0.810593 |
| 74 | 8 | 0 | 2.531529  | -4.050878 | 1.661500  |
| 75 | 1 | 0 | 3.626367  | -2.435508 | 2.155879  |
| 76 | 6 | 0 | 1.215069  | -0.693614 | 2.860646  |
| 77 | 1 | 0 | 0.312027  | -1.306793 | 2.942047  |
| 78 | 1 | 0 | 2.077087  | -1.280153 | 3.202973  |
| 79 | 1 | 0 | 1.116002  | 0.180214  | 3.508902  |
| 80 | 6 | 0 | -4.880924 | -2.838072 | -0.074531 |
| 81 | 1 | 0 | -5.886558 | -2.577517 | 0.269852  |
| 82 | 1 | 0 | -4.975452 | -3.226130 | -1.094821 |
| 83 | 1 | 0 | -4.532953 | -3.653748 | 0.564148  |
| 84 | 1 | 0 | 4.701102  | 6.303184  | -0.678190 |
| 85 | 1 | 0 | 3.942604  | 5.760263  | 0.853897  |
| 86 | 1 | 0 | 5.720114  | 5.771112  | 0.698289  |

---

| Center<br>Number | Atomic<br>Number | Atomic<br>Type | Coordinates (Angstroms) |           |           |
|------------------|------------------|----------------|-------------------------|-----------|-----------|
|                  |                  |                | X                       | Y         | Z         |
| 1                | 6                | 0              | -0.812630               | 0.147664  | -1.064948 |
| 2                | 6                | 0              | 0.550428                | 0.834714  | -0.828155 |
| 3                | 1                | 0              | -0.774809               | -0.294389 | -2.064415 |
| 4                | 1                | 0              | -1.597094               | 0.912398  | -1.092279 |
| 5                | 1                | 0              | 0.537548                | 1.442207  | 0.082111  |
| 6                | 1                | 0              | 0.735517                | 1.511525  | -1.669801 |
| 7                | 6                | 0              | 3.823837                | -1.076150 | 0.031229  |
| 8                | 6                | 0              | 2.684351                | -2.098180 | 0.296492  |
| 9                | 6                | 0              | 1.424492                | -1.171697 | 0.454379  |
| 10               | 6                | 0              | 1.648514                | -0.228587 | -0.750075 |
| 11               | 6                | 0              | 3.046853                | -3.032029 | 1.426289  |
| 12               | 1                | 0              | 2.487861                | -2.728015 | -0.576624 |
| 13               | 8                | 0              | 1.513569                | -0.338205 | 1.630644  |
| 14               | 6                | 0              | -1.748347               | -3.317858 | 0.314057  |
| 15               | 6                | 0              | -2.223570               | -2.067967 | -0.498429 |
| 16               | 6                | 0              | -1.173524               | -0.940731 | -0.012338 |
| 17               | 6                | 0              | 0.058264                | -1.809009 | 0.335686  |
| 18               | 6                | 0              | -0.278337               | -3.089100 | 0.526747  |
| 19               | 1                | 0              | -2.265165               | -3.387991 | 1.283319  |
| 20               | 1                | 0              | -1.956096               | -4.256287 | -0.212853 |
| 21               | 6                | 0              | -2.028767               | -2.403600 | -1.995173 |
| 22               | 6                | 0              | -1.658409               | -0.228925 | 1.278047  |
| 23               | 1                | 0              | 0.407126                | -3.879565 | 0.814133  |
| 24               | 1                | 0              | -2.333290               | -1.590307 | -2.658968 |
| 25               | 1                | 0              | -0.981126               | -2.634836 | -2.211589 |
| 26               | 1                | 0              | -2.617052               | -3.285631 | -2.265589 |
| 27               | 1                | 0              | -0.878648               | 0.433066  | 1.659741  |
| 28               | 1                | 0              | -2.547907               | 0.379208  | 1.091419  |
| 29               | 1                | 0              | -1.901608               | -0.944245 | 2.069759  |
| 30               | 6                | 0              | -3.731809               | -1.761663 | -0.197702 |
| 31               | 6                | 0              | -4.283906               | -0.552426 | -0.989735 |
| 32               | 6                | 0              | -5.659029               | -0.048230 | -0.547863 |
| 33               | 6                | 0              | -6.131977               | 1.227221  | -1.274602 |
| 34               | 6                | 0              | -5.705700               | 2.367405  | -0.337050 |
| 35               | 6                | 0              | -5.657055               | 1.680148  | 1.023719  |
| 36               | 8                | 0              | -5.625718               | 0.335943  | 0.869860  |
| 37               | 1                | 0              | -6.403898               | -0.843250 | -0.608538 |
| 38               | 1                | 0              | -7.222670               | 1.219246  | -1.376750 |
| 39               | 1                | 0              | -5.700967               | 1.309874  | -2.275408 |
| 40               | 1                | 0              | -4.668276               | 2.660802  | -0.552819 |
| 41               | 6                | 0              | -6.583667               | 3.619694  | -0.352327 |
| 42               | 1                | 0              | -3.797648               | -1.512370 | 0.866490  |
| 43               | 1                | 0              | -4.379731               | -0.817259 | -2.050740 |
| 44               | 1                | 0              | -3.583343               | 0.287311  | -0.944371 |
| 45               | 8                | 0              | -5.632484               | 2.196598  | 2.121977  |
| 46               | 1                | 0              | -6.244450               | 4.339152  | 0.397792  |
| 47               | 1                | 0              | -6.542526               | 4.099997  | -1.334618 |
| 48               | 1                | 0              | -7.627852               | 3.368534  | -0.137999 |
| 49               | 1                | 0              | 1.497122                | -0.875911 | -1.626347 |
| 50               | 6                | 0              | 3.168538                | 0.138791  | -0.781907 |
| 51               | 6                | 0              | 3.634979                | 0.220774  | -2.247507 |

|    |   |   |           |           |           |
|----|---|---|-----------|-----------|-----------|
| 52 | 6 | 0 | 3.577929  | 1.436869  | -0.026043 |
| 53 | 1 | 0 | 4.703935  | 0.446699  | -2.320370 |
| 54 | 1 | 0 | 3.448797  | -0.713514 | -2.783377 |
| 55 | 1 | 0 | 3.088014  | 1.004651  | -2.781943 |
| 56 | 6 | 0 | 3.284906  | 2.782871  | -0.701089 |
| 57 | 6 | 0 | 3.796990  | 3.959234  | 0.104589  |
| 58 | 8 | 0 | 4.561813  | 3.903050  | 1.051097  |
| 59 | 8 | 0 | 3.308437  | 5.124153  | -0.374650 |
| 60 | 6 | 0 | 3.756785  | 6.330122  | 0.281363  |
| 61 | 6 | 0 | 5.109607  | -1.679365 | -0.519958 |
| 62 | 1 | 0 | 4.080877  | -0.659197 | 1.010511  |
| 63 | 6 | 0 | 6.297810  | -1.251377 | -0.063478 |
| 64 | 6 | 0 | 5.037712  | -2.792413 | -1.543164 |
| 65 | 1 | 0 | 7.232075  | -1.653315 | -0.447184 |
| 66 | 1 | 0 | 6.373681  | -0.488359 | 0.706815  |
| 67 | 1 | 0 | 6.034157  | -3.033959 | -1.922962 |
| 68 | 1 | 0 | 4.621713  | -3.706528 | -1.101574 |
| 69 | 1 | 0 | 4.401168  | -2.541362 | -2.397289 |
| 70 | 1 | 0 | 2.219360  | 2.945744  | -0.879228 |
| 71 | 1 | 0 | 3.768299  | 2.854811  | -1.683231 |
| 72 | 1 | 0 | 4.660722  | 1.386884  | 0.137863  |
| 73 | 1 | 0 | 3.115202  | 1.423080  | 0.964220  |
| 74 | 8 | 0 | 2.779806  | -4.222718 | 1.451784  |
| 75 | 1 | 0 | 3.635449  | -2.588276 | 2.253943  |
| 76 | 6 | 0 | 1.273563  | -0.928523 | 2.905584  |
| 77 | 1 | 0 | 1.013928  | -0.110435 | 3.581956  |
| 78 | 1 | 0 | 0.447933  | -1.646633 | 2.879038  |
| 79 | 1 | 0 | 2.169825  | -1.426110 | 3.296447  |
| 80 | 6 | 0 | -4.637459 | -2.993632 | -0.416048 |
| 81 | 1 | 0 | -5.647639 | -2.804964 | -0.040478 |
| 82 | 1 | 0 | -4.726001 | -3.255686 | -1.476393 |
| 83 | 1 | 0 | -4.265064 | -3.871928 | 0.116783  |
| 84 | 1 | 0 | 4.841696  | 6.426076  | 0.199337  |
| 85 | 1 | 0 | 3.259647  | 7.145657  | -0.242081 |
| 86 | 1 | 0 | 3.469605  | 6.318556  | 1.334902  |

---

| Center<br>Number | Atomic<br>Number | Atomic<br>Type | Coordinates (Angstroms) |           |           |
|------------------|------------------|----------------|-------------------------|-----------|-----------|
|                  |                  |                | X                       | Y         | Z         |
| 1                | 6                | 0              | 1.128249                | -0.292116 | -1.220647 |
| 2                | 6                | 0              | -0.220951               | -1.041688 | -1.196950 |
| 3                | 1                | 0              | 1.134610                | 0.325612  | -2.123044 |
| 4                | 1                | 0              | 1.938467                | -1.021108 | -1.334737 |
| 5                | 1                | 0              | -0.239629               | -1.794621 | -0.404061 |
| 6                | 1                | 0              | -0.340038               | -1.573260 | -2.149199 |
| 7                | 6                | 0              | -3.614687               | 0.660598  | -0.324808 |
| 8                | 6                | 0              | -2.516914               | 1.591224  | 0.270718  |
| 9                | 6                | 0              | -1.246166               | 0.677125  | 0.363591  |
| 10               | 6                | 0              | -1.352922               | -0.030564 | -1.004524 |
| 11               | 6                | 0              | -3.017087               | 2.287391  | 1.515595  |
| 12               | 1                | 0              | -2.242331               | 2.384925  | -0.428561 |
| 13               | 8                | 0              | -1.386193               | -0.351772 | 1.364641  |
| 14               | 6                | 0              | 1.865145                | 2.867595  | 0.847611  |
| 15               | 6                | 0              | 2.425280                | 1.809622  | -0.158518 |
| 16               | 6                | 0              | 1.385440                | 0.588871  | 0.037539  |
| 17               | 6                | 0              | 0.106214                | 1.351477  | 0.459428  |
| 18               | 6                | 0              | 0.391809                | 2.576797  | 0.913235  |
| 19               | 1                | 0              | 2.318623                | 2.755641  | 1.844502  |
| 20               | 1                | 0              | 2.078708                | 3.894211  | 0.527914  |
| 21               | 6                | 0              | 2.305156                | 2.422876  | -1.572757 |
| 22               | 6                | 0              | 1.813654                | -0.341972 | 1.202269  |
| 23               | 1                | 0              | -0.334462               | 3.284049  | 1.300274  |
| 24               | 1                | 0              | 2.671264                | 1.758106  | -2.359455 |
| 25               | 1                | 0              | 1.264328                | 2.669602  | -1.803679 |
| 26               | 1                | 0              | 2.880361                | 3.351728  | -1.633447 |
| 27               | 1                | 0              | 1.032902                | -1.078499 | 1.403950  |
| 28               | 1                | 0              | 2.733092                | -0.884432 | 0.965330  |
| 29               | 1                | 0              | 1.982169                | 0.219725  | 2.126512  |
| 30               | 6                | 0              | 3.922923                | 1.478378  | 0.166630  |
| 31               | 6                | 0              | 4.561456                | 0.486861  | -0.836132 |
| 32               | 6                | 0              | 5.851000                | -0.178659 | -0.374225 |
| 33               | 6                | 0              | 6.511086                | -1.104121 | -1.410381 |
| 34               | 6                | 0              | 7.160424                | -2.205865 | -0.556311 |
| 35               | 6                | 0              | 6.303502                | -2.193193 | 0.706367  |
| 36               | 8                | 0              | 5.566231                | -1.060133 | 0.766501  |
| 37               | 1                | 0              | 6.568868                | 0.561639  | -0.006276 |
| 38               | 1                | 0              | 7.227624                | -0.563837 | -2.034904 |
| 39               | 1                | 0              | 5.743659                | -1.530482 | -2.065824 |
| 40               | 1                | 0              | 7.069637                | -3.194229 | -1.016048 |
| 41               | 6                | 0              | 8.640123                | -1.956969 | -0.205019 |
| 42               | 1                | 0              | 3.936211                | 1.003629  | 1.153420  |
| 43               | 1                | 0              | 4.795278                | 1.009182  | -1.773447 |
| 44               | 1                | 0              | 3.861119                | -0.312331 | -1.095009 |
| 45               | 8                | 0              | 6.252032                | -3.035381 | 1.579650  |
| 46               | 1                | 0              | 9.006156                | -2.718932 | 0.488827  |
| 47               | 1                | 0              | 9.248016                | -1.997463 | -1.113831 |
| 48               | 1                | 0              | 8.785964                | -0.975013 | 0.257834  |
| 49               | 1                | 0              | -1.172244               | 0.770431  | -1.735943 |
| 50               | 6                | 0              | -2.849828               | -0.440753 | -1.206766 |
| 51               | 6                | 0              | -3.173563               | -0.358233 | -2.710833 |

|    |   |   |           |           |           |
|----|---|---|-----------|-----------|-----------|
| 52 | 6 | 0 | -3.080273 | -1.894562 | -0.697534 |
| 53 | 1 | 0 | -4.213513 | -0.609831 | -2.936937 |
| 54 | 1 | 0 | -2.992825 | 0.646348  | -3.102755 |
| 55 | 1 | 0 | -2.538753 | -1.058291 | -3.266816 |
| 56 | 6 | 0 | -4.477205 | -2.525989 | -0.840853 |
| 57 | 6 | 0 | -5.397702 | -2.373142 | 0.353815  |
| 58 | 8 | 0 | -5.078296 | -1.993911 | 1.466421  |
| 59 | 8 | 0 | -6.651985 | -2.767915 | 0.046757  |
| 60 | 6 | 0 | -7.618091 | -2.748065 | 1.120168  |
| 61 | 6 | 0 | -4.755812 | 1.423565  | -0.996097 |
| 62 | 1 | 0 | -4.054992 | 0.120746  | 0.520737  |
| 63 | 6 | 0 | -4.613847 | 2.622551  | -1.581850 |
| 64 | 6 | 0 | -6.117132 | 0.768288  | -0.944401 |
| 65 | 1 | 0 | -5.464145 | 3.120978  | -2.039775 |
| 66 | 1 | 0 | -3.668189 | 3.151950  | -1.633920 |
| 67 | 1 | 0 | -6.421153 | 0.588810  | 0.094352  |
| 68 | 1 | 0 | -6.878416 | 1.391428  | -1.421346 |
| 69 | 1 | 0 | -6.120754 | -0.205097 | -1.446688 |
| 70 | 1 | 0 | -4.363966 | -3.611612 | -0.965118 |
| 71 | 1 | 0 | -5.013616 | -2.200099 | -1.736545 |
| 72 | 1 | 0 | -2.776768 | -1.956710 | 0.348983  |
| 73 | 1 | 0 | -2.392256 | -2.533857 | -1.260922 |
| 74 | 8 | 0 | -2.712320 | 3.422167  | 1.845123  |
| 75 | 1 | 0 | -3.741169 | 1.716197  | 2.131553  |
| 76 | 6 | 0 | -1.279693 | 0.018931  | 2.734809  |
| 77 | 1 | 0 | -0.436198 | 0.693113  | 2.915486  |
| 78 | 1 | 0 | -2.200560 | 0.489383  | 3.101780  |
| 79 | 1 | 0 | -1.124780 | -0.908007 | 3.292086  |
| 80 | 6 | 0 | 4.797855  | 2.745490  | 0.280918  |
| 81 | 1 | 0 | 5.812307  | 2.489176  | 0.602591  |
| 82 | 1 | 0 | 4.884341  | 3.272937  | -0.675559 |
| 83 | 1 | 0 | 4.403733  | 3.448758  | 1.018945  |
| 84 | 1 | 0 | -7.737819 | -1.733343 | 1.505650  |
| 85 | 1 | 0 | -8.548457 | -3.101352 | 0.677717  |
| 86 | 1 | 0 | -7.300808 | -3.410833 | 1.928145  |

---



| Center<br>Number | Atomic<br>Number | Atomic<br>Type | Coordinates (Angstroms) |           |           |
|------------------|------------------|----------------|-------------------------|-----------|-----------|
|                  |                  |                | X                       | Y         | Z         |
| 1                | 6                | 0              | -0.962403               | 0.535103  | -0.821939 |
| 2                | 6                | 0              | 0.377817                | 1.122599  | -0.332078 |
| 3                | 1                | 0              | -0.850649               | 0.330634  | -1.890150 |
| 4                | 1                | 0              | -1.742969               | 1.298995  | -0.731279 |
| 5                | 1                | 0              | 0.294207                | 1.497556  | 0.692184  |
| 6                | 1                | 0              | 0.636772                | 1.978912  | -0.966841 |
| 7                | 6                | 0              | 3.600959                | -0.998091 | 0.189879  |
| 8                | 6                | 0              | 2.423673                | -2.017820 | 0.224511  |
| 9                | 6                | 0              | 1.159426                | -1.140035 | 0.518578  |
| 10               | 6                | 0              | 1.459524                | 0.045381  | -0.425588 |
| 11               | 6                | 0              | 2.742678                | -3.180522 | 1.137008  |
| 12               | 1                | 0              | 2.244261                | -2.450099 | -0.762882 |
| 13               | 8                | 0              | 1.170276                | -0.610666 | 1.862540  |
| 14               | 6                | 0              | -2.005197               | -3.135281 | -0.326907 |
| 15               | 6                | 0              | -2.411403               | -1.727281 | -0.874795 |
| 16               | 6                | 0              | -1.400023               | -0.757573 | -0.071130 |
| 17               | 6                | 0              | -0.198906               | -1.707118 | 0.163623  |
| 18               | 6                | 0              | -0.554885               | -2.990190 | 0.039442  |
| 19               | 1                | 0              | -2.595162               | -3.408858 | 0.561362  |
| 20               | 1                | 0              | -2.175489               | -3.929760 | -1.062751 |
| 21               | 6                | 0              | -2.100930               | -1.726353 | -2.389132 |
| 22               | 6                | 0              | -1.979162               | -0.347694 | 1.308569  |
| 23               | 1                | 0              | 0.104061                | -3.838447 | 0.193460  |
| 24               | 1                | 0              | -2.354779               | -0.781862 | -2.877316 |
| 25               | 1                | 0              | -1.039481               | -1.921183 | -2.570541 |
| 26               | 1                | 0              | -2.666265               | -2.517030 | -2.891298 |
| 27               | 1                | 0              | -1.226256               | 0.187875  | 1.890328  |
| 28               | 1                | 0              | -2.846377               | 0.309710  | 1.200801  |
| 29               | 1                | 0              | -2.289590               | -1.218832 | 1.893609  |
| 30               | 6                | 0              | -3.937811               | -1.464098 | -0.628151 |
| 31               | 6                | 0              | -4.421624               | -0.095838 | -1.164602 |
| 32               | 6                | 0              | -5.818062               | 0.333064  | -0.709943 |
| 33               | 6                | 0              | -6.224199               | 1.750959  | -1.161599 |
| 34               | 6                | 0              | -5.857462               | 2.641146  | 0.035949  |
| 35               | 6                | 0              | -5.911760               | 1.665293  | 1.206951  |
| 36               | 8                | 0              | -5.879041               | 0.389531  | 0.756542  |
| 37               | 1                | 0              | -6.565872               | -0.408045 | -0.996463 |
| 38               | 1                | 0              | -7.304257               | 1.794579  | -1.339182 |
| 39               | 1                | 0              | -5.719079               | 2.044121  | -2.085277 |
| 40               | 1                | 0              | -4.805021               | 2.950828  | -0.036512 |
| 41               | 6                | 0              | -6.722224               | 3.885500  | 0.243056  |
| 42               | 1                | 0              | -4.085845               | -1.462369 | 0.456634  |
| 43               | 1                | 0              | -4.449299               | -0.116400 | -2.261729 |
| 44               | 1                | 0              | -3.716996               | 0.695447  | -0.890686 |
| 45               | 8                | 0              | -5.962385               | 1.921326  | 2.392468  |
| 46               | 1                | 0              | -6.429265               | 4.413839  | 1.154370  |
| 47               | 1                | 0              | -6.610924               | 4.570273  | -0.603169 |
| 48               | 1                | 0              | -7.780470               | 3.616893  | 0.328286  |
| 49               | 1                | 0              | 1.369963                | -0.387545 | -1.432337 |
| 50               | 6                | 0              | 2.973473                | 0.405008  | -0.267809 |
| 51               | 6                | 0              | 3.505201                | 0.897446  | -1.626392 |

|    |   |   |           |           |           |
|----|---|---|-----------|-----------|-----------|
| 52 | 6 | 0 | 3.148725  | 1.502293  | 0.820336  |
| 53 | 1 | 0 | 4.574866  | 1.121844  | -1.606740 |
| 54 | 1 | 0 | 3.351300  | 0.146921  | -2.406904 |
| 55 | 1 | 0 | 2.977834  | 1.810465  | -1.925026 |
| 56 | 6 | 0 | 4.575890  | 1.961917  | 1.186904  |
| 57 | 6 | 0 | 5.291844  | 2.864070  | 0.204028  |
| 58 | 8 | 0 | 6.438344  | 2.705779  | -0.183801 |
| 59 | 8 | 0 | 4.533458  | 3.913925  | -0.169396 |
| 60 | 6 | 0 | 5.139520  | 4.860567  | -1.075756 |
| 61 | 6 | 0 | 4.821870  | -1.514593 | -0.573519 |
| 62 | 1 | 0 | 3.924073  | -0.863457 | 1.230918  |
| 63 | 6 | 0 | 4.745047  | -2.375590 | -1.600207 |
| 64 | 6 | 0 | 6.173439  | -1.030654 | -0.098155 |
| 65 | 1 | 0 | 5.644377  | -2.717855 | -2.105087 |
| 66 | 1 | 0 | 3.807868  | -2.766877 | -1.981960 |
| 67 | 1 | 0 | 6.982838  | -1.538528 | -0.629744 |
| 68 | 1 | 0 | 6.302218  | 0.046880  | -0.248426 |
| 69 | 1 | 0 | 6.300271  | -1.218479 | 0.976100  |
| 70 | 1 | 0 | 5.238648  | 1.121016  | 1.395208  |
| 71 | 1 | 0 | 4.503270  | 2.540557  | 2.117261  |
| 72 | 1 | 0 | 2.683347  | 1.136823  | 1.737932  |
| 73 | 1 | 0 | 2.580431  | 2.386279  | 0.514035  |
| 74 | 8 | 0 | 2.384081  | -4.330706 | 0.946995  |
| 75 | 1 | 0 | 3.382280  | -2.945909 | 2.013049  |
| 76 | 6 | 0 | 0.852086  | -1.490780 | 2.936240  |
| 77 | 1 | 0 | 0.654256  | -0.856481 | 3.803653  |
| 78 | 1 | 0 | -0.034004 | -2.097328 | 2.724307  |
| 79 | 1 | 0 | 1.689529  | -2.156819 | 3.180180  |
| 80 | 6 | 0 | -4.828121 | -2.594749 | -1.189252 |
| 81 | 1 | 0 | -5.867981 | -2.464102 | -0.874372 |
| 82 | 1 | 0 | -4.818106 | -2.619139 | -2.284843 |
| 83 | 1 | 0 | -4.513404 | -3.577226 | -0.828707 |
| 84 | 1 | 0 | 5.413316  | 4.367806  | -2.011181 |
| 85 | 1 | 0 | 4.378962  | 5.620209  | -1.251033 |
| 86 | 1 | 0 | 6.028736  | 5.304160  | -0.622745 |

---

| Center<br>Number | Atomic<br>Number | Atomic<br>Type | Coordinates (Angstroms) |           |           |
|------------------|------------------|----------------|-------------------------|-----------|-----------|
|                  |                  |                | X                       | Y         | Z         |
| 1                | 6                | 0              | -1.025670               | 0.533836  | -0.826773 |
| 2                | 6                | 0              | 0.320357                | 1.115285  | -0.346416 |
| 3                | 1                | 0              | -0.918525               | 0.318471  | -1.893260 |
| 4                | 1                | 0              | -1.800758               | 1.303672  | -0.741513 |
| 5                | 1                | 0              | 0.242634                | 1.504036  | 0.673062  |
| 6                | 1                | 0              | 0.587158                | 1.960651  | -0.991855 |
| 7                | 6                | 0              | 3.540018                | -1.044958 | 0.101984  |
| 8                | 6                | 0              | 2.348469                | -2.025361 | 0.296596  |
| 9                | 6                | 0              | 1.084295                | -1.136876 | 0.544108  |
| 10               | 6                | 0              | 1.390972                | 0.026548  | -0.424813 |
| 11               | 6                | 0              | 2.641843                | -3.139785 | 1.273115  |
| 12               | 1                | 0              | 2.132390                | -2.555561 | -0.640966 |
| 13               | 8                | 0              | 1.075981                | -0.572077 | 1.874800  |
| 14               | 6                | 0              | -2.098084               | -3.123308 | -0.291354 |
| 15               | 6                | 0              | -2.487363               | -1.719663 | -0.861083 |
| 16               | 6                | 0              | -1.472720               | -0.748361 | -0.063139 |
| 17               | 6                | 0              | -0.277733               | -1.702506 | 0.190345  |
| 18               | 6                | 0              | -0.649009               | -2.982539 | 0.080653  |
| 19               | 1                | 0              | -2.695628               | -3.379318 | 0.596900  |
| 20               | 1                | 0              | -2.269254               | -3.926450 | -1.017377 |
| 21               | 6                | 0              | -2.166457               | -1.742992 | -2.373119 |
| 22               | 6                | 0              | -2.055291               | -0.320891 | 1.309752  |
| 23               | 1                | 0              | -0.010119               | -3.844495 | 0.247177  |
| 24               | 1                | 0              | -2.411009               | -0.804494 | -2.876938 |
| 25               | 1                | 0              | -1.104930               | -1.946189 | -2.544786 |
| 26               | 1                | 0              | -2.733395               | -2.537456 | -2.867445 |
| 27               | 1                | 0              | -1.302739               | 0.220089  | 1.886473  |
| 28               | 1                | 0              | -2.920208               | 0.337327  | 1.190288  |
| 29               | 1                | 0              | -2.370419               | -1.183788 | 1.904533  |
| 30               | 6                | 0              | -4.013205               | -1.441373 | -0.628462 |
| 31               | 6                | 0              | -4.480536               | -0.073127 | -1.179029 |
| 32               | 6                | 0              | -5.886858               | 0.359895  | -0.760112 |
| 33               | 6                | 0              | -6.269816               | 1.785917  | -1.206110 |
| 34               | 6                | 0              | -5.930587               | 2.659124  | 0.011944  |
| 35               | 6                | 0              | -6.026156               | 1.670128  | 1.169017  |
| 36               | 8                | 0              | -5.990733               | 0.399178  | 0.704349  |
| 37               | 1                | 0              | -6.630801               | -0.372281 | -1.078015 |
| 38               | 1                | 0              | -7.344190               | 1.839585  | -1.413092 |
| 39               | 1                | 0              | -5.737202               | 2.086380  | -2.111832 |
| 40               | 1                | 0              | -4.874224               | 2.961384  | -0.026576 |
| 41               | 6                | 0              | -6.791460               | 3.907856  | 0.208939  |
| 42               | 1                | 0              | -4.169851               | -1.429071 | 0.455023  |
| 43               | 1                | 0              | -4.480898               | -0.094643 | -2.276473 |
| 44               | 1                | 0              | -3.780928               | 0.716389  | -0.888214 |
| 45               | 8                | 0              | -6.109120               | 1.912030  | 2.355584  |
| 46               | 1                | 0              | -6.521465               | 4.422633  | 1.134969  |
| 47               | 1                | 0              | -6.649570               | 4.601957  | -0.624988 |
| 48               | 1                | 0              | -7.853854               | 3.646851  | 0.259447  |
| 49               | 1                | 0              | 1.294795                | -0.427245 | -1.422866 |
| 50               | 6                | 0              | 2.905955                | 0.374903  | -0.286442 |
| 51               | 6                | 0              | 3.411051                | 0.938850  | -1.627184 |

|    |   |   |           |           |           |
|----|---|---|-----------|-----------|-----------|
| 52 | 6 | 0 | 3.136302  | 1.415195  | 0.847198  |
| 53 | 1 | 0 | 4.490583  | 1.117061  | -1.623505 |
| 54 | 1 | 0 | 3.205544  | 0.252947  | -2.452979 |
| 55 | 1 | 0 | 2.918632  | 1.892827  | -1.843417 |
| 56 | 6 | 0 | 4.583425  | 1.885170  | 1.087134  |
| 57 | 6 | 0 | 5.052809  | 3.006150  | 0.183373  |
| 58 | 8 | 0 | 4.372750  | 3.950897  | -0.177898 |
| 59 | 8 | 0 | 6.355962  | 2.873349  | -0.145126 |
| 60 | 6 | 0 | 6.932013  | 3.931266  | -0.942438 |
| 61 | 6 | 0 | 4.623353  | -1.599130 | -0.824631 |
| 62 | 1 | 0 | 4.008680  | -0.929622 | 1.084024  |
| 63 | 6 | 0 | 4.363949  | -2.301409 | -1.937631 |
| 64 | 6 | 0 | 6.051333  | -1.315153 | -0.420481 |
| 65 | 1 | 0 | 5.169771  | -2.670688 | -2.566295 |
| 66 | 1 | 0 | 3.356453  | -2.528786 | -2.274471 |
| 67 | 1 | 0 | 6.762860  | -1.799309 | -1.095234 |
| 68 | 1 | 0 | 6.264857  | -0.239474 | -0.426538 |
| 69 | 1 | 0 | 6.241733  | -1.671724 | 0.599312  |
| 70 | 1 | 0 | 5.304758  | 1.066196  | 1.054045  |
| 71 | 1 | 0 | 4.645055  | 2.300300  | 2.102378  |
| 72 | 1 | 0 | 2.758381  | 0.990831  | 1.778396  |
| 73 | 1 | 0 | 2.530945  | 2.303944  | 0.640072  |
| 74 | 8 | 0 | 3.705967  | -3.297814 | 1.847439  |
| 75 | 1 | 0 | 1.827903  | -3.875335 | 1.425684  |
| 76 | 6 | 0 | 0.767755  | -1.426828 | 2.972314  |
| 77 | 1 | 0 | 0.544994  | -0.770295 | 3.816932  |
| 78 | 1 | 0 | -0.105031 | -2.057277 | 2.771646  |
| 79 | 1 | 0 | 1.617886  | -2.062332 | 3.246862  |
| 80 | 6 | 0 | -4.908714 | -2.569235 | -1.186981 |
| 81 | 1 | 0 | -5.947144 | -2.434452 | -0.869575 |
| 82 | 1 | 0 | -4.901229 | -2.594430 | -2.282588 |
| 83 | 1 | 0 | -4.597202 | -3.552790 | -0.826505 |
| 84 | 1 | 0 | 6.411919  | 4.010999  | -1.899408 |
| 85 | 1 | 0 | 6.868844  | 4.883579  | -0.411419 |
| 86 | 1 | 0 | 7.971902  | 3.645140  | -1.093917 |

---

| Center<br>Number | Atomic<br>Number | Atomic<br>Type | Coordinates (Angstroms) |           |           |
|------------------|------------------|----------------|-------------------------|-----------|-----------|
|                  |                  |                | X                       | Y         | Z         |
| 1                | 6                | 0              | 1.135205                | 0.233063  | 1.189317  |
| 2                | 6                | 0              | -0.232972               | 0.952757  | 1.196936  |
| 3                | 1                | 0              | 1.196072                | -0.334151 | 2.121981  |
| 4                | 1                | 0              | 1.933070                | 0.982985  | 1.228689  |
| 5                | 1                | 0              | -0.299482               | 1.694088  | 0.395049  |
| 6                | 1                | 0              | -0.330395               | 1.493694  | 2.145955  |
| 7                | 6                | 0              | -3.616663               | -0.683614 | 0.332207  |
| 8                | 6                | 0              | -2.562647               | -1.689256 | -0.203722 |
| 9                | 6                | 0              | -1.266854               | -0.808867 | -0.305343 |
| 10               | 6                | 0              | -1.337597               | -0.095589 | 1.063375  |
| 11               | 6                | 0              | -3.057750               | -2.405207 | -1.440864 |
| 12               | 1                | 0              | -2.333904               | -2.466661 | 0.532632  |
| 13               | 8                | 0              | -1.395533               | 0.212269  | -1.315900 |
| 14               | 6                | 0              | 1.832059                | -3.021296 | -0.753621 |
| 15               | 6                | 0              | 2.401915                | -1.927440 | 0.208747  |
| 16               | 6                | 0              | 1.365030                | -0.711767 | -0.029968 |
| 17               | 6                | 0              | 0.079198                | -1.490923 | -0.404853 |
| 18               | 6                | 0              | 0.358357                | -2.731810 | -0.817152 |
| 19               | 1                | 0              | 2.278608                | -2.946944 | -1.757141 |
| 20               | 1                | 0              | 2.045571                | -4.035744 | -0.397807 |
| 21               | 6                | 0              | 2.285530                | -2.488188 | 1.644892  |
| 22               | 6                | 0              | 1.780964                | 0.160903  | -1.243438 |
| 23               | 1                | 0              | -0.373591               | -3.450878 | -1.170130 |
| 24               | 1                | 0              | 2.663240                | -1.800819 | 2.406080  |
| 25               | 1                | 0              | 1.244520                | -2.718280 | 1.891580  |
| 26               | 1                | 0              | 2.853900                | -3.418845 | 1.733685  |
| 27               | 1                | 0              | 1.007260                | 0.901288  | -1.456829 |
| 28               | 1                | 0              | 2.711993                | 0.700794  | -1.050061 |
| 29               | 1                | 0              | 1.922834                | -0.439954 | -2.147055 |
| 30               | 6                | 0              | 3.899817                | -1.617495 | -0.138048 |
| 31               | 6                | 0              | 4.541227                | -0.564334 | 0.796931  |
| 32               | 6                | 0              | 5.902993                | -0.027977 | 0.351631  |
| 33               | 6                | 0              | 6.473608                | 1.084995  | 1.254177  |
| 34               | 6                | 0              | 6.035915                | 2.385040  | 0.561972  |
| 35               | 6                | 0              | 5.866924                | 1.950290  | -0.890273 |
| 36               | 8                | 0              | 5.790646                | 0.601560  | -0.970862 |
| 37               | 1                | 0              | 6.617732                | -0.841572 | 0.218715  |
| 38               | 1                | 0              | 7.567275                | 1.026929  | 1.277077  |
| 39               | 1                | 0              | 6.110744                | 1.002591  | 2.281696  |
| 40               | 1                | 0              | 5.029338                | 2.669064  | 0.900877  |
| 41               | 6                | 0              | 6.966691                | 3.587063  | 0.730226  |
| 42               | 1                | 0              | 3.911776                | -1.206207 | -1.152737 |
| 43               | 1                | 0              | 4.692631                | -0.998581 | 1.793666  |
| 44               | 1                | 0              | 3.868431                | 0.288240  | 0.932423  |
| 45               | 8                | 0              | 5.790176                | 2.652976  | -1.877158 |
| 46               | 1                | 0              | 6.605706                | 4.440159  | 0.149491  |
| 47               | 1                | 0              | 7.017716                | 3.883033  | 1.782435  |
| 48               | 1                | 0              | 7.980680                | 3.347755  | 0.392771  |
| 49               | 1                | 0              | -1.070221               | -0.888680 | 1.775141  |
| 50               | 6                | 0              | -2.842829               | 0.229454  | 1.380492  |
| 51               | 6                | 0              | -3.109543               | -0.215922 | 2.836424  |

|    |   |   |           |           |           |
|----|---|---|-----------|-----------|-----------|
| 52 | 6 | 0 | -3.211273 | 1.739620  | 1.321429  |
| 53 | 1 | 0 | -4.139351 | -0.015266 | 3.147952  |
| 54 | 1 | 0 | -2.926839 | -1.286530 | 2.967968  |
| 55 | 1 | 0 | -2.443834 | 0.324497  | 3.520133  |
| 56 | 6 | 0 | -3.179390 | 2.481587  | -0.043225 |
| 57 | 6 | 0 | -4.523544 | 2.619587  | -0.723655 |
| 58 | 8 | 0 | -4.827161 | 2.143037  | -1.805234 |
| 59 | 8 | 0 | -5.378373 | 3.371237  | 0.004548  |
| 60 | 6 | 0 | -6.689479 | 3.592983  | -0.557267 |
| 61 | 6 | 0 | -4.922141 | -1.309788 | 0.802771  |
| 62 | 1 | 0 | -3.871852 | -0.040665 | -0.519237 |
| 63 | 6 | 0 | -5.050725 | -2.603875 | 1.133994  |
| 64 | 6 | 0 | -6.120077 | -0.387858 | 0.842719  |
| 65 | 1 | 0 | -6.010248 | -3.003818 | 1.450952  |
| 66 | 1 | 0 | -4.225921 | -3.308161 | 1.105476  |
| 67 | 1 | 0 | -7.019978 | -0.917800 | 1.166294  |
| 68 | 1 | 0 | -5.961776 | 0.454343  | 1.526315  |
| 69 | 1 | 0 | -6.310522 | 0.041261  | -0.148637 |
| 70 | 1 | 0 | -2.503806 | 1.993058  | -0.744098 |
| 71 | 1 | 0 | -2.817653 | 3.501789  | 0.128757  |
| 72 | 1 | 0 | -2.522702 | 2.255742  | 1.998866  |
| 73 | 1 | 0 | -4.201003 | 1.875292  | 1.769252  |
| 74 | 8 | 0 | -2.736784 | -3.538693 | -1.758535 |
| 75 | 1 | 0 | -3.785461 | -1.847799 | -2.064192 |
| 76 | 6 | 0 | -1.326186 | -0.176749 | -2.685283 |
| 77 | 1 | 0 | -1.104260 | 0.729849  | -3.253200 |
| 78 | 1 | 0 | -0.536868 | -0.914175 | -2.862037 |
| 79 | 1 | 0 | -2.283284 | -0.577831 | -3.040006 |
| 80 | 6 | 0 | 4.771972  | -2.891752 | -0.174574 |
| 81 | 1 | 0 | 5.766785  | -2.670809 | -0.573183 |
| 82 | 1 | 0 | 4.907840  | -3.325300 | 0.822635  |
| 83 | 1 | 0 | 4.341771  | -3.661736 | -0.819676 |
| 84 | 1 | 0 | -6.608386 | 4.106754  | -1.517593 |
| 85 | 1 | 0 | -7.211281 | 2.643469  | -0.694517 |
| 86 | 1 | 0 | -7.213054 | 4.215641  | 0.166990  |

---

| Center<br>Number | Atomic<br>Number | Atomic<br>Type | Coordinates (Angstroms) |           |           |
|------------------|------------------|----------------|-------------------------|-----------|-----------|
|                  |                  |                | X                       | Y         | Z         |
| 1                | 6                | 0              | -0.897895               | 0.202577  | -1.136623 |
| 2                | 6                | 0              | 0.487500                | 0.873668  | -1.014314 |
| 3                | 1                | 0              | -0.903063               | -0.348992 | -2.080760 |
| 4                | 1                | 0              | -1.664013               | 0.980981  | -1.224957 |
| 5                | 1                | 0              | 0.516591                | 1.572577  | -0.173227 |
| 6                | 1                | 0              | 0.674317                | 1.457837  | -1.923833 |
| 7                | 6                | 0              | 3.750321                | -1.053488 | -0.127141 |
| 8                | 6                | 0              | 2.586257                | -1.972110 | 0.361554  |
| 9                | 6                | 0              | 1.359808                | -0.997441 | 0.463193  |
| 10               | 6                | 0              | 1.554376                | -0.209147 | -0.851668 |
| 11               | 6                | 0              | 2.997233                | -2.754719 | 1.585908  |
| 12               | 1                | 0              | 2.317058                | -2.710025 | -0.399518 |
| 13               | 8                | 0              | 1.518759                | -0.044219 | 1.535539  |
| 14               | 6                | 0              | -1.870266               | -3.050635 | 0.679083  |
| 15               | 6                | 0              | -2.334612               | -1.901728 | -0.275706 |
| 16               | 6                | 0              | -1.248944               | -0.749311 | 0.045443  |
| 17               | 6                | 0              | -0.026992               | -1.602692 | 0.464233  |
| 18               | 6                | 0              | -0.389211               | -2.838677 | 0.824088  |
| 19               | 1                | 0              | -2.361780               | -2.980204 | 1.661674  |
| 20               | 1                | 0              | -2.117848               | -4.042389 | 0.283414  |
| 21               | 6                | 0              | -2.181514               | -2.424701 | -1.722580 |
| 22               | 6                | 0              | -1.682377               | 0.121694  | 1.253864  |
| 23               | 1                | 0              | 0.285015                | -3.605593 | 1.191462  |
| 24               | 1                | 0              | -2.488148               | -1.694288 | -2.475903 |
| 25               | 1                | 0              | -1.143717               | -2.702540 | -1.930790 |
| 26               | 1                | 0              | -2.792264               | -3.320703 | -1.867808 |
| 27               | 1                | 0              | -0.874404               | 0.798986  | 1.538314  |
| 28               | 1                | 0              | -2.559694               | 0.729996  | 1.016720  |
| 29               | 1                | 0              | -1.922957               | -0.489565 | 2.129389  |
| 30               | 6                | 0              | -3.827670               | -1.520106 | 0.010620  |
| 31               | 6                | 0              | -4.373414               | -0.424684 | -0.937359 |
| 32               | 6                | 0              | -5.648774               | 0.268030  | -0.475581 |
| 33               | 6                | 0              | -6.219796               | 1.301980  | -1.461094 |
| 34               | 6                | 0              | -6.849087               | 2.369003  | -0.549713 |
| 35               | 6                | 0              | -6.049672               | 2.214984  | 0.741118  |
| 36               | 8                | 0              | -5.371600               | 1.043832  | 0.740932  |
| 37               | 1                | 0              | -6.415456               | -0.461450 | -0.195024 |
| 38               | 1                | 0              | -6.935543               | 0.847569  | -2.151491 |
| 39               | 1                | 0              | -5.406084               | 1.735497  | -2.052944 |
| 40               | 1                | 0              | -6.688374               | 3.383037  | -0.927078 |
| 41               | 6                | 0              | -8.353354               | 2.174515  | -0.277667 |
| 42               | 1                | 0              | -3.863007               | -1.122083 | 1.030132  |
| 43               | 1                | 0              | -4.591411               | -0.862179 | -1.920800 |
| 44               | 1                | 0              | -3.626293               | 0.355966  | -1.106649 |
| 45               | 8                | 0              | -5.995694               | 2.983368  | 1.679786  |
| 46               | 1                | 0              | -8.710359               | 2.901316  | 0.457390  |
| 47               | 1                | 0              | -8.918026               | 2.315270  | -1.204184 |
| 48               | 1                | 0              | -8.568781               | 1.169984  | 0.102247  |
| 49               | 1                | 0              | 1.356201                | -0.950606 | -1.639228 |
| 50               | 6                | 0              | 3.074345                | 0.123470  | -0.976696 |
| 51               | 6                | 0              | 3.476916                | 0.155588  | -2.464600 |

|    |   |   |           |           |           |
|----|---|---|-----------|-----------|-----------|
| 52 | 6 | 0 | 3.397991  | 1.505042  | -0.340225 |
| 53 | 1 | 0 | 4.562253  | 0.176003  | -2.596520 |
| 54 | 1 | 0 | 3.093064  | -0.709419 | -3.011796 |
| 55 | 1 | 0 | 3.065817  | 1.051340  | -2.944609 |
| 56 | 6 | 0 | 4.873585  | 1.958035  | -0.443046 |
| 57 | 6 | 0 | 5.076362  | 3.253995  | 0.306428  |
| 58 | 8 | 0 | 5.353377  | 3.342970  | 1.491058  |
| 59 | 8 | 0 | 4.880890  | 4.330918  | -0.483594 |
| 60 | 6 | 0 | 4.996743  | 5.624462  | 0.148570  |
| 61 | 6 | 0 | 4.894472  | -1.842962 | -0.756361 |
| 62 | 1 | 0 | 4.163675  | -0.577339 | 0.768800  |
| 63 | 6 | 0 | 6.161888  | -1.628602 | -0.369879 |
| 64 | 6 | 0 | 4.580775  | -2.928067 | -1.765383 |
| 65 | 1 | 0 | 6.988721  | -2.187417 | -0.800645 |
| 66 | 1 | 0 | 6.415547  | -0.897222 | 0.392888  |
| 67 | 1 | 0 | 5.493016  | -3.273739 | -2.258999 |
| 68 | 1 | 0 | 4.122405  | -3.796719 | -1.276447 |
| 69 | 1 | 0 | 3.880568  | -2.596037 | -2.536869 |
| 70 | 1 | 0 | 5.166225  | 2.100237  | -1.485943 |
| 71 | 1 | 0 | 5.538385  | 1.218722  | 0.008166  |
| 72 | 1 | 0 | 3.103104  | 1.485872  | 0.711364  |
| 73 | 1 | 0 | 2.779367  | 2.263809  | -0.833562 |
| 74 | 8 | 0 | 2.690551  | -3.916612 | 1.798593  |
| 75 | 1 | 0 | 3.658355  | -2.224175 | 2.300258  |
| 76 | 6 | 0 | 1.290775  | -0.477330 | 2.873727  |
| 77 | 1 | 0 | 0.388688  | -1.090576 | 2.961102  |
| 78 | 1 | 0 | 2.144630  | -1.039063 | 3.272492  |
| 79 | 1 | 0 | 1.167952  | 0.429097  | 3.471295  |
| 80 | 6 | 0 | -4.765195 | -2.747168 | -0.012289 |
| 81 | 1 | 0 | -5.779929 | -2.466954 | 0.287541  |
| 82 | 1 | 0 | -4.832755 | -3.192817 | -1.010841 |
| 83 | 1 | 0 | -4.436654 | -3.524900 | 0.681749  |
| 84 | 1 | 0 | 4.801674  | 6.350166  | -0.639744 |
| 85 | 1 | 0 | 4.262564  | 5.721023  | 0.951277  |
| 86 | 1 | 0 | 6.001668  | 5.758798  | 0.554549  |

---



| Center<br>Number | Atomic<br>Number | Atomic<br>Type | Coordinates (Angstroms) |           |           |
|------------------|------------------|----------------|-------------------------|-----------|-----------|
|                  |                  |                | X                       | Y         | Z         |
| 1                | 6                | 0              | -0.966100               | 0.219786  | -1.149812 |
| 2                | 6                | 0              | 0.431303                | 0.869918  | -1.053402 |
| 3                | 1                | 0              | -0.986776               | -0.355610 | -2.079538 |
| 4                | 1                | 0              | -1.719568               | 1.008580  | -1.253663 |
| 5                | 1                | 0              | 0.479215                | 1.590915  | -0.232166 |
| 6                | 1                | 0              | 0.622485                | 1.426221  | -1.979289 |
| 7                | 6                | 0              | 3.666011                | -1.084408 | -0.132227 |
| 8                | 6                | 0              | 2.490987                | -1.972940 | 0.385068  |
| 9                | 6                | 0              | 1.281176                | -0.975821 | 0.468375  |
| 10               | 6                | 0              | 1.479937                | -0.226858 | -0.868571 |
| 11               | 6                | 0              | 2.895854                | -2.729448 | 1.627254  |
| 12               | 1                | 0              | 2.205805                | -2.725958 | -0.355099 |
| 13               | 8                | 0              | 1.462765                | 0.001678  | 1.515139  |
| 14               | 6                | 0              | -1.981189               | -2.968183 | 0.757129  |
| 15               | 6                | 0              | -2.431422               | -1.838043 | -0.226387 |
| 16               | 6                | 0              | -1.325715               | -0.695395 | 0.058680  |
| 17               | 6                | 0              | -0.115307               | -1.557674 | 0.493603  |
| 18               | 6                | 0              | -0.496012               | -2.777276 | 0.888707  |
| 19               | 1                | 0              | -2.466203               | -2.862647 | 1.739796  |
| 20               | 1                | 0              | -2.247361               | -3.965939 | 0.389635  |
| 21               | 6                | 0              | -2.293320               | -2.402704 | -1.659041 |
| 22               | 6                | 0              | -1.737077               | 0.213449  | 1.246786  |
| 23               | 1                | 0              | 0.167061                | -3.545496 | 1.273172  |
| 24               | 1                | 0              | -2.593712               | -1.689152 | -2.430808 |
| 25               | 1                | 0              | -1.260426               | -2.700152 | -1.864473 |
| 26               | 1                | 0              | -2.917114               | -3.293865 | -1.776564 |
| 27               | 1                | 0              | -0.917555               | 0.886684  | 1.507120  |
| 28               | 1                | 0              | -2.607394               | 0.828062  | 1.000305  |
| 29               | 1                | 0              | -1.979836               | -0.371217 | 2.139699  |
| 30               | 6                | 0              | -3.916476               | -1.424443 | 0.056599  |
| 31               | 6                | 0              | -4.446946               | -0.342025 | -0.914194 |
| 32               | 6                | 0              | -5.723135               | 0.364974  | -0.477205 |
| 33               | 6                | 0              | -6.266858               | 1.400173  | -1.476747 |
| 34               | 6                | 0              | -6.903556               | 2.475620  | -0.580512 |
| 35               | 6                | 0              | -6.129501               | 2.319186  | 0.725455  |
| 36               | 8                | 0              | -5.460371               | 1.142940  | 0.740984  |
| 37               | 1                | 0              | -6.501856               | -0.356007 | -0.207991 |
| 38               | 1                | 0              | -6.973873               | 0.949570  | -2.178542 |
| 39               | 1                | 0              | -5.438751               | 1.824575  | -2.055022 |
| 40               | 1                | 0              | -6.727434               | 3.486989  | -0.958095 |
| 41               | 6                | 0              | -8.414079               | 2.294015  | -0.335743 |
| 42               | 1                | 0              | -3.939904               | -1.001376 | 1.066384  |
| 43               | 1                | 0              | -4.657904               | -0.793401 | -1.892885 |
| 44               | 1                | 0              | -3.693234               | 0.431212  | -1.087860 |
| 45               | 8                | 0              | -6.087747               | 3.089460  | 1.663154  |
| 46               | 1                | 0              | -8.779133               | 3.026250  | 0.389901  |
| 47               | 1                | 0              | -8.960313               | 2.435384  | -1.273159 |
| 48               | 1                | 0              | -8.644026               | 1.292539  | 0.043735  |
| 49               | 1                | 0              | 1.261726                | -0.986577 | -1.633107 |
| 50               | 6                | 0              | 3.003811                | 0.076241  | -1.015205 |
| 51               | 6                | 0              | 3.391842                | 0.047684  | -2.507840 |

|    |   |   |           |           |           |
|----|---|---|-----------|-----------|-----------|
| 52 | 6 | 0 | 3.357935  | 1.474116  | -0.433412 |
| 53 | 1 | 0 | 4.475846  | 0.041977  | -2.652217 |
| 54 | 1 | 0 | 2.985742  | -0.827768 | -3.021601 |
| 55 | 1 | 0 | 2.992205  | 0.934044  | -3.014314 |
| 56 | 6 | 0 | 4.831498  | 1.883493  | -0.544239 |
| 57 | 6 | 0 | 5.104056  | 3.260335  | 0.023542  |
| 58 | 8 | 0 | 4.267463  | 4.109369  | 0.275605  |
| 59 | 8 | 0 | 6.427978  | 3.459852  | 0.204664  |
| 60 | 6 | 0 | 6.822622  | 4.758679  | 0.697533  |
| 61 | 6 | 0 | 4.800295  | -1.905926 | -0.737281 |
| 62 | 1 | 0 | 4.084842  | -0.587427 | 0.749882  |
| 63 | 6 | 0 | 6.070333  | -1.696075 | -0.356763 |
| 64 | 6 | 0 | 4.473982  | -3.014565 | -1.716096 |
| 65 | 1 | 0 | 6.890720  | -2.276150 | -0.771392 |
| 66 | 1 | 0 | 6.332810  | -0.945861 | 0.384484  |
| 67 | 1 | 0 | 5.382252  | -3.385402 | -2.198680 |
| 68 | 1 | 0 | 4.003899  | -3.863399 | -1.204078 |
| 69 | 1 | 0 | 3.779100  | -2.694399 | -2.497247 |
| 70 | 1 | 0 | 5.163922  | 1.913143  | -1.589589 |
| 71 | 1 | 0 | 5.499062  | 1.177240  | -0.042895 |
| 72 | 1 | 0 | 3.052359  | 1.510492  | 0.614624  |
| 73 | 1 | 0 | 2.758195  | 2.227127  | -0.955440 |
| 74 | 8 | 0 | 2.577193  | -3.882209 | 1.870093  |
| 75 | 1 | 0 | 3.564276  | -2.188618 | 2.327139  |
| 76 | 6 | 0 | 1.233034  | -0.392605 | 2.864774  |
| 77 | 1 | 0 | 1.110933  | 0.530305  | 3.436876  |
| 78 | 1 | 0 | 0.330091  | -1.001860 | 2.969315  |
| 79 | 1 | 0 | 2.085815  | -0.944688 | 3.279514  |
| 80 | 6 | 0 | -4.874458 | -2.635778 | 0.067979  |
| 81 | 1 | 0 | -5.879413 | -2.334102 | 0.379340  |
| 82 | 1 | 0 | -4.965212 | -3.096656 | -0.921877 |
| 83 | 1 | 0 | -4.547697 | -3.407626 | 0.769346  |
| 84 | 1 | 0 | 6.377796  | 4.943984  | 1.677553  |
| 85 | 1 | 0 | 7.908697  | 4.722255  | 0.770621  |
| 86 | 1 | 0 | 6.510438  | 5.540081  | 0.001198  |

---

| Center<br>Number | Atomic<br>Number | Atomic<br>Type | Coordinates (Angstroms) |           |           |
|------------------|------------------|----------------|-------------------------|-----------|-----------|
|                  |                  |                | X                       | Y         | Z         |
| 1                | 6                | 0              | -0.896417               | 0.027357  | -1.187229 |
| 2                | 6                | 0              | 0.471910                | 0.745744  | -1.179569 |
| 3                | 1                | 0              | -0.930549               | -0.574374 | -2.099433 |
| 4                | 1                | 0              | -1.692617               | 0.774692  | -1.277848 |
| 5                | 1                | 0              | 0.514976                | 1.509428  | -0.397995 |
| 6                | 1                | 0              | 0.599799                | 1.260394  | -2.139281 |
| 7                | 6                | 0              | 3.826904                | -0.892369 | -0.195800 |
| 8                | 6                | 0              | 2.753454                | -1.880586 | 0.344771  |
| 9                | 6                | 0              | 1.466371                | -0.976318 | 0.398806  |
| 10               | 6                | 0              | 1.570273                | -0.300213 | -0.986583 |
| 11               | 6                | 0              | 3.213152                | -2.557480 | 1.613550  |
| 12               | 1                | 0              | 2.537814                | -2.678441 | -0.373319 |
| 13               | 8                | 0              | 1.597473                | 0.072004  | 1.381630  |
| 14               | 6                | 0              | -1.656058               | -3.152958 | 0.853031  |
| 15               | 6                | 0              | -2.197488               | -2.090032 | -0.159603 |
| 16               | 6                | 0              | -1.160158               | -0.871384 | 0.059827  |
| 17               | 6                | 0              | 0.112536                | -1.642706 | 0.492904  |
| 18               | 6                | 0              | -0.183189               | -2.866812 | 0.942238  |
| 19               | 1                | 0              | -2.126757               | -3.044014 | 1.842260  |
| 20               | 1                | 0              | -1.864722               | -4.178025 | 0.525986  |
| 21               | 6                | 0              | -2.050606               | -2.700595 | -1.572477 |
| 22               | 6                | 0              | -1.598684               | 0.045457  | 1.232043  |
| 23               | 1                | 0              | 0.535168                | -3.578342 | 1.336355  |
| 24               | 1                | 0              | -2.407396               | -2.038297 | -2.365316 |
| 25               | 1                | 0              | -1.005075               | -2.942302 | -1.786929 |
| 26               | 1                | 0              | -2.620750               | -3.631773 | -1.642123 |
| 27               | 1                | 0              | -0.825369               | 0.787980  | 1.440205  |
| 28               | 1                | 0              | -2.520054               | 0.585350  | 0.997396  |
| 29               | 1                | 0              | -1.768028               | -0.523744 | 2.151150  |
| 30               | 6                | 0              | -3.701126               | -1.762544 | 0.142837  |
| 31               | 6                | 0              | -4.313940               | -0.730765 | -0.833673 |
| 32               | 6                | 0              | -5.697895               | -0.201846 | -0.452491 |
| 33               | 6                | 0              | -6.229581               | 0.911432  | -1.378241 |
| 34               | 6                | 0              | -5.837995               | 2.211773  | -0.659195 |
| 35               | 6                | 0              | -5.734101               | 1.771562  | 0.797401  |
| 36               | 8                | 0              | -5.652962               | 0.423111  | 0.876066  |
| 37               | 1                | 0              | -6.413807               | -1.019649 | -0.357480 |
| 38               | 1                | 0              | -7.320131               | 0.845571  | -1.457735 |
| 39               | 1                | 0              | -5.813836               | 0.836489  | -2.386089 |
| 40               | 1                | 0              | -4.819467               | 2.508021  | -0.948058 |
| 41               | 6                | 0              | -6.772085               | 3.405391  | -0.865265 |
| 42               | 1                | 0              | -3.733689               | -1.323739 | 1.145520  |
| 43               | 1                | 0              | -4.421488               | -1.180232 | -1.829326 |
| 44               | 1                | 0              | -3.644243               | 0.126318  | -0.954967 |
| 45               | 8                | 0              | -5.708145               | 2.470367  | 1.789740  |
| 46               | 1                | 0              | -6.448740               | 4.258226  | -0.262388 |
| 47               | 1                | 0              | -6.774961               | 3.707884  | -1.916836 |
| 48               | 1                | 0              | -7.798711               | 3.153375  | -0.579128 |
| 49               | 1                | 0              | 1.317101                | -1.112643 | -1.681687 |
| 50               | 6                | 0              | 3.080453                | 0.007912  | -1.273242 |
| 51               | 6                | 0              | 3.377276                | -0.420647 | -2.728895 |

|    |   |   |           |           |           |
|----|---|---|-----------|-----------|-----------|
| 52 | 6 | 0 | 3.503779  | 1.500651  | -1.196544 |
| 53 | 1 | 0 | 4.436865  | -0.304176 | -2.977324 |
| 54 | 1 | 0 | 3.093444  | -1.460023 | -2.916101 |
| 55 | 1 | 0 | 2.802035  | 0.203587  | -3.422732 |
| 56 | 6 | 0 | 3.431308  | 2.238320  | 0.145024  |
| 57 | 6 | 0 | 3.655508  | 3.728090  | 0.001871  |
| 58 | 8 | 0 | 3.582766  | 4.371055  | -1.031285 |
| 59 | 8 | 0 | 3.930399  | 4.295503  | 1.197043  |
| 60 | 6 | 0 | 4.110826  | 5.728109  | 1.205111  |
| 61 | 6 | 0 | 5.148589  | -1.527001 | -0.612517 |
| 62 | 1 | 0 | 4.060755  | -0.231096 | 0.643250  |
| 63 | 6 | 0 | 6.303705  | -0.898094 | -0.341573 |
| 64 | 6 | 0 | 5.152897  | -2.876969 | -1.296361 |
| 65 | 1 | 0 | 7.262001  | -1.316290 | -0.638510 |
| 66 | 1 | 0 | 6.328135  | 0.053566  | 0.183313  |
| 67 | 1 | 0 | 6.168612  | -3.159144 | -1.586574 |
| 68 | 1 | 0 | 4.768546  | -3.660523 | -0.631965 |
| 69 | 1 | 0 | 4.527674  | -2.893800 | -2.194408 |
| 70 | 1 | 0 | 4.163293  | 1.864941  | 0.867445  |
| 71 | 1 | 0 | 2.458108  | 2.102266  | 0.627658  |
| 72 | 1 | 0 | 2.900222  | 2.054417  | -1.923179 |
| 73 | 1 | 0 | 4.535611  | 1.567894  | -1.564723 |
| 74 | 8 | 0 | 2.960702  | -3.714139 | 1.910308  |
| 75 | 1 | 0 | 3.858990  | -1.952717 | 2.281297  |
| 76 | 6 | 0 | 1.453342  | -0.261652 | 2.759693  |
| 77 | 1 | 0 | 2.376134  | -0.687360 | 3.172838  |
| 78 | 1 | 0 | 1.242849  | 0.674073  | 3.283352  |
| 79 | 1 | 0 | 0.629043  | -0.960948 | 2.930338  |
| 80 | 6 | 0 | -4.581222 | -3.030811 | 0.194662  |
| 81 | 1 | 0 | -5.579035 | -2.795865 | 0.577293  |
| 82 | 1 | 0 | -4.707974 | -3.484120 | -0.794971 |
| 83 | 1 | 0 | -4.162901 | -3.789957 | 0.860043  |
| 84 | 1 | 0 | 4.314159  | 5.987828  | 2.243134  |
| 85 | 1 | 0 | 4.952011  | 6.008654  | 0.567534  |
| 86 | 1 | 0 | 3.204652  | 6.227341  | 0.854978  |

---

| Center<br>Number | Atomic<br>Number | Atomic<br>Type | Coordinates (Angstroms) |           |           |
|------------------|------------------|----------------|-------------------------|-----------|-----------|
|                  |                  |                | X                       | Y         | Z         |
| 1                | 6                | 0              | -0.812626               | 0.147667  | -1.064949 |
| 2                | 6                | 0              | 0.550431                | 0.834719  | -0.828151 |
| 3                | 1                | 0              | -0.774803               | -0.294383 | -2.064417 |
| 4                | 1                | 0              | -1.597091               | 0.912399  | -1.092279 |
| 5                | 1                | 0              | 0.537548                | 1.442209  | 0.082117  |
| 6                | 1                | 0              | 0.735520                | 1.511534  | -1.669795 |
| 7                | 6                | 0              | 3.823842                | -1.076144 | 0.031227  |
| 8                | 6                | 0              | 2.684357                | -2.098176 | 0.296485  |
| 9                | 6                | 0              | 1.424498                | -1.171694 | 0.454377  |
| 10               | 6                | 0              | 1.648518                | -0.228580 | -0.750074 |
| 11               | 6                | 0              | 3.046858                | -3.032029 | 1.426278  |
| 12               | 1                | 0              | 2.487868                | -2.728007 | -0.576634 |
| 13               | 8                | 0              | 1.513574                | -0.338207 | 1.630644  |
| 14               | 6                | 0              | -1.748338               | -3.317861 | 0.314046  |
| 15               | 6                | 0              | -2.223563               | -2.067967 | -0.498436 |
| 16               | 6                | 0              | -1.173519               | -0.940731 | -0.012342 |
| 17               | 6                | 0              | 0.058270                | -1.809008 | 0.335682  |
| 18               | 6                | 0              | -0.278329               | -3.089100 | 0.526739  |
| 19               | 1                | 0              | -2.265158               | -3.387998 | 1.283307  |
| 20               | 1                | 0              | -1.956084               | -4.256288 | -0.212868 |
| 21               | 6                | 0              | -2.028759               | -2.403595 | -1.995181 |
| 22               | 6                | 0              | -1.658406               | -0.228929 | 1.278045  |
| 23               | 1                | 0              | 0.407135                | -3.879565 | 0.814123  |
| 24               | 1                | 0              | -2.333284               | -1.590301 | -2.658974 |
| 25               | 1                | 0              | -0.981118               | -2.634829 | -2.211598 |
| 26               | 1                | 0              | -2.617043               | -3.285626 | -2.265599 |
| 27               | 1                | 0              | -0.878646               | 0.433063  | 1.659741  |
| 28               | 1                | 0              | -2.547905               | 0.379203  | 1.091417  |
| 29               | 1                | 0              | -1.901606               | -0.944251 | 2.069754  |
| 30               | 6                | 0              | -3.731802               | -1.761667 | -0.197707 |
| 31               | 6                | 0              | -4.283906               | -0.552435 | -0.989744 |
| 32               | 6                | 0              | -5.659031               | -0.048244 | -0.547872 |
| 33               | 6                | 0              | -6.131988               | 1.227199  | -1.274619 |
| 34               | 6                | 0              | -5.705721               | 2.367393  | -0.337074 |
| 35               | 6                | 0              | -5.657065               | 1.680144  | 1.023699  |
| 36               | 8                | 0              | -5.625718               | 0.335938  | 0.869848  |
| 37               | 1                | 0              | -6.403895               | -0.843270 | -0.608540 |
| 38               | 1                | 0              | -7.222681               | 1.219215  | -1.376768 |
| 39               | 1                | 0              | -5.700978               | 1.309849  | -2.275426 |
| 40               | 1                | 0              | -4.668302               | 2.660801  | -0.552848 |
| 41               | 6                | 0              | -6.583703               | 3.619671  | -0.352355 |
| 42               | 1                | 0              | -3.797640               | -1.512370 | 0.866484  |
| 43               | 1                | 0              | -4.379731               | -0.817273 | -2.050747 |
| 44               | 1                | 0              | -3.583348               | 0.287305  | -0.944384 |
| 45               | 8                | 0              | -5.632492               | 2.196601  | 2.121953  |
| 46               | 1                | 0              | -6.244490               | 4.339138  | 0.397758  |
| 47               | 1                | 0              | -6.542571               | 4.099968  | -1.334649 |
| 48               | 1                | 0              | -7.627884               | 3.368500  | -0.138022 |
| 49               | 1                | 0              | 1.497129                | -0.875901 | -1.626348 |
| 50               | 6                | 0              | 3.168541                | 0.138801  | -0.781902 |
| 51               | 6                | 0              | 3.634983                | 0.220793  | -2.247501 |

|    |   |   |           |           |           |
|----|---|---|-----------|-----------|-----------|
| 52 | 6 | 0 | 3.577930  | 1.436875  | -0.026032 |
| 53 | 1 | 0 | 4.703939  | 0.446719  | -2.320363 |
| 54 | 1 | 0 | 3.448802  | -0.713492 | -2.783377 |
| 55 | 1 | 0 | 3.088018  | 1.004673  | -2.781933 |
| 56 | 6 | 0 | 3.284910  | 2.782882  | -0.701070 |
| 57 | 6 | 0 | 3.796999  | 3.959239  | 0.104613  |
| 58 | 8 | 0 | 4.561890  | 3.903052  | 1.051066  |
| 59 | 8 | 0 | 3.308369  | 5.124154  | -0.374553 |
| 60 | 6 | 0 | 3.756723  | 6.330118  | 0.281464  |
| 61 | 6 | 0 | 5.109613  | -1.679355 | -0.519963 |
| 62 | 1 | 0 | 4.080882  | -0.659196 | 1.010512  |
| 63 | 6 | 0 | 6.297815  | -1.251367 | -0.063480 |
| 64 | 6 | 0 | 5.037720  | -2.792398 | -1.543174 |
| 65 | 1 | 0 | 7.232081  | -1.653302 | -0.447188 |
| 66 | 1 | 0 | 6.373685  | -0.488352 | 0.706816  |
| 67 | 1 | 0 | 6.034164  | -3.033940 | -1.922974 |
| 68 | 1 | 0 | 4.621723  | -3.706516 | -1.101587 |
| 69 | 1 | 0 | 4.401173  | -2.541344 | -2.397297 |
| 70 | 1 | 0 | 2.219366  | 2.945757  | -0.879214 |
| 71 | 1 | 0 | 3.768310  | 2.854824  | -1.683210 |
| 72 | 1 | 0 | 4.660723  | 1.386889  | 0.137877  |
| 73 | 1 | 0 | 3.115200  | 1.423082  | 0.964231  |
| 74 | 8 | 0 | 2.779822  | -4.222720 | 1.451763  |
| 75 | 1 | 0 | 3.635442  | -2.588276 | 2.253940  |
| 76 | 6 | 0 | 1.273564  | -0.928528 | 2.905582  |
| 77 | 1 | 0 | 1.013914  | -0.110442 | 3.581953  |
| 78 | 1 | 0 | 0.447941  | -1.646646 | 2.879030  |
| 79 | 1 | 0 | 2.169828  | -1.426105 | 3.296453  |
| 80 | 6 | 0 | -4.637448 | -2.993639 | -0.416047 |
| 81 | 1 | 0 | -5.647627 | -2.804975 | -0.040474 |
| 82 | 1 | 0 | -4.725994 | -3.255696 | -1.476391 |
| 83 | 1 | 0 | -4.265049 | -3.871933 | 0.116785  |
| 84 | 1 | 0 | 4.841626  | 6.426107  | 0.199368  |
| 85 | 1 | 0 | 3.259526  | 7.145654  | -0.241924 |
| 86 | 1 | 0 | 3.469614  | 6.318514  | 1.335021  |

---

| Center<br>Number | Atomic<br>Number | Atomic<br>Type | Coordinates (Angstroms) |           |           |
|------------------|------------------|----------------|-------------------------|-----------|-----------|
|                  |                  |                | X                       | Y         | Z         |
| 1                | 6                | 0              | -0.969899               | -0.050773 | -1.173262 |
| 2                | 6                | 0              | 0.401830                | 0.657211  | -1.199901 |
| 3                | 1                | 0              | -1.021032               | -0.673192 | -2.070543 |
| 4                | 1                | 0              | -1.762358               | 0.699712  | -1.269552 |
| 5                | 1                | 0              | 0.460833                | 1.439551  | -0.438096 |
| 6                | 1                | 0              | 0.520264                | 1.146979  | -2.173695 |
| 7                | 6                | 0              | 3.775178                | -1.008086 | -0.274963 |
| 8                | 6                | 0              | 2.704012                | -1.923544 | 0.366847  |
| 9                | 6                | 0              | 1.411553                | -1.030308 | 0.408088  |
| 10               | 6                | 0              | 1.496923                | -0.388342 | -0.993616 |
| 11               | 6                | 0              | 3.150203                | -2.565164 | 1.660567  |
| 12               | 1                | 0              | 2.447382                | -2.764799 | -0.292448 |
| 13               | 8                | 0              | 1.550036                | 0.042717  | 1.362793  |
| 14               | 6                | 0              | -1.733241               | -3.173282 | 0.948760  |
| 15               | 6                | 0              | -2.275627               | -2.129132 | -0.081009 |
| 16               | 6                | 0              | -1.222155               | -0.917506 | 0.097401  |
| 17               | 6                | 0              | 0.052095                | -1.689193 | 0.531696  |
| 18               | 6                | 0              | -0.256835               | -2.898987 | 1.010361  |
| 19               | 1                | 0              | -2.187714               | -3.035386 | 1.941695  |
| 20               | 1                | 0              | -1.956942               | -4.203529 | 0.649189  |
| 21               | 6                | 0              | -2.153065               | -2.773733 | -1.481282 |
| 22               | 6                | 0              | -1.636607               | 0.029955  | 1.253698  |
| 23               | 1                | 0              | 0.446503                | -3.618828 | 1.417384  |
| 24               | 1                | 0              | -2.513064               | -2.125858 | -2.284402 |
| 25               | 1                | 0              | -1.112677               | -3.030472 | -1.703582 |
| 26               | 1                | 0              | -2.732950               | -3.700664 | -1.523222 |
| 27               | 1                | 0              | -0.854100               | 0.769453  | 1.435976  |
| 28               | 1                | 0              | -2.555902               | 0.572042  | 1.016594  |
| 29               | 1                | 0              | -1.800870               | -0.516251 | 2.187663  |
| 30               | 6                | 0              | -3.771439               | -1.776445 | 0.231693  |
| 31               | 6                | 0              | -4.390679               | -0.779945 | -0.777342 |
| 32               | 6                | 0              | -5.737553               | -0.180234 | -0.368902 |
| 33               | 6                | 0              | -6.283465               | 0.880955  | -1.346194 |
| 34               | 6                | 0              | -5.809646               | 2.214809  | -0.748104 |
| 35               | 6                | 0              | -5.645158               | 1.878727  | 0.730508  |
| 36               | 8                | 0              | -5.604734               | 0.537247  | 0.905924  |
| 37               | 1                | 0              | -6.471649               | -0.964663 | -0.177983 |
| 38               | 1                | 0              | -7.378354               | 0.849627  | -1.361915 |
| 39               | 1                | 0              | -5.927333               | 0.717069  | -2.366322 |
| 40               | 1                | 0              | -4.797695               | 2.447905  | -1.108673 |
| 41               | 6                | 0              | -6.709976               | 3.426029  | -0.996948 |
| 42               | 1                | 0              | -3.784715               | -1.297150 | 1.216092  |
| 43               | 1                | 0              | -4.555855               | -1.281968 | -1.739348 |
| 44               | 1                | 0              | -3.698683               | 0.044110  | -0.976286 |
| 45               | 8                | 0              | -5.543812               | 2.646491  | 1.665151  |
| 46               | 1                | 0              | -6.328869               | 4.305632  | -0.471151 |
| 47               | 1                | 0              | -6.752112               | 3.654486  | -2.066197 |
| 48               | 1                | 0              | -7.730006               | 3.233732  | -0.647895 |
| 49               | 1                | 0              | 1.237250                | -1.218736 | -1.665614 |
| 50               | 6                | 0              | 3.000224                | -0.079831 | -1.313635 |
| 51               | 6                | 0              | 3.244629                | -0.502835 | -2.780409 |

|    |   |   |           |           |           |
|----|---|---|-----------|-----------|-----------|
| 52 | 6 | 0 | 3.408137  | 1.419013  | -1.238223 |
| 53 | 1 | 0 | 4.276399  | -0.320307 | -3.095990 |
| 54 | 1 | 0 | 3.035833  | -1.565366 | -2.933647 |
| 55 | 1 | 0 | 2.587068  | 0.070102  | -3.445205 |
| 56 | 6 | 0 | 3.403584  | 2.135853  | 0.115445  |
| 57 | 6 | 0 | 3.698054  | 3.614345  | -0.009885 |
| 58 | 8 | 0 | 3.723935  | 4.259565  | -1.044146 |
| 59 | 8 | 0 | 3.920334  | 4.169704  | 1.201972  |
| 60 | 6 | 0 | 4.175729  | 5.590299  | 1.223613  |
| 61 | 6 | 0 | 5.010697  | -1.717917 | -0.813526 |
| 62 | 1 | 0 | 4.128462  | -0.363536 | 0.535265  |
| 63 | 6 | 0 | 5.020005  | -2.982967 | -1.256654 |
| 64 | 6 | 0 | 6.276496  | -0.891867 | -0.814232 |
| 65 | 1 | 0 | 5.933087  | -3.436467 | -1.633070 |
| 66 | 1 | 0 | 4.136559  | -3.614342 | -1.260467 |
| 67 | 1 | 0 | 7.122990  | -1.451738 | -1.221428 |
| 68 | 1 | 0 | 6.159848  | 0.024286  | -1.406132 |
| 69 | 1 | 0 | 6.528830  | -0.577227 | 0.206379  |
| 70 | 1 | 0 | 4.136505  | 1.715621  | 0.811521  |
| 71 | 1 | 0 | 2.439786  | 2.033332  | 0.623097  |
| 72 | 1 | 0 | 2.757109  | 1.974235  | -1.922098 |
| 73 | 1 | 0 | 4.414016  | 1.512530  | -1.664514 |
| 74 | 8 | 0 | 4.212652  | -2.347881 | 2.216926  |
| 75 | 1 | 0 | 2.449480  | -3.303161 | 2.098562  |
| 76 | 6 | 0 | 1.431969  | -0.257375 | 2.752835  |
| 77 | 1 | 0 | 2.350990  | -0.697213 | 3.153066  |
| 78 | 1 | 0 | 1.257145  | 0.696664  | 3.256191  |
| 79 | 1 | 0 | 0.589430  | -0.926051 | 2.957245  |
| 80 | 6 | 0 | -4.661918 | -3.032951 | 0.347238  |
| 81 | 1 | 0 | -5.660487 | -2.769429 | 0.708853  |
| 82 | 1 | 0 | -4.786571 | -3.539225 | -0.616582 |
| 83 | 1 | 0 | -4.254655 | -3.757368 | 1.056910  |
| 84 | 1 | 0 | 4.324876  | 5.841234  | 2.272956  |
| 85 | 1 | 0 | 5.070258  | 5.824688  | 0.642318  |
| 86 | 1 | 0 | 3.322068  | 6.136508  | 0.816157  |

---



| Center<br>Number | Atomic<br>Number | Atomic<br>Type | Coordinates (Angstroms) |           |           |
|------------------|------------------|----------------|-------------------------|-----------|-----------|
|                  |                  |                | X                       | Y         | Z         |
| 1                | 6                | 0              | -1.088419               | 0.139022  | -1.140020 |
| 2                | 6                | 0              | 0.305630                | 0.796688  | -1.063215 |
| 3                | 1                | 0              | -1.111045               | -0.452566 | -2.059396 |
| 4                | 1                | 0              | -1.848335               | 0.920223  | -1.253910 |
| 5                | 1                | 0              | 0.355152                | 1.533236  | -0.256250 |
| 6                | 1                | 0              | 0.490206                | 1.335216  | -2.000696 |
| 7                | 6                | 0              | 3.563512                | -1.171384 | -0.204937 |
| 8                | 6                | 0              | 2.406797                | -1.979648 | 0.452179  |
| 9                | 6                | 0              | 1.176147                | -1.006411 | 0.497814  |
| 10               | 6                | 0              | 1.359055                | -0.292201 | -0.860266 |
| 11               | 6                | 0              | 2.800336                | -2.674975 | 1.734662  |
| 12               | 1                | 0              | 2.079727                | -2.795946 | -0.206542 |
| 13               | 8                | 0              | 1.331133                | 0.004462  | 1.516806  |
| 14               | 6                | 0              | -2.082854               | -3.018826 | 0.823028  |
| 15               | 6                | 0              | -2.536482               | -1.909264 | -0.181655 |
| 16               | 6                | 0              | -1.436438               | -0.757840 | 0.084866  |
| 17               | 6                | 0              | -0.217487               | -1.603612 | 0.534935  |
| 18               | 6                | 0              | -0.599366               | -2.815385 | 0.952301  |
| 19               | 1                | 0              | -2.571108               | -2.899666 | 1.802319  |
| 20               | 1                | 0              | -2.339637               | -4.024755 | 0.471829  |
| 21               | 6                | 0              | -2.392823               | -2.502883 | -1.602062 |
| 22               | 6                | 0              | -1.847777               | 0.163855  | 1.263172  |
| 23               | 1                | 0              | 0.054432                | -3.581653 | 1.357200  |
| 24               | 1                | 0              | -2.693017               | -1.807261 | -2.389826 |
| 25               | 1                | 0              | -1.358547               | -2.801271 | -1.799333 |
| 26               | 1                | 0              | -3.014524               | -3.397758 | -1.701393 |
| 27               | 1                | 0              | -1.031871               | 0.845872  | 1.510527  |
| 28               | 1                | 0              | -2.722368               | 0.770680  | 1.013204  |
| 29               | 1                | 0              | -2.084279               | -0.410185 | 2.164301  |
| 30               | 6                | 0              | -4.024586               | -1.499329 | 0.093940  |
| 31               | 6                | 0              | -4.553425               | -0.412888 | -0.871641 |
| 32               | 6                | 0              | -5.920600               | 0.175998  | -0.517415 |
| 33               | 6                | 0              | -6.345033               | 1.366836  | -1.401324 |
| 34               | 6                | 0              | -5.907782               | 2.600332  | -0.595930 |
| 35               | 6                | 0              | -5.901574               | 2.079209  | 0.837277  |
| 36               | 8                | 0              | -5.899498               | 0.725587  | 0.844353  |
| 37               | 1                | 0              | -6.685774               | -0.601728 | -0.497937 |
| 38               | 1                | 0              | -7.433090               | 1.372624  | -1.528337 |
| 39               | 1                | 0              | -5.890556               | 1.319509  | -2.394066 |
| 40               | 1                | 0              | -4.859729               | 2.842567  | -0.822732 |
| 41               | 6                | 0              | -6.752791               | 3.862276  | -0.777421 |
| 42               | 1                | 0              | -4.053915               | -1.079710 | 1.104680  |
| 43               | 1                | 0              | -4.653137               | -0.829606 | -1.882264 |
| 44               | 1                | 0              | -3.837942               | 0.411382  | -0.949840 |
| 45               | 8                | 0              | -5.886636               | 2.721607  | 1.866971  |
| 46               | 1                | 0              | -6.405086               | 4.658614  | -0.113860 |
| 47               | 1                | 0              | -6.685503               | 4.219375  | -1.809524 |
| 48               | 1                | 0              | -7.806051               | 3.664585  | -0.551854 |
| 49               | 1                | 0              | 1.137386                | -1.073940 | -1.602683 |
| 50               | 6                | 0              | 2.877189                | 0.013909  | -1.035046 |
| 51               | 6                | 0              | 3.223496                | 0.027667  | -2.538080 |

|    |   |   |           |           |           |
|----|---|---|-----------|-----------|-----------|
| 52 | 6 | 0 | 3.247830  | 1.396331  | -0.426001 |
| 53 | 1 | 0 | 4.301769  | 0.066235  | -2.711885 |
| 54 | 1 | 0 | 2.840802  | -0.855195 | -3.057483 |
| 55 | 1 | 0 | 2.775853  | 0.906456  | -3.016696 |
| 56 | 6 | 0 | 4.720296  | 1.805125  | -0.554720 |
| 57 | 6 | 0 | 5.001692  | 3.177517  | 0.019696  |
| 58 | 8 | 0 | 4.171760  | 4.035218  | 0.265213  |
| 59 | 8 | 0 | 6.325765  | 3.363480  | 0.212815  |
| 60 | 6 | 0 | 6.728897  | 4.656744  | 0.712824  |
| 61 | 6 | 0 | 4.558671  | -2.052022 | -0.956468 |
| 62 | 1 | 0 | 4.122694  | -0.709956 | 0.613005  |
| 63 | 6 | 0 | 5.879094  | -1.853953 | -0.830438 |
| 64 | 6 | 0 | 4.043610  | -3.184900 | -1.820673 |
| 65 | 1 | 0 | 6.598774  | -2.463850 | -1.370712 |
| 66 | 1 | 0 | 6.285604  | -1.088075 | -0.176052 |
| 67 | 1 | 0 | 4.837157  | -3.572891 | -2.465090 |
| 68 | 1 | 0 | 3.687284  | -4.020621 | -1.204749 |
| 69 | 1 | 0 | 3.205496  | -2.884980 | -2.458089 |
| 70 | 1 | 0 | 5.039422  | 1.843831  | -1.603949 |
| 71 | 1 | 0 | 5.393334  | 1.095316  | -0.065380 |
| 72 | 1 | 0 | 2.965418  | 1.407787  | 0.628586  |
| 73 | 1 | 0 | 2.640010  | 2.163922  | -0.916784 |
| 74 | 8 | 0 | 3.891580  | -2.585567 | 2.270858  |
| 75 | 1 | 0 | 2.030895  | -3.337611 | 2.178247  |
| 76 | 6 | 0 | 1.141200  | -0.366202 | 2.880157  |
| 77 | 1 | 0 | 2.011856  | -0.893933 | 3.284654  |
| 78 | 1 | 0 | 1.017672  | 0.567429  | 3.434222  |
| 79 | 1 | 0 | 0.247055  | -0.982890 | 3.018385  |
| 80 | 6 | 0 | -4.979892 | -2.713127 | 0.098884  |
| 81 | 1 | 0 | -5.966041 | -2.428453 | 0.477668  |
| 82 | 1 | 0 | -5.121575 | -3.129306 | -0.905009 |
| 83 | 1 | 0 | -4.616347 | -3.515401 | 0.745703  |
| 84 | 1 | 0 | 6.430790  | 5.443344  | 0.016085  |
| 85 | 1 | 0 | 6.277267  | 4.843531  | 1.689438  |
| 86 | 1 | 0 | 7.813858  | 4.609223  | 0.795592  |

---

| Center<br>Number | Atomic<br>Number | Atomic<br>Type | Coordinates (Angstroms) |           |           |
|------------------|------------------|----------------|-------------------------|-----------|-----------|
|                  |                  |                | X                       | Y         | Z         |
| 1                | 6                | 0              | 0.891370                | 0.191293  | 1.141609  |
| 2                | 6                | 0              | -0.496099               | 0.854591  | 1.006103  |
| 3                | 1                | 0              | 0.895601                | -0.349685 | 2.091785  |
| 4                | 1                | 0              | 1.653332                | 0.974449  | 1.224138  |
| 5                | 1                | 0              | -0.523626               | 1.543627  | 0.157010  |
| 6                | 1                | 0              | -0.688396               | 1.448744  | 1.908007  |
| 7                | 6                | 0              | -3.747385               | -1.103049 | 0.138538  |
| 8                | 6                | 0              | -2.577296               | -2.015020 | -0.335855 |
| 9                | 6                | 0              | -1.354743               | -1.039752 | -0.450953 |
| 10               | 6                | 0              | -1.558480               | -0.234213 | 0.851397  |
| 11               | 6                | 0              | -2.983120               | -2.830688 | -1.542231 |
| 12               | 1                | 0              | -2.295035               | -2.734948 | 0.435980  |
| 13               | 8                | 0              | -1.512480               | -0.103995 | -1.538800 |
| 14               | 6                | 0              | 1.888807                | -3.077527 | -0.628767 |
| 15               | 6                | 0              | 2.344009                | -1.912459 | 0.310493  |
| 16               | 6                | 0              | 1.251084                | -0.772002 | -0.028108 |
| 17               | 6                | 0              | 0.035602                | -1.638548 | -0.438472 |
| 18               | 6                | 0              | 0.406785                | -2.877020 | -0.780376 |
| 19               | 1                | 0              | 2.382183                | -3.018455 | -1.611196 |
| 20               | 1                | 0              | 2.141611                | -4.062061 | -0.218475 |
| 21               | 6                | 0              | 2.192678                | -2.416801 | 1.764227  |
| 22               | 6                | 0              | 1.680603                | 0.086171  | -1.247061 |
| 23               | 1                | 0              | -0.262162               | -3.652266 | -1.139333 |
| 24               | 1                | 0              | 2.491814                | -1.673648 | 2.508060  |
| 25               | 1                | 0              | 1.156881                | -2.700562 | 1.974509  |
| 26               | 1                | 0              | 2.810642                | -3.305619 | 1.922528  |
| 27               | 1                | 0              | 0.866242                | 0.749914  | -1.544750 |
| 28               | 1                | 0              | 2.550627                | 0.707211  | -1.015580 |
| 29               | 1                | 0              | 1.930886                | -0.535484 | -2.112573 |
| 30               | 6                | 0              | 3.834793                | -1.524190 | 0.021193  |
| 31               | 6                | 0              | 4.371629                | -0.413158 | 0.956045  |
| 32               | 6                | 0              | 5.641592                | 0.284089  | 0.486190  |
| 33               | 6                | 0              | 6.201863                | 1.337405  | 1.457346  |
| 34               | 6                | 0              | 6.822627                | 2.397038  | 0.531579  |
| 35               | 6                | 0              | 6.027400                | 2.216406  | -0.758417 |
| 36               | 8                | 0              | 5.359532                | 1.039594  | -0.741860 |
| 37               | 1                | 0              | 6.415010                | -0.442741 | 0.217321  |
| 38               | 1                | 0              | 6.920821                | 0.899797  | 2.155224  |
| 39               | 1                | 0              | 5.383326                | 1.771837  | 2.041831  |
| 40               | 1                | 0              | 6.651210                | 3.414858  | 0.893727  |
| 41               | 6                | 0              | 8.329347                | 2.213372  | 0.265603  |
| 42               | 1                | 0              | 3.868647                | -1.138533 | -1.003079 |
| 43               | 1                | 0              | 4.592923                | -0.836935 | 1.944768  |
| 44               | 1                | 0              | 3.618170                | 0.363368  | 1.115797  |
| 45               | 8                | 0              | 5.968798                | 2.970011  | -1.708749 |
| 46               | 1                | 0              | 8.681026                | 2.932909  | -0.479112 |
| 47               | 1                | 0              | 8.890509                | 2.373006  | 1.191199  |
| 48               | 1                | 0              | 8.555403                | 1.205576  | -0.099218 |
| 49               | 1                | 0              | -1.365463               | -0.963151 | 1.651738  |
| 50               | 6                | 0              | -3.081141               | 0.101618  | 0.960491  |
| 51               | 6                | 0              | -3.478217               | 0.124858  | 2.448404  |

|    |   |   |           |           |           |
|----|---|---|-----------|-----------|-----------|
| 52 | 6 | 0 | -3.372634 | 1.483555  | 0.310260  |
| 53 | 1 | 0 | -4.543785 | 0.318367  | 2.599139  |
| 54 | 1 | 0 | -3.249978 | -0.826903 | 2.936274  |
| 55 | 1 | 0 | -2.923416 | 0.913575  | 2.969866  |
| 56 | 6 | 0 | -4.849525 | 1.936877  | 0.273739  |
| 57 | 6 | 0 | -4.963093 | 3.286676  | -0.396664 |
| 58 | 8 | 0 | -5.060483 | 3.464358  | -1.599342 |
| 59 | 8 | 0 | -4.912794 | 4.299512  | 0.493642  |
| 60 | 6 | 0 | -4.962271 | 5.637943  | -0.047879 |
| 61 | 6 | 0 | -4.882332 | -1.873150 | 0.814272  |
| 62 | 1 | 0 | -4.175934 | -0.655906 | -0.768307 |
| 63 | 6 | 0 | -4.706728 | -3.024045 | 1.481836  |
| 64 | 6 | 0 | -6.271979 | -1.291232 | 0.677259  |
| 65 | 1 | 0 | -5.550476 | -3.534139 | 1.938735  |
| 66 | 1 | 0 | -3.739979 | -3.500463 | 1.606120  |
| 67 | 1 | 0 | -6.523780 | -1.118834 | -0.376966 |
| 68 | 1 | 0 | -7.024073 | -1.961135 | 1.102545  |
| 69 | 1 | 0 | -6.361737 | -0.324668 | 1.185265  |
| 70 | 1 | 0 | -5.268226 | 2.004924  | 1.280623  |
| 71 | 1 | 0 | -5.450552 | 1.241050  | -0.315175 |
| 72 | 1 | 0 | -2.986627 | 1.475380  | -0.711233 |
| 73 | 1 | 0 | -2.803808 | 2.240481  | 0.863057  |
| 74 | 8 | 0 | -2.606636 | -3.968595 | -1.768744 |
| 75 | 1 | 0 | -3.705186 | -2.346489 | -2.231625 |
| 76 | 6 | 0 | -1.303708 | -0.569482 | -2.868582 |
| 77 | 1 | 0 | -1.201344 | 0.322117  | -3.491663 |
| 78 | 1 | 0 | -2.158824 | -1.150390 | -3.236914 |
| 79 | 1 | 0 | -0.396821 | -1.176065 | -2.955837 |
| 80 | 6 | 0 | 4.780794  | -2.744240 | 0.060598  |
| 81 | 1 | 0 | 5.794332  | -2.460407 | -0.239912 |
| 82 | 1 | 0 | 4.848845  | -3.177924 | 1.064376  |
| 83 | 1 | 0 | 4.459121  | -3.532108 | -0.625176 |
| 84 | 1 | 0 | -5.897311 | 5.791911  | -0.590655 |
| 85 | 1 | 0 | -4.905820 | 6.300783  | 0.814397  |
| 86 | 1 | 0 | -4.117695 | 5.806661  | -0.719329 |

---

| Center<br>Number | Atomic<br>Number | Atomic<br>Type | Coordinates (Angstroms) |           |           |
|------------------|------------------|----------------|-------------------------|-----------|-----------|
|                  |                  |                | X                       | Y         | Z         |
| 1                | 6                | 0              | -0.936633               | 0.149331  | -1.129585 |
| 2                | 6                | 0              | 0.449769                | 0.819043  | -1.022032 |
| 3                | 1                | 0              | -0.947261               | -0.413544 | -2.066971 |
| 4                | 1                | 0              | -1.702271               | 0.927451  | -1.223237 |
| 5                | 1                | 0              | 0.482941                | 1.530297  | -0.191694 |
| 6                | 1                | 0              | 0.633455                | 1.389384  | -1.940726 |
| 7                | 6                | 0              | 3.719873                | -1.139307 | -0.196655 |
| 8                | 6                | 0              | 2.565118                | -1.985050 | 0.407913  |
| 9                | 6                | 0              | 1.327425                | -1.029567 | 0.482256  |
| 10               | 6                | 0              | 1.515023                | -0.262938 | -0.845957 |
| 11               | 6                | 0              | 2.965403                | -2.741024 | 1.653494  |
| 12               | 1                | 0              | 2.259499                | -2.776586 | -0.290155 |
| 13               | 8                | 0              | 1.466887                | -0.053770 | 1.538357  |
| 14               | 6                | 0              | -1.916580               | -3.075287 | 0.729530  |
| 15               | 6                | 0              | -2.375683               | -1.938291 | -0.240577 |
| 16               | 6                | 0              | -1.284275               | -0.787376 | 0.065083  |
| 17               | 6                | 0              | -0.061406               | -1.638301 | 0.491418  |
| 18               | 6                | 0              | -0.434436               | -2.866557 | 0.866801  |
| 19               | 1                | 0              | -2.405011               | -2.987402 | 1.712123  |
| 20               | 1                | 0              | -2.169200               | -4.071512 | 0.348761  |
| 21               | 6                | 0              | -2.225915               | -2.482341 | -1.680072 |
| 22               | 6                | 0              | -1.709742               | 0.096916  | 1.266699  |
| 23               | 1                | 0              | 0.224544                | -3.641085 | 1.246624  |
| 24               | 1                | 0              | -2.531756               | -1.762027 | -2.443182 |
| 25               | 1                | 0              | -1.189161               | -2.765362 | -1.886448 |
| 26               | 1                | 0              | -2.839456               | -3.378574 | -1.811622 |
| 27               | 1                | 0              | -0.898182               | 0.773979  | 1.540486  |
| 28               | 1                | 0              | -2.586741               | 0.704576  | 1.026822  |
| 29               | 1                | 0              | -1.948020               | -0.505248 | 2.149214  |
| 30               | 6                | 0              | -3.866882               | -1.545994 | 0.041648  |
| 31               | 6                | 0              | -4.407607               | -0.460788 | -0.920601 |
| 32               | 6                | 0              | -5.684363               | 0.238569  | -0.472921 |
| 33               | 6                | 0              | -6.244451               | 1.266675  | -1.470869 |
| 34               | 6                | 0              | -6.876119               | 2.343461  | -0.572724 |
| 35               | 6                | 0              | -6.087708               | 2.196190  | 0.725641  |
| 36               | 8                | 0              | -5.413814               | 1.022471  | 0.739631  |
| 37               | 1                | 0              | -6.455465               | -0.486500 | -0.192984 |
| 38               | 1                | 0              | -6.957081               | 0.809391  | -2.162577 |
| 39               | 1                | 0              | -5.424962               | 1.692246  | -2.060461 |
| 40               | 1                | 0              | -6.707917               | 3.353785  | -0.956709 |
| 41               | 6                | 0              | -8.383306               | 2.157493  | -0.311356 |
| 42               | 1                | 0              | -3.899525               | -1.134092 | 1.055708  |
| 43               | 1                | 0              | -4.621335               | -0.908445 | -1.900368 |
| 44               | 1                | 0              | -3.658995               | 0.317265  | -1.094406 |
| 45               | 8                | 0              | -6.038584               | 2.971099  | 1.659084  |
| 46               | 1                | 0              | -8.743233               | 2.891570  | 0.414973  |
| 47               | 1                | 0              | -8.939775               | 2.293145  | -1.243575 |
| 48               | 1                | 0              | -8.605835               | 1.156855  | 0.074669  |
| 49               | 1                | 0              | 1.315339                | -1.018604 | -1.620549 |
| 50               | 6                | 0              | 3.034081                | 0.070281  | -0.989420 |
| 51               | 6                | 0              | 3.390157                | 0.125422  | -2.487655 |

|    |   |   |           |           |           |
|----|---|---|-----------|-----------|-----------|
| 52 | 6 | 0 | 3.360972  | 1.439606  | -0.328483 |
| 53 | 1 | 0 | 4.459620  | 0.273854  | -2.661027 |
| 54 | 1 | 0 | 3.106442  | -0.796457 | -3.001739 |
| 55 | 1 | 0 | 2.859981  | 0.957347  | -2.965772 |
| 56 | 6 | 0 | 4.842939  | 1.878869  | -0.367167 |
| 57 | 6 | 0 | 5.007889  | 3.215076  | 0.319289  |
| 58 | 8 | 0 | 5.153376  | 3.373671  | 1.519591  |
| 59 | 8 | 0 | 4.943719  | 4.242986  | -0.554004 |
| 60 | 6 | 0 | 5.039580  | 5.571261  | 0.005243  |
| 61 | 6 | 0 | 4.743022  | -1.974839 | -0.966672 |
| 62 | 1 | 0 | 4.256168  | -0.706176 | 0.653247  |
| 63 | 6 | 0 | 4.420129  | -3.019067 | -1.743940 |
| 64 | 6 | 0 | 6.187686  | -1.562815 | -0.806285 |
| 65 | 1 | 0 | 5.186017  | -3.578509 | -2.274415 |
| 66 | 1 | 0 | 3.397834  | -3.355075 | -1.892313 |
| 67 | 1 | 0 | 6.859326  | -2.235402 | -1.346883 |
| 68 | 1 | 0 | 6.359618  | -0.545821 | -1.178699 |
| 69 | 1 | 0 | 6.473020  | -1.564336 | 0.252949  |
| 70 | 1 | 0 | 5.205621  | 1.961969  | -1.394361 |
| 71 | 1 | 0 | 5.468737  | 1.165106  | 0.173913  |
| 72 | 1 | 0 | 3.032186  | 1.415144  | 0.712144  |
| 73 | 1 | 0 | 2.768105  | 2.210423  | -0.835401 |
| 74 | 8 | 0 | 4.081563  | -2.729931 | 2.143957  |
| 75 | 1 | 0 | 2.179389  | -3.375866 | 2.107120  |
| 76 | 6 | 0 | 1.300497  | -0.483879 | 2.886444  |
| 77 | 1 | 0 | 0.412659  | -1.113054 | 3.010909  |
| 78 | 1 | 0 | 2.181679  | -1.021422 | 3.255232  |
| 79 | 1 | 0 | 1.179742  | 0.423802  | 3.482495  |
| 80 | 6 | 0 | -4.809925 | -2.769024 | 0.036075  |
| 81 | 1 | 0 | -5.822049 | -2.480653 | 0.336688  |
| 82 | 1 | 0 | -4.883598 | -3.225759 | -0.957032 |
| 83 | 1 | 0 | -4.482659 | -3.540430 | 0.737802  |
| 84 | 1 | 0 | 4.965919  | 6.248665  | -0.844403 |
| 85 | 1 | 0 | 4.223076  | 5.746473  | 0.709073  |
| 86 | 1 | 0 | 5.996211  | 5.698518  | 0.516448  |

---

| Center<br>Number | Atomic<br>Number | Atomic<br>Type | Coordinates (Angstroms) |           |           |
|------------------|------------------|----------------|-------------------------|-----------|-----------|
|                  |                  |                | X                       | Y         | Z         |
| 1                | 6                | 0              | -1.126052               | -0.247861 | 1.234811  |
| 2                | 6                | 0              | 0.224585                | -0.995115 | 1.276918  |
| 3                | 1                | 0              | -1.149969               | 0.416585  | 2.102799  |
| 4                | 1                | 0              | -1.937950               | -0.970871 | 1.372572  |
| 5                | 1                | 0              | 0.258585                | -1.794780 | 0.531693  |
| 6                | 1                | 0              | 0.332000                | -1.466986 | 2.261424  |
| 7                | 6                | 0              | 3.631587                | 0.644638  | 0.349030  |
| 8                | 6                | 0              | 2.547325                | 1.535243  | -0.335208 |
| 9                | 6                | 0              | 1.272738                | 0.618936  | -0.376171 |
| 10               | 6                | 0              | 1.356568                | 0.005452  | 1.039471  |
| 11               | 6                | 0              | 3.066893                | 2.120009  | -1.626907 |
| 12               | 1                | 0              | 2.275703                | 2.385451  | 0.296833  |
| 13               | 8                | 0              | 1.419460                | -0.475311 | -1.303480 |
| 14               | 6                | 0              | -1.816951               | 2.795920  | -1.022117 |
| 15               | 6                | 0              | -2.391577               | 1.805632  | 0.043628  |
| 16               | 6                | 0              | -1.362966               | 0.564982  | -0.073065 |
| 17               | 6                | 0              | -0.074332               | 1.291848  | -0.529860 |
| 18               | 6                | 0              | -0.346077               | 2.488652  | -1.060939 |
| 19               | 1                | 0              | -2.266330               | 2.627840  | -2.012751 |
| 20               | 1                | 0              | -2.022540               | 3.841878  | -0.766376 |
| 21               | 6                | 0              | -2.270276               | 2.502291  | 1.418780  |
| 22               | 6                | 0              | -1.793076               | -0.427047 | -1.185660 |
| 23               | 1                | 0              | 0.388583                | 3.164985  | -1.486002 |
| 24               | 1                | 0              | -2.650132               | 1.892304  | 2.242468  |
| 25               | 1                | 0              | -1.227202               | 2.748275  | 1.640685  |
| 26               | 1                | 0              | -2.831871               | 3.441453  | 1.419672  |
| 27               | 1                | 0              | -1.019619               | -1.182946 | -1.338474 |
| 28               | 1                | 0              | -2.719761               | -0.944997 | -0.923376 |
| 29               | 1                | 0              | -1.950076               | 0.080956  | -2.142489 |
| 30               | 6                | 0              | -3.890698               | 1.470638  | -0.268268 |
| 31               | 6                | 0              | -4.545589               | 0.550759  | 0.790651  |
| 32               | 6                | 0              | -5.835780               | -0.132971 | 0.357938  |
| 33               | 6                | 0              | -6.514223               | -0.988160 | 1.441535  |
| 34               | 6                | 0              | -7.165381               | -2.133870 | 0.648794  |
| 35               | 6                | 0              | -6.295629               | -2.205224 | -0.603149 |
| 36               | 8                | 0              | -5.546619               | -1.084716 | -0.723579 |
| 37               | 1                | 0              | -6.543855               | 0.588767  | -0.062325 |
| 38               | 1                | 0              | -7.231933               | -0.404766 | 2.024606  |
| 39               | 1                | 0              | -5.757227               | -1.380290 | 2.129776  |
| 40               | 1                | 0              | -7.088880               | -3.093381 | 1.168269  |
| 41               | 6                | 0              | -8.638860               | -1.892171 | 0.267753  |
| 42               | 1                | 0              | -3.903619               | 0.934623  | -1.223128 |
| 43               | 1                | 0              | -4.784318               | 1.133974  | 1.690062  |
| 44               | 1                | 0              | -3.853962               | -0.234969 | 1.107760  |
| 45               | 8                | 0              | -6.243603               | -3.099151 | -1.423338 |
| 46               | 1                | 0              | -9.006509               | -2.690932 | -0.382465 |
| 47               | 1                | 0              | -9.255867               | -1.871085 | 1.171061  |
| 48               | 1                | 0              | -8.769412               | -0.938524 | -0.254923 |
| 49               | 1                | 0              | 1.158203                | 0.854012  | 1.710220  |
| 50               | 6                | 0              | 2.846307                | -0.380625 | 1.296253  |
| 51               | 6                | 0              | 3.155338                | -0.227368 | 2.799462  |

|    |   |   |           |           |           |
|----|---|---|-----------|-----------|-----------|
| 52 | 6 | 0 | 3.126004  | -1.854021 | 0.879325  |
| 53 | 1 | 0 | 4.220094  | -0.343904 | 3.020530  |
| 54 | 1 | 0 | 2.845704  | 0.746755  | 3.187125  |
| 55 | 1 | 0 | 2.612634  | -0.990688 | 3.369094  |
| 56 | 6 | 0 | 4.578069  | -2.356723 | 1.014697  |
| 57 | 6 | 0 | 5.358899  | -2.437489 | -0.282765 |
| 58 | 8 | 0 | 4.915507  | -2.281348 | -1.406439 |
| 59 | 8 | 0 | 6.652599  | -2.744446 | -0.043966 |
| 60 | 6 | 0 | 7.502917  | -2.908024 | -1.199926 |
| 61 | 6 | 0 | 4.766216  | 1.461121  | 0.962393  |
| 62 | 1 | 0 | 4.081331  | 0.038663  | -0.442921 |
| 63 | 6 | 0 | 6.044784  | 1.105537  | 0.760583  |
| 64 | 6 | 0 | 4.444708  | 2.714201  | 1.750075  |
| 65 | 1 | 0 | 6.866394  | 1.672809  | 1.190418  |
| 66 | 1 | 0 | 6.314413  | 0.242832  | 0.158372  |
| 67 | 1 | 0 | 5.330912  | 3.078154  | 2.277022  |
| 68 | 1 | 0 | 4.103880  | 3.518327  | 1.086208  |
| 69 | 1 | 0 | 3.651173  | 2.558343  | 2.486817  |
| 70 | 1 | 0 | 4.587189  | -3.377124 | 1.418764  |
| 71 | 1 | 0 | 5.172190  | -1.769128 | 1.720757  |
| 72 | 1 | 0 | 2.796518  | -2.003460 | -0.150158 |
| 73 | 1 | 0 | 2.494052  | -2.490402 | 1.508062  |
| 74 | 8 | 0 | 2.834205  | 3.254183  | -2.014124 |
| 75 | 1 | 0 | 3.739111  | 1.467868  | -2.219506 |
| 76 | 6 | 0 | 1.303781  | -0.207384 | -2.697441 |
| 77 | 1 | 0 | 0.463743  | 0.457755  | -2.921629 |
| 78 | 1 | 0 | 2.224397  | 0.227112  | -3.106068 |
| 79 | 1 | 0 | 1.137663  | -1.172448 | -3.181889 |
| 80 | 6 | 0 | -4.750840 | 2.737321  | -0.466979 |
| 81 | 1 | 0 | -5.768114 | 2.471960  | -0.771772 |
| 82 | 1 | 0 | -4.831597 | 3.328232  | 0.452151  |
| 83 | 1 | 0 | -4.347881 | 3.385321  | -1.249446 |
| 84 | 1 | 0 | 8.485512  | -3.157939 | -0.802123 |
| 85 | 1 | 0 | 7.129158  | -3.713831 | -1.835337 |
| 86 | 1 | 0 | 7.546615  | -1.980232 | -1.774513 |

---



| Center<br>Number | Atomic<br>Number | Atomic<br>Type | Coordinates (Angstroms) |           |           |
|------------------|------------------|----------------|-------------------------|-----------|-----------|
|                  |                  |                | X                       | Y         | Z         |
| 1                | 6                | 0              | -0.939266               | 0.536055  | -0.799997 |
| 2                | 6                | 0              | 0.397776                | 1.123826  | -0.301541 |
| 3                | 1                | 0              | -0.824202               | 0.342838  | -1.869950 |
| 4                | 1                | 0              | -1.723111               | 1.295840  | -0.703603 |
| 5                | 1                | 0              | 0.311737                | 1.489085  | 0.726040  |
| 6                | 1                | 0              | 0.655830                | 1.986387  | -0.928194 |
| 7                | 6                | 0              | 3.624030                | -0.981261 | 0.238097  |
| 8                | 6                | 0              | 2.454215                | -2.015068 | 0.249383  |
| 9                | 6                | 0              | 1.184005                | -1.140249 | 0.536763  |
| 10               | 6                | 0              | 1.482530                | 0.050828  | -0.401621 |
| 11               | 6                | 0              | 2.768119                | -3.172226 | 1.167911  |
| 12               | 1                | 0              | 2.297764                | -2.445609 | -0.743869 |
| 13               | 8                | 0              | 1.188990                | -0.613867 | 1.881676  |
| 14               | 6                | 0              | -1.965311               | -3.145095 | -0.339828 |
| 15               | 6                | 0              | -2.375072               | -1.735106 | -0.880457 |
| 16               | 6                | 0              | -1.374375               | -0.765788 | -0.062958 |
| 17               | 6                | 0              | -0.169729               | -1.711098 | 0.172662  |
| 18               | 6                | 0              | -0.518180               | -2.995030 | 0.037342  |
| 19               | 1                | 0              | -2.559756               | -3.427713 | 0.542558  |
| 20               | 1                | 0              | -2.126514               | -3.935176 | -1.082375 |
| 21               | 6                | 0              | -2.054397               | -1.720865 | -2.392535 |
| 22               | 6                | 0              | -1.965612               | -0.369120 | 1.315485  |
| 23               | 1                | 0              | 0.143366                | -3.841836 | 0.189303  |
| 24               | 1                | 0              | -2.311304               | -0.774235 | -2.874928 |
| 25               | 1                | 0              | -0.990499               | -1.907348 | -2.568342 |
| 26               | 1                | 0              | -2.611105               | -2.511215 | -2.904743 |
| 27               | 1                | 0              | -1.221266               | 0.169721  | 1.905213  |
| 28               | 1                | 0              | -2.837098               | 0.282046  | 1.205422  |
| 29               | 1                | 0              | -2.273456               | -1.245842 | 1.893449  |
| 30               | 6                | 0              | -3.904413               | -1.481612 | -0.641905 |
| 31               | 6                | 0              | -4.392046               | -0.111703 | -1.170598 |
| 32               | 6                | 0              | -5.790936               | 0.308898  | -0.715523 |
| 33               | 6                | 0              | -6.201935               | 1.728079  | -1.158756 |
| 34               | 6                | 0              | -5.841232               | 2.612056  | 0.045236  |
| 35               | 6                | 0              | -5.892611               | 1.628349  | 1.209778  |
| 36               | 8                | 0              | -5.854396               | 0.355623  | 0.751143  |
| 37               | 1                | 0              | -6.535351               | -0.433341 | -1.007967 |
| 38               | 1                | 0              | -7.281792               | 1.768459  | -1.338243 |
| 39               | 1                | 0              | -5.696114               | 2.029226  | -2.079467 |
| 40               | 1                | 0              | -4.790245               | 2.927433  | -0.023532 |
| 41               | 6                | 0              | -6.712368               | 3.850782  | 0.259385  |
| 42               | 1                | 0              | -4.059259               | -1.489200 | 0.441884  |
| 43               | 1                | 0              | -4.417551               | -0.125251 | -2.267889 |
| 44               | 1                | 0              | -3.690996               | 0.680436  | -0.890213 |
| 45               | 8                | 0              | -5.945342               | 1.876424  | 2.396872  |
| 46               | 1                | 0              | -6.423050               | 4.374526  | 1.174495  |
| 47               | 1                | 0              | -6.603411               | 4.541639  | -0.582180 |
| 48               | 1                | 0              | -7.769383               | 3.576432  | 0.341558  |
| 49               | 1                | 0              | 1.392665                | -0.377599 | -1.410324 |
| 50               | 6                | 0              | 2.993952                | 0.410122  | -0.243250 |
| 51               | 6                | 0              | 3.539831                | 0.925093  | -1.589070 |

|    |   |   |           |           |           |
|----|---|---|-----------|-----------|-----------|
| 52 | 6 | 0 | 3.195332  | 1.502935  | 0.845421  |
| 53 | 1 | 0 | 4.629464  | 1.019702  | -1.583117 |
| 54 | 1 | 0 | 3.272131  | 0.264867  | -2.418273 |
| 55 | 1 | 0 | 3.116685  | 1.910943  | -1.810422 |
| 56 | 6 | 0 | 4.640400  | 1.981097  | 1.106199  |
| 57 | 6 | 0 | 5.232613  | 2.993557  | 0.147319  |
| 58 | 8 | 0 | 6.377913  | 2.966615  | -0.272045 |
| 59 | 8 | 0 | 4.370450  | 3.986786  | -0.152960 |
| 60 | 6 | 0 | 4.868183  | 5.034660  | -1.012093 |
| 61 | 6 | 0 | 4.865489  | -1.512668 | -0.473628 |
| 62 | 1 | 0 | 3.914278  | -0.831568 | 1.284139  |
| 63 | 6 | 0 | 6.071842  | -1.425192 | 0.108017  |
| 64 | 6 | 0 | 4.716282  | -2.215875 | -1.806828 |
| 65 | 1 | 0 | 6.966232  | -1.802981 | -0.380306 |
| 66 | 1 | 0 | 6.207827  | -0.977482 | 1.088778  |
| 67 | 1 | 0 | 5.693499  | -2.380512 | -2.268571 |
| 68 | 1 | 0 | 4.243002  | -3.197656 | -1.680948 |
| 69 | 1 | 0 | 4.096336  | -1.656807 | -2.513144 |
| 70 | 1 | 0 | 5.346788  | 1.151309  | 1.161110  |
| 71 | 1 | 0 | 4.658725  | 2.473384  | 2.088077  |
| 72 | 1 | 0 | 2.795409  | 1.119600  | 1.786524  |
| 73 | 1 | 0 | 2.590165  | 2.376505  | 0.584198  |
| 74 | 8 | 0 | 2.487816  | -4.336563 | 0.933866  |
| 75 | 1 | 0 | 3.331536  | -2.920995 | 2.089243  |
| 76 | 6 | 0 | 0.841514  | -1.486145 | 2.953492  |
| 77 | 1 | 0 | 0.627397  | -0.845393 | 3.812266  |
| 78 | 1 | 0 | -0.042824 | -2.088875 | 2.725359  |
| 79 | 1 | 0 | 1.668993  | -2.155287 | 3.220496  |
| 80 | 6 | 0 | -4.785126 | -2.612295 | -1.217751 |
| 81 | 1 | 0 | -5.828175 | -2.487735 | -0.911025 |
| 82 | 1 | 0 | -4.765736 | -2.629549 | -2.313334 |
| 83 | 1 | 0 | -4.469582 | -3.595821 | -0.860764 |
| 84 | 1 | 0 | 4.035456  | 5.725388  | -1.137957 |
| 85 | 1 | 0 | 5.717240  | 5.537535  | -0.544113 |
| 86 | 1 | 0 | 5.174787  | 4.621938  | -1.975641 |

---

| Center<br>Number | Atomic<br>Number | Atomic<br>Type | Coordinates (Angstroms) |           |           |
|------------------|------------------|----------------|-------------------------|-----------|-----------|
|                  |                  |                | X                       | Y         | Z         |
| 1                | 6                | 0              | -0.908920               | 0.609335  | -0.809492 |
| 2                | 6                | 0              | 0.440705                | 1.182538  | -0.328681 |
| 3                | 1                | 0              | -0.803327               | 0.393305  | -1.876135 |
| 4                | 1                | 0              | -1.677840               | 1.385207  | -0.722706 |
| 5                | 1                | 0              | 0.365442                | 1.566322  | 0.692879  |
| 6                | 1                | 0              | 0.709721                | 2.030423  | -0.970210 |
| 7                | 6                | 0              | 3.637853                | -0.982136 | 0.186276  |
| 8                | 6                | 0              | 2.443893                | -1.982509 | 0.246972  |
| 9                | 6                | 0              | 1.194981                | -1.082246 | 0.540349  |
| 10               | 6                | 0              | 1.507415                | 0.090183  | -0.416101 |
| 11               | 6                | 0              | 2.753610                | -3.135652 | 1.173849  |
| 12               | 1                | 0              | 2.249509                | -2.426466 | -0.732210 |
| 13               | 8                | 0              | 1.221964                | -0.543115 | 1.879962  |
| 14               | 6                | 0              | -1.998383               | -3.043028 | -0.273481 |
| 15               | 6                | 0              | -2.389126               | -1.635576 | -0.832866 |
| 16               | 6                | 0              | -1.362101               | -0.669559 | -0.043499 |
| 17               | 6                | 0              | -0.173082               | -1.632737 | 0.196691  |
| 18               | 6                | 0              | -0.544916               | -2.912485 | 0.085250  |
| 19               | 1                | 0              | -2.587284               | -3.300426 | 0.620342  |
| 20               | 1                | 0              | -2.183143               | -3.842184 | -1.000867 |
| 21               | 6                | 0              | -2.086861               | -1.651104 | -2.348746 |
| 22               | 6                | 0              | -1.933450               | -0.232766 | 1.331171  |
| 23               | 1                | 0              | 0.104127                | -3.767443 | 0.244649  |
| 24               | 1                | 0              | -2.335007               | -0.708157 | -2.842873 |
| 25               | 1                | 0              | -1.028111               | -1.856758 | -2.533841 |
| 26               | 1                | 0              | -2.661553               | -2.440905 | -2.841659 |
| 27               | 1                | 0              | -1.172224               | 0.301514  | 1.903436  |
| 28               | 1                | 0              | -2.793140               | 0.433004  | 1.214694  |
| 29               | 1                | 0              | -2.252485               | -1.091914 | 1.929707  |
| 30               | 6                | 0              | -3.910216               | -1.350188 | -0.582946 |
| 31               | 6                | 0              | -4.381805               | 0.008568  | -1.155572 |
| 32               | 6                | 0              | -5.711764               | 0.521979  | -0.619871 |
| 33               | 6                | 0              | -6.194770               | 1.843595  | -1.241955 |
| 34               | 6                | 0              | -6.933072               | 2.544808  | -0.089434 |
| 35               | 6                | 0              | -6.276813               | 1.934363  | 1.145622  |
| 36               | 8                | 0              | -5.580585               | 0.823044  | 0.812170  |
| 37               | 1                | 0              | -6.489933               | -0.244676 | -0.692410 |
| 38               | 1                | 0              | -6.828067               | 1.668863  | -2.115878 |
| 39               | 1                | 0              | -5.332084               | 2.437986  | -1.562704 |
| 40               | 1                | 0              | -6.745108               | 3.622271  | -0.072403 |
| 41               | 6                | 0              | -8.455439               | 2.307687  | -0.064491 |
| 42               | 1                | 0              | -4.051286               | -1.317839 | 0.502492  |
| 43               | 1                | 0              | -4.491370               | -0.067657 | -2.245513 |
| 44               | 1                | 0              | -3.637759               | 0.789294  | -0.974510 |
| 45               | 8                | 0              | -6.339707               | 2.327482  | 2.292869  |
| 46               | 1                | 0              | -8.900451               | 2.743511  | 0.834447  |
| 47               | 1                | 0              | -8.916929               | 2.775706  | -0.939237 |
| 48               | 1                | 0              | -8.698614               | 1.239771  | -0.083018 |
| 49               | 1                | 0              | 1.408447                | -0.351238 | -1.418472 |
| 50               | 6                | 0              | 3.025418                | 0.430801  | -0.266177 |
| 51               | 6                | 0              | 3.560194                | 0.918479  | -1.624751 |

|    |   |   |           |           |           |
|----|---|---|-----------|-----------|-----------|
| 52 | 6 | 0 | 3.225498  | 1.522831  | 0.823198  |
| 53 | 1 | 0 | 4.633596  | 1.128400  | -1.603042 |
| 54 | 1 | 0 | 3.396795  | 0.171165  | -2.406323 |
| 55 | 1 | 0 | 3.049030  | 1.840749  | -1.920645 |
| 56 | 6 | 0 | 4.660645  | 1.993020  | 1.124072  |
| 57 | 6 | 0 | 5.205981  | 3.036842  | 0.171745  |
| 58 | 8 | 0 | 4.570286  | 3.970393  | -0.285769 |
| 59 | 8 | 0 | 6.519372  | 2.849623  | -0.081120 |
| 60 | 6 | 0 | 7.163117  | 3.836215  | -0.917773 |
| 61 | 6 | 0 | 4.833557  | -1.525325 | -0.598776 |
| 62 | 1 | 0 | 3.984909  | -0.847704 | 1.219537  |
| 63 | 6 | 0 | 4.721515  | -2.380446 | -1.626949 |
| 64 | 6 | 0 | 6.204876  | -1.075205 | -0.145858 |
| 65 | 1 | 0 | 5.604614  | -2.742298 | -2.146630 |
| 66 | 1 | 0 | 3.769640  | -2.747806 | -1.995750 |
| 67 | 1 | 0 | 6.993052  | -1.612708 | -0.680138 |
| 68 | 1 | 0 | 6.361034  | -0.004052 | -0.315796 |
| 69 | 1 | 0 | 6.340436  | -1.248617 | 0.929439  |
| 70 | 1 | 0 | 5.368996  | 1.167345  | 1.206305  |
| 71 | 1 | 0 | 4.655670  | 2.486539  | 2.105552  |
| 72 | 1 | 0 | 2.791285  | 1.151287  | 1.752946  |
| 73 | 1 | 0 | 2.646279  | 2.407485  | 0.538911  |
| 74 | 8 | 0 | 2.392994  | -4.286993 | 0.994094  |
| 75 | 1 | 0 | 3.389024  | -2.893448 | 2.050925  |
| 76 | 6 | 0 | 0.881780  | -1.404987 | 2.961362  |
| 77 | 1 | 0 | 0.717105  | -0.758599 | 3.826765  |
| 78 | 1 | 0 | -0.028672 | -1.978601 | 2.761980  |
| 79 | 1 | 0 | 1.695175  | -2.101635 | 3.201215  |
| 80 | 6 | 0 | -4.817647 | -2.483472 | -1.109396 |
| 81 | 1 | 0 | -5.861176 | -2.307386 | -0.829776 |
| 82 | 1 | 0 | -4.782187 | -2.562465 | -2.201671 |
| 83 | 1 | 0 | -4.540487 | -3.455111 | -0.692711 |
| 84 | 1 | 0 | 7.094489  | 4.824843  | -0.458859 |
| 85 | 1 | 0 | 8.202274  | 3.518597  | -0.991221 |
| 86 | 1 | 0 | 6.696951  | 3.858093  | -1.905105 |

---

| Center<br>Number | Atomic<br>Number | Atomic<br>Type | Coordinates (Angstroms) |           |           |
|------------------|------------------|----------------|-------------------------|-----------|-----------|
|                  |                  |                | X                       | Y         | Z         |
| 1                | 6                | 0              | -0.888804               | 0.066209  | -1.159500 |
| 2                | 6                | 0              | 0.470162                | 0.799072  | -1.099000 |
| 3                | 1                | 0              | -0.901237               | -0.499941 | -2.094799 |
| 4                | 1                | 0              | -1.692713               | 0.806978  | -1.232889 |
| 5                | 1                | 0              | 0.492197                | 1.525326  | -0.281979 |
| 6                | 1                | 0              | 0.605837                | 1.359886  | -2.031732 |
| 7                | 6                | 0              | 3.832542                | -0.881241 | -0.178951 |
| 8                | 6                | 0              | 2.754263                | -1.889639 | 0.314429  |
| 9                | 6                | 0              | 1.465980                | -0.989654 | 0.407636  |
| 10               | 6                | 0              | 1.578955                | -0.241327 | -0.939195 |
| 11               | 6                | 0              | 3.213700                | -2.621358 | 1.552427  |
| 12               | 1                | 0              | 2.538793                | -2.656208 | -0.436993 |
| 13               | 8                | 0              | 1.591069                | 0.006187  | 1.442495  |
| 14               | 6                | 0              | -1.650975               | -3.195828 | 0.743773  |
| 15               | 6                | 0              | -2.189679               | -2.095205 | -0.229000 |
| 16               | 6                | 0              | -1.159025               | -0.882903 | 0.047341  |
| 17               | 6                | 0              | 0.113963                | -1.665328 | 0.458277  |
| 18               | 6                | 0              | -0.179849               | -2.908220 | 0.854333  |
| 19               | 1                | 0              | -2.128185               | -3.127015 | 1.733504  |
| 20               | 1                | 0              | -1.854173               | -4.207881 | 0.375535  |
| 21               | 6                | 0              | -2.030698               | -2.647254 | -1.664426 |
| 22               | 6                | 0              | -1.611002               | -0.014758 | 1.251275  |
| 23               | 1                | 0              | 0.538464                | -3.632847 | 1.224089  |
| 24               | 1                | 0              | -2.382427               | -1.953511 | -2.432193 |
| 25               | 1                | 0              | -0.983442               | -2.879583 | -1.880775 |
| 26               | 1                | 0              | -2.599249               | -3.575179 | -1.776925 |
| 27               | 1                | 0              | -0.840911               | 0.719484  | 1.496766  |
| 28               | 1                | 0              | -2.530732               | 0.533107  | 1.028788  |
| 29               | 1                | 0              | -1.789083               | -0.619778 | 2.145507  |
| 30               | 6                | 0              | -3.697062               | -1.785644 | 0.074979  |
| 31               | 6                | 0              | -4.308488               | -0.722564 | -0.868525 |
| 32               | 6                | 0              | -5.694711               | -0.208524 | -0.475528 |
| 33               | 6                | 0              | -6.228133               | 0.927108  | -1.372538 |
| 34               | 6                | 0              | -5.837330               | 2.208913  | -0.620829 |
| 35               | 6                | 0              | -5.735171               | 1.732107  | 0.824334  |
| 36               | 8                | 0              | -5.653462               | 0.381903  | 0.868951  |
| 37               | 1                | 0              | -6.408504               | -1.030459 | -0.403089 |
| 38               | 1                | 0              | -7.318662               | 0.862075  | -1.452976 |
| 39               | 1                | 0              | -5.812977               | 0.878201  | -2.382216 |
| 40               | 1                | 0              | -4.818318               | 2.511814  | -0.901115 |
| 41               | 6                | 0              | -6.770870               | 3.407558  | -0.798083 |
| 42               | 1                | 0              | -3.738823               | -1.383769 | 1.092577  |
| 43               | 1                | 0              | -4.411176               | -1.139501 | -1.878734 |
| 44               | 1                | 0              | -3.640386               | 0.139671  | -0.959247 |
| 45               | 8                | 0              | -5.710833               | 2.405798  | 1.833853  |
| 46               | 1                | 0              | -6.447707               | 4.245161  | -0.174122 |
| 47               | 1                | 0              | -6.772924               | 3.735835  | -1.841920 |
| 48               | 1                | 0              | -7.797787               | 3.149010  | -0.518933 |
| 49               | 1                | 0              | 1.350322                | -1.020495 | -1.679915 |
| 50               | 6                | 0              | 3.085839                | 0.100317  | -1.183896 |
| 51               | 6                | 0              | 3.403287                | -0.191491 | -2.668579 |

|    |   |   |           |           |           |
|----|---|---|-----------|-----------|-----------|
| 52 | 6 | 0 | 3.516806  | 1.579729  | -0.969919 |
| 53 | 1 | 0 | 4.464594  | -0.045551 | -2.891206 |
| 54 | 1 | 0 | 3.130692  | -1.211484 | -2.952776 |
| 55 | 1 | 0 | 2.830371  | 0.487452  | -3.310794 |
| 56 | 6 | 0 | 3.343959  | 2.241890  | 0.414286  |
| 57 | 6 | 0 | 3.933936  | 3.633854  | 0.394340  |
| 58 | 8 | 0 | 5.126636  | 3.886740  | 0.343851  |
| 59 | 8 | 0 | 2.983829  | 4.592444  | 0.420275  |
| 60 | 6 | 0 | 3.447153  | 5.960117  | 0.378987  |
| 61 | 6 | 0 | 5.137552  | -1.506494 | -0.658697 |
| 62 | 1 | 0 | 4.092933  | -0.278106 | 0.695698  |
| 63 | 6 | 0 | 6.306291  | -0.910525 | -0.372836 |
| 64 | 6 | 0 | 5.106754  | -2.811508 | -1.424189 |
| 65 | 1 | 0 | 7.252095  | -1.322214 | -0.715513 |
| 66 | 1 | 0 | 6.355087  | 0.006764  | 0.208284  |
| 67 | 1 | 0 | 6.108210  | -3.079735 | -1.771513 |
| 68 | 1 | 0 | 4.743793  | -3.632853 | -0.794208 |
| 69 | 1 | 0 | 4.445546  | -2.769525 | -2.295205 |
| 70 | 1 | 0 | 3.884423  | 1.682675  | 1.182873  |
| 71 | 1 | 0 | 2.297886  | 2.285563  | 0.710559  |
| 72 | 1 | 0 | 2.979520  | 2.189080  | -1.707753 |
| 73 | 1 | 0 | 4.578266  | 1.645883  | -1.238888 |
| 74 | 8 | 0 | 2.971722  | -3.793311 | 1.792453  |
| 75 | 1 | 0 | 3.849813  | -2.042034 | 2.251323  |
| 76 | 6 | 0 | 1.424288  | -0.394047 | 2.799740  |
| 77 | 1 | 0 | 0.577634  | -1.075284 | 2.928492  |
| 78 | 1 | 0 | 2.328793  | -0.869526 | 3.199111  |
| 79 | 1 | 0 | 1.238026  | 0.520076  | 3.368779  |
| 80 | 6 | 0 | -4.571307 | -3.059189 | 0.073434  |
| 81 | 1 | 0 | -5.574625 | -2.842234 | 0.452229  |
| 82 | 1 | 0 | -4.684239 | -3.478722 | -0.932594 |
| 83 | 1 | 0 | -4.157017 | -3.838788 | 0.717334  |
| 84 | 1 | 0 | 4.085614  | 6.169710  | 1.239807  |
| 85 | 1 | 0 | 4.004298  | 6.143778  | -0.542251 |
| 86 | 1 | 0 | 2.546481  | 6.571557  | 0.411571  |

---

| Center<br>Number | Atomic<br>Number | Atomic<br>Type | Coordinates (Angstroms) |           |           |
|------------------|------------------|----------------|-------------------------|-----------|-----------|
|                  |                  |                | X                       | Y         | Z         |
| 1                | 6                | 0              | -0.891719               | 0.616218  | -0.786071 |
| 2                | 6                | 0              | 0.461246                | 1.177546  | -0.300004 |
| 3                | 1                | 0              | -0.788556               | 0.415710  | -1.855964 |
| 4                | 1                | 0              | -1.657699               | 1.393481  | -0.686754 |
| 5                | 1                | 0              | 0.390835                | 1.549032  | 0.726466  |
| 6                | 1                | 0              | 0.733375                | 2.031649  | -0.931910 |
| 7                | 6                | 0              | 3.644620                | -0.991680 | 0.233919  |
| 8                | 6                | 0              | 2.454141                | -2.001563 | 0.252899  |
| 9                | 6                | 0              | 1.205146                | -1.097540 | 0.545630  |
| 10               | 6                | 0              | 1.521974                | 0.081184  | -0.402174 |
| 11               | 6                | 0              | 2.749131                | -3.161812 | 1.173002  |
| 12               | 1                | 0              | 2.283254                | -2.430624 | -0.738654 |
| 13               | 8                | 0              | 1.234847                | -0.564094 | 1.887235  |
| 14               | 6                | 0              | -1.989382               | -3.042229 | -0.296991 |
| 15               | 6                | 0              | -2.374635               | -1.627766 | -0.843036 |
| 16               | 6                | 0              | -1.349684               | -0.672350 | -0.038246 |
| 17               | 6                | 0              | -0.163339               | -1.640787 | 0.195800  |
| 18               | 6                | 0              | -0.537217               | -2.918484 | 0.069445  |
| 19               | 1                | 0              | -2.582872               | -3.307778 | 0.591352  |
| 20               | 1                | 0              | -2.172403               | -3.833139 | -1.033727 |
| 21               | 6                | 0              | -2.065197               | -1.627093 | -2.357441 |
| 22               | 6                | 0              | -1.926815               | -0.250744 | 1.338816  |
| 23               | 1                | 0              | 0.108810                | -3.777196 | 0.221386  |
| 24               | 1                | 0              | -2.310603               | -0.678603 | -2.842181 |
| 25               | 1                | 0              | -1.005734               | -1.831475 | -2.539883 |
| 26               | 1                | 0              | -2.638095               | -2.411008 | -2.861695 |
| 27               | 1                | 0              | -1.168776               | 0.279204  | 1.919317  |
| 28               | 1                | 0              | -2.786660               | 0.415248  | 1.225607  |
| 29               | 1                | 0              | -2.247628               | -1.116040 | 1.927423  |
| 30               | 6                | 0              | -3.896310               | -1.342609 | -0.596878 |
| 31               | 6                | 0              | -4.363081               | 0.023809  | -1.155030 |
| 32               | 6                | 0              | -5.693926               | 0.532939  | -0.617389 |
| 33               | 6                | 0              | -6.173310               | 1.862557  | -1.225114 |
| 34               | 6                | 0              | -6.914408               | 2.550698  | -0.066504 |
| 35               | 6                | 0              | -6.262354               | 1.924990  | 1.163095  |
| 36               | 8                | 0              | -5.566539               | 0.816795  | 0.818461  |
| 37               | 1                | 0              | -6.472934               | -0.231710 | -0.701369 |
| 38               | 1                | 0              | -6.804055               | 1.699161  | -2.103064 |
| 39               | 1                | 0              | -5.308854               | 2.459620  | -1.535991 |
| 40               | 1                | 0              | -6.725649               | 3.627718  | -0.036143 |
| 41               | 6                | 0              | -8.437043               | 2.314501  | -0.048914 |
| 42               | 1                | 0              | -4.042247               | -1.323209 | 0.488208  |
| 43               | 1                | 0              | -4.469188               | -0.039402 | -2.246131 |
| 44               | 1                | 0              | -3.618159               | 0.800877  | -0.962162 |
| 45               | 8                | 0              | -6.327950               | 2.304501  | 2.314745  |
| 46               | 1                | 0              | -8.884333               | 2.739676  | 0.853987  |
| 47               | 1                | 0              | -8.895611               | 2.793558  | -0.919208 |
| 48               | 1                | 0              | -8.681004               | 1.247086  | -0.081186 |
| 49               | 1                | 0              | 1.415159                | -0.351297 | -1.407635 |
| 50               | 6                | 0              | 3.041294                | 0.408998  | -0.256223 |
| 51               | 6                | 0              | 3.587977                | 0.901870  | -1.609937 |

|    |   |   |           |           |           |
|----|---|---|-----------|-----------|-----------|
| 52 | 6 | 0 | 3.280953  | 1.505037  | 0.821093  |
| 53 | 1 | 0 | 4.678949  | 0.990427  | -1.606488 |
| 54 | 1 | 0 | 3.315516  | 0.231601  | -2.429459 |
| 55 | 1 | 0 | 3.173194  | 1.888049  | -1.842105 |
| 56 | 6 | 0 | 4.739143  | 1.960439  | 1.021525  |
| 57 | 6 | 0 | 5.181241  | 3.106935  | 0.134708  |
| 58 | 8 | 0 | 4.463021  | 3.995486  | -0.289433 |
| 59 | 8 | 0 | 6.511090  | 3.068471  | -0.094841 |
| 60 | 6 | 0 | 7.065991  | 4.160073  | -0.860646 |
| 61 | 6 | 0 | 4.876762  | -1.554545 | -0.469486 |
| 62 | 1 | 0 | 3.936386  | -0.839378 | 1.279002  |
| 63 | 6 | 0 | 6.081377  | -1.493558 | 0.120125  |
| 64 | 6 | 0 | 4.719528  | -2.261623 | -1.799559 |
| 65 | 1 | 0 | 6.969325  | -1.897147 | -0.359486 |
| 66 | 1 | 0 | 6.220146  | -1.046488 | 1.100990  |
| 67 | 1 | 0 | 5.695734  | -2.459654 | -2.250354 |
| 68 | 1 | 0 | 4.215137  | -3.227414 | -1.671524 |
| 69 | 1 | 0 | 4.123795  | -1.688887 | -2.515531 |
| 70 | 1 | 0 | 5.455247  | 1.142525  | 0.920351  |
| 71 | 1 | 0 | 4.855326  | 2.339667  | 2.046210  |
| 72 | 1 | 0 | 2.895925  | 1.136139  | 1.773592  |
| 73 | 1 | 0 | 2.688526  | 2.389449  | 0.565285  |
| 74 | 8 | 0 | 2.454850  | -4.322803 | 0.938611  |
| 75 | 1 | 0 | 3.312552  | -2.917614 | 2.096203  |
| 76 | 6 | 0 | 0.867535  | -1.418598 | 2.966253  |
| 77 | 1 | 0 | -0.045485 | -1.982999 | 2.753961  |
| 78 | 1 | 0 | 1.669066  | -2.122796 | 3.222243  |
| 79 | 1 | 0 | 0.695171  | -0.767162 | 3.826378  |
| 80 | 6 | 0 | -4.803088 | -2.467798 | -1.141443 |
| 81 | 1 | 0 | -5.847427 | -2.293908 | -0.863568 |
| 82 | 1 | 0 | -4.763481 | -2.532493 | -2.234529 |
| 83 | 1 | 0 | -4.528876 | -3.445163 | -0.736356 |
| 84 | 1 | 0 | 6.883195  | 5.110695  | -0.354878 |
| 85 | 1 | 0 | 8.134283  | 3.956746  | -0.920771 |
| 86 | 1 | 0 | 6.623572  | 4.186312  | -1.858822 |

---



| Center<br>Number | Atomic<br>Number | Atomic<br>Type | Coordinates (Angstroms) |           |           |
|------------------|------------------|----------------|-------------------------|-----------|-----------|
|                  |                  |                | X                       | Y         | Z         |
| 1                | 6                | 0              | -0.856796               | 0.081493  | -1.083501 |
| 2                | 6                | 0              | 0.508287                | 0.770536  | -0.875917 |
| 3                | 1                | 0              | -0.827663               | -0.390046 | -2.069513 |
| 4                | 1                | 0              | -1.640582               | 0.846061  | -1.126925 |
| 5                | 1                | 0              | 0.501924                | 1.400653  | 0.018577  |
| 6                | 1                | 0              | 0.691380                | 1.425548  | -1.735185 |
| 7                | 6                | 0              | 3.801633                | -1.156642 | -0.075221 |
| 8                | 6                | 0              | 2.658690                | -2.112316 | 0.340545  |
| 9                | 6                | 0              | 1.394135                | -1.194344 | 0.462698  |
| 10               | 6                | 0              | 1.603900                | -0.292560 | -0.773868 |
| 11               | 6                | 0              | 3.010580                | -2.992484 | 1.518566  |
| 12               | 1                | 0              | 2.413592                | -2.819253 | -0.464614 |
| 13               | 8                | 0              | 1.483735                | -0.317629 | 1.608591  |
| 14               | 6                | 0              | -1.797659               | -3.336122 | 0.400370  |
| 15               | 6                | 0              | -2.269764               | -2.108582 | -0.445358 |
| 16               | 6                | 0              | -1.211402               | -0.973647 | 0.003504  |
| 17               | 6                | 0              | 0.022204                | -1.834361 | 0.371362  |
| 18               | 6                | 0              | -0.326156               | -3.105619 | 0.598318  |
| 19               | 1                | 0              | -2.309905               | -3.376405 | 1.373658  |
| 20               | 1                | 0              | -2.010533               | -4.288658 | -0.098323 |
| 21               | 6                | 0              | -2.084739               | -2.489517 | -1.932605 |
| 22               | 6                | 0              | -1.685245               | -0.225206 | 1.276933  |
| 23               | 1                | 0              | 0.343866                | -3.902176 | 0.905814  |
| 24               | 1                | 0              | -2.388272               | -1.694654 | -2.618592 |
| 25               | 1                | 0              | -1.039838               | -2.733455 | -2.148465 |
| 26               | 1                | 0              | -2.680237               | -3.375296 | -2.172969 |
| 27               | 1                | 0              | -0.898547               | 0.439896  | 1.637766  |
| 28               | 1                | 0              | -2.570927               | 0.384310  | 1.077570  |
| 29               | 1                | 0              | -1.930339               | -0.917895 | 2.087993  |
| 30               | 6                | 0              | -3.775371               | -1.786594 | -0.146479 |
| 31               | 6                | 0              | -4.325579               | -0.596734 | -0.968686 |
| 32               | 6                | 0              | -5.699705               | -0.078758 | -0.539474 |
| 33               | 6                | 0              | -6.165877               | 1.183659  | -1.292993 |
| 34               | 6                | 0              | -5.738788               | 2.340796  | -0.376778 |
| 35               | 6                | 0              | -5.696144               | 1.680588  | 0.997409  |
| 36               | 8                | 0              | -5.667621               | 0.333339  | 0.870232  |
| 37               | 1                | 0              | -6.447535               | -0.871961 | -0.586109 |
| 38               | 1                | 0              | -7.256184               | 1.177259  | -1.399015 |
| 39               | 1                | 0              | -5.730903               | 1.244800  | -2.293619 |
| 40               | 1                | 0              | -4.699779               | 2.626498  | -0.594959 |
| 41               | 6                | 0              | -6.612347               | 3.595516  | -0.419347 |
| 42               | 1                | 0              | -3.835371               | -1.507907 | 0.910635  |
| 43               | 1                | 0              | -4.422115               | -0.887557 | -2.022817 |
| 44               | 1                | 0              | -3.623804               | 0.242820  | -0.944547 |
| 45               | 8                | 0              | -5.673560               | 2.218306  | 2.085372  |
| 46               | 1                | 0              | -6.272143               | 4.328732  | 0.316893  |
| 47               | 1                | 0              | -6.567312               | 4.055784  | -1.411003 |
| 48               | 1                | 0              | -7.657894               | 3.352485  | -0.202358 |
| 49               | 1                | 0              | 1.445191                | -0.970033 | -1.626639 |
| 50               | 6                | 0              | 3.121518                | 0.077738  | -0.841338 |
| 51               | 6                | 0              | 3.529579                | 0.178337  | -2.323467 |

|    |   |   |           |           |           |
|----|---|---|-----------|-----------|-----------|
| 52 | 6 | 0 | 3.545169  | 1.369225  | -0.081135 |
| 53 | 1 | 0 | 4.571012  | 0.495684  | -2.444185 |
| 54 | 1 | 0 | 3.416707  | -0.782314 | -2.832473 |
| 55 | 1 | 0 | 2.898687  | 0.904973  | -2.846865 |
| 56 | 6 | 0 | 3.193830  | 2.724547  | -0.714606 |
| 57 | 6 | 0 | 3.845953  | 3.883431  | 0.011308  |
| 58 | 8 | 0 | 4.898568  | 3.839498  | 0.623723  |
| 59 | 8 | 0 | 3.126261  | 5.018103  | -0.126156 |
| 60 | 6 | 0 | 3.681410  | 6.209603  | 0.472918  |
| 61 | 6 | 0 | 4.977065  | -1.821176 | -0.781277 |
| 62 | 1 | 0 | 4.203975  | -0.752689 | 0.859496  |
| 63 | 6 | 0 | 4.869850  | -2.899599 | -1.570910 |
| 64 | 6 | 0 | 6.323725  | -1.183061 | -0.528856 |
| 65 | 1 | 0 | 5.744846  | -3.328582 | -2.052019 |
| 66 | 1 | 0 | 3.924795  | -3.396059 | -1.770969 |
| 67 | 1 | 0 | 6.565755  | -1.214455 | 0.540948  |
| 68 | 1 | 0 | 7.120766  | -1.691081 | -1.078953 |
| 69 | 1 | 0 | 6.330155  | -0.125562 | -0.819815 |
| 70 | 1 | 0 | 2.119789  | 2.910704  | -0.754222 |
| 71 | 1 | 0 | 3.557093  | 2.782212  | -1.749111 |
| 72 | 1 | 0 | 4.634499  | 1.340130  | 0.028022  |
| 73 | 1 | 0 | 3.131958  | 1.328080  | 0.930336  |
| 74 | 8 | 0 | 4.083986  | -2.985823 | 2.096187  |
| 75 | 1 | 0 | 2.228630  | -3.708807 | 1.836829  |
| 76 | 6 | 0 | 1.285213  | -0.874235 | 2.906112  |
| 77 | 1 | 0 | 2.174306  | -1.407029 | 3.261294  |
| 78 | 1 | 0 | 1.100668  | -0.030301 | 3.575289  |
| 79 | 1 | 0 | 0.421774  | -1.547410 | 2.936904  |
| 80 | 6 | 0 | -4.687354 | -3.020062 | -0.327040 |
| 81 | 1 | 0 | -5.694823 | -2.816596 | 0.047921  |
| 82 | 1 | 0 | -4.781831 | -3.310607 | -1.379389 |
| 83 | 1 | 0 | -4.316529 | -3.885271 | 0.227956  |
| 84 | 1 | 0 | 4.653778  | 6.438775  | 0.031357  |
| 85 | 1 | 0 | 2.965966  | 7.001802  | 0.256691  |
| 86 | 1 | 0 | 3.792123  | 6.075415  | 1.550981  |

---
